# Supplementary material for: The Use of Pro-Angiogenic and/or Pro-Hypoxic miRNAs as Tools to Monitor Patients with Diffuse Gliomas
Source: MDPI journal article supplement (doi:10.3390/ijms23116042), 2022-05-27
Supplement: s1 [file s1]

**Table S1.** Patients' data for each histology.

|                                            | isocitrate<br>dehydrogenase 1/2<br>(IDH)-mutant and<br>1p19q-codeleted<br>oligodendrogliomas | IDH-mutant<br>astrocytomas                                            | IDH-mutant<br>glioblastomas                                        | IDH-wild type<br>glioblastomas                                      |
|--------------------------------------------|----------------------------------------------------------------------------------------------|-----------------------------------------------------------------------|--------------------------------------------------------------------|---------------------------------------------------------------------|
|                                            | n=27                                                                                         | n=25                                                                  | n=8                                                                | n=37                                                                |
| <b>Main molecular alterations</b>          | IDH1/2 mutation<br>1p19q deletion                                                            | IDH1/2 mutation<br>ATRX loss                                          | IDH1/2 mutation<br>ATRX loss                                       |                                                                     |
| <b>Grading</b>                             | 11 grade II<br>16 grade III                                                                  | 18 grade II<br>7 grade III                                            | 8 grade IV                                                         | 37 grade IV                                                         |
| <b>Gender</b>                              | 15 (55.5%) men<br>12 (44.5%) women                                                           | 14 (56%) men<br>11 (44%) women                                        | 5 (62.5%) men<br>3 (37.5%) women                                   | 26 (70.3%) men<br>11 (29.3%) women                                  |
| <b>Median age at diagnosis (range)</b>     | 51.4 years<br>[26.7-63.9]                                                                    | 36.3 years<br>[23.6-66.9]                                             | 37.9 years<br>[22.3-73.5]                                          | 67.3 years<br>[50.2-79.3]                                           |
| <b>Resection</b>                           |                                                                                              |                                                                       |                                                                    |                                                                     |
| <i>Complete:</i>                           | 13 (48%)                                                                                     | 5 (20%)                                                               | 4 (50%)                                                            | 19 (52%)                                                            |
| <i>Subtotal:</i>                           | 3 (11%)                                                                                      | 5 (20%)                                                               | 0                                                                  | 5 (14%)                                                             |
| <i>Partial:</i>                            | 11 (41%)                                                                                     | 13 (52%)                                                              | 4 (50%)                                                            | 7 (19%)                                                             |
| <i>Only biopsied:</i>                      | 0                                                                                            | 1 (4%)                                                                | 0                                                                  | 6 (16%)                                                             |
| <i>Unknown :</i>                           | 0                                                                                            | 1 (4%)                                                                | 0                                                                  | 0                                                                   |
| <b>Treatment following surgery</b>         |                                                                                              |                                                                       |                                                                    |                                                                     |
| <i>Stupp protocol:</i>                     | 2 (7%)                                                                                       | 5 (20%)                                                               | 4 (50%)                                                            | 28 (76%)                                                            |
| <i>Radiotherapy:</i>                       | 9 (33%)                                                                                      | 2 (8%)                                                                | 2 (25%)                                                            | 3 (8%)                                                              |
| <i>Chemotherapy:</i>                       | 5 (19%)                                                                                      | 4 (16%)                                                               | 2 (25%)                                                            | 1 (2%)                                                              |
| <i>None:</i>                               | 8 (29%)                                                                                      | 14 (56%)                                                              | 0                                                                  | 3 (8%)                                                              |
| <i>Unknown :</i>                           | 3 (11%)                                                                                      | 0                                                                     | 0                                                                  | 2 (2%)                                                              |
| <b>Median follow-up period (range)</b>     | 72.64 months<br>[7.85-304.23]                                                                | 62.82 months<br>[7.26-121.48]                                         | 39.34 months<br>[8.64-114.00]                                      | 8.67 months<br>[0.26-61.24]                                         |
| <b>Recurrence (number / delay [range])</b> | 15 patients<br><i>median period:</i><br>55.03 months<br>[7.79-130.07]                        | 12 patients<br><i>median period:</i><br>22.19 months<br>[8.51-210.23] | 4 patients<br><i>median period:</i><br>7.62 months<br>[6.54-40.77] | 19 patients<br><i>median period:</i><br>7.03 months<br>[1.12-24.18] |
| <b>Median overall survival OS</b>          | 119 months                                                                                   | 92.2 months                                                           | 19.7 months                                                        | 14.1 months                                                         |

OS: overall survival; IDH: isocitrate dehydrogenase; ATRX: alpha-thalassemia retardation syndrome

**Table S2.** Main targets of the miRNA studied.

| miRNA Name     | Gene Symbol                | Gene Description                                                                                  |
|----------------|----------------------------|---------------------------------------------------------------------------------------------------|
| hsa-miR-100-5p | <a href="#">TRIB2</a>      | tribbles pseudokinase 2                                                                           |
| hsa-miR-100-5p | <a href="#">KBTBD8</a>     | kelch repeat and BTB domain containing 8                                                          |
| hsa-miR-100-5p | <a href="#">SMARCA5</a>    | SWI/SNF related, matrix associated, actin dependent regulator of chromatin, subfamily a, member 5 |
| hsa-miR-100-5p | <a href="#">MTOR</a>       | mechanistic target of rapamycin kinase                                                            |
| hsa-miR-100-5p | <a href="#">HS3ST2</a>     | heparan sulfate-glucosamine 3-sulfotransferase 2                                                  |
| hsa-miR-100-5p | <a href="#">RAVER2</a>     | ribonucleoprotein, PTB binding 2                                                                  |
| hsa-miR-100-5p | <a href="#">ZZEF1</a>      | zinc finger ZZ-type and EF-hand domain containing 1                                               |
| hsa-miR-100-5p | <a href="#">BAZ2A</a>      | bromodomain adjacent to zinc finger domain 2A                                                     |
| hsa-miR-100-5p | <a href="#">NOX4</a>       | NADPH oxidase 4                                                                                   |
| hsa-miR-100-5p | <a href="#">HS3ST3B1</a>   | heparan sulfate-glucosamine 3-sulfotransferase 3B1                                                |
| hsa-miR-100-5p | <a href="#">ETFDH</a>      | electron transfer flavoprotein dehydrogenase                                                      |
| hsa-miR-100-5p | <a href="#">TTC39A</a>     | tetratricopeptide repeat domain 39A                                                               |
| hsa-miR-100-5p | <a href="#">FZD8</a>       | frizzled class receptor 8                                                                         |
| hsa-miR-100-5p | <a href="#">NR6A1</a>      | nuclear receptor subfamily 6 group A member 1                                                     |
| hsa-miR-100-5p | <a href="#">FGFR3</a>      | fibroblast growth factor receptor 3                                                               |
| hsa-miR-100-5p | <a href="#">PCSK9</a>      | proprotein convertase subtilisin/kexin type 9                                                     |
| hsa-miR-100-5p | <a href="#">ATP11C</a>     | ATPase phospholipid transporting 11C                                                              |
| hsa-miR-100-5p | <a href="#">CTDSPL</a>     | CTD small phosphatase like                                                                        |
| hsa-miR-100-5p | <a href="#">TAOK1</a>      | TAO kinase 1                                                                                      |
| hsa-miR-100-5p | <a href="#">MBNL1</a>      | muscleblind like splicing regulator 1                                                             |
| hsa-miR-100-5p | <a href="#">PRDM1</a>      | PR/SET domain 1                                                                                   |
| hsa-miR-100-5p | <a href="#">ADCY1</a>      | adenylate cyclase 1                                                                               |
| hsa-miR-100-5p | <a href="#">MTMR3</a>      | myotubularin related protein 3                                                                    |
| hsa-miR-100-5p | <a href="#">AGO2</a>       | argonaute RISC catalytic component 2                                                              |
| hsa-miR-100-5p | <a href="#">THAP2</a>      | THAP domain containing 2                                                                          |
| hsa-miR-100-5p | <a href="#">ZADH2</a>      | zinc binding alcohol dehydrogenase domain containing 2                                            |
| hsa-miR-100-5p | <a href="#">ST6GALNAC4</a> | ST6 N-acetylgalactosaminide alpha-2,6-sialyltransferase 4                                         |
| hsa-miR-100-5p | <a href="#">ZNF197</a>     | zinc finger protein 197                                                                           |
| hsa-miR-100-5p | <a href="#">RMND5A</a>     | required for meiotic nuclear division 5 homolog A                                                 |
| hsa-miR-100-5p | <a href="#">LRRC8B</a>     | leucine rich repeat containing 8 VRAC subunit B                                                   |
| hsa-miR-100-5p | <a href="#">PPP3CA</a>     | protein phosphatase 3 catalytic subunit alpha                                                     |
| hsa-miR-100-5p | <a href="#">EPDR1</a>      | ependymin related 1                                                                               |
| hsa-miR-100-5p | <a href="#">HOXA1</a>      | homeobox A1                                                                                       |
| hsa-miR-100-5p | <a href="#">TRIM71</a>     | tripartite motif containing 71                                                                    |
| hsa-miR-100-5p | <a href="#">AP1AR</a>      | adaptor related protein complex 1 associated regulatory protein                                   |
| hsa-miR-100-5p | <a href="#">RAP1B</a>      | RAP1B, member of RAS oncogene family                                                              |
| hsa-miR-100-5p | <a href="#">RNF144B</a>    | ring finger protein 144B                                                                          |

|                |                           |                                                                   |
|----------------|---------------------------|-------------------------------------------------------------------|
| hsa-miR-100-5p | <a href="#">PPFIA3</a>    | PTPRF interacting protein alpha 3                                 |
| hsa-miR-100-5p | <a href="#">HES7</a>      | hes family bHLH transcription factor 7                            |
| hsa-miR-100-5p | <a href="#">TMPRSS13</a>  | transmembrane serine protease 13                                  |
| hsa-miR-100-5p | <a href="#">DESI2</a>     | desumoylating isopeptidase 2                                      |
| hsa-miR-100-5p | <a href="#">ZNRF2</a>     | zinc and ring finger 2                                            |
| hsa-miR-100-5p | <a href="#">RASA2</a>     | RAS p21 protein activator 2                                       |
| hsa-miR-100-5p | <a href="#">CAMTA1</a>    | calmodulin binding transcription activator 1                      |
| hsa-miR-100-5p | <a href="#">CDC25A</a>    | cell division cycle 25A                                           |
| hsa-miR-100-5p | <a href="#">TRIB1</a>     | tribbles pseudokinase 1                                           |
| hsa-miR-100-5p | <a href="#">CDYL2</a>     | chromodomain Y like 2                                             |
| hsa-miR-126-5p | <a href="#">HSPB8</a>     | heat shock protein family B (small) member 8                      |
| hsa-miR-126-5p | <a href="#">PDE7B</a>     | phosphodiesterase 7B                                              |
| hsa-miR-126-5p | <a href="#">FBXO6</a>     | F-box protein 6                                                   |
| hsa-miR-126-5p | <a href="#">TRMT9B</a>    | tRNA methyltransferase 9B (putative)                              |
| hsa-miR-126-5p | <a href="#">TNFAIP8L3</a> | TNF alpha induced protein 8 like 3                                |
| hsa-miR-126-5p | <a href="#">HOXB6</a>     | homeobox B6                                                       |
| hsa-miR-126-5p | <a href="#">GNE</a>       | glucosamine (UDP-N-acetyl)-2-epimerase/N-acetylmannosamine kinase |
| hsa-miR-126-5p | <a href="#">NAT1</a>      | N-acetyltransferase 1                                             |
| hsa-miR-126-5p | <a href="#">CASP9</a>     | caspase 9                                                         |
| hsa-miR-126-5p | <a href="#">TRIM8</a>     | tripartite motif containing 8                                     |
| hsa-miR-126-5p | <a href="#">TMEM182</a>   | transmembrane protein 182                                         |
| hsa-miR-126-5p | <a href="#">MR1</a>       | major histocompatibility complex, class I-related                 |
| hsa-miR-126-5p | <a href="#">ESRRG</a>     | estrogen related receptor gamma                                   |
| hsa-miR-126-5p | <a href="#">S1PR3</a>     | sphingosine-1-phosphate receptor 3                                |
| hsa-miR-126-5p | <a href="#">A2ML1</a>     | alpha-2-macroglobulin like 1                                      |
| hsa-miR-126-5p | <a href="#">MDM4</a>      | MDM4, p53 regulator                                               |
| hsa-miR-126-5p | <a href="#">BRWD3</a>     | bromodomain and WD repeat domain containing 3                     |
| hsa-miR-126-5p | <a href="#">RFX4</a>      | regulatory factor X4                                              |
| hsa-miR-126-5p | <a href="#">TRPS1</a>     | transcriptional repressor GATA binding 1                          |
| hsa-miR-126-5p | <a href="#">ARL11</a>     | ADP ribosylation factor like GTPase 11                            |
| hsa-miR-126-5p | <a href="#">FAM168A</a>   | family with sequence similarity 168 member A                      |
| hsa-miR-126-5p | <a href="#">CASK</a>      | calcium/calmodulin dependent serine protein kinase                |
| hsa-miR-126-5p | <a href="#">DENND1B</a>   | DENN domain containing 1B                                         |
| hsa-miR-126-5p | <a href="#">GRIK2</a>     | glutamate ionotropic receptor kainate type subunit 2              |
| hsa-miR-126-5p | <a href="#">TBCA</a>      | tubulin folding cofactor A                                        |
| hsa-miR-126-5p | <a href="#">HOXC8</a>     | homeobox C8                                                       |
| hsa-miR-126-5p | <a href="#">INPP5D</a>    | inositol polyphosphate-5-phosphatase D                            |
| hsa-miR-126-5p | <a href="#">CAMK2A</a>    | calcium/calmodulin dependent protein kinase II alpha              |
| hsa-miR-126-5p | <a href="#">GABRA4</a>    | gamma-aminobutyric acid type A receptor alpha4 subunit            |
| hsa-miR-126-5p | <a href="#">CD84</a>      | CD84 molecule                                                     |
| hsa-miR-126-5p | <a href="#">GGT6</a>      | gamma-glutamyltransferase 6                                       |
| hsa-miR-126-5p | <a href="#">TSC22D4</a>   | TSC22 domain family member 4                                      |
| hsa-miR-126-5p | <a href="#">MACC1</a>     | MET transcriptional regulator MACC1                               |
| hsa-miR-126-5p | <a href="#">GABRB2</a>    | gamma-aminobutyric acid type A receptor beta2 subunit             |

|                |                          |                                                      |
|----------------|--------------------------|------------------------------------------------------|
| hsa-miR-126-5p | <a href="#">RORA</a>     | RAR related orphan receptor A                        |
| hsa-miR-126-5p | <a href="#">MAP3K2</a>   | mitogen-activated protein kinase kinase kinase 2     |
| hsa-miR-126-5p | <a href="#">FGF7</a>     | fibroblast growth factor 7                           |
| hsa-miR-126-5p | <a href="#">CNTN1</a>    | contactin 1                                          |
| hsa-miR-126-5p | <a href="#">SETD9</a>    | SET domain containing 9                              |
| hsa-miR-126-5p | <a href="#">CHST11</a>   | carbohydrate sulfotransferase 11                     |
| hsa-miR-126-5p | <a href="#">PI15</a>     | peptidase inhibitor 15                               |
| hsa-miR-126-5p | <a href="#">VPS13A</a>   | vacuolar protein sorting 13 homolog A                |
| hsa-miR-126-5p | <a href="#">YIPF6</a>    | Yip1 domain family member 6                          |
| hsa-miR-126-5p | <a href="#">PNRC1</a>    | proline rich nuclear receptor coactivator 1          |
| hsa-miR-126-5p | <a href="#">MYEF2</a>    | myelin expression factor 2                           |
| hsa-miR-126-5p | <a href="#">KCNB1</a>    | potassium voltage-gated channel subfamily B member 1 |
| hsa-miR-126-5p | <a href="#">COMMD2</a>   | COMM domain containing 2                             |
| hsa-miR-126-5p | <a href="#">SHISAL1</a>  | shisa like 1                                         |
| hsa-miR-126-5p | <a href="#">FXN</a>      | frataxin                                             |
| hsa-miR-126-5p | <a href="#">TUBGCP4</a>  | tubulin gamma complex associated protein 4           |
| hsa-miR-126-5p | <a href="#">MMRN1</a>    | multimerin 1                                         |
| hsa-miR-126-5p | <a href="#">ZDHHC15</a>  | zinc finger DHHC-type containing 15                  |
| hsa-miR-126-5p | <a href="#">PKHD1</a>    | PKHD1, fibrocystin/polyductin                        |
| hsa-miR-126-5p | <a href="#">KIRREL1</a>  | kirre like nephrin family adhesion molecule 1        |
| hsa-miR-126-5p | <a href="#">STEAP2</a>   | STEAP2 metalloredutase                               |
| hsa-miR-126-5p | <a href="#">RABL3</a>    | RAB, member of RAS oncogene family like 3            |
| hsa-miR-126-5p | <a href="#">EBF1</a>     | EBF transcription factor 1                           |
| hsa-miR-126-5p | <a href="#">ZIC5</a>     | Zic family member 5                                  |
| hsa-miR-126-5p | <a href="#">DBNDD2</a>   | dysbindin domain containing 2                        |
| hsa-miR-126-5p | <a href="#">C5orf47</a>  | chromosome 5 open reading frame 47                   |
| hsa-miR-126-5p | <a href="#">ZBTB41</a>   | zinc finger and BTB domain containing 41             |
| hsa-miR-126-5p | <a href="#">SLC25A53</a> | solute carrier family 25 member 53                   |
| hsa-miR-126-5p | <a href="#">TSHZ3</a>    | teashirt zinc finger homeobox 3                      |
| hsa-miR-126-5p | <a href="#">TTF2</a>     | transcription termination factor 2                   |
| hsa-miR-126-5p | <a href="#">AMFR</a>     | autocrine motility factor receptor                   |
| hsa-miR-126-5p | <a href="#">SRSF12</a>   | serine and arginine rich splicing factor 12          |
| hsa-miR-126-5p | <a href="#">TECPR2</a>   | tectonin beta-propeller repeat containing 2          |
| hsa-miR-126-5p | <a href="#">ACAN</a>     | aggrecan                                             |
| hsa-miR-126-5p | <a href="#">SYT10</a>    | synaptotagmin 10                                     |
| hsa-miR-126-5p | <a href="#">ADH4</a>     | alcohol dehydrogenase 4 (class II), pi polypeptide   |
| hsa-miR-126-5p | <a href="#">VWC2</a>     | von Willebrand factor C domain containing 2          |
| hsa-miR-126-5p | <a href="#">RINL</a>     | Ras and Rab interactor like                          |
| hsa-miR-126-5p | <a href="#">NDUFS1</a>   | NADH:ubiquinone oxidoreductase core subunit S1       |
| hsa-miR-126-5p | <a href="#">NWD1</a>     | NACHT and WD repeat domain containing 1              |
| hsa-miR-126-5p | <a href="#">CHRNA5</a>   | cholinergic receptor nicotinic alpha 5 subunit       |
| hsa-miR-126-5p | <a href="#">EREG</a>     | epiregulin                                           |
| hsa-miR-126-5p | <a href="#">CCDC32</a>   | coiled-coil domain containing 32                     |
| hsa-miR-126-5p | <a href="#">TMEM41B</a>  | transmembrane protein 41B                            |
| hsa-miR-126-5p | <a href="#">GUCY1A2</a>  | guanylate cyclase 1 soluble subunit alpha 2          |

|                |                         |                                                                 |
|----------------|-------------------------|-----------------------------------------------------------------|
| hsa-miR-126-5p | <a href="#">RAB30</a>   | RAB30, member RAS oncogene family                               |
| hsa-miR-126-5p | <a href="#">WFDC13</a>  | WAP four-disulfide core domain 13                               |
| hsa-miR-126-5p | <a href="#">L2HGDH</a>  | L-2-hydroxyglutarate dehydrogenase                              |
| hsa-miR-126-5p | <a href="#">LDLRAD2</a> | low density lipoprotein receptor class A domain containing 2    |
| hsa-miR-126-5p | <a href="#">DLG1</a>    | discs large MAGUK scaffold protein 1                            |
| hsa-miR-126-5p | <a href="#">TBC1D15</a> | TBC1 domain family member 15                                    |
| hsa-miR-126-5p | <a href="#">TMEM56</a>  | transmembrane protein 56                                        |
| hsa-miR-126-5p | <a href="#">SULT6B1</a> | sulfotransferase family 6B member 1                             |
| hsa-miR-126-5p | <a href="#">PPFIA2</a>  | PTPRF interacting protein alpha 2                               |
| hsa-miR-126-5p | <a href="#">MEX3A</a>   | mex-3 RNA binding family member A                               |
| hsa-miR-126-5p | <a href="#">METTL17</a> | methyltransferase like 17                                       |
| hsa-miR-126-5p | <a href="#">FAM111A</a> | family with sequence similarity 111 member A                    |
| hsa-miR-126-5p | <a href="#">NCOA7</a>   | nuclear receptor coactivator 7                                  |
| hsa-miR-126-5p | <a href="#">C2CD4A</a>  | C2 calcium dependent domain containing 4A                       |
| hsa-miR-126-5p | <a href="#">SAMSN1</a>  | SAM domain, SH3 domain and nuclear localization signals 1       |
| hsa-miR-126-5p | <a href="#">MFAP4</a>   | microfibril associated protein 4                                |
| hsa-miR-126-5p | <a href="#">TRIP6</a>   | thyroid hormone receptor interactor 6                           |
| hsa-miR-126-5p | <a href="#">THAP3</a>   | THAP domain containing 3                                        |
| hsa-miR-126-5p | <a href="#">CHMP5</a>   | charged multivesicular body protein 5                           |
| hsa-miR-126-5p | <a href="#">SENPF7</a>  | SUMO specific peptidase 7                                       |
| hsa-miR-126-5p | <a href="#">NFIA</a>    | nuclear factor I A                                              |
| hsa-miR-126-5p | <a href="#">CCP110</a>  | centriolar coiled-coil protein 110                              |
| hsa-miR-126-5p | <a href="#">ELAVL4</a>  | ELAV like RNA binding protein 4                                 |
| hsa-miR-126-5p | <a href="#">SOX6</a>    | SRY-box 6                                                       |
| hsa-miR-126-5p | <a href="#">ADAM9</a>   | ADAM metallopeptidase domain 9                                  |
| hsa-miR-126-5p | <a href="#">ZNF135</a>  | zinc finger protein 135                                         |
| hsa-miR-126-5p | <a href="#">CHST7</a>   | carbohydrate sulfotransferase 7                                 |
| hsa-miR-126-5p | <a href="#">SRD5A3</a>  | steroid 5 alpha-reductase 3                                     |
| hsa-miR-126-5p | <a href="#">KL</a>      | klotho                                                          |
| hsa-miR-126-5p | <a href="#">VCIPI1</a>  | valosin containing protein interacting protein 1                |
| hsa-miR-126-5p | <a href="#">MAT2B</a>   | methionine adenosyltransferase 2B                               |
| hsa-miR-126-5p | <a href="#">NFAT5</a>   | nuclear factor of activated T cells 5                           |
| hsa-miR-126-5p | <a href="#">F9</a>      | coagulation factor IX                                           |
| hsa-miR-126-5p | <a href="#">JPH1</a>    | junctophilin 1                                                  |
| hsa-miR-126-5p | <a href="#">BICD2</a>   | BICD cargo adaptor 2                                            |
| hsa-miR-126-5p | <a href="#">FGD2</a>    | FYVE, RhoGEF and PH domain containing 2                         |
| hsa-miR-126-5p | <a href="#">LPP</a>     | LIM domain containing preferred translocation partner in lipoma |
| hsa-miR-126-5p | <a href="#">PCBD2</a>   | pterin-4 alpha-carbinolamine dehydratase 2                      |
| hsa-miR-126-5p | <a href="#">PTPN20</a>  | protein tyrosine phosphatase, non-receptor type 20              |
| hsa-miR-126-5p | <a href="#">ATP8B1</a>  | ATPase phospholipid transporting 8B1                            |
| hsa-miR-126-5p | <a href="#">MMP16</a>   | matrix metallopeptidase 16                                      |
| hsa-miR-126-5p | <a href="#">HECTD2</a>  | HECT domain E3 ubiquitin protein ligase 2                       |
| hsa-miR-126-5p | <a href="#">SYNPO2</a>  | synaptopodin 2                                                  |
| hsa-miR-126-5p | <a href="#">CCL28</a>   | C-C motif chemokine ligand 28                                   |
| hsa-miR-126-5p | <a href="#">CDCA7</a>   | cell division cycle associated 7                                |

|                |                              |                                                                          |
|----------------|------------------------------|--------------------------------------------------------------------------|
| hsa-miR-126-5p | <a href="#">NOVA1</a>        | NOVA alternative splicing regulator 1                                    |
| hsa-miR-126-5p | <a href="#">C8orf44-SGK3</a> | C8orf44-SGK3 readthrough                                                 |
| hsa-miR-126-5p | <a href="#">SGK3</a>         | serum/glucocorticoid regulated kinase family member 3                    |
| hsa-miR-126-5p | <a href="#">CAMK4</a>        | calcium/calmodulin dependent protein kinase IV                           |
| hsa-miR-126-5p | <a href="#">FRYL</a>         | FRY like transcription coactivator                                       |
| hsa-miR-126-5p | <a href="#">CCR1</a>         | C-C motif chemokine receptor 1                                           |
| hsa-miR-126-5p | <a href="#">NUP43</a>        | nucleoporin 43                                                           |
| hsa-miR-126-5p | <a href="#">FUT9</a>         | fucosyltransferase 9                                                     |
| hsa-miR-126-5p | <a href="#">SPAST</a>        | spastin                                                                  |
| hsa-miR-126-5p | <a href="#">CALHM1</a>       | calcium homeostasis modulator 1                                          |
| hsa-miR-126-5p | <a href="#">ARSK</a>         | arylsulfatase family member K                                            |
| hsa-miR-126-5p | <a href="#">MCTP1</a>        | multiple C2 and transmembrane domain containing 1                        |
| hsa-miR-126-5p | <a href="#">UBE2W</a>        | ubiquitin conjugating enzyme E2 W                                        |
| hsa-miR-126-5p | <a href="#">KCNN3</a>        | potassium calcium-activated channel subfamily N member 3                 |
| hsa-miR-126-5p | <a href="#">HNMT</a>         | histamine N-methyltransferase                                            |
| hsa-miR-126-5p | <a href="#">RFTN2</a>        | raftlin family member 2                                                  |
| hsa-miR-126-5p | <a href="#">PREX2</a>        | phosphatidylinositol-3,4,5-trisphosphate dependent Rac exchange factor 2 |
| hsa-miR-126-5p | <a href="#">HOXB5</a>        | homeobox B5                                                              |
| hsa-miR-126-5p | <a href="#">MAPK10</a>       | mitogen-activated protein kinase 10                                      |
| hsa-miR-126-5p | <a href="#">PROCR</a>        | protein C receptor                                                       |
| hsa-miR-126-5p | <a href="#">C5orf34</a>      | chromosome 5 open reading frame 34                                       |
| hsa-miR-126-5p | <a href="#">PDZD8</a>        | PDZ domain containing 8                                                  |
| hsa-miR-126-5p | <a href="#">ZNF695</a>       | zinc finger protein 695                                                  |
| hsa-miR-126-5p | <a href="#">ETV1</a>         | ETS variant 1                                                            |
| hsa-miR-126-5p | <a href="#">IDS</a>          | iduronate 2-sulfatase                                                    |
| hsa-miR-126-5p | <a href="#">SPATA2</a>       | spermatogenesis associated 2                                             |
| hsa-miR-126-5p | <a href="#">MBNL3</a>        | muscleblind like splicing regulator 3                                    |
| hsa-miR-126-5p | <a href="#">TET2</a>         | tet methylcytosine dioxygenase 2                                         |
| hsa-miR-126-5p | <a href="#">LONRF3</a>       | LON peptidase N-terminal domain and ring finger 3                        |
| hsa-miR-126-5p | <a href="#">HPS5</a>         | HPS5, biogenesis of lysosomal organelles complex 2 subunit 2             |
| hsa-miR-126-5p | <a href="#">CYP7B1</a>       | cytochrome P450 family 7 subfamily B member 1                            |
| hsa-miR-126-5p | <a href="#">ZNF703</a>       | zinc finger protein 703                                                  |
| hsa-miR-126-5p | <a href="#">NCAN</a>         | neurocan                                                                 |
| hsa-miR-126-5p | <a href="#">EDA2R</a>        | ectodysplasin A2 receptor                                                |
| hsa-miR-126-5p | <a href="#">SLC49A4</a>      | solute carrier family 49 member 4                                        |
| hsa-miR-126-5p | <a href="#">DTD1</a>         | D-tyrosyl-tRNA deacylase 1                                               |
| hsa-miR-126-5p | <a href="#">DHX35</a>        | DEAH-box helicase 35                                                     |
| hsa-miR-126-5p | <a href="#">AMACR</a>        | alpha-methylacyl-CoA racemase                                            |
| hsa-miR-126-5p | <a href="#">MDH1</a>         | malate dehydrogenase 1                                                   |
| hsa-miR-126-5p | <a href="#">SETBP1</a>       | SET binding protein 1                                                    |
| hsa-miR-126-5p | <a href="#">CCDC13</a>       | coiled-coil domain containing 13                                         |
| hsa-miR-126-5p | <a href="#">USP14</a>        | ubiquitin specific peptidase 14                                          |
| hsa-miR-126-5p | <a href="#">CLEC1A</a>       | C-type lectin domain family 1 member A                                   |
| hsa-miR-126-5p | <a href="#">PLCB1</a>        | phospholipase C beta 1                                                   |

|                |                            |                                                                           |
|----------------|----------------------------|---------------------------------------------------------------------------|
| hsa-miR-126-5p | <a href="#">RGR</a>        | retinal G protein coupled receptor                                        |
| hsa-miR-126-5p | <a href="#">GLYAT</a>      | glycine-N-acyltransferase                                                 |
| hsa-miR-126-5p | <a href="#">MGAT3</a>      | mannosyl (beta-1,4)-glycoprotein beta-1,4-N-acetylglucosaminyltransferase |
| hsa-miR-126-5p | <a href="#">TRPC5</a>      | transient receptor potential cation channel subfamily C member 5          |
| hsa-miR-126-5p | <a href="#">JARID2</a>     | jumonji and AT-rich interaction domain containing 2                       |
| hsa-miR-126-5p | <a href="#">DYRK2</a>      | dual specificity tyrosine phosphorylation regulated kinase 2              |
| hsa-miR-126-5p | <a href="#">ERGIC2</a>     | ERGIC and golgi 2                                                         |
| hsa-miR-126-5p | <a href="#">PSMA1</a>      | proteasome subunit alpha 1                                                |
| hsa-miR-126-5p | <a href="#">ADGRB3</a>     | adhesion G protein-coupled receptor B3                                    |
| hsa-miR-126-5p | <a href="#">TERB2</a>      | telomere repeat binding bouquet formation protein 2                       |
| hsa-miR-126-5p | <a href="#">ARL5A</a>      | ADP ribosylation factor like GTPase 5A                                    |
| hsa-miR-126-5p | <a href="#">ZNF687</a>     | zinc finger protein 687                                                   |
| hsa-miR-126-5p | <a href="#">GRIK1</a>      | glutamate ionotropic receptor kainate type subunit 1                      |
| hsa-miR-126-5p | <a href="#">RWDD4</a>      | RWD domain containing 4                                                   |
| hsa-miR-126-5p | <a href="#">CELF2</a>      | CUGBP Elav-like family member 2                                           |
| hsa-miR-126-5p | <a href="#">SH3BGR</a>     | SH3 domain binding glutamate rich protein                                 |
| hsa-miR-126-5p | <a href="#">AP3B1</a>      | adaptor related protein complex 3 subunit beta 1                          |
| hsa-miR-126-5p | <a href="#">SLC7A14</a>    | solute carrier family 7 member 14                                         |
| hsa-miR-126-5p | <a href="#">GABRA1</a>     | gamma-aminobutyric acid type A receptor alpha1 subunit                    |
| hsa-miR-126-5p | <a href="#">CCDC186</a>    | coiled-coil domain containing 186                                         |
| hsa-miR-126-5p | <a href="#">HOXB2</a>      | homeobox B2                                                               |
| hsa-miR-126-5p | <a href="#">BLZF1</a>      | basic leucine zipper nuclear factor 1                                     |
| hsa-miR-126-5p | <a href="#">HOXA13</a>     | homeobox A13                                                              |
| hsa-miR-126-5p | <a href="#">MCHR2</a>      | melanin concentrating hormone receptor 2                                  |
| hsa-miR-126-5p | <a href="#">SCEL</a>       | sciellin                                                                  |
| hsa-miR-126-5p | <a href="#">WRB-SH3BGR</a> | WRB-SH3BGR readthrough                                                    |
| hsa-miR-126-5p | <a href="#">OPRT</a>       | quinolinate phosphoribosyltransferase                                     |
| hsa-miR-126-5p | <a href="#">NFXL1</a>      | nuclear transcription factor, X-box binding like 1                        |
| hsa-miR-126-5p | <a href="#">CNOT4</a>      | CCR4-NOT transcription complex subunit 4                                  |
| hsa-miR-126-5p | <a href="#">KMT5A</a>      | lysine methyltransferase 5A                                               |
| hsa-miR-126-5p | <a href="#">QRSL1</a>      | QRSL1, glutaminyl-tRNA amidotransferase subunit A                         |
| hsa-miR-126-5p | <a href="#">GASK1B</a>     | golgi associated kinase 1B                                                |
| hsa-miR-126-5p | <a href="#">RECK</a>       | reversion inducing cysteine rich protein with kazal motifs                |
| hsa-miR-126-5p | <a href="#">WDHD1</a>      | WD repeat and HMG-box DNA binding protein 1                               |
| hsa-miR-126-5p | <a href="#">PDLIM5</a>     | PDZ and LIM domain 5                                                      |
| hsa-miR-126-5p | <a href="#">RASA2</a>      | RAS p21 protein activator 2                                               |
| hsa-miR-126-5p | <a href="#">PIAS2</a>      | protein inhibitor of activated STAT 2                                     |
| hsa-miR-126-5p | <a href="#">CDC14B</a>     | cell division cycle 14B                                                   |
| hsa-miR-126-5p | <a href="#">AK2</a>        | adenylate kinase 2                                                        |
| hsa-miR-126-5p | <a href="#">ERICH4</a>     | glutamate rich 4                                                          |
| hsa-miR-126-5p | <a href="#">CHIC1</a>      | cysteine rich hydrophobic domain 1                                        |
| hsa-miR-126-5p | <a href="#">KRAS</a>       | KRAS proto-oncogene, GTPase                                               |
| hsa-miR-126-5p | <a href="#">KLHL32</a>     | kelch like family member 32                                               |
| hsa-miR-126-5p | <a href="#">ABCA5</a>      | ATP binding cassette subfamily A member 5                                 |



|                |                             |                                                    |
|----------------|-----------------------------|----------------------------------------------------|
| hsa-miR-126-5p | <a href="#">SHISA3</a>      | shisa family member 3                              |
| hsa-miR-126-5p | <a href="#">SLC2A11</a>     | solute carrier family 2 member 11                  |
| hsa-miR-126-5p | <a href="#">SRFBP1</a>      | serum response factor binding protein 1            |
| hsa-miR-126-5p | <a href="#">BDH2</a>        | 3-hydroxybutyrate dehydrogenase 2                  |
| hsa-miR-126-5p | <a href="#">EGFL6</a>       | EGF like domain multiple 6                         |
| hsa-miR-126-5p | <a href="#">GRM8</a>        | glutamate metabotropic receptor 8                  |
| hsa-miR-126-5p | <a href="#">PTPN12</a>      | protein tyrosine phosphatase, non-receptor type 12 |
| hsa-miR-126-5p | <a href="#">RP2</a>         | RP2, ARL3 GTPase activating protein                |
| hsa-miR-126-5p | <a href="#">KAT2B</a>       | lysine acetyltransferase 2B                        |
| hsa-miR-126-5p | <a href="#">EIF4A2</a>      | eukaryotic translation initiation factor 4A2       |
| hsa-miR-126-5p | <a href="#">SF3A1</a>       | splicing factor 3a subunit 1                       |
| hsa-miR-126-5p | <a href="#">CSF1</a>        | colony stimulating factor 1                        |
| hsa-miR-126-5p | <a href="#">DGKI</a>        | diacylglycerol kinase iota                         |
| hsa-miR-126-5p | <a href="#">PWWP2A</a>      | PWWP domain containing 2A                          |
| hsa-miR-126-5p | <a href="#">IKZF2</a>       | IKAROS family zinc finger 2                        |
| hsa-miR-126-5p | <a href="#">RBM41</a>       | RNA binding motif protein 41                       |
| hsa-miR-126-5p | <a href="#">AHR</a>         | aryl hydrocarbon receptor                          |
| hsa-miR-126-5p | <a href="#">LRRTM3</a>      | leucine rich repeat transmembrane neuronal 3       |
| hsa-miR-126-5p | <a href="#">PHKB</a>        | phosphorylase kinase regulatory subunit beta       |
| hsa-miR-126-5p | <a href="#">HSD11B1</a>     | hydroxysteroid 11-beta dehydrogenase 1             |
| hsa-miR-126-5p | <a href="#">FPGT</a>        | fucose-1-phosphate guanylyltransferase             |
| hsa-miR-126-5p | <a href="#">DCAF13</a>      | DDB1 and CUL4 associated factor 13                 |
| hsa-miR-126-5p | <a href="#">ZNF33B</a>      | zinc finger protein 33B                            |
| hsa-miR-126-5p | <a href="#">FABP3</a>       | fatty acid binding protein 3                       |
| hsa-miR-126-5p | <a href="#">WASHC4</a>      | WASH complex subunit 4                             |
| hsa-miR-126-5p | <a href="#">GOSR1</a>       | golgi SNAP receptor complex member 1               |
| hsa-miR-126-5p | <a href="#">REPS2</a>       | RALBP1 associated Eps domain containing 2          |
| hsa-miR-126-5p | <a href="#">SP5</a>         | Sp5 transcription factor                           |
| hsa-miR-126-5p | <a href="#">MAATS1</a>      | MYCBP associated and testis expressed 1            |
| hsa-miR-126-5p | <a href="#">PAX2</a>        | paired box 2                                       |
| hsa-miR-126-5p | <a href="#">ABCD3</a>       | ATP binding cassette subfamily D member 3          |
| hsa-miR-126-5p | <a href="#">PATE1</a>       | prostate and testis expressed 1                    |
| hsa-miR-126-5p | <a href="#">CHURC1</a>      | churchill domain containing 1                      |
| hsa-miR-126-5p | <a href="#">TMEM33</a>      | transmembrane protein 33                           |
| hsa-miR-126-5p | <a href="#">SLC41A2</a>     | solute carrier family 41 member 2                  |
| hsa-miR-126-5p | <a href="#">PEX13</a>       | peroxisomal biogenesis factor 13                   |
| hsa-miR-126-5p | <a href="#">HYDIN</a>       | HYDIN, axonemal central pair apparatus protein     |
| hsa-miR-126-5p | <a href="#">PPP1R10</a>     | protein phosphatase 1 regulatory subunit 10        |
| hsa-miR-126-5p | <a href="#">FGG</a>         | fibrinogen gamma chain                             |
| hsa-miR-126-5p | <a href="#">PMS1</a>        | PMS1 homolog 1, mismatch repair system component   |
| hsa-miR-126-5p | <a href="#">ARID2</a>       | AT-rich interaction domain 2                       |
| hsa-miR-126-5p | <a href="#">TCHH</a>        | trichohyalin                                       |
| hsa-miR-126-5p | <a href="#">FMC1-LUC7L2</a> | FMC1-LUC7L2 readthrough                            |
| hsa-miR-126-5p | <a href="#">LUC7L2</a>      | LUC7 like 2, pre-mRNA splicing factor              |
| hsa-miR-126-5p | <a href="#">DLL4</a>        | delta like canonical Notch ligand 4                |



|                |                          |                                                                         |
|----------------|--------------------------|-------------------------------------------------------------------------|
| hsa-miR-126-5p | <a href="#">SSBP3</a>    | single stranded DNA binding protein 3                                   |
| hsa-miR-126-5p | <a href="#">C22orf39</a> | chromosome 22 open reading frame 39                                     |
| hsa-miR-126-5p | <a href="#">TRAF6</a>    | TNF receptor associated factor 6                                        |
| hsa-miR-126-5p | <a href="#">TRDN</a>     | triadin                                                                 |
| hsa-miR-126-5p | <a href="#">UTRN</a>     | utrophin                                                                |
| hsa-miR-126-5p | <a href="#">VWA8</a>     | von Willebrand factor A domain containing 8                             |
| hsa-miR-126-5p | <a href="#">PRPF8</a>    | pre-mRNA processing factor 8                                            |
| hsa-miR-126-5p | <a href="#">SEMA6D</a>   | semaphorin 6D                                                           |
| hsa-miR-126-5p | <a href="#">CSF2RA</a>   | colony stimulating factor 2 receptor alpha subunit                      |
| hsa-miR-126-5p | <a href="#">IPT2</a>     | Jupiter microtubule associated homolog 2                                |
| hsa-miR-126-5p | <a href="#">EPOR</a>     | erythropoietin receptor                                                 |
| hsa-miR-126-5p | <a href="#">C21orf91</a> | chromosome 21 open reading frame 91                                     |
| hsa-miR-126-5p | <a href="#">ZIC2</a>     | Zic family member 2                                                     |
| hsa-miR-126-5p | <a href="#">PF4</a>      | platelet factor 4                                                       |
| hsa-miR-126-5p | <a href="#">GMPPB</a>    | GDP-mannose pyrophosphorylase B                                         |
| hsa-miR-126-5p | <a href="#">FNDC9</a>    | fibronectin type III domain containing 9                                |
| hsa-miR-126-5p | <a href="#">TEP1</a>     | telomerase associated protein 1                                         |
| hsa-miR-126-5p | <a href="#">APOPT1</a>   | apoptogenic 1, mitochondrial                                            |
| hsa-miR-126-5p | <a href="#">THRB</a>     | thyroid hormone receptor beta                                           |
| hsa-miR-126-5p | <a href="#">PTGS2</a>    | prostaglandin-endoperoxide synthase 2                                   |
| hsa-miR-126-5p | <a href="#">HERC3</a>    | HECT and RLD domain containing E3 ubiquitin protein ligase 3            |
| hsa-miR-126-5p | <a href="#">EFR3A</a>    | EFR3 homolog A                                                          |
| hsa-miR-126-5p | <a href="#">GINS1</a>    | GINS complex subunit 1                                                  |
| hsa-miR-126-5p | <a href="#">PRAMEF2</a>  | PRAME family member 2                                                   |
| hsa-miR-126-5p | <a href="#">AIMP1</a>    | aminoacyl tRNA synthetase complex interacting multifunctional protein 1 |
| hsa-miR-126-5p | <a href="#">BCAP29</a>   | B cell receptor associated protein 29                                   |
| hsa-miR-126-5p | <a href="#">DENND6A</a>  | DENN domain containing 6A                                               |
| hsa-miR-126-5p | <a href="#">KIF14</a>    | kinesin family member 14                                                |
| hsa-miR-126-5p | <a href="#">NRG1</a>     | neuregulin 1                                                            |
| hsa-miR-126-5p | <a href="#">ICK</a>      | intestinal cell kinase                                                  |
| hsa-miR-126-5p | <a href="#">VPS13C</a>   | vacuolar protein sorting 13 homolog C                                   |
| hsa-miR-126-5p | <a href="#">CTNNA3</a>   | catenin alpha 3                                                         |
| hsa-miR-126-5p | <a href="#">KLHL7</a>    | kelch like family member 7                                              |
| hsa-miR-126-5p | <a href="#">LRRC74B</a>  | leucine rich repeat containing 74B                                      |
| hsa-miR-126-5p | <a href="#">UBA3</a>     | ubiquitin like modifier activating enzyme 3                             |
| hsa-miR-126-5p | <a href="#">MBLAC2</a>   | metallo-beta-lactamase domain containing 2                              |
| hsa-miR-126-5p | <a href="#">MED11</a>    | mediator complex subunit 11                                             |
| hsa-miR-126-5p | <a href="#">ANTXR2</a>   | ANTXR cell adhesion molecule 2                                          |
| hsa-miR-126-5p | <a href="#">ODR4</a>     | odr-4 GPCR localization factor homolog                                  |
| hsa-miR-126-5p | <a href="#">RGS5</a>     | regulator of G protein signaling 5                                      |
| hsa-miR-126-5p | <a href="#">PGAM4</a>    | phosphoglycerate mutase family member 4                                 |
| hsa-miR-126-5p | <a href="#">CACNB4</a>   | calcium voltage-gated channel auxiliary subunit beta 4                  |
| hsa-miR-126-5p | <a href="#">P2RY12</a>   | purinergic receptor P2Y12                                               |
| hsa-miR-126-5p | <a href="#">ZBTB20</a>   | zinc finger and BTB domain containing 20                                |

|                |                         |                                                              |
|----------------|-------------------------|--------------------------------------------------------------|
| hsa-miR-126-5p | <a href="#">ZNF333</a>  | zinc finger protein 333                                      |
| hsa-miR-126-5p | <a href="#">CALHM3</a>  | calcium homeostasis modulator 3                              |
| hsa-miR-126-5p | <a href="#">SLC16A7</a> | solute carrier family 16 member 7                            |
| hsa-miR-126-5p | <a href="#">KBTBD6</a>  | kelch repeat and BTB domain containing 6                     |
| hsa-miR-126-5p | <a href="#">IL7</a>     | interleukin 7                                                |
| hsa-miR-126-5p | <a href="#">PLAG1</a>   | PLAG1 zinc finger                                            |
| hsa-miR-126-5p | <a href="#">LTN1</a>    | listerin E3 ubiquitin protein ligase 1                       |
| hsa-miR-126-5p | <a href="#">PRKCA</a>   | protein kinase C alpha                                       |
| hsa-miR-126-5p | <a href="#">FSIP1</a>   | fibrous sheath interacting protein 1                         |
| hsa-miR-126-5p | <a href="#">GPBP1</a>   | GC-rich promoter binding protein 1                           |
| hsa-miR-126-5p | <a href="#">PHF23</a>   | PHD finger protein 23                                        |
| hsa-miR-126-5p | <a href="#">SLIT2</a>   | slit guidance ligand 2                                       |
| hsa-miR-126-5p | <a href="#">ARID1A</a>  | AT-rich interaction domain 1A                                |
| hsa-miR-126-5p | <a href="#">ANTXR1</a>  | ANTXR cell adhesion molecule 1                               |
| hsa-miR-126-5p | <a href="#">FAM8A1</a>  | family with sequence similarity 8 member A1                  |
| hsa-miR-126-5p | <a href="#">DLK1</a>    | delta like non-canonical Notch ligand 1                      |
| hsa-miR-126-5p | <a href="#">FAR2</a>    | fatty acyl-CoA reductase 2                                   |
| hsa-miR-126-5p | <a href="#">TMEM65</a>  | transmembrane protein 65                                     |
| hsa-miR-126-5p | <a href="#">EXD2</a>    | exonuclease 3'-5' domain containing 2                        |
| hsa-miR-126-5p | <a href="#">SLC26A7</a> | solute carrier family 26 member 7                            |
| hsa-miR-126-5p | <a href="#">ELK4</a>    | ELK4, ETS transcription factor                               |
| hsa-miR-126-5p | <a href="#">ELAVL3</a>  | ELAV like RNA binding protein 3                              |
| hsa-miR-126-5p | <a href="#">EPGN</a>    | epithelial mitogen                                           |
| hsa-miR-126-5p | <a href="#">ZBTB7C</a>  | zinc finger and BTB domain containing 7C                     |
| hsa-miR-126-5p | <a href="#">FAXC</a>    | failed axon connections homolog                              |
| hsa-miR-126-5p | <a href="#">UBN2</a>    | ubiquitin 2                                                  |
| hsa-miR-126-5p | <a href="#">PTPN4</a>   | protein tyrosine phosphatase, non-receptor type 4            |
| hsa-miR-126-5p | <a href="#">B4GALT4</a> | beta-1,4-galactosyltransferase 4                             |
| hsa-miR-126-5p | <a href="#">PPP6R3</a>  | protein phosphatase 6 regulatory subunit 3                   |
| hsa-miR-126-5p | <a href="#">GABRA5</a>  | gamma-aminobutyric acid type A receptor alpha5 subunit       |
| hsa-miR-126-5p | <a href="#">ZIC1</a>    | Zic family member 1                                          |
| hsa-miR-126-5p | <a href="#">MEF2D</a>   | myocyte enhancer factor 2D                                   |
| hsa-miR-126-5p | <a href="#">ZKSCAN8</a> | zinc finger with KRAB and SCAN domains 8                     |
| hsa-miR-126-5p | <a href="#">HMCN1</a>   | hemicentin 1                                                 |
| hsa-miR-126-5p | <a href="#">TCP10L2</a> | t-complex 10 like 2                                          |
| hsa-miR-126-5p | <a href="#">ST8SIA3</a> | ST8 alpha-N-acetyl-neuraminide alpha-2,8-sialyltransferase 3 |
| hsa-miR-126-5p | <a href="#">CYS1</a>    | cystin 1                                                     |
| hsa-miR-126-5p | <a href="#">GRIN2A</a>  | glutamate ionotropic receptor NMDA type subunit 2A           |
| hsa-miR-126-5p | <a href="#">TGFB1</a>   | transforming growth factor beta induced                      |
| hsa-miR-126-5p | <a href="#">CPEB4</a>   | cytoplasmic polyadenylation element binding protein 4        |
| hsa-miR-126-5p | <a href="#">L3MBTL4</a> | L3MBTL4, histone methyl-lysine binding protein               |
| hsa-miR-126-5p | <a href="#">SGPP1</a>   | sphingosine-1-phosphate phosphatase 1                        |
| hsa-miR-126-5p | <a href="#">IAH1</a>    | isoamyl acetate hydrolyzing esterase 1 (putative)            |
| hsa-miR-126-5p | <a href="#">ARL13B</a>  | ADP ribosylation factor like GTPase 13B                      |
| hsa-miR-126-5p | <a href="#">PPIF</a>    | peptidylprolyl isomerase F                                   |

|                |                          |                                                                          |
|----------------|--------------------------|--------------------------------------------------------------------------|
| hsa-miR-126-5p | <a href="#">CD2AP</a>    | CD2 associated protein                                                   |
| hsa-miR-126-5p | <a href="#">TRMT10A</a>  | tRNA methyltransferase 10A                                               |
| hsa-miR-126-5p | <a href="#">COLEC12</a>  | collectin subfamily member 12                                            |
| hsa-miR-126-5p | <a href="#">C17orf75</a> | chromosome 17 open reading frame 75                                      |
| hsa-miR-126-5p | <a href="#">DCDC2</a>    | doublecortin domain containing 2                                         |
| hsa-miR-126-5p | <a href="#">PNLIPRP3</a> | pancreatic lipase related protein 3                                      |
| hsa-miR-126-5p | <a href="#">FAM199X</a>  | family with sequence similarity 199, X-linked                            |
| hsa-miR-126-5p | <a href="#">IFI44</a>    | interferon induced protein 44                                            |
| hsa-miR-126-5p | <a href="#">LARP4</a>    | La ribonucleoprotein domain family member 4                              |
| hsa-miR-126-5p | <a href="#">ZNF10</a>    | zinc finger protein 10                                                   |
| hsa-miR-126-5p | <a href="#">MOG</a>      | myelin oligodendrocyte glycoprotein                                      |
| hsa-miR-126-5p | <a href="#">PGC</a>      | progastricsin                                                            |
| hsa-miR-126-5p | <a href="#">CUBN</a>     | cubilin                                                                  |
| hsa-miR-126-5p | <a href="#">OSTF1</a>    | osteoclast stimulating factor 1                                          |
| hsa-miR-126-5p | <a href="#">MSR1</a>     | macrophage scavenger receptor 1                                          |
| hsa-miR-126-5p | <a href="#">PPARGC1A</a> | PPARG coactivator 1 alpha                                                |
| hsa-miR-126-5p | <a href="#">COL11A1</a>  | collagen type XI alpha 1 chain                                           |
| hsa-miR-126-5p | <a href="#">DAPP1</a>    | dual adaptor of phosphotyrosine and 3-phosphoinositides 1                |
| hsa-miR-126-5p | <a href="#">NEGR1</a>    | neuronal growth regulator 1                                              |
| hsa-miR-126-5p | <a href="#">KRT78</a>    | keratin 78                                                               |
| hsa-miR-126-5p | <a href="#">SMCHD1</a>   | structural maintenance of chromosomes flexible hinge domain containing 1 |
| hsa-miR-126-5p | <a href="#">WNT3</a>     | Wnt family member 3                                                      |
| hsa-miR-126-5p | <a href="#">USP12</a>    | ubiquitin specific peptidase 12                                          |
| hsa-miR-126-5p | <a href="#">NACC2</a>    | NACC family member 2                                                     |
| hsa-miR-126-5p | <a href="#">LETM2</a>    | leucine zipper and EF-hand containing transmembrane protein 2            |
| hsa-miR-126-5p | <a href="#">GSK3B</a>    | glycogen synthase kinase 3 beta                                          |
| hsa-miR-126-5p | <a href="#">STX17</a>    | syntaxin 17                                                              |
| hsa-miR-126-5p | <a href="#">CDK19</a>    | cyclin dependent kinase 19                                               |
| hsa-miR-126-5p | <a href="#">FAM129A</a>  | family with sequence similarity 129 member A                             |
| hsa-miR-126-5p | <a href="#">PEX5L</a>    | peroxisomal biogenesis factor 5 like                                     |
| hsa-miR-126-5p | <a href="#">TGFBRI</a>   | transforming growth factor beta receptor 1                               |
| hsa-miR-126-5p | <a href="#">RSPO3</a>    | R-spondin 3                                                              |
| hsa-miR-126-5p | <a href="#">DNAJB4</a>   | DnaJ heat shock protein family (Hsp40) member B4                         |
| hsa-miR-126-5p | <a href="#">LRRC3B</a>   | leucine rich repeat containing 3B                                        |
| hsa-miR-126-5p | <a href="#">TANK</a>     | TRAF family member associated NFkB activator                             |
| hsa-miR-126-5p | <a href="#">PAN3</a>     | poly(A) specific ribonuclease subunit PAN3                               |
| hsa-miR-126-5p | <a href="#">LIN9</a>     | lin-9 DREAM MuvB core complex component                                  |
| hsa-miR-126-5p | <a href="#">GRB2</a>     | growth factor receptor bound protein 2                                   |
| hsa-miR-126-5p | <a href="#">DKK1</a>     | dickkopf WNT signaling pathway inhibitor 1                               |
| hsa-miR-126-5p | <a href="#">CTBS</a>     | chitinase                                                                |
| hsa-miR-126-5p | <a href="#">SPRY4</a>    | sprouty RTK signaling antagonist 4                                       |
| hsa-miR-126-5p | <a href="#">INAFM2</a>   | InaF motif containing 2                                                  |
| hsa-miR-126-5p | <a href="#">MAP3K13</a>  | mitogen-activated protein kinase kinase kinase 13                        |
| hsa-miR-126-5p | <a href="#">WASHC3</a>   | WASH complex subunit 3                                                   |

|                |                           |                                                                |
|----------------|---------------------------|----------------------------------------------------------------|
| hsa-miR-126-5p | <a href="#">EIF3J</a>     | eukaryotic translation initiation factor 3 subunit J           |
| hsa-miR-126-5p | <a href="#">LRCH2</a>     | leucine rich repeats and calponin homology domain containing 2 |
| hsa-miR-126-5p | <a href="#">CALCB</a>     | calcitonin related polypeptide beta                            |
| hsa-miR-126-5p | <a href="#">KPNA4</a>     | karyopherin subunit alpha 4                                    |
| hsa-miR-126-5p | <a href="#">UNC5D</a>     | unc-5 netrin receptor D                                        |
| hsa-miR-126-5p | <a href="#">DMBX1</a>     | diencephalon/mesencephalon homeobox 1                          |
| hsa-miR-126-5p | <a href="#">KCNV1</a>     | potassium voltage-gated channel modifier subfamily V member 1  |
| hsa-miR-126-5p | <a href="#">UGT2B17</a>   | UDP glucuronosyltransferase family 2 member B17                |
| hsa-miR-126-5p | <a href="#">MAN1A1</a>    | mannosidase alpha class 1A member 1                            |
| hsa-miR-126-5p | <a href="#">NXT2</a>      | nuclear transport factor 2 like export factor 2                |
| hsa-miR-126-5p | <a href="#">KIAA1549L</a> | KIAA1549 like                                                  |
| hsa-miR-126-5p | <a href="#">GPSM1</a>     | G protein signaling modulator 1                                |
| hsa-miR-126-5p | <a href="#">SLITRK4</a>   | SLIT and NTRK like family member 4                             |
| hsa-miR-126-5p | <a href="#">ODAPH</a>     | odontogenesis associated phosphoprotein                        |
| hsa-miR-126-5p | <a href="#">RGS4</a>      | regulator of G protein signaling 4                             |
| hsa-miR-126-5p | <a href="#">ITGB6</a>     | integrin subunit beta 6                                        |
| hsa-miR-126-5p | <a href="#">TAOK3</a>     | TAO kinase 3                                                   |
| hsa-miR-126-5p | <a href="#">NLK</a>       | nemo like kinase                                               |
| hsa-miR-126-5p | <a href="#">ZBTB18</a>    | zinc finger and BTB domain containing 18                       |
| hsa-miR-126-5p | <a href="#">ACVR2B</a>    | activin A receptor type 2B                                     |
| hsa-miR-126-5p | <a href="#">CREB1</a>     | cAMP responsive element binding protein 1                      |
| hsa-miR-126-5p | <a href="#">ENOX2</a>     | ecto-NOX disulfide-thiol exchanger 2                           |
| hsa-miR-126-5p | <a href="#">ADCYAP1</a>   | adenylate cyclase activating polypeptide 1                     |
| hsa-miR-126-5p | <a href="#">PRAMEF13</a>  | PRAME family member 13                                         |
| hsa-miR-126-5p | <a href="#">GLE1</a>      | GLE1, RNA export mediator                                      |
| hsa-miR-126-5p | <a href="#">TMX4</a>      | thioredoxin related transmembrane protein 4                    |
| hsa-miR-126-5p | <a href="#">FAM78A</a>    | family with sequence similarity 78 member A                    |
| hsa-miR-126-5p | <a href="#">RAB31</a>     | RAB31, member RAS oncogene family                              |
| hsa-miR-126-5p | <a href="#">WDR64</a>     | WD repeat domain 64                                            |
| hsa-miR-126-5p | <a href="#">PPP1R1C</a>   | protein phosphatase 1 regulatory inhibitor subunit 1C          |
| hsa-miR-126-5p | <a href="#">PRAMEF14</a>  | PRAME family member 14                                         |
| hsa-miR-126-5p | <a href="#">RSBN1</a>     | round spermatid basic protein 1                                |
| hsa-miR-126-5p | <a href="#">NHLRC2</a>    | NHL repeat containing 2                                        |
| hsa-miR-126-5p | <a href="#">PRAMEF1</a>   | PRAME family member 1                                          |
| hsa-miR-126-5p | <a href="#">ADGRG2</a>    | adhesion G protein-coupled receptor G2                         |
| hsa-miR-126-5p | <a href="#">ZDHHC20</a>   | zinc finger DHHC-type containing 20                            |
| hsa-miR-126-5p | <a href="#">CAVIN2</a>    | caveolae associated protein 2                                  |
| hsa-miR-126-5p | <a href="#">DPY19L2</a>   | dpy-19 like 2                                                  |
| hsa-miR-126-5p | <a href="#">KMT2A</a>     | lysine methyltransferase 2A                                    |
| hsa-miR-126-5p | <a href="#">NDUFAF3</a>   | NADH:ubiquinone oxidoreductase complex assembly factor 3       |
| hsa-miR-126-5p | <a href="#">LRRC8D</a>    | leucine rich repeat containing 8 VRAC subunit D                |
| hsa-miR-126-5p | <a href="#">HPSE</a>      | heparanase                                                     |
| hsa-miR-126-5p | <a href="#">DICER1</a>    | dicer 1, ribonuclease III                                      |
| hsa-miR-126-5p | <a href="#">OCLN</a>      | occludin                                                       |
| hsa-miR-126-5p | <a href="#">IMPAD1</a>    | inositol monophosphatase domain containing 1                   |

|                |                              |                                                                          |
|----------------|------------------------------|--------------------------------------------------------------------------|
| hsa-miR-126-5p | <a href="#">MLPH</a>         | melanophilin                                                             |
| hsa-miR-126-5p | <a href="#">EPS15</a>        | epidermal growth factor receptor pathway substrate 15                    |
| hsa-miR-126-5p | <a href="#">UHRF1BP1L</a>    | UHRF1 binding protein 1 like                                             |
| hsa-miR-126-5p | <a href="#">CA1</a>          | carbonic anhydrase 1                                                     |
| hsa-miR-126-5p | <a href="#">RXFP1</a>        | relaxin family peptide receptor 1                                        |
| hsa-miR-126-5p | <a href="#">XIRP2</a>        | xin actin binding repeat containing 2                                    |
| hsa-miR-126-5p | <a href="#">PLIN1</a>        | perilipin 1                                                              |
| hsa-miR-126-5p | <a href="#">RTN4RL1</a>      | reticulon 4 receptor like 1                                              |
| hsa-miR-126-5p | <a href="#">FRMPD4</a>       | FERM and PDZ domain containing 4                                         |
| hsa-miR-126-5p | <a href="#">USP10</a>        | ubiquitin specific peptidase 10                                          |
| hsa-miR-126-5p | <a href="#">SLC19A2</a>      | solute carrier family 19 member 2                                        |
| hsa-miR-126-5p | <a href="#">PRXL2A</a>       | peroxiredoxin like 2A                                                    |
| hsa-miR-126-5p | <a href="#">ZNF33A</a>       | zinc finger protein 33A                                                  |
| hsa-miR-126-5p | <a href="#">MORC1</a>        | MORC family CW-type zinc finger 1                                        |
| hsa-miR-126-5p | <a href="#">MMS22L</a>       | MMS22 like, DNA repair protein                                           |
| hsa-miR-126-5p | <a href="#">PCDH7</a>        | protocadherin 7                                                          |
| hsa-miR-126-5p | <a href="#">HPN</a>          | hepsin                                                                   |
| hsa-miR-126-5p | <a href="#">UBE3C</a>        | ubiquitin protein ligase E3C                                             |
| hsa-miR-126-5p | <a href="#">C6orf136</a>     | chromosome 6 open reading frame 136                                      |
| hsa-miR-126-5p | <a href="#">AHCTF1</a>       | AT-hook containing transcription factor 1                                |
| hsa-miR-126-5p | <a href="#">COMMD10</a>      | COMM domain containing 10                                                |
| hsa-miR-126-5p | <a href="#">WDR5B</a>        | WD repeat domain 5B                                                      |
| hsa-miR-126-5p | <a href="#">BRAT1</a>        | BRCA1 associated ATM activator 1                                         |
| hsa-miR-126-5p | <a href="#">CHMP3</a>        | charged multivesicular body protein 3                                    |
| hsa-miR-126-5p | <a href="#">MSRB3</a>        | methionine sulfoxide reductase B3                                        |
| hsa-miR-126-5p | <a href="#">TAF9</a>         | TATA-box binding protein associated factor 9                             |
| hsa-miR-126-5p | <a href="#">GTF2F1</a>       | general transcription factor IIF subunit 1                               |
| hsa-miR-126-5p | <a href="#">SLC6A15</a>      | solute carrier family 6 member 15                                        |
| hsa-miR-126-5p | <a href="#">ANKRD20A1</a>    | ankyrin repeat domain 20 family member A1                                |
| hsa-miR-126-5p | <a href="#">HMGXB4</a>       | HMG-box containing 4                                                     |
| hsa-miR-126-5p | <a href="#">SNRPN</a>        | small nuclear ribonucleoprotein polypeptide N                            |
| hsa-miR-126-5p | <a href="#">LONRF2</a>       | LON peptidase N-terminal domain and ring finger 2                        |
| hsa-miR-126-5p | <a href="#">CCDC149</a>      | coiled-coil domain containing 149                                        |
| hsa-miR-126-5p | <a href="#">TNFSF4</a>       | TNF superfamily member 4                                                 |
| hsa-miR-126-5p | <a href="#">SOGA1</a>        | suppressor of glucose, autophagy associated 1                            |
| hsa-miR-126-5p | <a href="#">CCNT2</a>        | cyclin T2                                                                |
| hsa-miR-126-5p | <a href="#">NF1</a>          | neurofibromin 1                                                          |
| hsa-miR-126-5p | <a href="#">AASDHPPT</a>     | amino adipate-semialdehyde dehydrogenase-phosphopantetheinyl transferase |
| hsa-miR-126-5p | <a href="#">ANKRD20A4</a>    | ankyrin repeat domain 20 family member A4                                |
| hsa-miR-126-5p | <a href="#">RNF103-CHMP3</a> | RNF103-CHMP3 readthrough                                                 |
| hsa-miR-126-5p | <a href="#">POFUT1</a>       | protein O-fucosyltransferase 1                                           |
| hsa-miR-126-5p | <a href="#">MINDY2</a>       | MINDY lysine 48 deubiquitinase 2                                         |
| hsa-miR-126-5p | <a href="#">DUSP28</a>       | dual specificity phosphatase 28                                          |
| hsa-miR-126-5p | <a href="#">MAP3K7</a>       | mitogen-activated protein kinase kinase kinase 7                         |

|                |                              |                                                         |
|----------------|------------------------------|---------------------------------------------------------|
| hsa-miR-126-5p | <a href="#">ANKRD20A2</a>    | ankyrin repeat domain 20 family member A2               |
| hsa-miR-126-5p | <a href="#">C21orf62</a>     | chromosome 21 open reading frame 62                     |
| hsa-miR-126-5p | <a href="#">RASEF</a>        | RAS and EF-hand domain containing                       |
| hsa-miR-126-5p | <a href="#">NXT1</a>         | nuclear transport factor 2 like export factor 1         |
| hsa-miR-126-5p | <a href="#">SMS</a>          | spermine synthase                                       |
| hsa-miR-126-5p | <a href="#">REG3G</a>        | regenerating family member 3 gamma                      |
| hsa-miR-126-5p | <a href="#">MINAR1</a>       | membrane integral NOTCH2 associated receptor 1          |
| hsa-miR-126-5p | <a href="#">CHUK</a>         | conserved helix-loop-helix ubiquitous kinase            |
| hsa-miR-126-5p | <a href="#">STARD4</a>       | StAR related lipid transfer domain containing 4         |
| hsa-miR-126-5p | <a href="#">CLEC12B</a>      | C-type lectin domain family 12 member B                 |
| hsa-miR-126-5p | <a href="#">VGLL1</a>        | vestigial like family member 1                          |
| hsa-miR-126-5p | <a href="#">CCDC14</a>       | coiled-coil domain containing 14                        |
| hsa-miR-126-5p | <a href="#">CDK13</a>        | cyclin dependent kinase 13                              |
| hsa-miR-126-5p | <a href="#">IFFO1</a>        | intermediate filament family orphan 1                   |
| hsa-miR-126-5p | <a href="#">STRN</a>         | striatin                                                |
| hsa-miR-126-5p | <a href="#">AKAP4</a>        | A-kinase anchoring protein 4                            |
| hsa-miR-126-5p | <a href="#">GATA3</a>        | GATA binding protein 3                                  |
| hsa-miR-126-5p | <a href="#">ZFAND5</a>       | zinc finger AN1-type containing 5                       |
| hsa-miR-126-5p | <a href="#">CASP3</a>        | caspase 3                                               |
| hsa-miR-126-5p | <a href="#">STK17B</a>       | serine/threonine kinase 17b                             |
| hsa-miR-126-5p | <a href="#">PHC3</a>         | polyhomeotic homolog 3                                  |
| hsa-miR-126-5p | <a href="#">TMEM266</a>      | transmembrane protein 266                               |
| hsa-miR-126-5p | <a href="#">LMO4</a>         | LIM domain only 4                                       |
| hsa-miR-126-5p | <a href="#">C2orf69</a>      | chromosome 2 open reading frame 69                      |
| hsa-miR-126-5p | <a href="#">TOB1</a>         | transducer of ERBB2, 1                                  |
| hsa-miR-126-5p | <a href="#">NR1D2</a>        | nuclear receptor subfamily 1 group D member 2           |
| hsa-miR-126-5p | <a href="#">SFRP4</a>        | secreted frizzled related protein 4                     |
| hsa-miR-126-5p | <a href="#">NUDT12</a>       | nudix hydrolase 12                                      |
| hsa-miR-126-5p | <a href="#">PHLPP1</a>       | PH domain and leucine rich repeat protein phosphatase 1 |
| hsa-miR-126-5p | <a href="#">NHSL1</a>        | NHS like 1                                              |
| hsa-miR-126-5p | <a href="#">IL17D</a>        | interleukin 17D                                         |
| hsa-miR-126-5p | <a href="#">ASCC3</a>        | activating signal cointegrator 1 complex subunit 3      |
| hsa-miR-126-5p | <a href="#">BAIAP2L1</a>     | BAI1 associated protein 2 like 1                        |
| hsa-miR-126-5p | <a href="#">FGF2</a>         | fibroblast growth factor 2                              |
| hsa-miR-126-5p | <a href="#">SELENOT</a>      | selenoprotein T                                         |
| hsa-miR-126-5p | <a href="#">LACC1</a>        | laccase domain containing 1                             |
| hsa-miR-126-5p | <a href="#">LOC100130451</a> | uncharacterized LOC100130451                            |
| hsa-miR-126-5p | <a href="#">TFEC</a>         | transcription factor EC                                 |
| hsa-miR-126-5p | <a href="#">POLR2K</a>       | RNA polymerase II subunit K                             |
| hsa-miR-126-5p | <a href="#">ASTN1</a>        | astrotactin 1                                           |
| hsa-miR-126-5p | <a href="#">GAS2L3</a>       | growth arrest specific 2 like 3                         |
| hsa-miR-126-5p | <a href="#">TMEM209</a>      | transmembrane protein 209                               |
| hsa-miR-126-5p | <a href="#">GALNT4</a>       | polypeptide N-acetylgalactosaminyltransferase 4         |
| hsa-miR-126-5p | <a href="#">MED14</a>        | mediator complex subunit 14                             |
| hsa-miR-126-5p | <a href="#">FKTN</a>         | fukutin                                                 |



|                |                              |                                                                |
|----------------|------------------------------|----------------------------------------------------------------|
| hsa-miR-126-5p | <a href="#">KLF17</a>        | Kruppel like factor 17                                         |
| hsa-miR-126-5p | <a href="#">AFG1L</a>        | AFG1 like ATPase                                               |
| hsa-miR-126-5p | <a href="#">GRIA2</a>        | glutamate ionotropic receptor AMPA type subunit 2              |
| hsa-miR-126-5p | <a href="#">USP47</a>        | ubiquitin specific peptidase 47                                |
| hsa-miR-126-5p | <a href="#">ZRANB1</a>       | zinc finger RANBP2-type containing 1                           |
| hsa-miR-126-5p | <a href="#">SSX2IP</a>       | SSX family member 2 interacting protein                        |
| hsa-miR-126-5p | <a href="#">POC1B-GALNT4</a> | POC1B-GALNT4 readthrough                                       |
| hsa-miR-126-5p | <a href="#">SYS1</a>         | SYS1, golgi trafficking protein                                |
| hsa-miR-126-5p | <a href="#">DAP3</a>         | death associated protein 3                                     |
| hsa-miR-126-5p | <a href="#">NSL1</a>         | NSL1, MIS12 kinetochore complex component                      |
| hsa-miR-126-5p | <a href="#">NCAPH</a>        | non-SMC condensin I complex subunit H                          |
| hsa-miR-126-5p | <a href="#">CADM2</a>        | cell adhesion molecule 2                                       |
| hsa-miR-126-5p | <a href="#">C16orf72</a>     | chromosome 16 open reading frame 72                            |
| hsa-miR-126-5p | <a href="#">CEP126</a>       | centrosomal protein 126                                        |
| hsa-miR-126-5p | <a href="#">SLC35A3</a>      | solute carrier family 35 member A3                             |
| hsa-miR-126-5p | <a href="#">BMP3</a>         | bone morphogenetic protein 3                                   |
| hsa-miR-126-5p | <a href="#">FCHO2</a>        | FCH domain only 2                                              |
| hsa-miR-126-5p | <a href="#">TMEM59</a>       | transmembrane protein 59                                       |
| hsa-miR-126-5p | <a href="#">CRBN</a>         | cereblon                                                       |
| hsa-miR-126-5p | <a href="#">CADM1</a>        | cell adhesion molecule 1                                       |
| hsa-miR-126-5p | <a href="#">DBR1</a>         | debranching RNA lariats 1                                      |
| hsa-miR-126-5p | <a href="#">C11orf87</a>     | chromosome 11 open reading frame 87                            |
| hsa-miR-126-5p | <a href="#">ST8SIA4</a>      | ST8 alpha-N-acetyl-neuraminide alpha-2,8-sialyltransferase 4   |
| hsa-miR-126-5p | <a href="#">NAPG</a>         | NSF attachment protein gamma                                   |
| hsa-miR-126-5p | <a href="#">UPRT</a>         | uracil phosphoribosyltransferase homolog                       |
| hsa-miR-126-5p | <a href="#">CACNA1A</a>      | calcium voltage-gated channel subunit alpha1 A                 |
| hsa-miR-126-5p | <a href="#">SH3BGRL2</a>     | SH3 domain binding glutamate rich protein like 2               |
| hsa-miR-126-5p | <a href="#">ACER3</a>        | alkaline ceramidase 3                                          |
| hsa-miR-126-5p | <a href="#">EYA4</a>         | EYA transcriptional coactivator and phosphatase 4              |
| hsa-miR-126-5p | <a href="#">SLC25A15</a>     | solute carrier family 25 member 15                             |
| hsa-miR-126-5p | <a href="#">LRCH1</a>        | leucine rich repeats and calponin homology domain containing 1 |
| hsa-miR-126-5p | <a href="#">CEP170</a>       | centrosomal protein 170                                        |
| hsa-miR-126-5p | <a href="#">GPATCH2L</a>     | G-patch domain containing 2 like                               |
| hsa-miR-126-5p | <a href="#">PLEKHH2</a>      | pleckstrin homology, MyTH4 and FERM domain containing H2       |
| hsa-miR-126-5p | <a href="#">BTC</a>          | betacellulin                                                   |
| hsa-miR-126-5p | <a href="#">RASSF6</a>       | Ras association domain family member 6                         |
| hsa-miR-126-5p | <a href="#">MAP2</a>         | microtubule associated protein 2                               |
| hsa-miR-126-5p | <a href="#">PTPN22</a>       | protein tyrosine phosphatase, non-receptor type 22             |
| hsa-miR-126-5p | <a href="#">SMIM11B</a>      | small integral membrane protein 11B                            |
| hsa-miR-126-5p | <a href="#">C10orf126</a>    | chromosome 10 open reading frame 126                           |
| hsa-miR-126-5p | <a href="#">HOMEZ</a>        | homeobox and leucine zipper encoding                           |
| hsa-miR-126-5p | <a href="#">FBN2</a>         | fibrillin 2                                                    |
| hsa-miR-126-5p | <a href="#">GLIPR1</a>       | GLI pathogenesis related 1                                     |
| hsa-miR-126-5p | <a href="#">RO60</a>         | Ro60, Y RNA binding protein                                    |
| hsa-miR-126-5p | <a href="#">ATP1A2</a>       | ATPase Na+/K+ transporting subunit alpha 2                     |



|                |                          |                                                             |
|----------------|--------------------------|-------------------------------------------------------------|
| hsa-miR-126-5p | <a href="#">CERS6</a>    | ceramide synthase 6                                         |
| hsa-miR-126-5p | <a href="#">SOX13</a>    | SRY-box 13                                                  |
| hsa-miR-126-5p | <a href="#">C9orf72</a>  | chromosome 9 open reading frame 72                          |
| hsa-miR-126-5p | <a href="#">SDHAF3</a>   | succinate dehydrogenase complex assembly factor 3           |
| hsa-miR-126-5p | <a href="#">ZKSCAN4</a>  | zinc finger with KRAB and SCAN domains 4                    |
| hsa-miR-126-5p | <a href="#">IL36G</a>    | interleukin 36 gamma                                        |
| hsa-miR-126-5p | <a href="#">GFRAL</a>    | GDNF family receptor alpha like                             |
| hsa-miR-126-5p | <a href="#">TRIL</a>     | TLR4 interactor with leucine rich repeats                   |
| hsa-miR-126-5p | <a href="#">GRM7</a>     | glutamate metabotropic receptor 7                           |
| hsa-miR-126-5p | <a href="#">SMIM11A</a>  | small integral membrane protein 11A                         |
| hsa-miR-126-5p | <a href="#">ZNF148</a>   | zinc finger protein 148                                     |
| hsa-miR-126-5p | <a href="#">MYBL1</a>    | MYB proto-oncogene like 1                                   |
| hsa-miR-126-5p | <a href="#">CRLS1</a>    | cardiolipin synthase 1                                      |
| hsa-miR-126-5p | <a href="#">EIF4A3</a>   | eukaryotic translation initiation factor 4A3                |
| hsa-miR-126-5p | <a href="#">PLEKHB2</a>  | pleckstrin homology domain containing B2                    |
| hsa-miR-126-5p | <a href="#">HOOK3</a>    | hook microtubule tethering protein 3                        |
| hsa-miR-126-5p | <a href="#">IREB2</a>    | iron responsive element binding protein 2                   |
| hsa-miR-126-5p | <a href="#">CIAO2A</a>   | cytosolic iron-sulfur assembly component 2A                 |
| hsa-miR-126-5p | <a href="#">TNS2</a>     | tensin 2                                                    |
| hsa-miR-126-5p | <a href="#">TMTC1</a>    | transmembrane and tetratricopeptide repeat containing 1     |
| hsa-miR-126-5p | <a href="#">SS18L1</a>   | SS18L1, nBAF chromatin remodeling complex subunit           |
| hsa-miR-126-5p | <a href="#">EPHA5</a>    | EPH receptor A5                                             |
| hsa-miR-126-5p | <a href="#">CPED1</a>    | cadherin like and PC-esterase domain containing 1           |
| hsa-miR-126-5p | <a href="#">CDH20</a>    | cadherin 20                                                 |
| hsa-miR-126-5p | <a href="#">MSH4</a>     | mutS homolog 4                                              |
| hsa-miR-126-5p | <a href="#">MDGA2</a>    | MAM domain containing glycosylphosphatidylinositol anchor 2 |
| hsa-miR-126-5p | <a href="#">FXR1</a>     | FMR1 autosomal homolog 1                                    |
| hsa-miR-126-5p | <a href="#">GNL1</a>     | G protein nucleolar 1 (putative)                            |
| hsa-miR-126-5p | <a href="#">NCK1</a>     | NCK adaptor protein 1                                       |
| hsa-miR-126-5p | <a href="#">GUCY1A1</a>  | guanylate cyclase 1 soluble subunit alpha 1                 |
| hsa-miR-126-5p | <a href="#">HSPA4L</a>   | heat shock protein family A (Hsp70) member 4 like           |
| hsa-miR-126-5p | <a href="#">MARCH3</a>   | membrane associated ring-CH-type finger 3                   |
| hsa-miR-126-5p | <a href="#">PPP1R12B</a> | protein phosphatase 1 regulatory subunit 12B                |
| hsa-miR-126-5p | <a href="#">PDZRN4</a>   | PDZ domain containing ring finger 4                         |
| hsa-miR-126-5p | <a href="#">IFT57</a>    | intraflagellar transport 57                                 |
| hsa-miR-126-5p | <a href="#">GRM5</a>     | glutamate metabotropic receptor 5                           |
| hsa-miR-126-5p | <a href="#">KIRREL2</a>  | kirre like nephrin family adhesion molecule 2               |
| hsa-miR-126-5p | <a href="#">ZBTB1</a>    | zinc finger and BTB domain containing 1                     |
| hsa-miR-126-5p | <a href="#">POLK</a>     | DNA polymerase kappa                                        |
| hsa-miR-126-5p | <a href="#">ZNF777</a>   | zinc finger protein 777                                     |
| hsa-miR-126-5p | <a href="#">TCTN1</a>    | tectonic family member 1                                    |
| hsa-miR-126-5p | <a href="#">RABGEF1</a>  | RAB guanine nucleotide exchange factor 1                    |
| hsa-miR-126-5p | <a href="#">FEM1B</a>    | fem-1 homolog B                                             |
| hsa-miR-126-5p | <a href="#">PTPN14</a>   | protein tyrosine phosphatase, non-receptor type 14          |
| hsa-miR-126-5p | <a href="#">NUDT7</a>    | nudix hydrolase 7                                           |

|                |                          |                                                     |
|----------------|--------------------------|-----------------------------------------------------|
| hsa-miR-126-5p | <a href="#">TTC7B</a>    | tetratricopeptide repeat domain 7B                  |
| hsa-miR-126-5p | <a href="#">HELZ</a>     | helicase with zinc finger                           |
| hsa-miR-126-5p | <a href="#">MYOZ3</a>    | myozenin 3                                          |
| hsa-miR-126-5p | <a href="#">SETD5</a>    | SET domain containing 5                             |
| hsa-miR-126-5p | <a href="#">GHR</a>      | growth hormone receptor                             |
| hsa-miR-126-5p | <a href="#">SMIM8</a>    | small integral membrane protein 8                   |
| hsa-miR-126-5p | <a href="#">RBM19</a>    | RNA binding motif protein 19                        |
| hsa-miR-126-5p | <a href="#">RPRD1A</a>   | regulation of nuclear pre-mRNA domain containing 1A |
| hsa-miR-126-5p | <a href="#">FYB1</a>     | FYN binding protein 1                               |
| hsa-miR-126-5p | <a href="#">EFCAB7</a>   | EF-hand calcium binding domain 7                    |
| hsa-miR-126-5p | <a href="#">PANK3</a>    | pantothenate kinase 3                               |
| hsa-miR-126-5p | <a href="#">TSHZ1</a>    | teashirt zinc finger homeobox 1                     |
| hsa-miR-126-5p | <a href="#">ZNF197</a>   | zinc finger protein 197                             |
| hsa-miR-126-5p | <a href="#">RCN2</a>     | reticulocalbin 2                                    |
| hsa-miR-126-5p | <a href="#">DIP2B</a>    | disco interacting protein 2 homolog B               |
| hsa-miR-126-5p | <a href="#">ESM1</a>     | endothelial cell specific molecule 1                |
| hsa-miR-126-5p | <a href="#">UBIAD1</a>   | UbiA prenyltransferase domain containing 1          |
| hsa-miR-126-5p | <a href="#">ABHD18</a>   | abhydrolase domain containing 18                    |
| hsa-miR-126-5p | <a href="#">E2F7</a>     | E2F transcription factor 7                          |
| hsa-miR-126-5p | <a href="#">WIPF2</a>    | WAS/WASL interacting protein family member 2        |
| hsa-miR-126-5p | <a href="#">ZNF208</a>   | zinc finger protein 208                             |
| hsa-miR-126-5p | <a href="#">TNFAIP2</a>  | TNF alpha induced protein 2                         |
| hsa-miR-126-5p | <a href="#">CHAMP1</a>   | chromosome alignment maintaining phosphoprotein 1   |
| hsa-miR-126-5p | <a href="#">PCDH10</a>   | protocadherin 10                                    |
| hsa-miR-126-5p | <a href="#">VAPA</a>     | VAMP associated protein A                           |
| hsa-miR-126-5p | <a href="#">PF4V1</a>    | platelet factor 4 variant 1                         |
| hsa-miR-126-5p | <a href="#">ZNF624</a>   | zinc finger protein 624                             |
| hsa-miR-126-5p | <a href="#">ADAMTSL1</a> | ADAMTS like 1                                       |
| hsa-miR-126-5p | <a href="#">DDIAS</a>    | DNA damage induced apoptosis suppressor             |
| hsa-miR-126-5p | <a href="#">MYD88</a>    | MYD88, innate immune signal transduction adaptor    |
| hsa-miR-126-5p | <a href="#">ASAH2B</a>   | N-acylsphingosine amidohydrolase 2B                 |
| hsa-miR-126-5p | <a href="#">DBF4</a>     | DBF4 zinc finger                                    |
| hsa-miR-126-5p | <a href="#">PHACTR2</a>  | phosphatase and actin regulator 2                   |
| hsa-miR-126-5p | <a href="#">ARHGAP20</a> | Rho GTPase activating protein 20                    |
| hsa-miR-126-5p | <a href="#">DCAF10</a>   | DDB1 and CUL4 associated factor 10                  |
| hsa-miR-126-5p | <a href="#">SYT14</a>    | synaptotagmin 14                                    |
| hsa-miR-126-5p | <a href="#">MRTFB</a>    | myocardin related transcription factor B            |
| hsa-miR-126-5p | <a href="#">WWC1</a>     | WW and C2 domain containing 1                       |
| hsa-miR-126-5p | <a href="#">NECAB1</a>   | N-terminal EF-hand calcium binding protein 1        |
| hsa-miR-126-5p | <a href="#">EFCAB11</a>  | EF-hand calcium binding domain 11                   |
| hsa-miR-126-5p | <a href="#">EVI2A</a>    | ecotropic viral integration site 2A                 |
| hsa-miR-126-5p | <a href="#">EXOC5</a>    | exocyst complex component 5                         |
| hsa-miR-126-5p | <a href="#">ASPH</a>     | aspartate beta-hydroxylase                          |
| hsa-miR-126-5p | <a href="#">SLC25A30</a> | solute carrier family 25 member 30                  |
| hsa-miR-126-5p | <a href="#">SNAI2</a>    | snail family transcriptional repressor 2            |

|                |                         |                                                             |
|----------------|-------------------------|-------------------------------------------------------------|
| hsa-miR-126-5p | <a href="#">SRGAP2B</a> | SLIT-ROBO Rho GTPase activating protein 2B                  |
| hsa-miR-126-5p | <a href="#">ANO5</a>    | anoctamin 5                                                 |
| hsa-miR-126-5p | <a href="#">METTL15</a> | methyltransferase like 15                                   |
| hsa-miR-126-5p | <a href="#">DNAJC3</a>  | DnaJ heat shock protein family (Hsp40) member C3            |
| hsa-miR-126-5p | <a href="#">MBOAT1</a>  | membrane bound O-acyltransferase domain containing 1        |
| hsa-miR-126-5p | <a href="#">PUS10</a>   | pseudouridine synthase 10                                   |
| hsa-miR-126-5p | <a href="#">ANGPTL1</a> | angiopoietin like 1                                         |
| hsa-miR-126-5p | <a href="#">JAG1</a>    | jagged 1                                                    |
| hsa-miR-126-5p | <a href="#">LRRC55</a>  | leucine rich repeat containing 55                           |
| hsa-miR-126-5p | <a href="#">ZNF224</a>  | zinc finger protein 224                                     |
| hsa-miR-126-5p | <a href="#">SNURF</a>   | SNRPN upstream reading frame                                |
| hsa-miR-126-5p | <a href="#">ZNF680</a>  | zinc finger protein 680                                     |
| hsa-miR-126-5p | <a href="#">PPP2R2B</a> | protein phosphatase 2 regulatory subunit Bbeta              |
| hsa-miR-126-5p | <a href="#">C3orf80</a> | chromosome 3 open reading frame 80                          |
| hsa-miR-126-5p | <a href="#">LAMTOR3</a> | late endosomal/lysosomal adaptor, MAPK and MTOR activator 3 |
| hsa-miR-126-5p | <a href="#">DPH6</a>    | diphthamine biosynthesis 6                                  |
| hsa-miR-126-5p | <a href="#">GCLM</a>    | glutamate-cysteine ligase modifier subunit                  |
| hsa-miR-126-5p | <a href="#">NLGN4Y</a>  | neuroligin 4 Y-linked                                       |
| hsa-miR-126-5p | <a href="#">GJB2</a>    | gap junction protein beta 2                                 |
| hsa-miR-126-5p | <a href="#">SMIM25</a>  | small integral membrane protein 25                          |
| hsa-miR-126-5p | <a href="#">ITGB3BP</a> | integrin subunit beta 3 binding protein                     |
| hsa-miR-126-5p | <a href="#">PTPRB</a>   | protein tyrosine phosphatase, receptor type B               |
| hsa-miR-126-5p | <a href="#">TGS1</a>    | trimethylguanosine synthase 1                               |
| hsa-miR-126-5p | <a href="#">SNX14</a>   | sorting nexin 14                                            |
| hsa-miR-126-5p | <a href="#">KCNMA1</a>  | potassium calcium-activated channel subfamily M alpha 1     |
| hsa-miR-126-5p | <a href="#">OGT</a>     | O-linked N-acetylglucosamine (GlcNAc) transferase           |
| hsa-miR-126-5p | <a href="#">MPC1</a>    | mitochondrial pyruvate carrier 1                            |
| hsa-miR-126-5p | <a href="#">COL12A1</a> | collagen type XII alpha 1 chain                             |
| hsa-miR-126-5p | <a href="#">RUNX1T1</a> | RUNX1 translocation partner 1                               |
| hsa-miR-126-5p | <a href="#">DAB2IP</a>  | DAB2 interacting protein                                    |
| hsa-miR-126-5p | <a href="#">FMO2</a>    | flavin containing monooxygenase 2                           |
| hsa-miR-126-5p | <a href="#">AP1G1</a>   | adaptor related protein complex 1 subunit gamma 1           |
| hsa-miR-126-5p | <a href="#">TMCO4</a>   | transmembrane and coiled-coil domains 4                     |
| hsa-miR-126-5p | <a href="#">BAG3</a>    | BCL2 associated athanogene 3                                |
| hsa-miR-126-5p | <a href="#">GPR88</a>   | G protein-coupled receptor 88                               |
| hsa-miR-126-5p | <a href="#">COBLL1</a>  | cordon-bleu WH2 repeat protein like 1                       |
| hsa-miR-126-5p | <a href="#">BARD1</a>   | BRCA1 associated RING domain 1                              |
| hsa-miR-126-5p | <a href="#">ABRA</a>    | actin binding Rho activating protein                        |
| hsa-miR-126-5p | <a href="#">CHCHD3</a>  | coiled-coil-helix-coiled-coil-helix domain containing 3     |
| hsa-miR-126-5p | <a href="#">HRH4</a>    | histamine receptor H4                                       |
| hsa-miR-126-5p | <a href="#">ADAMTS6</a> | ADAM metalloproteinase with thrombospondin type 1 motif 6   |
| hsa-miR-126-5p | <a href="#">ZNF354C</a> | zinc finger protein 354C                                    |
| hsa-miR-126-5p | <a href="#">ZNF407</a>  | zinc finger protein 407                                     |
| hsa-miR-126-5p | <a href="#">ANK3</a>    | ankyrin 3                                                   |
| hsa-miR-126-5p | <a href="#">EBPL</a>    | EBP like                                                    |

|                |                           |                                                             |
|----------------|---------------------------|-------------------------------------------------------------|
| hsa-miR-126-5p | <a href="#">LDB1</a>      | LIM domain binding 1                                        |
| hsa-miR-126-5p | <a href="#">C2</a>        | complement C2                                               |
| hsa-miR-126-5p | <a href="#">RBM26</a>     | RNA binding motif protein 26                                |
| hsa-miR-126-5p | <a href="#">SREK1</a>     | splicing regulatory glutamic acid and lysine rich protein 1 |
| hsa-miR-126-5p | <a href="#">AGTR2</a>     | angiotensin II receptor type 2                              |
| hsa-miR-126-5p | <a href="#">STC1</a>      | stanniocalcin 1                                             |
| hsa-miR-126-5p | <a href="#">CHD1L</a>     | chromodomain helicase DNA binding protein 1 like            |
| hsa-miR-126-5p | <a href="#">TSG101</a>    | tumor susceptibility 101                                    |
| hsa-miR-126-5p | <a href="#">SPOUT1</a>    | SPOUT domain containing methyltransferase 1                 |
| hsa-miR-126-5p | <a href="#">MIPOL1</a>    | mirror-image polydactyly 1                                  |
| hsa-miR-126-5p | <a href="#">ATG3</a>      | autophagy related 3                                         |
| hsa-miR-126-5p | <a href="#">SPATA6</a>    | spermatogenesis associated 6                                |
| hsa-miR-126-5p | <a href="#">RAB11FIP2</a> | RAB11 family interacting protein 2                          |
| hsa-miR-126-5p | <a href="#">DOCK7</a>     | dedicator of cytokinesis 7                                  |
| hsa-miR-126-5p | <a href="#">BRAF</a>      | B-Raf proto-oncogene, serine/threonine kinase               |
| hsa-miR-126-5p | <a href="#">MCTS1</a>     | MCTS1, re-initiation and release factor                     |
| hsa-miR-126-5p | <a href="#">TRAPPC13</a>  | trafficking protein particle complex 13                     |
| hsa-miR-126-5p | <a href="#">PCSK2</a>     | proprotein convertase subtilisin/kexin type 2               |
| hsa-miR-126-5p | <a href="#">PCLO</a>      | piccolo presynaptic cytomatrix protein                      |
| hsa-miR-126-5p | <a href="#">SCAP</a>      | SREBF chaperone                                             |
| hsa-miR-126-5p | <a href="#">SLC7A4</a>    | solute carrier family 7 member 4                            |
| hsa-miR-126-5p | <a href="#">PALM2</a>     | paralemmin 2                                                |
| hsa-miR-126-5p | <a href="#">ALDH1L2</a>   | aldehyde dehydrogenase 1 family member L2                   |
| hsa-miR-126-5p | <a href="#">AKIRIN1</a>   | akirin 1                                                    |
| hsa-miR-126-5p | <a href="#">MRPL57</a>    | mitochondrial ribosomal protein L57                         |
| hsa-miR-126-5p | <a href="#">POU2F1</a>    | POU class 2 homeobox 1                                      |
| hsa-miR-126-5p | <a href="#">AASS</a>      | aminoadipate-semialdehyde synthase                          |
| hsa-miR-126-5p | <a href="#">CALCRL</a>    | calcitonin receptor like receptor                           |
| hsa-miR-126-5p | <a href="#">CNEP1R1</a>   | CTD nuclear envelope phosphatase 1 regulatory subunit 1     |
| hsa-miR-126-5p | <a href="#">RAB22A</a>    | RAB22A, member RAS oncogene family                          |
| hsa-miR-126-5p | <a href="#">DNAH5</a>     | dynein axonemal heavy chain 5                               |
| hsa-miR-126-5p | <a href="#">PCSK5</a>     | proprotein convertase subtilisin/kexin type 5               |
| hsa-miR-126-5p | <a href="#">PPAT</a>      | phosphoribosyl pyrophosphate amidotransferase               |
| hsa-miR-126-5p | <a href="#">NR3C1</a>     | nuclear receptor subfamily 3 group C member 1               |
| hsa-miR-126-5p | <a href="#">GLCE</a>      | glucuronic acid epimerase                                   |
| hsa-miR-126-5p | <a href="#">NEUROG2</a>   | neurogenin 2                                                |
| hsa-miR-126-5p | <a href="#">RC3H1</a>     | ring finger and CCCH-type domains 1                         |
| hsa-miR-126-5p | <a href="#">PTPN11</a>    | protein tyrosine phosphatase, non-receptor type 11          |
| hsa-miR-126-5p | <a href="#">MCM5</a>      | minichromosome maintenance complex component 5              |
| hsa-miR-126-5p | <a href="#">CCDC179</a>   | coiled-coil domain containing 179                           |
| hsa-miR-126-5p | <a href="#">TTC9</a>      | tetratricopeptide repeat domain 9                           |
| hsa-miR-126-5p | <a href="#">GPATCH8</a>   | G-patch domain containing 8                                 |
| hsa-miR-126-5p | <a href="#">CDYL2</a>     | chromodomain Y like 2                                       |
| hsa-miR-126-5p | <a href="#">CLEC19A</a>   | C-type lectin domain containing 19A                         |
| hsa-miR-126-5p | <a href="#">SLC33A1</a>   | solute carrier family 33 member 1                           |

|                |                              |                                                                              |
|----------------|------------------------------|------------------------------------------------------------------------------|
| hsa-miR-126-5p | <a href="#">KIAA0355</a>     | KIAA0355                                                                     |
| hsa-miR-126-5p | <a href="#">EEF1AKMT2</a>    | EEF1A lysine methyltransferase 2                                             |
| hsa-miR-126-5p | <a href="#">TCEANC2</a>      | transcription elongation factor A N-terminal and central domain containing 2 |
| hsa-miR-126-5p | <a href="#">TET1</a>         | tet methylcytosine dioxygenase 1                                             |
| hsa-miR-126-5p | <a href="#">NDUFA5</a>       | NADH:ubiquinone oxidoreductase subunit A5                                    |
| hsa-miR-126-5p | <a href="#">DYNLT3</a>       | dynein light chain Tctex-type 3                                              |
| hsa-miR-126-5p | <a href="#">LRP1</a>         | LDL receptor related protein 1                                               |
| hsa-miR-126-5p | <a href="#">ZC3H12B</a>      | zinc finger CCCH-type containing 12B                                         |
| hsa-miR-126-5p | <a href="#">ZFC3H1</a>       | zinc finger C3H1-type containing                                             |
| hsa-miR-126-5p | <a href="#">USP45</a>        | ubiquitin specific peptidase 45                                              |
| hsa-miR-126-5p | <a href="#">TNIK</a>         | TRAF2 and NCK interacting kinase                                             |
| hsa-miR-126-5p | <a href="#">RHOBTB3</a>      | Rho related BTB domain containing 3                                          |
| hsa-miR-126-5p | <a href="#">DISC1</a>        | DISC1 scaffold protein                                                       |
| hsa-miR-126-5p | <a href="#">PLA2G12A</a>     | phospholipase A2 group X1IA                                                  |
| hsa-miR-126-5p | <a href="#">ANKIB1</a>       | ankyrin repeat and IBR domain containing 1                                   |
| hsa-miR-126-5p | <a href="#">FZD3</a>         | frizzled class receptor 3                                                    |
| hsa-miR-126-5p | <a href="#">KIF13A</a>       | kinesin family member 13A                                                    |
| hsa-miR-126-5p | <a href="#">NOX1</a>         | NADPH oxidase 1                                                              |
| hsa-miR-126-5p | <a href="#">HNRNPU</a>       | heterogeneous nuclear ribonucleoprotein U                                    |
| hsa-miR-126-5p | <a href="#">CRIPT</a>        | CXXC repeat containing interactor of PDZ3 domain                             |
| hsa-miR-126-5p | <a href="#">DTWD2</a>        | DTW domain containing 2                                                      |
| hsa-miR-126-5p | <a href="#">LOC100144595</a> | uncharacterized LOC100144595                                                 |
| hsa-miR-126-5p | <a href="#">SELENOI</a>      | selenoprotein I                                                              |
| hsa-miR-126-5p | <a href="#">IL1F10</a>       | interleukin 1 family member 10                                               |
| hsa-miR-126-5p | <a href="#">TMEM64</a>       | transmembrane protein 64                                                     |
| hsa-miR-126-5p | <a href="#">NFIB</a>         | nuclear factor I B                                                           |
| hsa-miR-126-5p | <a href="#">CR1</a>          | complement C3b/C4b receptor 1 (Knops blood group)                            |
| hsa-miR-126-5p | <a href="#">LPIN2</a>        | lipin 2                                                                      |
| hsa-miR-126-5p | <a href="#">CCDC88A</a>      | coiled-coil domain containing 88A                                            |
| hsa-miR-126-5p | <a href="#">ELOVL2</a>       | ELOVL fatty acid elongase 2                                                  |
| hsa-miR-126-5p | <a href="#">ZBTB7B</a>       | zinc finger and BTB domain containing 7B                                     |
| hsa-miR-126-5p | <a href="#">TIMM29</a>       | translocase of inner mitochondrial membrane 29                               |
| hsa-miR-126-5p | <a href="#">ZNF280D</a>      | zinc finger protein 280D                                                     |
| hsa-miR-126-5p | <a href="#">FLT1</a>         | fms related tyrosine kinase 1                                                |
| hsa-miR-126-5p | <a href="#">EPB41L4B</a>     | erythrocyte membrane protein band 4.1 like 4B                                |
| hsa-miR-126-5p | <a href="#">PPIL6</a>        | peptidylprolyl isomerase like 6                                              |
| hsa-miR-126-5p | <a href="#">FGF1</a>         | fibroblast growth factor 1                                                   |
| hsa-miR-126-5p | <a href="#">SLC25A12</a>     | solute carrier family 25 member 12                                           |
| hsa-miR-126-5p | <a href="#">RAPGEF3</a>      | Rap guanine nucleotide exchange factor 3                                     |
| hsa-miR-126-5p | <a href="#">FMN2</a>         | formin 2                                                                     |
| hsa-miR-126-5p | <a href="#">REEP3</a>        | receptor accessory protein 3                                                 |
| hsa-miR-126-5p | <a href="#">SLCO6A1</a>      | solute carrier organic anion transporter family member 6A1                   |
| hsa-miR-126-5p | <a href="#">ST6GALNAC5</a>   | ST6 N-acetylgalactosaminide alpha-2,6-sialyltransferase 5                    |
| hsa-miR-126-5p | <a href="#">TMEM19</a>       | transmembrane protein 19                                                     |

|                |                           |                                                                        |
|----------------|---------------------------|------------------------------------------------------------------------|
| hsa-miR-126-5p | <a href="#">ODF2L</a>     | outer dense fiber of sperm tails 2 like                                |
| hsa-miR-126-5p | <a href="#">SPCS3</a>     | signal peptidase complex subunit 3                                     |
| hsa-miR-126-5p | <a href="#">RGPD4</a>     | RANBP2-like and GRIP domain containing 4                               |
| hsa-miR-126-5p | <a href="#">HBP1</a>      | HMG-box transcription factor 1                                         |
| hsa-miR-126-5p | <a href="#">UTY</a>       | ubiquitously transcribed tetratricopeptide repeat containing, Y-linked |
| hsa-miR-126-5p | <a href="#">MED4</a>      | mediator complex subunit 4                                             |
| hsa-miR-126-5p | <a href="#">PHF14</a>     | PHD finger protein 14                                                  |
| hsa-miR-126-5p | <a href="#">MIGA1</a>     | mitoguardin 1                                                          |
| hsa-miR-126-5p | <a href="#">SLC4A10</a>   | solute carrier family 4 member 10                                      |
| hsa-miR-126-5p | <a href="#">SNX2</a>      | sorting nexin 2                                                        |
| hsa-miR-126-5p | <a href="#">ARPC3</a>     | actin related protein 2/3 complex subunit 3                            |
| hsa-miR-126-5p | <a href="#">PRTG</a>      | protogenin                                                             |
| hsa-miR-126-5p | <a href="#">TMX1</a>      | thioredoxin related transmembrane protein 1                            |
| hsa-miR-126-5p | <a href="#">SGIP1</a>     | SH3 domain GRB2 like endophilin interacting protein 1                  |
| hsa-miR-126-5p | <a href="#">RAB33B</a>    | RAB33B, member RAS oncogene family                                     |
| hsa-miR-126-5p | <a href="#">UMPS</a>      | uridine monophosphate synthetase                                       |
| hsa-miR-126-5p | <a href="#">SLC24A2</a>   | solute carrier family 24 member 2                                      |
| hsa-miR-126-5p | <a href="#">LYPLAL1</a>   | lysophospholipase like 1                                               |
| hsa-miR-126-5p | <a href="#">IPMK</a>      | inositol polyphosphate multikinase                                     |
| hsa-miR-126-5p | <a href="#">ADAMTS4</a>   | ADAM metalloproteinase with thrombospondin type 1 motif 4              |
| hsa-miR-126-5p | <a href="#">PITPNC1</a>   | phosphatidylinositol transfer protein cytoplasmic 1                    |
| hsa-miR-126-5p | <a href="#">DCLK1</a>     | doublecortin like kinase 1                                             |
| hsa-miR-126-5p | <a href="#">ZNF326</a>    | zinc finger protein 326                                                |
| hsa-miR-126-5p | <a href="#">UBE2V2</a>    | ubiquitin conjugating enzyme E2 V2                                     |
| hsa-miR-126-5p | <a href="#">TEAD1</a>     | TEA domain transcription factor 1                                      |
| hsa-miR-126-5p | <a href="#">RDH11</a>     | retinol dehydrogenase 11                                               |
| hsa-miR-126-5p | <a href="#">PSD3</a>      | pleckstrin and Sec7 domain containing 3                                |
| hsa-miR-126-5p | <a href="#">OTULIN</a>    | OTU deubiquitinase with linear linkage specificity                     |
| hsa-miR-126-5p | <a href="#">PDE9A</a>     | phosphodiesterase 9A                                                   |
| hsa-miR-126-5p | <a href="#">LZTFL1</a>    | leucine zipper transcription factor like 1                             |
| hsa-miR-126-5p | <a href="#">PANX1</a>     | pannexin 1                                                             |
| hsa-miR-126-5p | <a href="#">CYP4F2</a>    | cytochrome P450 family 4 subfamily F member 2                          |
| hsa-miR-126-5p | <a href="#">AFF4</a>      | AF4/FMR2 family member 4                                               |
| hsa-miR-126-5p | <a href="#">RGPD8</a>     | RANBP2-like and GRIP domain containing 8                               |
| hsa-miR-126-5p | <a href="#">TMEM170B</a>  | transmembrane protein 170B                                             |
| hsa-miR-126-5p | <a href="#">METTL25</a>   | methyltransferase like 25                                              |
| hsa-miR-126-5p | <a href="#">PSAT1</a>     | phosphoserine aminotransferase 1                                       |
| hsa-miR-126-5p | <a href="#">UGT8</a>      | UDP glycosyltransferase 8                                              |
| hsa-miR-126-5p | <a href="#">ANKRD20A3</a> | ankyrin repeat domain 20 family member A3                              |
| hsa-miR-126-5p | <a href="#">SMC2</a>      | structural maintenance of chromosomes 2                                |
| hsa-miR-126-5p | <a href="#">RGPD6</a>     | RANBP2-like and GRIP domain containing 6                               |
| hsa-miR-126-5p | <a href="#">TACO1</a>     | translational activator of cytochrome c oxidase I                      |
| hsa-miR-126-5p | <a href="#">ENPP5</a>     | ectonucleotide pyrophosphatase/phosphodiesterase 5 (putative)          |
| hsa-miR-126-5p | <a href="#">OTUD6B</a>    | OTU domain containing 6B                                               |
| hsa-miR-126-5p | <a href="#">SLC35G1</a>   | solute carrier family 35 member G1                                     |



|                |                          |                                                           |
|----------------|--------------------------|-----------------------------------------------------------|
| hsa-miR-126-5p | <a href="#">SH3TC2</a>   | SH3 domain and tetratricopeptide repeats 2                |
| hsa-miR-126-5p | <a href="#">NCOR1</a>    | nuclear receptor corepressor 1                            |
| hsa-miR-126-5p | <a href="#">DTX3L</a>    | deltex E3 ubiquitin ligase 3L                             |
| hsa-miR-126-5p | <a href="#">STAM2</a>    | signal transducing adaptor molecule 2                     |
| hsa-miR-126-5p | <a href="#">RGPD5</a>    | RANBP2-like and GRIP domain containing 5                  |
| hsa-miR-126-5p | <a href="#">MITF</a>     | melanocyte inducing transcription factor                  |
| hsa-miR-126-5p | <a href="#">FAM221A</a>  | family with sequence similarity 221 member A              |
| hsa-miR-126-5p | <a href="#">TNFAIP3</a>  | TNF alpha induced protein 3                               |
| hsa-miR-126-5p | <a href="#">SOCS4</a>    | suppressor of cytokine signaling 4                        |
| hsa-miR-126-5p | <a href="#">LSAMP</a>    | limbic system associated membrane protein                 |
| hsa-miR-126-5p | <a href="#">PDGFD</a>    | platelet derived growth factor D                          |
| hsa-miR-126-5p | <a href="#">GK</a>       | glycerol kinase                                           |
| hsa-miR-126-5p | <a href="#">TBC1D20</a>  | TBC1 domain family member 20                              |
| hsa-miR-126-5p | <a href="#">CLHC1</a>    | clathrin heavy chain linker domain containing 1           |
| hsa-miR-126-5p | <a href="#">PALLD</a>    | palladin, cytoskeletal associated protein                 |
| hsa-miR-126-5p | <a href="#">RAB3GAP2</a> | RAB3 GTPase activating non-catalytic protein subunit 2    |
| hsa-miR-126-5p | <a href="#">ATP6V1A</a>  | ATPase H+ transporting V1 subunit A                       |
| hsa-miR-126-5p | <a href="#">RAD51B</a>   | RAD51 paralog B                                           |
| hsa-miR-126-5p | <a href="#">REV3L</a>    | REV3 like, DNA directed polymerase zeta catalytic subunit |
| hsa-miR-126-5p | <a href="#">FBXO33</a>   | F-box protein 33                                          |
| hsa-miR-126-5p | <a href="#">CSNK1D</a>   | casein kinase 1 delta                                     |
| hsa-miR-126-5p | <a href="#">ERBIN</a>    | erbB2 interacting protein                                 |
| hsa-miR-126-5p | <a href="#">TMEM26</a>   | transmembrane protein 26                                  |
| hsa-miR-126-5p | <a href="#">ITGB8</a>    | integrin subunit beta 8                                   |
| hsa-miR-126-5p | <a href="#">TNFRSF19</a> | TNF receptor superfamily member 19                        |
| hsa-miR-126-5p | <a href="#">FHL5</a>     | four and a half LIM domains 5                             |
| hsa-miR-126-5p | <a href="#">NLGN4X</a>   | neuroligin 4 X-linked                                     |
| hsa-miR-126-5p | <a href="#">ATXN1L</a>   | ataxin 1 like                                             |
| hsa-miR-126-5p | <a href="#">HSFX3</a>    | heat shock transcription factor family, X-linked member 3 |
| hsa-miR-126-5p | <a href="#">ATG16L1</a>  | autophagy related 16 like 1                               |
| hsa-miR-126-5p | <a href="#">XRN1</a>     | 5'-3' exoribonuclease 1                                   |
| hsa-miR-126-5p | <a href="#">TENT4B</a>   | terminal nucleotidyltransferase 4B                        |
| hsa-miR-126-5p | <a href="#">RAB3IP</a>   | RAB3A interacting protein                                 |
| hsa-miR-126-5p | <a href="#">TLL2</a>     | tolloid like 2                                            |
| hsa-miR-126-5p | <a href="#">STAU2</a>    | staufen double-stranded RNA binding protein 2             |
| hsa-miR-126-5p | <a href="#">CTCFL</a>    | CCCTC-binding factor like                                 |
| hsa-miR-126-5p | <a href="#">GCG</a>      | glucagon                                                  |
| hsa-miR-126-5p | <a href="#">UAP1</a>     | UDP-N-acetylglucosamine pyrophosphorylase 1               |
| hsa-miR-126-5p | <a href="#">TBC1D19</a>  | TBC1 domain family member 19                              |
| hsa-miR-126-5p | <a href="#">FBXO36</a>   | F-box protein 36                                          |
| hsa-miR-126-5p | <a href="#">RNASEL</a>   | ribonuclease L                                            |
| hsa-miR-126-5p | <a href="#">TMEM70</a>   | transmembrane protein 70                                  |
| hsa-miR-126-5p | <a href="#">COLEC10</a>  | collectin subfamily member 10                             |
| hsa-miR-126-5p | <a href="#">DGKH</a>     | diacylglycerol kinase eta                                 |
| hsa-miR-126-5p | <a href="#">SLC25A24</a> | solute carrier family 25 member 24                        |



|                |                          |                                                   |
|----------------|--------------------------|---------------------------------------------------|
| hsa-miR-126-5p | <a href="#">IL15</a>     | interleukin 15                                    |
| hsa-miR-126-5p | <a href="#">VGLL3</a>    | vestigial like family member 3                    |
| hsa-miR-126-5p | <a href="#">ZNF260</a>   | zinc finger protein 260                           |
| hsa-miR-126-5p | <a href="#">SPATA18</a>  | spermatogenesis associated 18                     |
| hsa-miR-126-5p | <a href="#">GRIA4</a>    | glutamate ionotropic receptor AMPA type subunit 4 |
| hsa-miR-126-5p | <a href="#">MBTD1</a>    | mbt domain containing 1                           |
| hsa-miR-126-5p | <a href="#">ARL15</a>    | ADP ribosylation factor like GTPase 15            |
| hsa-miR-126-5p | <a href="#">RAB27B</a>   | RAB27B, member RAS oncogene family                |
| hsa-miR-126-5p | <a href="#">GNB4</a>     | G protein subunit beta 4                          |
| hsa-miR-126-5p | <a href="#">HBEGF</a>    | heparin binding EGF like growth factor            |
| hsa-miR-126-5p | <a href="#">DNAH14</a>   | dynein axonemal heavy chain 14                    |
| hsa-miR-126-5p | <a href="#">MPP7</a>     | membrane palmitoylated protein 7                  |
| hsa-miR-126-5p | <a href="#">C11orf45</a> | chromosome 11 open reading frame 45               |
| hsa-miR-126-5p | <a href="#">EPHB1</a>    | EPH receptor B1                                   |
| hsa-miR-126-5p | <a href="#">SYAP1</a>    | synapse associated protein 1                      |
| hsa-miR-126-5p | <a href="#">LACTB</a>    | lactamase beta                                    |
| hsa-miR-126-5p | <a href="#">ALCAM</a>    | activated leukocyte cell adhesion molecule        |
| hsa-miR-126-5p | <a href="#">TMEM47</a>   | transmembrane protein 47                          |
| hsa-miR-126-5p | <a href="#">TMEM30A</a>  | transmembrane protein 30A                         |
| hsa-miR-126-5p | <a href="#">RGS10</a>    | regulator of G protein signaling 10               |
| hsa-miR-126-5p | <a href="#">SAA2</a>     | serum amyloid A2                                  |
| hsa-miR-126-5p | <a href="#">NRXN3</a>    | neurexin 3                                        |
| hsa-miR-126-5p | <a href="#">ZBTB6</a>    | zinc finger and BTB domain containing 6           |
| hsa-miR-126-5p | <a href="#">NSUN7</a>    | NOP2/Sun RNA methyltransferase family member 7    |
| hsa-miR-126-5p | <a href="#">MMGT1</a>    | membrane magnesium transporter 1                  |
| hsa-miR-126-5p | <a href="#">ZBTB8B</a>   | zinc finger and BTB domain containing 8B          |
| hsa-miR-126-5p | <a href="#">C15orf41</a> | chromosome 15 open reading frame 41               |
| hsa-miR-126-5p | <a href="#">ANKRD33B</a> | ankyrin repeat domain 33B                         |
| hsa-miR-126-5p | <a href="#">RBM46</a>    | RNA binding motif protein 46                      |
| hsa-miR-126-5p | <a href="#">TMEM100</a>  | transmembrane protein 100                         |
| hsa-miR-126-5p | <a href="#">RPS6KA6</a>  | ribosomal protein S6 kinase A6                    |
| hsa-miR-126-5p | <a href="#">ZMYM6</a>    | zinc finger MYM-type containing 6                 |
| hsa-miR-126-5p | <a href="#">UBE2H</a>    | ubiquitin conjugating enzyme E2 H                 |
| hsa-miR-126-5p | <a href="#">ARHGAP32</a> | Rho GTPase activating protein 32                  |
| hsa-miR-126-5p | <a href="#">IL17F</a>    | interleukin 17F                                   |
| hsa-miR-126-5p | <a href="#">UTS2B</a>    | urotensin 2B                                      |
| hsa-miR-126-5p | <a href="#">MAN2A1</a>   | mannosidase alpha class 2A member 1               |
| hsa-miR-126-5p | <a href="#">BZW1</a>     | basic leucine zipper and W2 domains 1             |
| hsa-miR-126-5p | <a href="#">DDR1</a>     | discoidin domain receptor tyrosine kinase 1       |
| hsa-miR-126-5p | <a href="#">SLMAP</a>    | sarcolemma associated protein                     |
| hsa-miR-126-5p | <a href="#">ADHFE1</a>   | alcohol dehydrogenase, iron containing 1          |
| hsa-miR-126-5p | <a href="#">PRRX1</a>    | paired related homeobox 1                         |
| hsa-miR-126-5p | <a href="#">HMBX1</a>    | homeobox containing 1                             |
| hsa-miR-126-5p | <a href="#">MRS2</a>     | magnesium transporter MRS2                        |
| hsa-miR-126-5p | <a href="#">CDC5L</a>    | cell division cycle 5 like                        |

|                |                          |                                                                        |
|----------------|--------------------------|------------------------------------------------------------------------|
| hsa-miR-126-5p | <a href="#">PSMB2</a>    | proteasome subunit beta 2                                              |
| hsa-miR-126-5p | <a href="#">UFSP1</a>    | UFM1 specific peptidase 1 (inactive)                                   |
| hsa-miR-126-5p | <a href="#">PRKD1</a>    | protein kinase D1                                                      |
| hsa-miR-126-5p | <a href="#">MOB1B</a>    | MOB kinase activator 1B                                                |
| hsa-miR-126-5p | <a href="#">PIP4K2C</a>  | phosphatidylinositol-5-phosphate 4-kinase type 2 gamma                 |
| hsa-miR-126-5p | <a href="#">RASAL2</a>   | RAS protein activator like 2                                           |
| hsa-miR-126-5p | <a href="#">MST1L</a>    | macrophage stimulating 1 like                                          |
| hsa-miR-126-5p | <a href="#">ERO1A</a>    | endoplasmic reticulum oxidoreductase 1 alpha                           |
| hsa-miR-126-5p | <a href="#">TMEM135</a>  | transmembrane protein 135                                              |
| hsa-miR-126-5p | <a href="#">ACADL</a>    | acyl-CoA dehydrogenase long chain                                      |
| hsa-miR-126-5p | <a href="#">SOCS6</a>    | suppressor of cytokine signaling 6                                     |
| hsa-miR-126-5p | <a href="#">DMXL1</a>    | Dmx like 1                                                             |
| hsa-miR-126-5p | <a href="#">FLRT2</a>    | fibronectin leucine rich transmembrane protein 2                       |
| hsa-miR-126-5p | <a href="#">SAE1</a>     | SUMO1 activating enzyme subunit 1                                      |
| hsa-miR-126-5p | <a href="#">MBP</a>      | myelin basic protein                                                   |
| hsa-miR-126-5p | <a href="#">PRKX</a>     | protein kinase X-linked                                                |
| hsa-miR-126-5p | <a href="#">MAP3K20</a>  | mitogen-activated protein kinase kinase kinase 20                      |
| hsa-miR-126-5p | <a href="#">DNAJB9</a>   | DnaJ heat shock protein family (Hsp40) member B9                       |
| hsa-miR-126-5p | <a href="#">RMDN1</a>    | regulator of microtubule dynamics 1                                    |
| hsa-miR-126-5p | <a href="#">ZNF41</a>    | zinc finger protein 41                                                 |
| hsa-miR-126-5p | <a href="#">SRGAP2C</a>  | SLIT-ROBO Rho GTPase activating protein 2C                             |
| hsa-miR-126-5p | <a href="#">FAM216B</a>  | family with sequence similarity 216 member B                           |
| hsa-miR-126-5p | <a href="#">MAPKAPK5</a> | mitogen-activated protein kinase-activated protein kinase 5            |
| hsa-miR-126-5p | <a href="#">TMPRSS3</a>  | transmembrane serine protease 3                                        |
| hsa-miR-126-5p | <a href="#">C9orf3</a>   | chromosome 9 open reading frame 3                                      |
| hsa-miR-126-5p | <a href="#">ZSCAN9</a>   | zinc finger and SCAN domain containing 9                               |
| hsa-miR-126-5p | <a href="#">CCDC148</a>  | coiled-coil domain containing 148                                      |
| hsa-miR-126-5p | <a href="#">LCORL</a>    | ligand dependent nuclear receptor corepressor like                     |
| hsa-miR-126-5p | <a href="#">MAPK13</a>   | mitogen-activated protein kinase 13                                    |
| hsa-miR-126-5p | <a href="#">FZD2</a>     | frizzled class receptor 2                                              |
| hsa-miR-126-5p | <a href="#">CFL2</a>     | cofilin 2                                                              |
| hsa-miR-126-5p | <a href="#">FRZB</a>     | frizzled related protein                                               |
| hsa-miR-126-5p | <a href="#">NAA50</a>    | N(alpha)-acetyltransferase 50, NatE catalytic subunit                  |
| hsa-miR-126-5p | <a href="#">STS</a>      | steroid sulfatase                                                      |
| hsa-miR-126-5p | <a href="#">GOLGA7B</a>  | golgin A7 family member B                                              |
| hsa-miR-126-5p | <a href="#">MMAA</a>     | metabolism of cobalamin associated A                                   |
| hsa-miR-126-5p | <a href="#">PGM2L1</a>   | phosphoglucomutase 2 like 1                                            |
| hsa-miR-126-5p | <a href="#">CSRNP3</a>   | cysteine and serine rich nuclear protein 3                             |
| hsa-miR-126-5p | <a href="#">CRNKL1</a>   | crooked neck pre-mRNA splicing factor 1                                |
| hsa-miR-126-5p | <a href="#">ELAVL2</a>   | ELAV like RNA binding protein 2                                        |
| hsa-miR-126-5p | <a href="#">CTR9</a>     | CTR9 homolog, Paf1/RNA polymerase II complex component                 |
| hsa-miR-126-5p | <a href="#">MGP</a>      | matrix Gla protein                                                     |
| hsa-miR-126-5p | <a href="#">ABRAXAS2</a> | abraxas 2, BRISC complex subunit                                       |
| hsa-miR-126-5p | <a href="#">PIK3CA</a>   | phosphatidylinositol-4,5-bisphosphate 3-kinase catalytic subunit alpha |
| hsa-miR-126-5p | <a href="#">CYTIP</a>    | cytohesin 1 interacting protein                                        |

|                |                          |                                                        |
|----------------|--------------------------|--------------------------------------------------------|
| hsa-miR-126-5p | <a href="#">TTC3</a>     | tetratricopeptide repeat domain 3                      |
| hsa-miR-126-5p | <a href="#">FARP1</a>    | FERM, ARH/RhoGEF and pleckstrin domain protein 1       |
| hsa-miR-126-5p | <a href="#">DCAF8L1</a>  | DDB1 and CUL4 associated factor 8 like 1               |
| hsa-miR-126-5p | <a href="#">VAMP4</a>    | vesicle associated membrane protein 4                  |
| hsa-miR-126-5p | <a href="#">MFSD11</a>   | major facilitator superfamily domain containing 11     |
| hsa-miR-126-5p | <a href="#">ARPC5L</a>   | actin related protein 2/3 complex subunit 5 like       |
| hsa-miR-126-5p | <a href="#">CCDC36</a>   | coiled-coil domain containing 36                       |
| hsa-miR-126-5p | <a href="#">INO80D</a>   | INO80 complex subunit D                                |
| hsa-miR-126-5p | <a href="#">OGFRL1</a>   | opioid growth factor receptor like 1                   |
| hsa-miR-126-5p | <a href="#">GIMAP8</a>   | GTPase, IMAP family member 8                           |
| hsa-miR-126-5p | <a href="#">AMER2</a>    | APC membrane recruitment protein 2                     |
| hsa-miR-126-5p | <a href="#">C18orf25</a> | chromosome 18 open reading frame 25                    |
| hsa-miR-126-5p | <a href="#">TMEM71</a>   | transmembrane protein 71                               |
| hsa-miR-126-5p | <a href="#">PELI2</a>    | pellino E3 ubiquitin protein ligase family member 2    |
| hsa-miR-126-5p | <a href="#">RILPL1</a>   | Rab interacting lysosomal protein like 1               |
| hsa-miR-126-5p | <a href="#">BRD1</a>     | bromodomain containing 1                               |
| hsa-miR-126-5p | <a href="#">DPPA4</a>    | developmental pluripotency associated 4                |
| hsa-miR-126-5p | <a href="#">TMEM63B</a>  | transmembrane protein 63B                              |
| hsa-miR-126-5p | <a href="#">FSD1L</a>    | fibronectin type III and SPRY domain containing 1 like |
| hsa-miR-126-5p | <a href="#">TMEM9B</a>   | TMEM9 domain family member B                           |
| hsa-miR-126-5p | <a href="#">DOCK5</a>    | dedicator of cytokinesis 5                             |
| hsa-miR-126-5p | <a href="#">APLF</a>     | aprataxin and PNKP like factor                         |
| hsa-miR-126-5p | <a href="#">MED17</a>    | mediator complex subunit 17                            |
| hsa-miR-126-5p | <a href="#">BTLA</a>     | B and T lymphocyte associated                          |
| hsa-miR-126-5p | <a href="#">BTAF1</a>    | B-TFIID TATA-box binding protein associated factor 1   |
| hsa-miR-126-5p | <a href="#">SH3RF1</a>   | SH3 domain containing ring finger 1                    |
| hsa-miR-126-5p | <a href="#">EPSTI1</a>   | epithelial stromal interaction 1                       |
| hsa-miR-126-5p | <a href="#">LOX</a>      | lysyl oxidase                                          |
| hsa-miR-126-5p | <a href="#">FAM227A</a>  | family with sequence similarity 227 member A           |
| hsa-miR-126-5p | <a href="#">DHX33</a>    | DEAH-box helicase 33                                   |
| hsa-miR-126-5p | <a href="#">FNDC3A</a>   | fibronectin type III domain containing 3A              |
| hsa-miR-126-5p | <a href="#">SRRM4</a>    | serine/arginine repetitive matrix 4                    |
| hsa-miR-126-5p | <a href="#">NCAPG</a>    | non-SMC condensin I complex subunit G                  |
| hsa-miR-126-5p | <a href="#">C12orf71</a> | chromosome 12 open reading frame 71                    |
| hsa-miR-126-5p | <a href="#">SNCA</a>     | synuclein alpha                                        |
| hsa-miR-126-5p | <a href="#">STON2</a>    | stonin 2                                               |
| hsa-miR-126-5p | <a href="#">DCLK2</a>    | doublecortin like kinase 2                             |
| hsa-miR-126-5p | <a href="#">FABP7</a>    | fatty acid binding protein 7                           |
| hsa-miR-126-5p | <a href="#">PDGFRA</a>   | platelet derived growth factor receptor alpha          |
| hsa-miR-126-5p | <a href="#">PNN</a>      | pinin, desmosome associated protein                    |
| hsa-miR-126-5p | <a href="#">YPEL2</a>    | yippee like 2                                          |
| hsa-miR-126-5p | <a href="#">C8orf34</a>  | chromosome 8 open reading frame 34                     |
| hsa-miR-126-5p | <a href="#">DSEL</a>     | dermatan sulfate epimerase like                        |
| hsa-miR-126-5p | <a href="#">ERAP1</a>    | endoplasmic reticulum aminopeptidase 1                 |
| hsa-miR-126-5p | <a href="#">IVD</a>      | isovaleryl-CoA dehydrogenase                           |

|                |                           |                                                  |
|----------------|---------------------------|--------------------------------------------------|
| hsa-miR-126-5p | <a href="#">C1RL</a>      | complement C1r subcomponent like                 |
| hsa-miR-126-5p | <a href="#">KIAA1109</a>  | KIAA1109                                         |
| hsa-miR-126-5p | <a href="#">MS4A1</a>     | membrane spanning 4-domains A1                   |
| hsa-miR-126-5p | <a href="#">HNRNPD</a>    | heterogeneous nuclear ribonucleoprotein D        |
| hsa-miR-126-5p | <a href="#">ZNF627</a>    | zinc finger protein 627                          |
| hsa-miR-126-5p | <a href="#">HBS1L</a>     | HBS1 like translational GTPase                   |
| hsa-miR-126-5p | <a href="#">PHAX</a>      | phosphorylated adaptor for RNA export            |
| hsa-miR-126-5p | <a href="#">SLC25A21</a>  | solute carrier family 25 member 21               |
| hsa-miR-126-5p | <a href="#">C8orf37</a>   | chromosome 8 open reading frame 37               |
| hsa-miR-126-5p | <a href="#">METTL2A</a>   | methyltransferase like 2A                        |
| hsa-miR-126-5p | <a href="#">NADK2</a>     | NAD kinase 2, mitochondrial                      |
| hsa-miR-126-5p | <a href="#">CEP41</a>     | centrosomal protein 41                           |
| hsa-miR-126-5p | <a href="#">RXRG</a>      | retinoid X receptor gamma                        |
| hsa-miR-126-5p | <a href="#">ANKRD42</a>   | ankyrin repeat domain 42                         |
| hsa-miR-126-5p | <a href="#">SECISBP2L</a> | SECIS binding protein 2 like                     |
| hsa-miR-126-5p | <a href="#">CNTN4</a>     | contactin 4                                      |
| hsa-miR-126-5p | <a href="#">POF1B</a>     | POF1B, actin binding protein                     |
| hsa-miR-126-5p | <a href="#">CLDN11</a>    | claudin 11                                       |
| hsa-miR-126-5p | <a href="#">MARK1</a>     | microtubule affinity regulating kinase 1         |
| hsa-miR-126-5p | <a href="#">SAMD8</a>     | sterile alpha motif domain containing 8          |
| hsa-miR-126-5p | <a href="#">ATF6</a>      | activating transcription factor 6                |
| hsa-miR-126-5p | <a href="#">FAM76B</a>    | family with sequence similarity 76 member B      |
| hsa-miR-126-5p | <a href="#">ADAT2</a>     | adenosine deaminase, tRNA specific 2             |
| hsa-miR-126-5p | <a href="#">GRAMD2B</a>   | GRAM domain containing 2B                        |
| hsa-miR-126-5p | <a href="#">PTCHD4</a>    | patched domain containing 4                      |
| hsa-miR-126-5p | <a href="#">C12orf40</a>  | chromosome 12 open reading frame 40              |
| hsa-miR-126-5p | <a href="#">ACSM5</a>     | acyl-CoA synthetase medium chain family member 5 |
| hsa-miR-126-5p | <a href="#">ZNF264</a>    | zinc finger protein 264                          |
| hsa-miR-126-5p | <a href="#">TBC1D9B</a>   | TBC1 domain family member 9B                     |
| hsa-miR-126-5p | <a href="#">DIO3</a>      | iodothyronine deiodinase 3                       |
| hsa-miR-126-5p | <a href="#">TMEM251</a>   | transmembrane protein 251                        |
| hsa-miR-126-5p | <a href="#">AGPAT5</a>    | 1-acylglycerol-3-phosphate O-acyltransferase 5   |
| hsa-miR-126-5p | <a href="#">CYP39A1</a>   | cytochrome P450 family 39 subfamily A member 1   |
| hsa-miR-126-5p | <a href="#">TBX18</a>     | T-box 18                                         |
| hsa-miR-126-5p | <a href="#">CNOT6</a>     | CCR4-NOT transcription complex subunit 6         |
| hsa-miR-126-5p | <a href="#">EYS</a>       | eyes shut homolog                                |
| hsa-miR-126-5p | <a href="#">BCL11B</a>    | BCL11B, BAF complex component                    |
| hsa-miR-126-5p | <a href="#">FAM84B</a>    | family with sequence similarity 84 member B      |
| hsa-miR-126-5p | <a href="#">TFPI2</a>     | tissue factor pathway inhibitor 2                |
| hsa-miR-126-5p | <a href="#">AAK1</a>      | AP2 associated kinase 1                          |
| hsa-miR-126-5p | <a href="#">OPRK1</a>     | opioid receptor kappa 1                          |
| hsa-miR-126-5p | <a href="#">ANGPTL7</a>   | angiopoietin like 7                              |
| hsa-miR-126-5p | <a href="#">CLCN3</a>     | chloride voltage-gated channel 3                 |
| hsa-miR-126-5p | <a href="#">ZC3H6</a>     | zinc finger CCCH-type containing 6               |
| hsa-miR-126-5p | <a href="#">TEX12</a>     | testis expressed 12                              |

|                |                              |                                                           |
|----------------|------------------------------|-----------------------------------------------------------|
| hsa-miR-126-5p | <a href="#">TCF12</a>        | transcription factor 12                                   |
| hsa-miR-126-5p | <a href="#">HPCA</a>         | hippocalcin                                               |
| hsa-miR-126-5p | <a href="#">SLC6A4</a>       | solute carrier family 6 member 4                          |
| hsa-miR-126-5p | <a href="#">NEUROD6</a>      | neuronal differentiation 6                                |
| hsa-miR-126-5p | <a href="#">TMPO</a>         | thymopoietin                                              |
| hsa-miR-126-5p | <a href="#">RRP15</a>        | ribosomal RNA processing 15 homolog                       |
| hsa-miR-126-5p | <a href="#">SFT2D1</a>       | SFT2 domain containing 1                                  |
| hsa-miR-126-5p | <a href="#">EMB</a>          | embigin                                                   |
| hsa-miR-126-5p | <a href="#">SPRED1</a>       | sprouty related EVH1 domain containing 1                  |
| hsa-miR-126-5p | <a href="#">SPICE1</a>       | spindle and centriole associated protein 1                |
| hsa-miR-126-5p | <a href="#">ERCC6</a>        | ERCC excision repair 6, chromatin remodeling factor       |
| hsa-miR-126-5p | <a href="#">TBL1XR1</a>      | transducin beta like 1 X-linked receptor 1                |
| hsa-miR-126-5p | <a href="#">DTD2</a>         | D-tyrosyl-tRNA deacylase 2 (putative)                     |
| hsa-miR-126-5p | <a href="#">GRHL2</a>        | grainyhead like transcription factor 2                    |
| hsa-miR-126-5p | <a href="#">SLFN13</a>       | schlafen family member 13                                 |
| hsa-miR-126-5p | <a href="#">ABCC9</a>        | ATP binding cassette subfamily C member 9                 |
| hsa-miR-126-5p | <a href="#">ZNF81</a>        | zinc finger protein 81                                    |
| hsa-miR-126-5p | <a href="#">SBSPON</a>       | somatomedin B and thrombospondin type 1 domain containing |
| hsa-miR-126-5p | <a href="#">EXPH5</a>        | exophilin 5                                               |
| hsa-miR-126-5p | <a href="#">sept-07</a>      | septin 7                                                  |
| hsa-miR-126-5p | <a href="#">BHLHE41</a>      | basic helix-loop-helix family member e41                  |
| hsa-miR-126-5p | <a href="#">C9orf153</a>     | chromosome 9 open reading frame 153                       |
| hsa-miR-126-5p | <a href="#">PTPN21</a>       | protein tyrosine phosphatase, non-receptor type 21        |
| hsa-miR-126-5p | <a href="#">MMP20</a>        | matrix metalloproteinase 20                               |
| hsa-miR-126-5p | <a href="#">ZADH2</a>        | zinc binding alcohol dehydrogenase domain containing 2    |
| hsa-miR-126-5p | <a href="#">DYNC1I2</a>      | dynein cytoplasmic 1 intermediate chain 2                 |
| hsa-miR-126-5p | <a href="#">SLC17A8</a>      | solute carrier family 17 member 8                         |
| hsa-miR-126-5p | <a href="#">PIH1D3</a>       | PIH1 domain containing 3                                  |
| hsa-miR-126-5p | <a href="#">TRIM61</a>       | tripartite motif containing 61                            |
| hsa-miR-126-5p | <a href="#">HMGB1</a>        | high mobility group box 1                                 |
| hsa-miR-126-5p | <a href="#">SMC1A</a>        | structural maintenance of chromosomes 1A                  |
| hsa-miR-126-5p | <a href="#">IRKL</a>         | JRK like                                                  |
| hsa-miR-126-5p | <a href="#">LOC102724951</a> | uncharacterized LOC102724951                              |
| hsa-miR-126-5p | <a href="#">CEPT1</a>        | choline/ethanolamine phosphotransferase 1                 |
| hsa-miR-126-5p | <a href="#">TMEM168</a>      | transmembrane protein 168                                 |
| hsa-miR-126-5p | <a href="#">ZDHHC21</a>      | zinc finger DHHC-type containing 21                       |
| hsa-miR-126-5p | <a href="#">MAGEF1</a>       | MAGE family member F1                                     |
| hsa-miR-126-5p | <a href="#">HIPK3</a>        | homeodomain interacting protein kinase 3                  |
| hsa-miR-126-5p | <a href="#">GCC1</a>         | GRIP and coiled-coil domain containing 1                  |
| hsa-miR-126-5p | <a href="#">CPNE9</a>        | copine family member 9                                    |
| hsa-miR-126-5p | <a href="#">DLG5</a>         | discs large MAGUK scaffold protein 5                      |
| hsa-miR-126-5p | <a href="#">AMMECR1L</a>     | AMMECR1 like                                              |
| hsa-miR-126-5p | <a href="#">CDC37L1</a>      | cell division cycle 37 like 1                             |
| hsa-miR-126-5p | <a href="#">MELK</a>         | maternal embryonic leucine zipper kinase                  |
| hsa-miR-126-5p | <a href="#">CNTNAP2</a>      | contactin associated protein like 2                       |

|                |                              |                                                                 |
|----------------|------------------------------|-----------------------------------------------------------------|
| hsa-miR-126-5p | <a href="#">TSPO2</a>        | translocator protein 2                                          |
| hsa-miR-126-5p | <a href="#">CRKL</a>         | CRK like proto-oncogene, adaptor protein                        |
| hsa-miR-126-5p | <a href="#">LOC102723360</a> | uncharacterized LOC102723360                                    |
| hsa-miR-126-5p | <a href="#">LOC102724219</a> | uncharacterized LOC102724219                                    |
| hsa-miR-126-5p | <a href="#">PGBD1</a>        | piggyBac transposable element derived 1                         |
| hsa-miR-126-5p | <a href="#">ATN1</a>         | atrophin 1                                                      |
| hsa-miR-126-5p | <a href="#">ZBTB38</a>       | zinc finger and BTB domain containing 38                        |
| hsa-miR-126-5p | <a href="#">ENO4</a>         | enolase 4                                                       |
| hsa-miR-126-5p | <a href="#">FBN1</a>         | fibrillin 1                                                     |
| hsa-miR-126-5p | <a href="#">PPIL1</a>        | peptidylprolyl isomerase like 1                                 |
| hsa-miR-126-5p | <a href="#">CLDN22</a>       | claudin 22                                                      |
| hsa-miR-126-5p | <a href="#">LOC102724843</a> | uncharacterized LOC102724843                                    |
| hsa-miR-126-5p | <a href="#">PRUNE2</a>       | prune homolog 2 with BCH domain                                 |
| hsa-miR-126-5p | <a href="#">FNTB</a>         | farnesyltransferase, CAAX box, beta                             |
| hsa-miR-126-5p | <a href="#">BRD3</a>         | bromodomain containing 3                                        |
| hsa-miR-126-5p | <a href="#">TPD52L3</a>      | TPD52 like 3                                                    |
| hsa-miR-126-5p | <a href="#">TMEM245</a>      | transmembrane protein 245                                       |
| hsa-miR-126-5p | <a href="#">GLUD1</a>        | glutamate dehydrogenase 1                                       |
| hsa-miR-126-5p | <a href="#">CA13</a>         | carbonic anhydrase 13                                           |
| hsa-miR-126-5p | <a href="#">VXN</a>          | vexin                                                           |
| hsa-miR-126-5p | <a href="#">TNC</a>          | tenascin C                                                      |
| hsa-miR-126-5p | <a href="#">GOLGA6D</a>      | golgin A6 family member D                                       |
| hsa-miR-126-5p | <a href="#">CPNE8</a>        | copine 8                                                        |
| hsa-miR-126-5p | <a href="#">SNX4</a>         | sorting nexin 4                                                 |
| hsa-miR-126-5p | <a href="#">C7orf57</a>      | chromosome 7 open reading frame 57                              |
| hsa-miR-126-5p | <a href="#">TPD52L1</a>      | TPD52 like 1                                                    |
| hsa-miR-126-5p | <a href="#">MARF1</a>        | meiosis regulator and mRNA stability factor 1                   |
| hsa-miR-126-5p | <a href="#">HMGCR</a>        | 3-hydroxy-3-methylglutaryl-CoA reductase                        |
| hsa-miR-126-5p | <a href="#">CHD9</a>         | chromodomain helicase DNA binding protein 9                     |
| hsa-miR-126-5p | <a href="#">IRX3</a>         | iroquois homeobox 3                                             |
| hsa-miR-126-5p | <a href="#">sept-02</a>      | septin 2                                                        |
| hsa-miR-126-5p | <a href="#">SEC14L1</a>      | SEC14 like lipid binding 1                                      |
| hsa-miR-126-5p | <a href="#">CDH19</a>        | cadherin 19                                                     |
| hsa-miR-126-5p | <a href="#">IGF2BP2</a>      | insulin like growth factor 2 mRNA binding protein 2             |
| hsa-miR-126-5p | <a href="#">TM4SF18</a>      | transmembrane 4 L six family member 18                          |
| hsa-miR-126-5p | <a href="#">GLRB</a>         | glycine receptor beta                                           |
| hsa-miR-126-5p | <a href="#">GTF2A1</a>       | general transcription factor IIA subunit 1                      |
| hsa-miR-126-5p | <a href="#">KLHL41</a>       | kelch like family member 41                                     |
| hsa-miR-126-5p | <a href="#">FAT4</a>         | FAT atypical cadherin 4                                         |
| hsa-miR-126-5p | <a href="#">ETS2</a>         | ETS proto-oncogene 2, transcription factor                      |
| hsa-miR-126-5p | <a href="#">ZNF607</a>       | zinc finger protein 607                                         |
| hsa-miR-126-5p | <a href="#">TRAF3</a>        | TNF receptor associated factor 3                                |
| hsa-miR-126-5p | <a href="#">TNKS2</a>        | tankyrase 2                                                     |
| hsa-miR-126-5p | <a href="#">HECW2</a>        | HECT, C2 and WW domain containing E3 ubiquitin protein ligase 2 |
| hsa-miR-126-5p | <a href="#">F5</a>           | coagulation factor V                                            |



|                |                                |                                                                         |
|----------------|--------------------------------|-------------------------------------------------------------------------|
| hsa-miR-126-5p | <a href="#">TMEM189</a>        | transmembrane protein 189                                               |
| hsa-miR-126-5p | <a href="#">BTBD1</a>          | BTB domain containing 1                                                 |
| hsa-miR-126-5p | <a href="#">LRRK2</a>          | leucine rich repeat kinase 2                                            |
| hsa-miR-126-5p | <a href="#">CXADR</a>          | CXADR, Ig-like cell adhesion molecule                                   |
| hsa-miR-126-5p | <a href="#">PLSCR4</a>         | phospholipid scramblase 4                                               |
| hsa-miR-126-5p | <a href="#">TFPI</a>           | tissue factor pathway inhibitor                                         |
| hsa-miR-126-5p | <a href="#">NCALD</a>          | neurocalcin delta                                                       |
| hsa-miR-126-5p | <a href="#">SGCB</a>           | sarcoglycan beta                                                        |
| hsa-miR-126-5p | <a href="#">PPFIA1</a>         | PTPRF interacting protein alpha 1                                       |
| hsa-miR-126-5p | <a href="#">ANKRD29</a>        | ankyrin repeat domain 29                                                |
| hsa-miR-126-5p | <a href="#">MLANA</a>          | melan-A                                                                 |
| hsa-miR-126-5p | <a href="#">LYPLA1</a>         | lysophospholipase 1                                                     |
| hsa-miR-126-5p | <a href="#">GJC1</a>           | gap junction protein gamma 1                                            |
| hsa-miR-126-5p | <a href="#">HCN1</a>           | hyperpolarization activated cyclic nucleotide gated potassium channel 1 |
| hsa-miR-126-5p | <a href="#">FAM155A</a>        | family with sequence similarity 155 member A                            |
| hsa-miR-126-5p | <a href="#">MIA2</a>           | MIA SH3 domain ER export factor 2                                       |
| hsa-miR-126-5p | <a href="#">AZIN1</a>          | antizyme inhibitor 1                                                    |
| hsa-miR-126-5p | <a href="#">MEX3B</a>          | mex-3 RNA binding family member B                                       |
| hsa-miR-126-5p | <a href="#">C18orf32</a>       | chromosome 18 open reading frame 32                                     |
| hsa-miR-126-5p | <a href="#">FSHR</a>           | follicle stimulating hormone receptor                                   |
| hsa-miR-126-5p | <a href="#">SMIM10L1</a>       | small integral membrane protein 10 like 1                               |
| hsa-miR-126-5p | <a href="#">ZNF74</a>          | zinc finger protein 74                                                  |
| hsa-miR-126-5p | <a href="#">PTPRC</a>          | protein tyrosine phosphatase, receptor type C                           |
| hsa-miR-126-5p | <a href="#">FABP4</a>          | fatty acid binding protein 4                                            |
| hsa-miR-126-5p | <a href="#">UBTD2</a>          | ubiquitin domain containing 2                                           |
| hsa-miR-126-5p | <a href="#">HDAC4</a>          | histone deacetylase 4                                                   |
| hsa-miR-126-5p | <a href="#">KSR1</a>           | kinase suppressor of ras 1                                              |
| hsa-miR-126-5p | <a href="#">FAT3</a>           | FAT atypical cadherin 3                                                 |
| hsa-miR-126-5p | <a href="#">VPREB3</a>         | V-set pre-B cell surrogate light chain 3                                |
| hsa-miR-126-5p | <a href="#">DDX43</a>          | DEAD-box helicase 43                                                    |
| hsa-miR-126-5p | <a href="#">NR2F1</a>          | nuclear receptor subfamily 2 group F member 1                           |
| hsa-miR-126-5p | <a href="#">RPS6KC1</a>        | ribosomal protein S6 kinase C1                                          |
| hsa-miR-126-5p | <a href="#">BCL2L2</a>         | BCL2 like 2                                                             |
| hsa-miR-126-5p | <a href="#">SLAIN2</a>         | SLAIN motif family member 2                                             |
| hsa-miR-126-5p | <a href="#">DTL</a>            | denticleless E3 ubiquitin protein ligase homolog                        |
| hsa-miR-126-5p | <a href="#">RALGAPA1</a>       | Ral GTPase activating protein catalytic alpha subunit 1                 |
| hsa-miR-126-5p | <a href="#">NETO1</a>          | neuropilin and tolloid like 1                                           |
| hsa-miR-126-5p | <a href="#">NUAK1</a>          | NUAK family kinase 1                                                    |
| hsa-miR-126-5p | <a href="#">PPP2R5E</a>        | protein phosphatase 2 regulatory subunit B'epsilon                      |
| hsa-miR-126-5p | <a href="#">RPL17-C18orf32</a> | RPL17-C18orf32 readthrough                                              |
| hsa-miR-126-5p | <a href="#">ENTPD7</a>         | ectonucleoside triphosphate diphosphohydrolase 7                        |
| hsa-miR-126-5p | <a href="#">RFT1</a>           | RFT1 homolog                                                            |
| hsa-miR-126-5p | <a href="#">RCOR3</a>          | REST corepressor 3                                                      |
| hsa-miR-126-5p | <a href="#">PAM</a>            | peptidylglycine alpha-amidating monooxygenase                           |



|                |                           |                                                                         |
|----------------|---------------------------|-------------------------------------------------------------------------|
| hsa-miR-126-5p | <a href="#">KCNJ16</a>    | potassium voltage-gated channel subfamily J member 16                   |
| hsa-miR-126-5p | <a href="#">BEND3</a>     | BEN domain containing 3                                                 |
| hsa-miR-126-5p | <a href="#">ZEB1</a>      | zinc finger E-box binding homeobox 1                                    |
| hsa-miR-126-5p | <a href="#">RHOBTB1</a>   | Rho related BTB domain containing 1                                     |
| hsa-miR-126-5p | <a href="#">MCU</a>       | mitochondrial calcium uniporter                                         |
| hsa-miR-126-5p | <a href="#">ZNF697</a>    | zinc finger protein 697                                                 |
| hsa-miR-126-5p | <a href="#">UBR5</a>      | ubiquitin protein ligase E3 component n-recognin 5                      |
| hsa-miR-126-5p | <a href="#">LINGO1</a>    | leucine rich repeat and Ig domain containing 1                          |
| hsa-miR-126-5p | <a href="#">KCNT2</a>     | potassium sodium-activated channel subfamily T member 2                 |
| hsa-miR-126-5p | <a href="#">ZNF212</a>    | zinc finger protein 212                                                 |
| hsa-miR-126-5p | <a href="#">VPS4B</a>     | vacuolar protein sorting 4 homolog B                                    |
| hsa-miR-126-5p | <a href="#">PIP4K2A</a>   | phosphatidylinositol-5-phosphate 4-kinase type 2 alpha                  |
| hsa-miR-126-5p | <a href="#">EVI5</a>      | ecotropic viral integration site 5                                      |
| hsa-miR-126-5p | <a href="#">HCN4</a>      | hyperpolarization activated cyclic nucleotide gated potassium channel 4 |
| hsa-miR-126-5p | <a href="#">SDE2</a>      | SDE2 telomere maintenance homolog                                       |
| hsa-miR-126-5p | <a href="#">ACYP2</a>     | acylphosphatase 2                                                       |
| hsa-miR-126-5p | <a href="#">CTSS</a>      | cathepsin S                                                             |
| hsa-miR-126-5p | <a href="#">KCTD4</a>     | potassium channel tetramerization domain containing 4                   |
| hsa-miR-126-5p | <a href="#">CFHR3</a>     | complement factor H related 3                                           |
| hsa-miR-126-5p | <a href="#">MARCKS</a>    | myristoylated alanine rich protein kinase C substrate                   |
| hsa-miR-126-5p | <a href="#">TNFRSF11A</a> | TNF receptor superfamily member 11a                                     |
| hsa-miR-126-5p | <a href="#">SLC2A13</a>   | solute carrier family 2 member 13                                       |
| hsa-miR-126-5p | <a href="#">OGN</a>       | osteoglycin                                                             |
| hsa-miR-126-5p | <a href="#">INHBE</a>     | inhibin subunit beta E                                                  |
| hsa-miR-126-5p | <a href="#">C14orf39</a>  | chromosome 14 open reading frame 39                                     |
| hsa-miR-126-5p | <a href="#">NRAP</a>      | nebulin related anchoring protein                                       |
| hsa-miR-126-5p | <a href="#">DCBLD2</a>    | discoidin, CUB and LCCL domain containing 2                             |
| hsa-miR-126-5p | <a href="#">NUP88</a>     | nucleoporin 88                                                          |
| hsa-miR-126-5p | <a href="#">NUP88</a>     | nucleoporin 88                                                          |
| hsa-miR-126-5p | <a href="#">FAM151B</a>   | family with sequence similarity 151 member B                            |
| hsa-miR-126-5p | <a href="#">MBL2</a>      | mannose binding lectin 2                                                |
| hsa-miR-126-5p | <a href="#">REF3</a>      | regulatory factor X3                                                    |
| hsa-miR-126-5p | <a href="#">SPRY3</a>     | sprouty RTK signaling antagonist 3                                      |
| hsa-miR-126-5p | <a href="#">TMEFF2</a>    | transmembrane protein with EGF like and two follistatin like domains 2  |
| hsa-miR-126-5p | <a href="#">SCAI</a>      | suppressor of cancer cell invasion                                      |
| hsa-miR-126-5p | <a href="#">TOR1AIP2</a>  | torsin 1A interacting protein 2                                         |
| hsa-miR-126-5p | <a href="#">ARHGAP9</a>   | Rho GTPase activating protein 9                                         |
| hsa-miR-126-5p | <a href="#">FGFR2</a>     | fibroblast growth factor receptor 2                                     |
| hsa-miR-126-5p | <a href="#">TLL1</a>      | tolloid like 1                                                          |
| hsa-miR-126-5p | <a href="#">CDKN2D</a>    | cyclin dependent kinase inhibitor 2D                                    |
| hsa-miR-126-5p | <a href="#">RANBP3L</a>   | RAN binding protein 3 like                                              |
| hsa-miR-126-5p | <a href="#">CAST</a>      | calpastatin                                                             |
| hsa-miR-126-5p | <a href="#">ROCK1</a>     | Rho associated coiled-coil containing protein kinase 1                  |

|                |                            |                                                                 |
|----------------|----------------------------|-----------------------------------------------------------------|
| hsa-miR-126-5p | <a href="#">PRKCH</a>      | protein kinase C eta                                            |
| hsa-miR-126-5p | <a href="#">CDC14A</a>     | cell division cycle 14A                                         |
| hsa-miR-126-5p | <a href="#">PDZD2</a>      | PDZ domain containing 2                                         |
| hsa-miR-126-5p | <a href="#">BCAT1</a>      | branched chain amino acid transaminase 1                        |
| hsa-miR-126-5p | <a href="#">ZSCAN30</a>    | zinc finger and SCAN domain containing 30                       |
| hsa-miR-126-5p | <a href="#">MAPK1IP1L</a>  | mitogen-activated protein kinase 1 interacting protein 1 like   |
| hsa-miR-126-5p | <a href="#">MTFR1</a>      | mitochondrial fission regulator 1                               |
| hsa-miR-126-5p | <a href="#">AP1AR</a>      | adaptor related protein complex 1 associated regulatory protein |
| hsa-miR-126-5p | <a href="#">OR51E2</a>     | olfactory receptor family 51 subfamily E member 2               |
| hsa-miR-126-5p | <a href="#">RGS18</a>      | regulator of G protein signaling 18                             |
| hsa-miR-126-5p | <a href="#">ADAM22</a>     | ADAM metallopeptidase domain 22                                 |
| hsa-miR-126-5p | <a href="#">AKNA</a>       | AT-hook transcription factor                                    |
| hsa-miR-126-5p | <a href="#">PTGFR</a>      | prostaglandin F receptor                                        |
| hsa-miR-126-5p | <a href="#">CCDC82</a>     | coiled-coil domain containing 82                                |
| hsa-miR-126-5p | <a href="#">ZFYVE16</a>    | zinc finger FYVE-type containing 16                             |
| hsa-miR-126-5p | <a href="#">SEC22A</a>     | SEC22 homolog A, vesicle trafficking protein                    |
| hsa-miR-126-5p | <a href="#">GLO1</a>       | glyoxalase I                                                    |
| hsa-miR-126-5p | <a href="#">STXBP4</a>     | syntaxin binding protein 4                                      |
| hsa-miR-126-5p | <a href="#">ARF6</a>       | ADP ribosylation factor 6                                       |
| hsa-miR-126-5p | <a href="#">ANAPC7</a>     | anaphase promoting complex subunit 7                            |
| hsa-miR-126-5p | <a href="#">ZNF793</a>     | zinc finger protein 793                                         |
| hsa-miR-126-5p | <a href="#">CLASP1</a>     | cytoplasmic linker associated protein 1                         |
| hsa-miR-126-5p | <a href="#">PTPRD</a>      | protein tyrosine phosphatase, receptor type D                   |
| hsa-miR-126-5p | <a href="#">RBBP4</a>      | RB binding protein 4, chromatin remodeling factor               |
| hsa-miR-126-5p | <a href="#">SRCAP</a>      | Snf2 related CREBBP activator protein                           |
| hsa-miR-126-5p | <a href="#">KCNH2</a>      | potassium voltage-gated channel subfamily H member 2            |
| hsa-miR-126-5p | <a href="#">REL</a>        | REL proto-oncogene, NF-kB subunit                               |
| hsa-miR-126-5p | <a href="#">CPNE3</a>      | copine 3                                                        |
| hsa-miR-126-5p | <a href="#">MYT1</a>       | myelin transcription factor 1                                   |
| hsa-miR-126-5p | <a href="#">DVL3</a>       | dishevelled segment polarity protein 3                          |
| hsa-miR-126-5p | <a href="#">COL4A1</a>     | collagen type IV alpha 1 chain                                  |
| hsa-miR-126-5p | <a href="#">ST8SIA1</a>    | ST8 alpha-N-acetyl-neuraminide alpha-2,8-sialyltransferase 1    |
| hsa-miR-126-5p | <a href="#">RNMT</a>       | RNA guanine-7 methyltransferase                                 |
| hsa-miR-126-5p | <a href="#">CA5B</a>       | carbonic anhydrase 5B                                           |
| hsa-miR-126-5p | <a href="#">DSC2</a>       | desmocollin 2                                                   |
| hsa-miR-126-5p | <a href="#">RALGPS2</a>    | Ral GEF with PH domain and SH3 binding motif 2                  |
| hsa-miR-126-5p | <a href="#">PIH1D2</a>     | PIH1 domain containing 2                                        |
| hsa-miR-126-5p | <a href="#">RAPGEF6</a>    | Rap guanine nucleotide exchange factor 6                        |
| hsa-miR-126-5p | <a href="#">CCKBR</a>      | cholecystokinin B receptor                                      |
| hsa-miR-126-5p | <a href="#">DDX31</a>      | DEAD-box helicase 31                                            |
| hsa-miR-126-5p | <a href="#">TCAIM</a>      | T cell activation inhibitor, mitochondrial                      |
| hsa-miR-126-5p | <a href="#">MICU3</a>      | mitochondrial calcium uptake family member 3                    |
| hsa-miR-126-5p | <a href="#">ST6GALNAC1</a> | ST6 N-acetylgalactosaminide alpha-2,6-sialyltransferase 1       |
| hsa-miR-126-5p | <a href="#">SERF1B</a>     | small EDRK-rich factor 1B                                       |
| hsa-miR-126-5p | <a href="#">UPP2</a>       | uridine phosphorylase 2                                         |

|                |                         |                                                         |
|----------------|-------------------------|---------------------------------------------------------|
| hsa-miR-126-5p | <a href="#">LHFPL3</a>  | LHFPL tetraspan subfamily member 3                      |
| hsa-miR-126-5p | <a href="#">NAALAD2</a> | N-acetylated alpha-linked acidic dipeptidase 2          |
| hsa-miR-126-5p | <a href="#">OLFM3</a>   | olfactomedin 3                                          |
| hsa-miR-126-5p | <a href="#">ZNF254</a>  | zinc finger protein 254                                 |
| hsa-miR-126-5p | <a href="#">TCFL5</a>   | transcription factor like 5                             |
| hsa-miR-126-5p | <a href="#">A1CF</a>    | APOBEC1 complementation factor                          |
| hsa-miR-126-5p | <a href="#">RIMS1</a>   | regulating synaptic membrane exocytosis 1               |
| hsa-miR-126-5p | <a href="#">THSD7A</a>  | thrombospondin type 1 domain containing 7A              |
| hsa-miR-126-5p | <a href="#">ZNF546</a>  | zinc finger protein 546                                 |
| hsa-miR-126-5p | <a href="#">DPP8</a>    | dipeptidyl peptidase 8                                  |
| hsa-miR-126-5p | <a href="#">MAP9</a>    | microtubule associated protein 9                        |
| hsa-miR-126-5p | <a href="#">C5orf30</a> | chromosome 5 open reading frame 30                      |
| hsa-miR-126-5p | <a href="#">USP15</a>   | ubiquitin specific peptidase 15                         |
| hsa-miR-126-5p | <a href="#">XPA</a>     | XPA, DNA damage recognition and repair factor           |
| hsa-miR-126-5p | <a href="#">PKIA</a>    | cAMP-dependent protein kinase inhibitor alpha           |
| hsa-miR-126-5p | <a href="#">EIF2A</a>   | eukaryotic translation initiation factor 2A             |
| hsa-miR-126-5p | <a href="#">IAKMIP3</a> | Janus kinase and microtubule interacting protein 3      |
| hsa-miR-126-5p | <a href="#">FAF1</a>    | Fas associated factor 1                                 |
| hsa-miR-126-5p | <a href="#">QKI</a>     | QKI, KH domain containing RNA binding                   |
| hsa-miR-126-5p | <a href="#">CPEB2</a>   | cytoplasmic polyadenylation element binding protein 2   |
| hsa-miR-126-5p | <a href="#">PLOD2</a>   | procollagen-lysine,2-oxoglutarate 5-dioxygenase 2       |
| hsa-miR-126-5p | <a href="#">H3F3A</a>   | H3 histone family member 3A                             |
| hsa-miR-126-5p | <a href="#">BMPRI1B</a> | bone morphogenetic protein receptor type 1B             |
| hsa-miR-126-5p | <a href="#">ILDR2</a>   | immunoglobulin like domain containing receptor 2        |
| hsa-miR-126-5p | <a href="#">GPR155</a>  | G protein-coupled receptor 155                          |
| hsa-miR-126-5p | <a href="#">COPA</a>    | coatamer protein complex subunit alpha                  |
| hsa-miR-126-5p | <a href="#">FLT4</a>    | fms related tyrosine kinase 4                           |
| hsa-miR-126-5p | <a href="#">LIN54</a>   | lin-54 DREAM MuvB core complex component                |
| hsa-miR-126-5p | <a href="#">FOXN3</a>   | forkhead box N3                                         |
| hsa-miR-126-5p | <a href="#">FOLH1B</a>  | folate hydrolase 1B                                     |
| hsa-miR-126-5p | <a href="#">ZSCAN32</a> | zinc finger and SCAN domain containing 32               |
| hsa-miR-126-5p | <a href="#">ADCY7</a>   | adenylate cyclase 7                                     |
| hsa-miR-126-5p | <a href="#">DDHD1</a>   | DDHD domain containing 1                                |
| hsa-miR-126-5p | <a href="#">IMY</a>     | junction mediating and regulatory protein, p53 cofactor |
| hsa-miR-126-5p | <a href="#">CACNA1E</a> | calcium voltage-gated channel subunit alpha1 E          |
| hsa-miR-126-5p | <a href="#">CFAP299</a> | cilia and flagella associated protein 299               |
| hsa-miR-126-5p | <a href="#">HIF1A</a>   | hypoxia inducible factor 1 subunit alpha                |
| hsa-miR-126-5p | <a href="#">CLCC1</a>   | chloride channel CLIC like 1                            |
| hsa-miR-126-5p | <a href="#">POLR2F</a>  | RNA polymerase II subunit F                             |
| hsa-miR-126-5p | <a href="#">GPA33</a>   | glycoprotein A33                                        |
| hsa-miR-126-5p | <a href="#">MED13L</a>  | mediator complex subunit 13 like                        |
| hsa-miR-126-5p | <a href="#">DOK6</a>    | docking protein 6                                       |
| hsa-miR-126-5p | <a href="#">OSBPL8</a>  | oxysterol binding protein like 8                        |
| hsa-miR-126-5p | <a href="#">HECA</a>    | hdc homolog, cell cycle regulator                       |
| hsa-miR-126-5p | <a href="#">TTC33</a>   | tetratricopeptide repeat domain 33                      |

|                |                           |                                                        |
|----------------|---------------------------|--------------------------------------------------------|
| hsa-miR-126-5p | <a href="#">AEBP2</a>     | AE binding protein 2                                   |
| hsa-miR-126-5p | <a href="#">ZBTB2</a>     | zinc finger and BTB domain containing 2                |
| hsa-miR-126-5p | <a href="#">PLXNA4</a>    | plexin A4                                              |
| hsa-miR-126-5p | <a href="#">DDX21</a>     | DExD-box helicase 21                                   |
| hsa-miR-126-5p | <a href="#">M1AP</a>      | meiosis 1 associated protein                           |
| hsa-miR-126-5p | <a href="#">SPAG16</a>    | sperm associated antigen 16                            |
| hsa-miR-126-5p | <a href="#">KIF5B</a>     | kinesin family member 5B                               |
| hsa-miR-126-5p | <a href="#">DCUN1D5</a>   | defective in cullin neddylation 1 domain containing 5  |
| hsa-miR-126-5p | <a href="#">NRXN1</a>     | neurexin 1                                             |
| hsa-miR-126-5p | <a href="#">NAF1</a>      | nuclear assembly factor 1 ribonucleoprotein            |
| hsa-miR-126-5p | <a href="#">CD44</a>      | CD44 molecule (Indian blood group)                     |
| hsa-miR-126-5p | <a href="#">SERF1A</a>    | small EDRK-rich factor 1A                              |
| hsa-miR-126-5p | <a href="#">CPLX3</a>     | complexin 3                                            |
| hsa-miR-126-5p | <a href="#">HDAC9</a>     | histone deacetylase 9                                  |
| hsa-miR-126-5p | <a href="#">LRP1B</a>     | LDL receptor related protein 1B                        |
| hsa-miR-126-5p | <a href="#">EPHA7</a>     | EPH receptor A7                                        |
| hsa-miR-126-5p | <a href="#">ME2</a>       | malic enzyme 2                                         |
| hsa-miR-126-5p | <a href="#">CLIC2</a>     | chloride intracellular channel 2                       |
| hsa-miR-126-5p | <a href="#">NAB1</a>      | NGFI-A binding protein 1                               |
| hsa-miR-126-5p | <a href="#">TOB2</a>      | transducer of ERBB2, 2                                 |
| hsa-miR-126-5p | <a href="#">GABRA6</a>    | gamma-aminobutyric acid type A receptor alpha6 subunit |
| hsa-miR-126-5p | <a href="#">PTER</a>      | phosphotriesterase related                             |
| hsa-miR-126-5p | <a href="#">PNPLA8</a>    | patatin like phospholipase domain containing 8         |
| hsa-miR-126-5p | <a href="#">SKAP2</a>     | src kinase associated phosphoprotein 2                 |
| hsa-miR-126-5p | <a href="#">C8orf88</a>   | chromosome 8 open reading frame 88                     |
| hsa-miR-126-5p | <a href="#">ANAPC16</a>   | anaphase promoting complex subunit 16                  |
| hsa-miR-126-5p | <a href="#">TMPRSS11D</a> | transmembrane serine protease 11D                      |
| hsa-miR-126-5p | <a href="#">LRRC19</a>    | leucine rich repeat containing 19                      |
| hsa-miR-126-5p | <a href="#">PLEKHF1</a>   | pleckstrin homology and FYVE domain containing 1       |
| hsa-miR-126-5p | <a href="#">SLC17A9</a>   | solute carrier family 17 member 9                      |
| hsa-miR-126-5p | <a href="#">CRCP</a>      | CGRP receptor component                                |
| hsa-miR-126-5p | <a href="#">PTH2R</a>     | parathyroid hormone 2 receptor                         |
| hsa-miR-126-5p | <a href="#">BCO1</a>      | beta-carotene oxygenase 1                              |
| hsa-miR-128-3p | <a href="#">AFF4</a>      | AF4/FMR2 family member 4                               |
| hsa-miR-128-3p | <a href="#">SZRD1</a>     | SUZ RNA binding domain containing 1                    |
| hsa-miR-128-3p | <a href="#">KDM7A</a>     | lysine demethylase 7A                                  |
| hsa-miR-128-3p | <a href="#">SEC22A</a>    | SEC22 homolog A, vesicle trafficking protein           |
| hsa-miR-128-3p | <a href="#">GPAM</a>      | glycerol-3-phosphate acyltransferase, mitochondrial    |
| hsa-miR-128-3p | <a href="#">FRMPD3</a>    | FERM and PDZ domain containing 3                       |
| hsa-miR-128-3p | <a href="#">RPS6KA5</a>   | ribosomal protein S6 kinase A5                         |
| hsa-miR-128-3p | <a href="#">PAIP2</a>     | poly(A) binding protein interacting protein 2          |
| hsa-miR-128-3p | <a href="#">PHF6</a>      | PHD finger protein 6                                   |
| hsa-miR-128-3p | <a href="#">DCUN1D4</a>   | defective in cullin neddylation 1 domain containing 4  |
| hsa-miR-128-3p | <a href="#">SMAP1</a>     | small ArfGAP 1                                         |
| hsa-miR-128-3p | <a href="#">IGLON5</a>    | IgLON family member 5                                  |

|                |                                |                                                                  |
|----------------|--------------------------------|------------------------------------------------------------------|
| hsa-miR-128-3p | <a href="#">UBE2E2</a>         | ubiquitin conjugating enzyme E2 E2                               |
| hsa-miR-128-3p | <a href="#">KCNK2</a>          | potassium two pore domain channel subfamily K member 2           |
| hsa-miR-128-3p | <a href="#">POGLUT1</a>        | protein O-glucosyltransferase 1                                  |
| hsa-miR-128-3p | <a href="#">ARRDC4</a>         | arrestin domain containing 4                                     |
| hsa-miR-128-3p | <a href="#">MOSMO</a>          | modulator of smoothened                                          |
| hsa-miR-128-3p | <a href="#">KCNK10</a>         | potassium two pore domain channel subfamily K member 10          |
| hsa-miR-128-3p | <a href="#">CDS1</a>           | CDP-diacylglycerol synthase 1                                    |
| hsa-miR-128-3p | <a href="#">PLK2</a>           | polo like kinase 2                                               |
| hsa-miR-128-3p | <a href="#">TNPO1</a>          | transportin 1                                                    |
| hsa-miR-128-3p | <a href="#">TRPV3</a>          | transient receptor potential cation channel subfamily V member 3 |
| hsa-miR-128-3p | <a href="#">TMTC2</a>          | transmembrane and tetratricopeptide repeat containing 2          |
| hsa-miR-128-3p | <a href="#">GRIA3</a>          | glutamate ionotropic receptor AMPA type subunit 3                |
| hsa-miR-128-3p | <a href="#">SRGAP2</a>         | SLIT-ROBO Rho GTPase activating protein 2                        |
| hsa-miR-128-3p | <a href="#">OTULIN</a>         | OTU deubiquitinase with linear linkage specificity               |
| hsa-miR-128-3p | <a href="#">MSI2</a>           | musashi RNA binding protein 2                                    |
| hsa-miR-128-3p | <a href="#">DTX4</a>           | deltex E3 ubiquitin ligase 4                                     |
| hsa-miR-128-3p | <a href="#">CSF1</a>           | colony stimulating factor 1                                      |
| hsa-miR-128-3p | <a href="#">BEND4</a>          | BEN domain containing 4                                          |
| hsa-miR-128-3p | <a href="#">NGFR</a>           | nerve growth factor receptor                                     |
| hsa-miR-128-3p | <a href="#">SS18</a>           | SS18, nBAF chromatin remodeling complex subunit                  |
| hsa-miR-128-3p | <a href="#">POGZ</a>           | pogo transposable element derived with ZNF domain                |
| hsa-miR-128-3p | <a href="#">SOCS5</a>          | suppressor of cytokine signaling 5                               |
| hsa-miR-128-3p | <a href="#">ECE2</a>           | endothelin converting enzyme 2                                   |
| hsa-miR-128-3p | <a href="#">CACNG2</a>         | calcium voltage-gated channel auxiliary subunit gamma 2          |
| hsa-miR-128-3p | <a href="#">RGL2</a>           | ral guanine nucleotide dissociation stimulator like 2            |
| hsa-miR-128-3p | <a href="#">UBR5</a>           | ubiquitin protein ligase E3 component n-recogin 5                |
| hsa-miR-128-3p | <a href="#">PRKX</a>           | protein kinase X-linked                                          |
| hsa-miR-128-3p | <a href="#">MPP6</a>           | membrane palmitoylated protein 6                                 |
| hsa-miR-128-3p | <a href="#">FAM184A</a>        | family with sequence similarity 184 member A                     |
| hsa-miR-128-3p | <a href="#">PCNX1</a>          | pecanex 1                                                        |
| hsa-miR-128-3p | <a href="#">EEF1AKMT4-ECE2</a> | EEF1AKMT4-ECE2 readthrough                                       |
| hsa-miR-128-3p | <a href="#">SLC22A23</a>       | solute carrier family 22 member 23                               |
| hsa-miR-128-3p | <a href="#">NRK</a>            | Nik related kinase                                               |
| hsa-miR-128-3p | <a href="#">GAB1</a>           | GRB2 associated binding protein 1                                |
| hsa-miR-128-3p | <a href="#">TUB</a>            | tubby bipartite transcription factor                             |
| hsa-miR-128-3p | <a href="#">TEAD1</a>          | TEA domain transcription factor 1                                |
| hsa-miR-128-3p | <a href="#">DOT1L</a>          | DOT1 like histone lysine methyltransferase                       |
| hsa-miR-128-3p | <a href="#">NFIL3</a>          | nuclear factor, interleukin 3 regulated                          |
| hsa-miR-128-3p | <a href="#">PDIA5</a>          | protein disulfide isomerase family A member 5                    |
| hsa-miR-128-3p | <a href="#">SLC6A1</a>         | solute carrier family 6 member 1                                 |
| hsa-miR-128-3p | <a href="#">GCC1</a>           | GRIP and coiled-coil domain containing 1                         |
| hsa-miR-128-3p | <a href="#">AKIRIN1</a>        | akirin 1                                                         |
| hsa-miR-128-3p | <a href="#">UNC13C</a>         | unc-13 homolog C                                                 |
| hsa-miR-128-3p | <a href="#">CCDC88A</a>        | coiled-coil domain containing 88A                                |

|                |                         |                                                                             |
|----------------|-------------------------|-----------------------------------------------------------------------------|
| hsa-miR-128-3p | <a href="#">RO60</a>    | Ro60, Y RNA binding protein                                                 |
| hsa-miR-128-3p | <a href="#">MED13L</a>  | mediator complex subunit 13 like                                            |
| hsa-miR-128-3p | <a href="#">RETREG3</a> | reticulophagy regulator family member 3                                     |
| hsa-miR-128-3p | <a href="#">SOS1</a>    | SOS Ras/Rac guanine nucleotide exchange factor 1                            |
| hsa-miR-128-3p | <a href="#">FAM126A</a> | family with sequence similarity 126 member A                                |
| hsa-miR-128-3p | <a href="#">IRS1</a>    | insulin receptor substrate 1                                                |
| hsa-miR-128-3p | <a href="#">TTC39A</a>  | tetratricopeptide repeat domain 39A                                         |
| hsa-miR-128-3p | <a href="#">CEP76</a>   | centrosomal protein 76                                                      |
| hsa-miR-128-3p | <a href="#">PHB</a>     | prohibitin                                                                  |
| hsa-miR-128-3p | <a href="#">RNF182</a>  | ring finger protein 182                                                     |
| hsa-miR-128-3p | <a href="#">GATA6</a>   | GATA binding protein 6                                                      |
| hsa-miR-128-3p | <a href="#">AK2</a>     | adenylate kinase 2                                                          |
| hsa-miR-128-3p | <a href="#">PTPRB</a>   | protein tyrosine phosphatase, receptor type B                               |
| hsa-miR-128-3p | <a href="#">AK4</a>     | adenylate kinase 4                                                          |
| hsa-miR-128-3p | <a href="#">GXylT1</a>  | glucoside xylosyltransferase 1                                              |
| hsa-miR-128-3p | <a href="#">UGT8</a>    | UDP glycosyltransferase 8                                                   |
| hsa-miR-128-3p | <a href="#">NEO1</a>    | neogenin 1                                                                  |
| hsa-miR-128-3p | <a href="#">PDE3A</a>   | phosphodiesterase 3A                                                        |
| hsa-miR-128-3p | <a href="#">GRIN2D</a>  | glutamate ionotropic receptor NMDA type subunit 2D                          |
| hsa-miR-128-3p | <a href="#">ADCY2</a>   | adenylate cyclase 2                                                         |
| hsa-miR-128-3p | <a href="#">H3F3B</a>   | H3 histone family member 3B                                                 |
| hsa-miR-128-3p | <a href="#">ZNF704</a>  | zinc finger protein 704                                                     |
| hsa-miR-128-3p | <a href="#">TGFB1</a>   | transforming growth factor beta receptor 1                                  |
| hsa-miR-128-3p | <a href="#">XPR1</a>    | xenotropic and polytropic retrovirus receptor 1                             |
| hsa-miR-128-3p | <a href="#">CNOT6</a>   | CCR4-NOT transcription complex subunit 6                                    |
| hsa-miR-128-3p | <a href="#">NF1</a>     | neurofibromin 1                                                             |
| hsa-miR-128-3p | <a href="#">VEGFC</a>   | vascular endothelial growth factor C                                        |
| hsa-miR-128-3p | <a href="#">CXADR</a>   | CXADR, Ig-like cell adhesion molecule                                       |
| hsa-miR-128-3p | <a href="#">TRL</a>     | TLR4 interactor with leucine rich repeats                                   |
| hsa-miR-128-3p | <a href="#">ARMC8</a>   | armadillo repeat containing 8                                               |
| hsa-miR-128-3p | <a href="#">CABLES2</a> | Cdk5 and Abl enzyme substrate 2                                             |
| hsa-miR-128-3p | <a href="#">SETD7</a>   | SET domain containing 7, histone lysine methyltransferase                   |
| hsa-miR-128-3p | <a href="#">SPTY2D1</a> | SPT2 chromatin protein domain containing 1                                  |
| hsa-miR-128-3p | <a href="#">TTC9</a>    | tetratricopeptide repeat domain 9                                           |
| hsa-miR-128-3p | <a href="#">RCOR3</a>   | REST corepressor 3                                                          |
| hsa-miR-128-3p | <a href="#">PTPN9</a>   | protein tyrosine phosphatase, non-receptor type 9                           |
| hsa-miR-128-3p | <a href="#">USP42</a>   | ubiquitin specific peptidase 42                                             |
| hsa-miR-128-3p | <a href="#">EIF2S2</a>  | eukaryotic translation initiation factor 2 subunit beta                     |
| hsa-miR-128-3p | <a href="#">ABL2</a>    | ABL proto-oncogene 2, non-receptor tyrosine kinase                          |
| hsa-miR-128-3p | <a href="#">GALNT7</a>  | polypeptide N-acetylgalactosaminyltransferase 7                             |
| hsa-miR-128-3p | <a href="#">ROR1</a>    | receptor tyrosine kinase like orphan receptor 1                             |
| hsa-miR-128-3p | <a href="#">MIEF1</a>   | mitochondrial elongation factor 1                                           |
| hsa-miR-128-3p | <a href="#">USH2A</a>   | usherin                                                                     |
| hsa-miR-128-3p | <a href="#">YWHAB</a>   | tyrosine 3-monooxygenase/tryptophan 5-monooxygenase activation protein beta |



|                |                             |                                                                      |
|----------------|-----------------------------|----------------------------------------------------------------------|
| hsa-miR-128-3p | <a href="#">ERC2</a>        | ELKS/RAB6-interacting/CAST family member 2                           |
| hsa-miR-128-3p | <a href="#">ARHGEF38</a>    | Rho guanine nucleotide exchange factor 38                            |
| hsa-miR-128-3p | <a href="#">PDHX</a>        | pyruvate dehydrogenase complex component X                           |
| hsa-miR-128-3p | <a href="#">NEK2</a>        | NIMA related kinase 2                                                |
| hsa-miR-128-3p | <a href="#">ATP8A1</a>      | ATPase phospholipid transporting 8A1                                 |
| hsa-miR-128-3p | <a href="#">MAPK14</a>      | mitogen-activated protein kinase 14                                  |
| hsa-miR-128-3p | <a href="#">NXT2</a>        | nuclear transport factor 2 like export factor 2                      |
| hsa-miR-128-3p | <a href="#">NABP1</a>       | nucleic acid binding protein 1                                       |
| hsa-miR-128-3p | <a href="#">VANGL2</a>      | VANGL planar cell polarity protein 2                                 |
| hsa-miR-128-3p | <a href="#">STOX2</a>       | storkhead box 2                                                      |
| hsa-miR-128-3p | <a href="#">GRIK3</a>       | glutamate ionotropic receptor kainate type subunit 3                 |
| hsa-miR-128-3p | <a href="#">RNGTT</a>       | RNA guanylyltransferase and 5'-phosphatase                           |
| hsa-miR-128-3p | <a href="#">NFX1</a>        | nuclear transcription factor, X-box binding 1                        |
| hsa-miR-128-3p | <a href="#">RYBP</a>        | RING1 and YY1 binding protein                                        |
| hsa-miR-128-3p | <a href="#">COMMD3-BMI1</a> | COMMD3-BMI1 readthrough                                              |
| hsa-miR-128-3p | <a href="#">FBLN5</a>       | fibulin 5                                                            |
| hsa-miR-128-3p | <a href="#">SLC39A7</a>     | solute carrier family 39 member 7                                    |
| hsa-miR-128-3p | <a href="#">FOXA3</a>       | forkhead box A3                                                      |
| hsa-miR-128-3p | <a href="#">BAG2</a>        | BCL2 associated athanogene 2                                         |
| hsa-miR-128-3p | <a href="#">FRYL</a>        | FRY like transcription coactivator                                   |
| hsa-miR-128-3p | <a href="#">STK32A</a>      | serine/threonine kinase 32A                                          |
| hsa-miR-128-3p | <a href="#">PPM1E</a>       | protein phosphatase, Mg <sup>2+</sup> /Mn <sup>2+</sup> dependent 1E |
| hsa-miR-128-3p | <a href="#">STRN4</a>       | striatin 4                                                           |
| hsa-miR-128-3p | <a href="#">PLCH1</a>       | phospholipase C eta 1                                                |
| hsa-miR-128-3p | <a href="#">ARHGAP12</a>    | Rho GTPase activating protein 12                                     |
| hsa-miR-128-3p | <a href="#">HIC1</a>        | HIC ZBTB transcriptional repressor 1                                 |
| hsa-miR-128-3p | <a href="#">SNAP25</a>      | synaptosome associated protein 25                                    |
| hsa-miR-128-3p | <a href="#">CYP39A1</a>     | cytochrome P450 family 39 subfamily A member 1                       |
| hsa-miR-128-3p | <a href="#">EPHB2</a>       | EPH receptor B2                                                      |
| hsa-miR-128-3p | <a href="#">COL27A1</a>     | collagen type XXVII alpha 1 chain                                    |
| hsa-miR-128-3p | <a href="#">KDM3A</a>       | lysine demethylase 3A                                                |
| hsa-miR-128-3p | <a href="#">AMER2</a>       | APC membrane recruitment protein 2                                   |
| hsa-miR-128-3p | <a href="#">PHF24</a>       | PHD finger protein 24                                                |
| hsa-miR-128-3p | <a href="#">FAM126B</a>     | family with sequence similarity 126 member B                         |
| hsa-miR-128-3p | <a href="#">MDN1</a>        | midasin AAA ATPase 1                                                 |
| hsa-miR-128-3p | <a href="#">RAB20</a>       | RAB20, member RAS oncogene family                                    |
| hsa-miR-128-3p | <a href="#">EML1</a>        | EMAP like 1                                                          |
| hsa-miR-128-3p | <a href="#">ISL1</a>        | ISL LIM homeobox 1                                                   |
| hsa-miR-128-3p | <a href="#">RNF38</a>       | ring finger protein 38                                               |
| hsa-miR-128-3p | <a href="#">USP49</a>       | ubiquitin specific peptidase 49                                      |
| hsa-miR-128-3p | <a href="#">TMEM64</a>      | transmembrane protein 64                                             |
| hsa-miR-128-3p | <a href="#">PPFIA2</a>      | PTPRF interacting protein alpha 2                                    |
| hsa-miR-128-3p | <a href="#">SCAI</a>        | suppressor of cancer cell invasion                                   |
| hsa-miR-128-3p | <a href="#">SFXN2</a>       | sideroflexin 2                                                       |
| hsa-miR-128-3p | <a href="#">SORL1</a>       | sortilin related receptor 1                                          |

|                |                           |                                                                 |
|----------------|---------------------------|-----------------------------------------------------------------|
| hsa-miR-128-3p | <a href="#">TMEM167A</a>  | transmembrane protein 167A                                      |
| hsa-miR-128-3p | <a href="#">ZNF652</a>    | zinc finger protein 652                                         |
| hsa-miR-128-3p | <a href="#">UGCG</a>      | UDP-glucose ceramide glucosyltransferase                        |
| hsa-miR-128-3p | <a href="#">MET</a>       | MET proto-oncogene, receptor tyrosine kinase                    |
| hsa-miR-128-3p | <a href="#">ARHGAP32</a>  | Rho GTPase activating protein 32                                |
| hsa-miR-128-3p | <a href="#">RET</a>       | ret proto-oncogene                                              |
| hsa-miR-128-3p | <a href="#">CASC3</a>     | CASC3, exon junction complex subunit                            |
| hsa-miR-128-3p | <a href="#">SLC7A11</a>   | solute carrier family 7 member 11                               |
| hsa-miR-128-3p | <a href="#">BAZ2B</a>     | bromodomain adjacent to zinc finger domain 2B                   |
| hsa-miR-128-3p | <a href="#">PLAGL2</a>    | PLAG1 like zinc finger 2                                        |
| hsa-miR-128-3p | <a href="#">RECK</a>      | reversion inducing cysteine rich protein with kazal motifs      |
| hsa-miR-128-3p | <a href="#">NAA50</a>     | N(alpha)-acetyltransferase 50, NatE catalytic subunit           |
| hsa-miR-128-3p | <a href="#">MED12L</a>    | mediator complex subunit 12 like                                |
| hsa-miR-128-3p | <a href="#">SH2D3C</a>    | SH2 domain containing 3C                                        |
| hsa-miR-128-3p | <a href="#">FAM155A</a>   | family with sequence similarity 155 member A                    |
| hsa-miR-128-3p | <a href="#">GRIA4</a>     | glutamate ionotropic receptor AMPA type subunit 4               |
| hsa-miR-128-3p | <a href="#">C20orf194</a> | chromosome 20 open reading frame 194                            |
| hsa-miR-128-3p | <a href="#">WNK1</a>      | WNK lysine deficient protein kinase 1                           |
| hsa-miR-128-3p | <a href="#">PLCL2</a>     | phospholipase C like 2                                          |
| hsa-miR-128-3p | <a href="#">MAPK8IP3</a>  | mitogen-activated protein kinase 8 interacting protein 3        |
| hsa-miR-128-3p | <a href="#">CECR2</a>     | CECR2, histone acetyl-lysine reader                             |
| hsa-miR-128-3p | <a href="#">PDPK1</a>     | 3-phosphoinositide dependent protein kinase 1                   |
| hsa-miR-128-3p | <a href="#">ZFP36L1</a>   | ZFP36 ring finger protein like 1                                |
| hsa-miR-128-3p | <a href="#">IRF4</a>      | interferon regulatory factor 4                                  |
| hsa-miR-128-3p | <a href="#">LTBP1</a>     | latent transforming growth factor beta binding protein 1        |
| hsa-miR-128-3p | <a href="#">CLPP</a>      | caseinolytic mitochondrial matrix peptidase proteolytic subunit |
| hsa-miR-128-3p | <a href="#">ZFXH3</a>     | zinc finger homeobox 3                                          |
| hsa-miR-128-3p | <a href="#">VPS4B</a>     | vacuolar protein sorting 4 homolog B                            |
| hsa-miR-128-3p | <a href="#">SNX12</a>     | sorting nexin 12                                                |
| hsa-miR-128-3p | <a href="#">GREM1</a>     | gremlin 1, DAN family BMP antagonist                            |
| hsa-miR-128-3p | <a href="#">NRBF2</a>     | nuclear receptor binding factor 2                               |
| hsa-miR-128-3p | <a href="#">NUS1</a>      | NUS1, dehydrolipidyl diphosphate synthase subunit               |
| hsa-miR-128-3p | <a href="#">PDE10A</a>    | phosphodiesterase 10A                                           |
| hsa-miR-128-3p | <a href="#">RASGEF1B</a>  | RasGEF domain family member 1B                                  |
| hsa-miR-128-3p | <a href="#">RHOT2</a>     | ras homolog family member T2                                    |
| hsa-miR-128-3p | <a href="#">CDIP1</a>     | cell death inducing p53 target 1                                |
| hsa-miR-128-3p | <a href="#">SH3BGRL2</a>  | SH3 domain binding glutamate rich protein like 2                |
| hsa-miR-128-3p | <a href="#">FEM1B</a>     | fem-1 homolog B                                                 |
| hsa-miR-128-3p | <a href="#">UNC80</a>     | unc-80 homolog, NALCN channel complex subunit                   |
| hsa-miR-128-3p | <a href="#">RELN</a>      | reelin                                                          |
| hsa-miR-128-3p | <a href="#">ABCA12</a>    | ATP binding cassette subfamily A member 12                      |
| hsa-miR-128-3p | <a href="#">IGSF3</a>     | immunoglobulin superfamily member 3                             |
| hsa-miR-128-3p | <a href="#">DIRAS1</a>    | DIRAS family GTPase 1                                           |
| hsa-miR-128-3p | <a href="#">CDH24</a>     | cadherin 24                                                     |
| hsa-miR-128-3p | <a href="#">ZNF800</a>    | zinc finger protein 800                                         |

|                |                           |                                                                                                   |
|----------------|---------------------------|---------------------------------------------------------------------------------------------------|
| hsa-miR-128-3p | <a href="#">PDE7B</a>     | phosphodiesterase 7B                                                                              |
| hsa-miR-128-3p | <a href="#">PTPRT</a>     | protein tyrosine phosphatase, receptor type T                                                     |
| hsa-miR-128-3p | <a href="#">SP1</a>       | Sp1 transcription factor                                                                          |
| hsa-miR-128-3p | <a href="#">RNF144A</a>   | ring finger protein 144A                                                                          |
| hsa-miR-128-3p | <a href="#">SAMD10</a>    | sterile alpha motif domain containing 10                                                          |
| hsa-miR-128-3p | <a href="#">MAPKAPK3</a>  | mitogen-activated protein kinase-activated protein kinase 3                                       |
| hsa-miR-128-3p | <a href="#">ARHGAP21</a>  | Rho GTPase activating protein 21                                                                  |
| hsa-miR-128-3p | <a href="#">SMARCA2</a>   | SWI/SNF related, matrix associated, actin dependent regulator of chromatin, subfamily a, member 2 |
| hsa-miR-128-3p | <a href="#">FAM155B</a>   | family with sequence similarity 155 member B                                                      |
| hsa-miR-128-3p | <a href="#">SEC24A</a>    | SEC24 homolog A, COPII coat complex component                                                     |
| hsa-miR-128-3p | <a href="#">CREB1</a>     | cAMP responsive element binding protein 1                                                         |
| hsa-miR-128-3p | <a href="#">NSD1</a>      | nuclear receptor binding SET domain protein 1                                                     |
| hsa-miR-128-3p | <a href="#">RSBN1L</a>    | round spermatid basic protein 1 like                                                              |
| hsa-miR-128-3p | <a href="#">CCNC</a>      | cyclin C                                                                                          |
| hsa-miR-128-3p | <a href="#">IL13RA1</a>   | interleukin 13 receptor subunit alpha 1                                                           |
| hsa-miR-128-3p | <a href="#">ABCB9</a>     | ATP binding cassette subfamily B member 9                                                         |
| hsa-miR-128-3p | <a href="#">PGAP1</a>     | post-GPI attachment to proteins 1                                                                 |
| hsa-miR-128-3p | <a href="#">KBTBD11</a>   | kelch repeat and BTB domain containing 11                                                         |
| hsa-miR-128-3p | <a href="#">UBR1</a>      | ubiquitin protein ligase E3 component n-recognin 1                                                |
| hsa-miR-128-3p | <a href="#">LITAF</a>     | lipopolysaccharide induced TNF factor                                                             |
| hsa-miR-128-3p | <a href="#">H3F3C</a>     | H3 histone family member 3C                                                                       |
| hsa-miR-128-3p | <a href="#">UBE2W</a>     | ubiquitin conjugating enzyme E2 W                                                                 |
| hsa-miR-128-3p | <a href="#">PIH1D3</a>    | PIH1 domain containing 3                                                                          |
| hsa-miR-128-3p | <a href="#">COL21A1</a>   | collagen type XXI alpha 1 chain                                                                   |
| hsa-miR-128-3p | <a href="#">MEGF11</a>    | multiple EGF like domains 11                                                                      |
| hsa-miR-128-3p | <a href="#">C20orf202</a> | chromosome 20 open reading frame 202                                                              |
| hsa-miR-128-3p | <a href="#">NREP</a>      | neuronal regeneration related protein                                                             |
| hsa-miR-128-3p | <a href="#">MSL1</a>      | MSL complex subunit 1                                                                             |
| hsa-miR-128-3p | <a href="#">CA10</a>      | carbonic anhydrase 10                                                                             |
| hsa-miR-128-3p | <a href="#">DCC</a>       | DCC netrin 1 receptor                                                                             |
| hsa-miR-128-3p | <a href="#">PPP4C</a>     | protein phosphatase 4 catalytic subunit                                                           |
| hsa-miR-128-3p | <a href="#">MTMR4</a>     | myotubularin related protein 4                                                                    |
| hsa-miR-128-3p | <a href="#">UBE2N</a>     | ubiquitin conjugating enzyme E2 N                                                                 |
| hsa-miR-128-3p | <a href="#">GLTP</a>      | glycolipid transfer protein                                                                       |
| hsa-miR-128-3p | <a href="#">PPME1</a>     | protein phosphatase methylesterase 1                                                              |
| hsa-miR-128-3p | <a href="#">SYT1</a>      | synaptotagmin 1                                                                                   |
| hsa-miR-128-3p | <a href="#">TMEM30A</a>   | transmembrane protein 30A                                                                         |
| hsa-miR-128-3p | <a href="#">WDR7</a>      | WD repeat domain 7                                                                                |
| hsa-miR-128-3p | <a href="#">STK24</a>     | serine/threonine kinase 24                                                                        |
| hsa-miR-128-3p | <a href="#">ATXN10</a>    | ataxin 10                                                                                         |
| hsa-miR-128-3p | <a href="#">GCC2</a>      | GRIP and coiled-coil domain containing 2                                                          |
| hsa-miR-128-3p | <a href="#">FBXW7</a>     | F-box and WD repeat domain containing 7                                                           |
| hsa-miR-128-3p | <a href="#">CCNT2</a>     | cyclin T2                                                                                         |
| hsa-miR-128-3p | <a href="#">DCP1A</a>     | decapping mRNA 1A                                                                                 |

|                |                          |                                                             |
|----------------|--------------------------|-------------------------------------------------------------|
| hsa-miR-128-3p | <a href="#">FAM177A1</a> | family with sequence similarity 177 member A1               |
| hsa-miR-128-3p | <a href="#">PNKD</a>     | PNKD, MBL domain containing                                 |
| hsa-miR-128-3p | <a href="#">AMD1</a>     | adenosylmethionine decarboxylase 1                          |
| hsa-miR-128-3p | <a href="#">CTDSP2</a>   | CTD small phosphatase 2                                     |
| hsa-miR-128-3p | <a href="#">MBTD1</a>    | mbt domain containing 1                                     |
| hsa-miR-128-3p | <a href="#">OSBPL10</a>  | oxysterol binding protein like 10                           |
| hsa-miR-128-3p | <a href="#">BCORL1</a>   | BCL6 corepressor like 1                                     |
| hsa-miR-128-3p | <a href="#">VANGL1</a>   | VANGL planar cell polarity protein 1                        |
| hsa-miR-128-3p | <a href="#">TXNIP</a>    | thioredoxin interacting protein                             |
| hsa-miR-128-3p | <a href="#">SREK1</a>    | splicing regulatory glutamic acid and lysine rich protein 1 |
| hsa-miR-128-3p | <a href="#">FNDC4</a>    | fibronectin type III domain containing 4                    |
| hsa-miR-128-3p | <a href="#">SOX7</a>     | SRY-box 7                                                   |
| hsa-miR-128-3p | <a href="#">C1QTNF7</a>  | C1q and TNF related 7                                       |
| hsa-miR-128-3p | <a href="#">KCNN3</a>    | potassium calcium-activated channel subfamily N member 3    |
| hsa-miR-128-3p | <a href="#">RPS6KB1</a>  | ribosomal protein S6 kinase B1                              |
| hsa-miR-128-3p | <a href="#">TRIM23</a>   | tripartite motif containing 23                              |
| hsa-miR-128-3p | <a href="#">FBLN2</a>    | fibulin 2                                                   |
| hsa-miR-128-3p | <a href="#">DISC1</a>    | DISC1 scaffold protein                                      |
| hsa-miR-128-3p | <a href="#">SEC61A1</a>  | Sec61 translocon alpha 1 subunit                            |
| hsa-miR-128-3p | <a href="#">SGMS1</a>    | sphingomyelin synthase 1                                    |
| hsa-miR-128-3p | <a href="#">MDH1B</a>    | malate dehydrogenase 1B                                     |
| hsa-miR-128-3p | <a href="#">SLC35F3</a>  | solute carrier family 35 member F3                          |
| hsa-miR-128-3p | <a href="#">ANKRD40</a>  | ankyrin repeat domain 40                                    |
| hsa-miR-128-3p | <a href="#">ABHD17C</a>  | abhydrolase domain containing 17C                           |
| hsa-miR-128-3p | <a href="#">SIRT1</a>    | sirtuin 1                                                   |
| hsa-miR-128-3p | <a href="#">GSPT1</a>    | G1 to S phase transition 1                                  |
| hsa-miR-128-3p | <a href="#">NAV2</a>     | neuron navigator 2                                          |
| hsa-miR-128-3p | <a href="#">NEMP2</a>    | nuclear envelope integral membrane protein 2                |
| hsa-miR-128-3p | <a href="#">CKAP4</a>    | cytoskeleton associated protein 4                           |
| hsa-miR-128-3p | <a href="#">ITGA5</a>    | integrin subunit alpha 5                                    |
| hsa-miR-128-3p | <a href="#">AKR7A2</a>   | aldo-keto reductase family 7 member A2                      |
| hsa-miR-128-3p | <a href="#">ADAMTS5</a>  | ADAM metalloproteinase with thrombospondin type 1 motif 5   |
| hsa-miR-128-3p | <a href="#">GALNT3</a>   | polypeptide N-acetylgalactosaminyltransferase 3             |
| hsa-miR-128-3p | <a href="#">PROSER2</a>  | proline and serine rich 2                                   |
| hsa-miR-128-3p | <a href="#">SP2</a>      | Sp2 transcription factor                                    |
| hsa-miR-128-3p | <a href="#">GRM5</a>     | glutamate metabotropic receptor 5                           |
| hsa-miR-128-3p | <a href="#">SPG21</a>    | SPG21, maspardin                                            |
| hsa-miR-128-3p | <a href="#">ZNF618</a>   | zinc finger protein 618                                     |
| hsa-miR-128-3p | <a href="#">HECTD1</a>   | HECT domain E3 ubiquitin protein ligase 1                   |
| hsa-miR-128-3p | <a href="#">SSH1</a>     | slingshot protein phosphatase 1                             |
| hsa-miR-128-3p | <a href="#">RAP1B</a>    | RAP1B, member of RAS oncogene family                        |
| hsa-miR-128-3p | <a href="#">SAMD12</a>   | sterile alpha motif domain containing 12                    |
| hsa-miR-128-3p | <a href="#">UBA6</a>     | ubiquitin like modifier activating enzyme 6                 |
| hsa-miR-128-3p | <a href="#">HOXA5</a>    | homeobox A5                                                 |
| hsa-miR-128-3p | <a href="#">IAG1</a>     | jagged 1                                                    |

|                |                            |                                                                         |
|----------------|----------------------------|-------------------------------------------------------------------------|
| hsa-miR-128-3p | <a href="#">HAPLN1</a>     | hyaluronan and proteoglycan link protein 1                              |
| hsa-miR-128-3p | <a href="#">RND3</a>       | Rho family GTPase 3                                                     |
| hsa-miR-128-3p | <a href="#">EFR3A</a>      | EFR3 homolog A                                                          |
| hsa-miR-128-3p | <a href="#">MATN3</a>      | matrilin 3                                                              |
| hsa-miR-128-3p | <a href="#">N4BP1</a>      | NEDD4 binding protein 1                                                 |
| hsa-miR-128-3p | <a href="#">MLLT10</a>     | MLLT10, histone lysine methyltransferase DOT1L cofactor                 |
| hsa-miR-128-3p | <a href="#">SH3RF1</a>     | SH3 domain containing ring finger 1                                     |
| hsa-miR-128-3p | <a href="#">ZKSCAN2</a>    | zinc finger with KRAB and SCAN domains 2                                |
| hsa-miR-128-3p | <a href="#">CEMIP</a>      | cell migration inducing hyaluronidase 1                                 |
| hsa-miR-128-3p | <a href="#">RERE</a>       | arginine-glutamic acid dipeptide repeats                                |
| hsa-miR-128-3p | <a href="#">ERLEC1</a>     | endoplasmic reticulum lectin 1                                          |
| hsa-miR-128-3p | <a href="#">GABBR2</a>     | gamma-aminobutyric acid type B receptor subunit 2                       |
| hsa-miR-128-3p | <a href="#">ZFP82</a>      | ZFP82 zinc finger protein                                               |
| hsa-miR-128-3p | <a href="#">AFF3</a>       | AF4/FMR2 family member 3                                                |
| hsa-miR-128-3p | <a href="#">GSK3B</a>      | glycogen synthase kinase 3 beta                                         |
| hsa-miR-128-3p | <a href="#">MYT1</a>       | myelin transcription factor 1                                           |
| hsa-miR-128-3p | <a href="#">BMI1</a>       | BMI1 proto-oncogene, polycomb ring finger                               |
| hsa-miR-128-3p | <a href="#">LYPD3</a>      | LY6/PLAUR domain containing 3                                           |
| hsa-miR-128-3p | <a href="#">TMC7</a>       | transmembrane channel like 7                                            |
| hsa-miR-128-3p | <a href="#">TMEM25</a>     | transmembrane protein 25                                                |
| hsa-miR-128-3p | <a href="#">INO80D</a>     | INO80 complex subunit D                                                 |
| hsa-miR-128-3p | <a href="#">CACNA2D3</a>   | calcium voltage-gated channel auxiliary subunit alpha2delta 3           |
| hsa-miR-128-3p | <a href="#">ITPKC</a>      | inositol-trisphosphate 3-kinase C                                       |
| hsa-miR-128-3p | <a href="#">MMD</a>        | monocyte to macrophage differentiation associated                       |
| hsa-miR-128-3p | <a href="#">ST6GALNAC3</a> | ST6 N-acetylgalactosaminide alpha-2,6-sialyltransferase 3               |
| hsa-miR-128-3p | <a href="#">MAP2K7</a>     | mitogen-activated protein kinase kinase 7                               |
| hsa-miR-128-3p | <a href="#">SLC35F1</a>    | solute carrier family 35 member F1                                      |
| hsa-miR-128-3p | <a href="#">WEE1</a>       | WEE1 G2 checkpoint kinase                                               |
| hsa-miR-128-3p | <a href="#">LBH</a>        | limb bud and heart development                                          |
| hsa-miR-128-3p | <a href="#">PAX9</a>       | paired box 9                                                            |
| hsa-miR-128-3p | <a href="#">FBXO30</a>     | F-box protein 30                                                        |
| hsa-miR-128-3p | <a href="#">PDS5B</a>      | PDS5 cohesin associated factor B                                        |
| hsa-miR-128-3p | <a href="#">NEUROD6</a>    | neuronal differentiation 6                                              |
| hsa-miR-128-3p | <a href="#">APOLD1</a>     | apolipoprotein L domain containing 1                                    |
| hsa-miR-128-3p | <a href="#">EPB41L1</a>    | erythrocyte membrane protein band 4.1 like 1                            |
| hsa-miR-128-3p | <a href="#">COPB2</a>      | coatamer protein complex subunit beta 2                                 |
| hsa-miR-128-3p | <a href="#">STX7</a>       | syntaxin 7                                                              |
| hsa-miR-128-3p | <a href="#">MINPP1</a>     | multiple inositol-polyphosphate phosphatase 1                           |
| hsa-miR-128-3p | <a href="#">PLPPR1</a>     | phospholipid phosphatase related 1                                      |
| hsa-miR-128-3p | <a href="#">MNT</a>        | MAX network transcriptional repressor                                   |
| hsa-miR-128-3p | <a href="#">ALDH4A1</a>    | aldehyde dehydrogenase 4 family member A1                               |
| hsa-miR-128-3p | <a href="#">CA7</a>        | carbonic anhydrase 7                                                    |
| hsa-miR-128-3p | <a href="#">FAM78A</a>     | family with sequence similarity 78 member A                             |
| hsa-miR-128-3p | <a href="#">HCN4</a>       | hyperpolarization activated cyclic nucleotide gated potassium channel 4 |

|                |                          |                                                               |
|----------------|--------------------------|---------------------------------------------------------------|
| hsa-miR-128-3p | <a href="#">DCX</a>      | doublecortin                                                  |
| hsa-miR-128-3p | <a href="#">EYA4</a>     | EYA transcriptional coactivator and phosphatase 4             |
| hsa-miR-128-3p | <a href="#">GNS</a>      | glucosamine (N-acetyl)-6-sulfatase                            |
| hsa-miR-128-3p | <a href="#">NPTXR</a>    | neuronal pentraxin receptor                                   |
| hsa-miR-128-3p | <a href="#">HMBOX1</a>   | homeobox containing 1                                         |
| hsa-miR-128-3p | <a href="#">IFITM10</a>  | interferon induced transmembrane protein 10                   |
| hsa-miR-128-3p | <a href="#">GPATCH2L</a> | G-patch domain containing 2 like                              |
| hsa-miR-128-3p | <a href="#">MOSPD3</a>   | motile sperm domain containing 3                              |
| hsa-miR-128-3p | <a href="#">LHFPL3</a>   | LHFPL tetraspan subfamily member 3                            |
| hsa-miR-128-3p | <a href="#">ING5</a>     | inhibitor of growth family member 5                           |
| hsa-miR-128-3p | <a href="#">RETREG1</a>  | reticulophagy regulator 1                                     |
| hsa-miR-128-3p | <a href="#">MTSS1L</a>   | MTSS1L, I-BAR domain containing                               |
| hsa-miR-128-3p | <a href="#">C1orf21</a>  | chromosome 1 open reading frame 21                            |
| hsa-miR-128-3p | <a href="#">ST14</a>     | suppression of tumorigenicity 14                              |
| hsa-miR-128-3p | <a href="#">ARF3</a>     | ADP ribosylation factor 3                                     |
| hsa-miR-128-3p | <a href="#">SOCS6</a>    | suppressor of cytokine signaling 6                            |
| hsa-miR-128-3p | <a href="#">OPA1</a>     | OPA1, mitochondrial dynamin like GTPase                       |
| hsa-miR-128-3p | <a href="#">ZC3H12D</a>  | zinc finger CCCH-type containing 12D                          |
| hsa-miR-128-3p | <a href="#">DPY19L3</a>  | dpy-19 like C-mannosyltransferase 3                           |
| hsa-miR-128-3p | <a href="#">CHTF8</a>    | chromosome transmission fidelity factor 8                     |
| hsa-miR-128-3p | <a href="#">CCDC92</a>   | coiled-coil domain containing 92                              |
| hsa-miR-128-3p | <a href="#">MIPOL1</a>   | mirror-image polydactyly 1                                    |
| hsa-miR-128-3p | <a href="#">COLGALT2</a> | collagen beta(1-O)galactosyltransferase 2                     |
| hsa-miR-128-3p | <a href="#">CRKL</a>     | CRK like proto-oncogene, adaptor protein                      |
| hsa-miR-128-3p | <a href="#">MED14</a>    | mediator complex subunit 14                                   |
| hsa-miR-128-3p | <a href="#">WBP1L</a>    | WW domain binding protein 1 like                              |
| hsa-miR-128-3p | <a href="#">GIGYF2</a>   | GRB10 interacting GYF protein 2                               |
| hsa-miR-128-3p | <a href="#">SOGA1</a>    | suppressor of glucose, autophagy associated 1                 |
| hsa-miR-128-3p | <a href="#">KIRREL1</a>  | kirre like nephrin family adhesion molecule 1                 |
| hsa-miR-128-3p | <a href="#">KLHDC8A</a>  | kelch domain containing 8A                                    |
| hsa-miR-128-3p | <a href="#">KAT7</a>     | lysine acetyltransferase 7                                    |
| hsa-miR-128-3p | <a href="#">ARID1B</a>   | AT-rich interaction domain 1B                                 |
| hsa-miR-128-3p | <a href="#">CLDN18</a>   | claudin 18                                                    |
| hsa-miR-128-3p | <a href="#">TCEA1</a>    | transcription elongation factor A1                            |
| hsa-miR-128-3p | <a href="#">ZBTB20</a>   | zinc finger and BTB domain containing 20                      |
| hsa-miR-128-3p | <a href="#">SLC39A11</a> | solute carrier family 39 member 11                            |
| hsa-miR-128-3p | <a href="#">STIM2</a>    | stromal interaction molecule 2                                |
| hsa-miR-128-3p | <a href="#">SCAF11</a>   | SR-related CTD associated factor 11                           |
| hsa-miR-128-3p | <a href="#">LPAR6</a>    | lysophosphatidic acid receptor 6                              |
| hsa-miR-128-3p | <a href="#">SMAD9</a>    | SMAD family member 9                                          |
| hsa-miR-128-3p | <a href="#">NDST1</a>    | N-deacetylase and N-sulfotransferase 1                        |
| hsa-miR-128-3p | <a href="#">DHTKD1</a>   | dehydrogenase E1 and transketolase domain containing 1        |
| hsa-miR-128-3p | <a href="#">B3GNT7</a>   | UDP-GlcNAc:betaGal beta-1,3-N-acetylglucosaminyltransferase 7 |
| hsa-miR-128-3p | <a href="#">SLIT2</a>    | slit guidance ligand 2                                        |
| hsa-miR-128-3p | <a href="#">TMEM87A</a>  | transmembrane protein 87A                                     |



|                |                           |                                                          |
|----------------|---------------------------|----------------------------------------------------------|
| hsa-miR-128-3p | <a href="#">REPS1</a>     | RALBP1 associated Eps domain containing 1                |
| hsa-miR-128-3p | <a href="#">F3</a>        | coagulation factor III, tissue factor                    |
| hsa-miR-128-3p | <a href="#">EPB41L4A</a>  | erythrocyte membrane protein band 4.1 like 4A            |
| hsa-miR-128-3p | <a href="#">HIP1</a>      | huntingtin interacting protein 1                         |
| hsa-miR-128-3p | <a href="#">USP46</a>     | ubiquitin specific peptidase 46                          |
| hsa-miR-128-3p | <a href="#">SHTN1</a>     | shootin 1                                                |
| hsa-miR-128-3p | <a href="#">GTF2A2</a>    | general transcription factor IIA subunit 2               |
| hsa-miR-128-3p | <a href="#">ASPH</a>      | aspartate beta-hydroxylase                               |
| hsa-miR-128-3p | <a href="#">GPD2</a>      | glycerol-3-phosphate dehydrogenase 2                     |
| hsa-miR-128-3p | <a href="#">MARK4</a>     | microtubule affinity regulating kinase 4                 |
| hsa-miR-128-3p | <a href="#">SASH1</a>     | SAM and SH3 domain containing 1                          |
| hsa-miR-128-3p | <a href="#">SLC26A11</a>  | solute carrier family 26 member 11                       |
| hsa-miR-128-3p | <a href="#">ITCH</a>      | itchy E3 ubiquitin protein ligase                        |
| hsa-miR-128-3p | <a href="#">KIAA1109</a>  | KIAA1109                                                 |
| hsa-miR-128-3p | <a href="#">SLC5A3</a>    | solute carrier family 5 member 3                         |
| hsa-miR-128-3p | <a href="#">NKX3-1</a>    | NK3 homeobox 1                                           |
| hsa-miR-128-3p | <a href="#">DPY19L4</a>   | dpy-19 like 4                                            |
| hsa-miR-128-3p | <a href="#">SNX18</a>     | sorting nexin 18                                         |
| hsa-miR-128-3p | <a href="#">DPP10</a>     | dipeptidyl peptidase like 10                             |
| hsa-miR-128-3p | <a href="#">RCAN2</a>     | regulator of calcineurin 2                               |
| hsa-miR-128-3p | <a href="#">G6PC3</a>     | glucose-6-phosphatase catalytic subunit 3                |
| hsa-miR-128-3p | <a href="#">TPPP</a>      | tubulin polymerization promoting protein                 |
| hsa-miR-128-3p | <a href="#">LIMK1</a>     | LIM domain kinase 1                                      |
| hsa-miR-128-3p | <a href="#">CBLB</a>      | Cbl proto-oncogene B                                     |
| hsa-miR-128-3p | <a href="#">ENAH</a>      | ENAH, actin regulator                                    |
| hsa-miR-128-3p | <a href="#">KMT2A</a>     | lysine methyltransferase 2A                              |
| hsa-miR-128-3p | <a href="#">SKA3</a>      | spindle and kinetochore associated complex subunit 3     |
| hsa-miR-128-3p | <a href="#">COL5A1</a>    | collagen type V alpha 1 chain                            |
| hsa-miR-128-3p | <a href="#">ONECUT2</a>   | one cut homeobox 2                                       |
| hsa-miR-128-3p | <a href="#">MME</a>       | membrane metalloendopeptidase                            |
| hsa-miR-128-3p | <a href="#">FXR2</a>      | FMR1 autosomal homolog 2                                 |
| hsa-miR-128-3p | <a href="#">SLC24A4</a>   | solute carrier family 24 member 4                        |
| hsa-miR-128-3p | <a href="#">SPATA17</a>   | spermatogenesis associated 17                            |
| hsa-miR-128-3p | <a href="#">FSD2</a>      | fibronectin type III and SPRY domain containing 2        |
| hsa-miR-128-3p | <a href="#">CSRP2</a>     | cysteine and glycine rich protein 2                      |
| hsa-miR-128-3p | <a href="#">APBA2</a>     | amyloid beta precursor protein binding family A member 2 |
| hsa-miR-128-3p | <a href="#">CNTLN</a>     | centlein                                                 |
| hsa-miR-128-3p | <a href="#">ELMO1</a>     | engulfment and cell motility 1                           |
| hsa-miR-128-3p | <a href="#">NRXN1</a>     | neurexin 1                                               |
| hsa-miR-128-3p | <a href="#">MCF2L</a>     | MCF.2 cell line derived transforming sequence like       |
| hsa-miR-128-3p | <a href="#">RAB11FIP1</a> | RAB11 family interacting protein 1                       |
| hsa-miR-128-3p | <a href="#">UTP15</a>     | UTP15, small subunit processome component                |
| hsa-miR-128-3p | <a href="#">GAPT</a>      | GRB2 binding adaptor protein, transmembrane              |
| hsa-miR-128-3p | <a href="#">RAB39B</a>    | RAB39B, member RAS oncogene family                       |
| hsa-miR-128-3p | <a href="#">STK35</a>     | serine/threonine kinase 35                               |

|                |                           |                                                              |
|----------------|---------------------------|--------------------------------------------------------------|
| hsa-miR-128-3p | <a href="#">ECE1</a>      | endothelin converting enzyme 1                               |
| hsa-miR-128-3p | <a href="#">MSTO1</a>     | misato mitochondrial distribution and morphology regulator 1 |
| hsa-miR-128-3p | <a href="#">TNFRSF10D</a> | TNF receptor superfamily member 10d                          |
| hsa-miR-128-3p | <a href="#">BICC1</a>     | BicC family RNA binding protein 1                            |
| hsa-miR-128-3p | <a href="#">NEURL4</a>    | neuralized E3 ubiquitin protein ligase 4                     |
| hsa-miR-128-3p | <a href="#">RARA</a>      | retinoic acid receptor alpha                                 |
| hsa-miR-128-3p | <a href="#">WNT3A</a>     | Wnt family member 3A                                         |
| hsa-miR-128-3p | <a href="#">MBOAT2</a>    | membrane bound O-acyltransferase domain containing 2         |
| hsa-miR-128-3p | <a href="#">PPP1CC</a>    | protein phosphatase 1 catalytic subunit gamma                |
| hsa-miR-128-3p | <a href="#">NRP2</a>      | neuropilin 2                                                 |
| hsa-miR-128-3p | <a href="#">CA12</a>      | carbonic anhydrase 12                                        |
| hsa-miR-128-3p | <a href="#">TTC39B</a>    | tetratricopeptide repeat domain 39B                          |
| hsa-miR-128-3p | <a href="#">SERTAD2</a>   | SERTA domain containing 2                                    |
| hsa-miR-128-3p | <a href="#">MIER2</a>     | MIER family member 2                                         |
| hsa-miR-128-3p | <a href="#">SAMD9L</a>    | sterile alpha motif domain containing 9 like                 |
| hsa-miR-128-3p | <a href="#">CCNK</a>      | cyclin K                                                     |
| hsa-miR-128-3p | <a href="#">E2F7</a>      | E2F transcription factor 7                                   |
| hsa-miR-128-3p | <a href="#">MTDH</a>      | metadherin                                                   |
| hsa-miR-128-3p | <a href="#">OPHN1</a>     | oligophrenin 1                                               |
| hsa-miR-128-3p | <a href="#">GLRA2</a>     | glycine receptor alpha 2                                     |
| hsa-miR-128-3p | <a href="#">STAG1</a>     | stromal antigen 1                                            |
| hsa-miR-128-3p | <a href="#">ZDHHC17</a>   | zinc finger DHHC-type containing 17                          |
| hsa-miR-128-3p | <a href="#">SLC39A13</a>  | solute carrier family 39 member 13                           |
| hsa-miR-128-3p | <a href="#">UBN2</a>      | ubinuclein 2                                                 |
| hsa-miR-128-3p | <a href="#">PITPNM2</a>   | phosphatidylinositol transfer protein membrane associated 2  |
| hsa-miR-128-3p | <a href="#">GEM</a>       | GTP binding protein overexpressed in skeletal muscle         |
| hsa-miR-128-3p | <a href="#">SMAD2</a>     | SMAD family member 2                                         |
| hsa-miR-128-3p | <a href="#">TSR1</a>      | TSR1, ribosome maturation factor                             |
| hsa-miR-128-3p | <a href="#">PANK1</a>     | pantothenate kinase 1                                        |
| hsa-miR-128-3p | <a href="#">ZNF705E</a>   | zinc finger protein 705E                                     |
| hsa-miR-128-3p | <a href="#">KCNA1</a>     | potassium voltage-gated channel subfamily A member 1         |
| hsa-miR-128-3p | <a href="#">TET1</a>      | tet methylcytosine dioxygenase 1                             |
| hsa-miR-128-3p | <a href="#">UBE2V1</a>    | ubiquitin conjugating enzyme E2 V1                           |
| hsa-miR-128-3p | <a href="#">YAF2</a>      | YY1 associated factor 2                                      |
| hsa-miR-128-3p | <a href="#">DYNLL2</a>    | dynein light chain LC8-type 2                                |
| hsa-miR-128-3p | <a href="#">PLD6</a>      | phospholipase D family member 6                              |
| hsa-miR-128-3p | <a href="#">DBF4B</a>     | DBF4 zinc finger B                                           |
| hsa-miR-128-3p | <a href="#">AARD</a>      | alanine and arginine rich domain containing protein          |
| hsa-miR-128-3p | <a href="#">NCOA7</a>     | nuclear receptor coactivator 7                               |
| hsa-miR-128-3p | <a href="#">FAM102A</a>   | family with sequence similarity 102 member A                 |
| hsa-miR-128-3p | <a href="#">RIC3</a>      | RIC3 acetylcholine receptor chaperone                        |
| hsa-miR-128-3p | <a href="#">MTA3</a>      | metastasis associated 1 family member 3                      |
| hsa-miR-128-3p | <a href="#">PTPRQ</a>     | protein tyrosine phosphatase, receptor type Q                |
| hsa-miR-128-3p | <a href="#">PTAR1</a>     | protein prenyltransferase alpha subunit repeat containing 1  |
| hsa-miR-128-3p | <a href="#">GCNT2</a>     | glucosaminyl (N-acetyl) transferase 2 (I blood group)        |

|                |                           |                                                                              |
|----------------|---------------------------|------------------------------------------------------------------------------|
| hsa-miR-128-3p | <a href="#">DZIP1</a>     | DAZ interacting zinc finger protein 1                                        |
| hsa-miR-128-3p | <a href="#">ZNF84</a>     | zinc finger protein 84                                                       |
| hsa-miR-128-3p | <a href="#">DENND1B</a>   | DENN domain containing 1B                                                    |
| hsa-miR-128-3p | <a href="#">ATP6V1C1</a>  | ATPase H <sup>+</sup> transporting V1 subunit C1                             |
| hsa-miR-128-3p | <a href="#">KCTD4</a>     | potassium channel tetramerization domain containing 4                        |
| hsa-miR-128-3p | <a href="#">CCN4</a>      | cellular communication network factor 4                                      |
| hsa-miR-128-3p | <a href="#">SBF2</a>      | SET binding factor 2                                                         |
| hsa-miR-128-3p | <a href="#">SETD5</a>     | SET domain containing 5                                                      |
| hsa-miR-128-3p | <a href="#">TMEM132E</a>  | transmembrane protein 132E                                                   |
| hsa-miR-128-3p | <a href="#">FBRSL1</a>    | fibrosin like 1                                                              |
| hsa-miR-128-3p | <a href="#">CLCN3</a>     | chloride voltage-gated channel 3                                             |
| hsa-miR-128-3p | <a href="#">SLITRK1</a>   | SLIT and NTRK like family member 1                                           |
| hsa-miR-128-3p | <a href="#">ZNF737</a>    | zinc finger protein 737                                                      |
| hsa-miR-128-3p | <a href="#">CIPC</a>      | CLOCK interacting pacemaker                                                  |
| hsa-miR-128-3p | <a href="#">SRP72</a>     | signal recognition particle 72                                               |
| hsa-miR-128-3p | <a href="#">TBC1D22B</a>  | TBC1 domain family member 22B                                                |
| hsa-miR-128-3p | <a href="#">YPEL3</a>     | yippee like 3                                                                |
| hsa-miR-128-3p | <a href="#">MED13</a>     | mediator complex subunit 13                                                  |
| hsa-miR-128-3p | <a href="#">C17orf102</a> | chromosome 17 open reading frame 102                                         |
| hsa-miR-128-3p | <a href="#">IFFO2</a>     | intermediate filament family orphan 2                                        |
| hsa-miR-128-3p | <a href="#">ADGRG6</a>    | adhesion G protein-coupled receptor G6                                       |
| hsa-miR-128-3p | <a href="#">PITHD1</a>    | PITH domain containing 1                                                     |
| hsa-miR-128-3p | <a href="#">SLC6A17</a>   | solute carrier family 6 member 17                                            |
| hsa-miR-128-3p | <a href="#">RGS6</a>      | regulator of G protein signaling 6                                           |
| hsa-miR-128-3p | <a href="#">PCM1</a>      | pericentriolar material 1                                                    |
| hsa-miR-128-3p | <a href="#">WNK3</a>      | WNK lysine deficient protein kinase 3                                        |
| hsa-miR-128-3p | <a href="#">PFKL</a>      | phosphofructokinase, liver type                                              |
| hsa-miR-128-3p | <a href="#">MDFI</a>      | MyoD family inhibitor                                                        |
| hsa-miR-128-3p | <a href="#">RBPMS2</a>    | RNA binding protein, mRNA processing factor 2                                |
| hsa-miR-128-3p | <a href="#">EBI3</a>      | Epstein-Barr virus induced 3                                                 |
| hsa-miR-128-3p | <a href="#">NXF1</a>      | nuclear RNA export factor 1                                                  |
| hsa-miR-128-3p | <a href="#">WASHC4</a>    | WASH complex subunit 4                                                       |
| hsa-miR-128-3p | <a href="#">SEMA6A</a>    | semaphorin 6A                                                                |
| hsa-miR-128-3p | <a href="#">PHF20</a>     | PHD finger protein 20                                                        |
| hsa-miR-128-3p | <a href="#">ZHX1</a>      | zinc fingers and homeoboxes 1                                                |
| hsa-miR-128-3p | <a href="#">PLXNC1</a>    | plexin C1                                                                    |
| hsa-miR-128-3p | <a href="#">ABHD17B</a>   | abhydrolase domain containing 17B                                            |
| hsa-miR-128-3p | <a href="#">VAV3</a>      | vav guanine nucleotide exchange factor 3                                     |
| hsa-miR-128-3p | <a href="#">EDRF1</a>     | erythroid differentiation regulatory factor 1                                |
| hsa-miR-128-3p | <a href="#">TCEANC2</a>   | transcription elongation factor A N-terminal and central domain containing 2 |
| hsa-miR-128-3p | <a href="#">ZCCHC24</a>   | zinc finger CCHC-type containing 24                                          |
| hsa-miR-128-3p | <a href="#">STARD4</a>    | StAR related lipid transfer domain containing 4                              |
| hsa-miR-128-3p | <a href="#">EYA1</a>      | EYA transcriptional coactivator and phosphatase 1                            |
| hsa-miR-128-3p | <a href="#">PDE12</a>     | phosphodiesterase 12                                                         |

|                |                          |                                                        |
|----------------|--------------------------|--------------------------------------------------------|
| hsa-miR-128-3p | <a href="#">NR2F6</a>    | nuclear receptor subfamily 2 group F member 6          |
| hsa-miR-128-3p | <a href="#">SEMA6D</a>   | semaphorin 6D                                          |
| hsa-miR-128-3p | <a href="#">ARHGAP28</a> | Rho GTPase activating protein 28                       |
| hsa-miR-128-3p | <a href="#">MPL</a>      | MPL proto-oncogene, thrombopoietin receptor            |
| hsa-miR-128-3p | <a href="#">CDCP1</a>    | CUB domain containing protein 1                        |
| hsa-miR-128-3p | <a href="#">PIK3R1</a>   | phosphoinositide-3-kinase regulatory subunit 1         |
| hsa-miR-128-3p | <a href="#">TMEM266</a>  | transmembrane protein 266                              |
| hsa-miR-128-3p | <a href="#">FOXO1</a>    | forkhead box O1                                        |
| hsa-miR-128-3p | <a href="#">LRAT</a>     | lecithin retinol acyltransferase                       |
| hsa-miR-128-3p | <a href="#">OGFRL1</a>   | opioid growth factor receptor like 1                   |
| hsa-miR-128-3p | <a href="#">LMTK2</a>    | lemur tyrosine kinase 2                                |
| hsa-miR-128-3p | <a href="#">FAM172A</a>  | family with sequence similarity 172 member A           |
| hsa-miR-128-3p | <a href="#">NCBP3</a>    | nuclear cap binding subunit 3                          |
| hsa-miR-128-3p | <a href="#">ANK1</a>     | ankyrin 1                                              |
| hsa-miR-128-3p | <a href="#">CPEB3</a>    | cytoplasmic polyadenylation element binding protein 3  |
| hsa-miR-128-3p | <a href="#">TMBIM6</a>   | transmembrane BAX inhibitor motif containing 6         |
| hsa-miR-128-3p | <a href="#">RASL12</a>   | RAS like family 12                                     |
| hsa-miR-128-3p | <a href="#">CYLD</a>     | CYLD lysine 63 deubiquitinase                          |
| hsa-miR-128-3p | <a href="#">MOB1B</a>    | MOB kinase activator 1B                                |
| hsa-miR-128-3p | <a href="#">SYNDIG1</a>  | synapse differentiation inducing 1                     |
| hsa-miR-128-3p | <a href="#">RGS8</a>     | regulator of G protein signaling 8                     |
| hsa-miR-128-3p | <a href="#">AMMECR1L</a> | AMMECR1 like                                           |
| hsa-miR-128-3p | <a href="#">ATL3</a>     | atlastin GTPase 3                                      |
| hsa-miR-128-3p | <a href="#">CCR9</a>     | C-C motif chemokine receptor 9                         |
| hsa-miR-128-3p | <a href="#">EHF</a>      | ETS homologous factor                                  |
| hsa-miR-128-3p | <a href="#">LSM1</a>     | LSM1 homolog, mRNA degradation associated              |
| hsa-miR-128-3p | <a href="#">NPTX1</a>    | neuronal pentraxin 1                                   |
| hsa-miR-128-3p | <a href="#">YPEL2</a>    | yippee like 2                                          |
| hsa-miR-128-3p | <a href="#">IBSP</a>     | integrin binding sialoprotein                          |
| hsa-miR-128-3p | <a href="#">NTRK3</a>    | neurotrophic receptor tyrosine kinase 3                |
| hsa-miR-128-3p | <a href="#">TNRC18</a>   | trinucleotide repeat containing 18                     |
| hsa-miR-128-3p | <a href="#">CAPZA1</a>   | capping actin protein of muscle Z-line subunit alpha 1 |
| hsa-miR-128-3p | <a href="#">CBFB</a>     | core-binding factor subunit beta                       |
| hsa-miR-128-3p | <a href="#">DLGAP3</a>   | DLG associated protein 3                               |
| hsa-miR-128-3p | <a href="#">AGO3</a>     | argonaute RISC catalytic component 3                   |
| hsa-miR-128-3p | <a href="#">UBE2E3</a>   | ubiquitin conjugating enzyme E2 E3                     |
| hsa-miR-128-3p | <a href="#">PLEKHJ1</a>  | pleckstrin homology domain containing J1               |
| hsa-miR-128-3p | <a href="#">DUSP18</a>   | dual specificity phosphatase 18                        |
| hsa-miR-128-3p | <a href="#">CCT3</a>     | chaperonin containing TCP1 subunit 3                   |
| hsa-miR-128-3p | <a href="#">PFKFB4</a>   | 6-phosphofructo-2-kinase/fructose-2,6-biphosphatase 4  |
| hsa-miR-128-3p | <a href="#">SMURF2</a>   | SMAD specific E3 ubiquitin protein ligase 2            |
| hsa-miR-128-3p | <a href="#">DCAF7</a>    | DDB1 and CUL4 associated factor 7                      |
| hsa-miR-128-3p | <a href="#">SPTBN1</a>   | spectrin beta, non-erythrocytic 1                      |
| hsa-miR-128-3p | <a href="#">ACVR2A</a>   | activin A receptor type 2A                             |
| hsa-miR-128-3p | <a href="#">LIX1</a>     | limb and CNS expressed 1                               |

|                |                          |                                                                      |
|----------------|--------------------------|----------------------------------------------------------------------|
| hsa-miR-128-3p | <a href="#">GNG12</a>    | G protein subunit gamma 12                                           |
| hsa-miR-128-3p | <a href="#">LY6G5B</a>   | lymphocyte antigen 6 family member G5B                               |
| hsa-miR-128-3p | <a href="#">IKZF2</a>    | IKAROS family zinc finger 2                                          |
| hsa-miR-128-3p | <a href="#">SLU7</a>     | SLU7 homolog, splicing factor                                        |
| hsa-miR-128-3p | <a href="#">CNR1</a>     | cannabinoid receptor 1                                               |
| hsa-miR-128-3p | <a href="#">CPD</a>      | carboxypeptidase D                                                   |
| hsa-miR-128-3p | <a href="#">PDGFRA</a>   | platelet derived growth factor receptor alpha                        |
| hsa-miR-128-3p | <a href="#">TAB3</a>     | TGF-beta activated kinase 1 (MAP3K7) binding protein 3               |
| hsa-miR-128-3p | <a href="#">TRAF3</a>    | TNF receptor associated factor 3                                     |
| hsa-miR-128-3p | <a href="#">TFEB</a>     | transcription factor EB                                              |
| hsa-miR-128-3p | <a href="#">HEG1</a>     | heart development protein with EGF like domains 1                    |
| hsa-miR-128-3p | <a href="#">ADCY3</a>    | adenylate cyclase 3                                                  |
| hsa-miR-128-3p | <a href="#">GATAD2A</a>  | GATA zinc finger domain containing 2A                                |
| hsa-miR-128-3p | <a href="#">RBM4</a>     | RNA binding motif protein 4                                          |
| hsa-miR-128-3p | <a href="#">ELOVL6</a>   | ELOVL fatty acid elongase 6                                          |
| hsa-miR-128-3p | <a href="#">FUBP3</a>    | far upstream element binding protein 3                               |
| hsa-miR-128-3p | <a href="#">MIER3</a>    | MIER family member 3                                                 |
| hsa-miR-128-3p | <a href="#">PCTP</a>     | phosphatidylcholine transfer protein                                 |
| hsa-miR-128-3p | <a href="#">MAGI3</a>    | membrane associated guanylate kinase, WW and PDZ domain containing 3 |
| hsa-miR-128-3p | <a href="#">PTPN5</a>    | protein tyrosine phosphatase, non-receptor type 5                    |
| hsa-miR-128-3p | <a href="#">GOT2</a>     | glutamic-oxaloacetic transaminase 2                                  |
| hsa-miR-128-3p | <a href="#">HIPK2</a>    | homeodomain interacting protein kinase 2                             |
| hsa-miR-128-3p | <a href="#">UNC45B</a>   | unc-45 myosin chaperone B                                            |
| hsa-miR-128-3p | <a href="#">TMEM91</a>   | transmembrane protein 91                                             |
| hsa-miR-128-3p | <a href="#">INSR</a>     | insulin receptor                                                     |
| hsa-miR-128-3p | <a href="#">SFRP1</a>    | secreted frizzled related protein 1                                  |
| hsa-miR-128-3p | <a href="#">ZNF510</a>   | zinc finger protein 510                                              |
| hsa-miR-128-3p | <a href="#">HOXA9</a>    | homeobox A9                                                          |
| hsa-miR-128-3p | <a href="#">DCP2</a>     | decapping mRNA 2                                                     |
| hsa-miR-128-3p | <a href="#">SCAMP3</a>   | secretory carrier membrane protein 3                                 |
| hsa-miR-128-3p | <a href="#">C11orf87</a> | chromosome 11 open reading frame 87                                  |
| hsa-miR-128-3p | <a href="#">PLPP3</a>    | phospholipid phosphatase 3                                           |
| hsa-miR-128-3p | <a href="#">IPMK</a>     | inositol polyphosphate multikinase                                   |
| hsa-miR-128-3p | <a href="#">TM9SF2</a>   | transmembrane 9 superfamily member 2                                 |
| hsa-miR-128-3p | <a href="#">LGALS3</a>   | galectin 3                                                           |
| hsa-miR-128-3p | <a href="#">BAHD1</a>    | bromo adjacent homology domain containing 1                          |
| hsa-miR-128-3p | <a href="#">RIPOR2</a>   | RHO family interacting cell polarization regulator 2                 |
| hsa-miR-128-3p | <a href="#">NPAS3</a>    | neuronal PAS domain protein 3                                        |
| hsa-miR-128-3p | <a href="#">HOXA10</a>   | homeobox A10                                                         |
| hsa-miR-128-3p | <a href="#">TCAIM</a>    | T cell activation inhibitor, mitochondrial                           |
| hsa-miR-128-3p | <a href="#">PTPRI</a>    | protein tyrosine phosphatase, receptor type J                        |
| hsa-miR-128-3p | <a href="#">BEX3</a>     | brain expressed X-linked 3                                           |
| hsa-miR-128-3p | <a href="#">KMT2C</a>    | lysine methyltransferase 2C                                          |
| hsa-miR-128-3p | <a href="#">TLK2</a>     | tousled like kinase 2                                                |

|                |                          |                                                            |
|----------------|--------------------------|------------------------------------------------------------|
| hsa-miR-128-3p | <a href="#">RESF1</a>    | retroelement silencing factor 1                            |
| hsa-miR-128-3p | <a href="#">SEMA7A</a>   | semaphorin 7A (John Milton Hagen blood group)              |
| hsa-miR-128-3p | <a href="#">H2AFY</a>    | H2A histone family member Y                                |
| hsa-miR-128-3p | <a href="#">UNC5D</a>    | unc-5 netrin receptor D                                    |
| hsa-miR-128-3p | <a href="#">ZBTB39</a>   | zinc finger and BTB domain containing 39                   |
| hsa-miR-128-3p | <a href="#">GRIP1</a>    | glutamate receptor interacting protein 1                   |
| hsa-miR-128-3p | <a href="#">ZNF696</a>   | zinc finger protein 696                                    |
| hsa-miR-128-3p | <a href="#">NUDT6</a>    | nudix hydrolase 6                                          |
| hsa-miR-128-3p | <a href="#">GFPT2</a>    | glutamine-fructose-6-phosphate transaminase 2              |
| hsa-miR-128-3p | <a href="#">CCDC50</a>   | coiled-coil domain containing 50                           |
| hsa-miR-128-3p | <a href="#">PPIL4</a>    | peptidylprolyl isomerase like 4                            |
| hsa-miR-128-3p | <a href="#">PTPN4</a>    | protein tyrosine phosphatase, non-receptor type 4          |
| hsa-miR-128-3p | <a href="#">COL3A1</a>   | collagen type III alpha 1 chain                            |
| hsa-miR-128-3p | <a href="#">DCK</a>      | deoxycytidine kinase                                       |
| hsa-miR-128-3p | <a href="#">DDX6</a>     | DEAD-box helicase 6                                        |
| hsa-miR-128-3p | <a href="#">BMPR2</a>    | bone morphogenetic protein receptor type 2                 |
| hsa-miR-128-3p | <a href="#">CCDC71</a>   | coiled-coil domain containing 71                           |
| hsa-miR-128-3p | <a href="#">UNKL</a>     | unk like zinc finger                                       |
| hsa-miR-128-3p | <a href="#">CASC10</a>   | cancer susceptibility 10                                   |
| hsa-miR-128-3p | <a href="#">FBXO33</a>   | F-box protein 33                                           |
| hsa-miR-128-3p | <a href="#">PRKAG2</a>   | protein kinase AMP-activated non-catalytic subunit gamma 2 |
| hsa-miR-128-3p | <a href="#">COX6C</a>    | cytochrome c oxidase subunit 6C                            |
| hsa-miR-128-3p | <a href="#">ULK1</a>     | unc-51 like autophagy activating kinase 1                  |
| hsa-miR-128-3p | <a href="#">ABCB10</a>   | ATP binding cassette subfamily B member 10                 |
| hsa-miR-128-3p | <a href="#">TRIM32</a>   | tripartite motif containing 32                             |
| hsa-miR-128-3p | <a href="#">TPH2</a>     | tryptophan hydroxylase 2                                   |
| hsa-miR-128-3p | <a href="#">MAGEA10</a>  | MAGE family member A10                                     |
| hsa-miR-128-3p | <a href="#">USP15</a>    | ubiquitin specific peptidase 15                            |
| hsa-miR-128-3p | <a href="#">CDKN2A</a>   | cyclin dependent kinase inhibitor 2A                       |
| hsa-miR-128-3p | <a href="#">PTGER3</a>   | prostaglandin E receptor 3                                 |
| hsa-miR-128-3p | <a href="#">MEGF6</a>    | multiple EGF like domains 6                                |
| hsa-miR-128-3p | <a href="#">ADGRA3</a>   | adhesion G protein-coupled receptor A3                     |
| hsa-miR-128-3p | <a href="#">ACTA2</a>    | actin, alpha 2, smooth muscle, aorta                       |
| hsa-miR-128-3p | <a href="#">SLC25A25</a> | solute carrier family 25 member 25                         |
| hsa-miR-128-3p | <a href="#">ID2</a>      | inhibitor of DNA binding 2                                 |
| hsa-miR-128-3p | <a href="#">DEF8</a>     | differentially expressed in FDCP 8 homolog                 |
| hsa-miR-128-3p | <a href="#">FGD6</a>     | FYVE, RhoGEF and PH domain containing 6                    |
| hsa-miR-128-3p | <a href="#">LRRN4CL</a>  | LRRN4 C-terminal like                                      |
| hsa-miR-128-3p | <a href="#">ACTR8</a>    | ARP8 actin related protein 8 homolog                       |
| hsa-miR-128-3p | <a href="#">ARHGAP19</a> | Rho GTPase activating protein 19                           |
| hsa-miR-128-3p | <a href="#">RAB3B</a>    | RAB3B, member RAS oncogene family                          |
| hsa-miR-128-3p | <a href="#">NAA15</a>    | N(alpha)-acetyltransferase 15, NatA auxiliary subunit      |
| hsa-miR-128-3p | <a href="#">RAP2A</a>    | RAP2A, member of RAS oncogene family                       |
| hsa-miR-128-3p | <a href="#">STK40</a>    | serine/threonine kinase 40                                 |
| hsa-miR-128-3p | <a href="#">TMCC1</a>    | transmembrane and coiled-coil domain family 1              |



|                |                          |                                                             |
|----------------|--------------------------|-------------------------------------------------------------|
| hsa-miR-128-3p | <a href="#">RALGAPA2</a> | Ral GTPase activating protein catalytic alpha subunit 2     |
| hsa-miR-128-3p | <a href="#">ST13</a>     | ST13, Hsp70 interacting protein                             |
| hsa-miR-128-3p | <a href="#">ZBTB34</a>   | zinc finger and BTB domain containing 34                    |
| hsa-miR-128-3p | <a href="#">NHS</a>      | NHS actin remodeling regulator                              |
| hsa-miR-128-3p | <a href="#">NETO2</a>    | neuropilin and tolloid like 2                               |
| hsa-miR-128-3p | <a href="#">TRMT2A</a>   | tRNA methyltransferase 2 homolog A                          |
| hsa-miR-128-3p | <a href="#">PELI2</a>    | pellino E3 ubiquitin protein ligase family member 2         |
| hsa-miR-128-3p | <a href="#">UBE2K</a>    | ubiquitin conjugating enzyme E2 K                           |
| hsa-miR-128-3p | <a href="#">CDYL2</a>    | chromodomain Y like 2                                       |
| hsa-miR-128-3p | <a href="#">VSIG10</a>   | V-set and immunoglobulin domain containing 10               |
| hsa-miR-128-3p | <a href="#">FAM122B</a>  | family with sequence similarity 122B                        |
| hsa-miR-128-3p | <a href="#">PARK7</a>    | Parkinsonism associated deglycase                           |
| hsa-miR-128-3p | <a href="#">KPNA3</a>    | karyopherin subunit alpha 3                                 |
| hsa-miR-128-3p | <a href="#">CPA4</a>     | carboxypeptidase A4                                         |
| hsa-miR-128-3p | <a href="#">SBNO1</a>    | strawberry notch homolog 1                                  |
| hsa-miR-128-3p | <a href="#">SDF2</a>     | stromal cell derived factor 2                               |
| hsa-miR-128-3p | <a href="#">NOVA1</a>    | NOVA alternative splicing regulator 1                       |
| hsa-miR-128-3p | <a href="#">NIPAL4</a>   | NIPA like domain containing 4                               |
| hsa-miR-128-3p | <a href="#">CAB39</a>    | calcium binding protein 39                                  |
| hsa-miR-128-3p | <a href="#">CHKA</a>     | choline kinase alpha                                        |
| hsa-miR-128-3p | <a href="#">PLAGL1</a>   | PLAG1 like zinc finger 1                                    |
| hsa-miR-128-3p | <a href="#">PSPC1</a>    | paraspeckle component 1                                     |
| hsa-miR-128-3p | <a href="#">PROZ</a>     | protein Z, vitamin K dependent plasma glycoprotein          |
| hsa-miR-128-3p | <a href="#">GOLGA6C</a>  | golgin A6 family member C                                   |
| hsa-miR-128-3p | <a href="#">RUNDC3A</a>  | RUN domain containing 3A                                    |
| hsa-miR-128-3p | <a href="#">MDM4</a>     | MDM4, p53 regulator                                         |
| hsa-miR-128-3p | <a href="#">NRARP</a>    | NOTCH regulated ankyrin repeat protein                      |
| hsa-miR-128-3p | <a href="#">ORMDL3</a>   | ORMDL sphingolipid biosynthesis regulator 3                 |
| hsa-miR-128-3p | <a href="#">TM4SF20</a>  | transmembrane 4 L six family member 20                      |
| hsa-miR-128-3p | <a href="#">ANKS1A</a>   | ankyrin repeat and sterile alpha motif domain containing 1A |
| hsa-miR-128-3p | <a href="#">TMX1</a>     | thioredoxin related transmembrane protein 1                 |
| hsa-miR-128-3p | <a href="#">TYW1</a>     | tRNA-yW synthesizing protein 1 homolog                      |
| hsa-miR-128-3p | <a href="#">USP25</a>    | ubiquitin specific peptidase 25                             |
| hsa-miR-128-3p | <a href="#">TMEM170A</a> | transmembrane protein 170A                                  |
| hsa-miR-128-3p | <a href="#">IKZF1</a>    | IKAROS family zinc finger 1                                 |
| hsa-miR-128-3p | <a href="#">DOCK11</a>   | dedicator of cytokinesis 11                                 |
| hsa-miR-128-3p | <a href="#">DNAJC13</a>  | DnaJ heat shock protein family (Hsp40) member C13           |
| hsa-miR-128-3p | <a href="#">LPGAT1</a>   | lysophosphatidylglycerol acyltransferase 1                  |
| hsa-miR-128-3p | <a href="#">ZEB1</a>     | zinc finger E-box binding homeobox 1                        |
| hsa-miR-128-3p | <a href="#">ZNF569</a>   | zinc finger protein 569                                     |
| hsa-miR-128-3p | <a href="#">NKX3-2</a>   | NK3 homeobox 2                                              |
| hsa-miR-128-3p | <a href="#">DVL2</a>     | dishevelled segment polarity protein 2                      |
| hsa-miR-128-3p | <a href="#">NDUFS4</a>   | NADH:ubiquinone oxidoreductase subunit S4                   |
| hsa-miR-128-3p | <a href="#">KCNA4</a>    | potassium voltage-gated channel subfamily A member 4        |
| hsa-miR-128-3p | <a href="#">CBFA2T3</a>  | CBFA2/RUNX1 translocation partner 3                         |

|                |                           |                                                                                |
|----------------|---------------------------|--------------------------------------------------------------------------------|
| hsa-miR-128-3p | <a href="#">NTNG1</a>     | netrin G1                                                                      |
| hsa-miR-128-3p | <a href="#">TTC28</a>     | tetratricopeptide repeat domain 28                                             |
| hsa-miR-128-3p | <a href="#">GATA2</a>     | GATA binding protein 2                                                         |
| hsa-miR-128-3p | <a href="#">BRSK2</a>     | BR serine/threonine kinase 2                                                   |
| hsa-miR-128-3p | <a href="#">DMTF1</a>     | cyclin D binding myb like transcription factor 1                               |
| hsa-miR-128-3p | <a href="#">FN1</a>       | fibronectin 1                                                                  |
| hsa-miR-128-3p | <a href="#">CLP1</a>      | cleavage and polyadenylation factor I subunit 1                                |
| hsa-miR-128-3p | <a href="#">KMT5A</a>     | lysine methyltransferase 5A                                                    |
| hsa-miR-128-3p | <a href="#">EIF5</a>      | eukaryotic translation initiation factor 5                                     |
| hsa-miR-128-3p | <a href="#">INPP5J</a>    | inositol polyphosphate-5-phosphatase J                                         |
| hsa-miR-128-3p | <a href="#">PIAS2</a>     | protein inhibitor of activated STAT 2                                          |
| hsa-miR-128-3p | <a href="#">INPP1</a>     | inositol polyphosphate-1-phosphatase                                           |
| hsa-miR-128-3p | <a href="#">POU2F1</a>    | POU class 2 homeobox 1                                                         |
| hsa-miR-128-3p | <a href="#">NEK6</a>      | NIMA related kinase 6                                                          |
| hsa-miR-128-3p | <a href="#">TBC1D9B</a>   | TBC1 domain family member 9B                                                   |
| hsa-miR-128-3p | <a href="#">JCHAIN</a>    | joining chain of multimeric IgA and IgM                                        |
| hsa-miR-128-3p | <a href="#">ARFGEF1</a>   | ADP ribosylation factor guanine nucleotide exchange factor 1                   |
| hsa-miR-128-3p | <a href="#">FAM102B</a>   | family with sequence similarity 102 member B                                   |
| hsa-miR-128-3p | <a href="#">CDH6</a>      | cadherin 6                                                                     |
| hsa-miR-128-3p | <a href="#">SUZ12</a>     | SUZ12, polycomb repressive complex 2 subunit                                   |
| hsa-miR-128-3p | <a href="#">KCNJ3</a>     | potassium voltage-gated channel subfamily J member 3                           |
| hsa-miR-128-3p | <a href="#">SHISA6</a>    | shisa family member 6                                                          |
| hsa-miR-128-3p | <a href="#">ALG9</a>      | ALG9, alpha-1,2-mannosyltransferase                                            |
| hsa-miR-128-3p | <a href="#">TENT4A</a>    | terminal nucleotidyltransferase 4A                                             |
| hsa-miR-128-3p | <a href="#">PRDM16</a>    | PR/SET domain 16                                                               |
| hsa-miR-128-3p | <a href="#">ETV3L</a>     | ETS variant 3 like                                                             |
| hsa-miR-128-3p | <a href="#">HAND2</a>     | heart and neural crest derivatives expressed 2                                 |
| hsa-miR-128-3p | <a href="#">LRRFIP1</a>   | LRR binding FLII interacting protein 1                                         |
| hsa-miR-128-3p | <a href="#">UNC5C</a>     | unc-5 netrin receptor C                                                        |
| hsa-miR-128-3p | <a href="#">DMKN</a>      | dermokine                                                                      |
| hsa-miR-128-3p | <a href="#">ADH7</a>      | alcohol dehydrogenase 7 (class IV), mu or sigma polypeptide                    |
| hsa-miR-128-3p | <a href="#">SPATA2</a>    | spermatogenesis associated 2                                                   |
| hsa-miR-128-3p | <a href="#">ATOH8</a>     | atonal bHLH transcription factor 8                                             |
| hsa-miR-128-3p | <a href="#">ARL8B</a>     | ADP ribosylation factor like GTPase 8B                                         |
| hsa-miR-128-3p | <a href="#">SHE</a>       | Src homology 2 domain containing E                                             |
| hsa-miR-128-3p | <a href="#">YTHDC1</a>    | YTH domain containing 1                                                        |
| hsa-miR-128-3p | <a href="#">OGA</a>       | O-GlcNAcase                                                                    |
| hsa-miR-128-3p | <a href="#">ORC5</a>      | origin recognition complex subunit 5                                           |
| hsa-miR-128-3p | <a href="#">ELFN2</a>     | extracellular leucine rich repeat and fibronectin type III domain containing 2 |
| hsa-miR-128-3p | <a href="#">PKIA</a>      | cAMP-dependent protein kinase inhibitor alpha                                  |
| hsa-miR-128-3p | <a href="#">LIN7C</a>     | lin-7 homolog C, crumbs cell polarity complex component                        |
| hsa-miR-128-3p | <a href="#">KIAA1549L</a> | KIAA1549 like                                                                  |
| hsa-miR-128-3p | <a href="#">ILDR2</a>     | immunoglobulin like domain containing receptor 2                               |
| hsa-miR-128-3p | <a href="#">SESN2</a>     | sestrin 2                                                                      |

|                |                              |                                                                |
|----------------|------------------------------|----------------------------------------------------------------|
| hsa-miR-128-3p | <a href="#">TDRP</a>         | testis development related protein                             |
| hsa-miR-128-3p | <a href="#">NECTIN3</a>      | nectin cell adhesion molecule 3                                |
| hsa-miR-128-3p | <a href="#">S100A7A</a>      | S100 calcium binding protein A7A                               |
| hsa-miR-128-3p | <a href="#">TCIM</a>         | transcriptional and immune response regulator                  |
| hsa-miR-128-3p | <a href="#">DCAF17</a>       | DDB1 and CUL4 associated factor 17                             |
| hsa-miR-128-3p | <a href="#">UHRF2</a>        | ubiquitin like with PHD and ring finger domains 2              |
| hsa-miR-128-3p | <a href="#">FOXN3</a>        | forkhead box N3                                                |
| hsa-miR-128-3p | <a href="#">TAF4</a>         | TATA-box binding protein associated factor 4                   |
| hsa-miR-128-3p | <a href="#">SSX2B</a>        | SSX family member 2B                                           |
| hsa-miR-128-3p | <a href="#">NEMP1</a>        | nuclear envelope integral membrane protein 1                   |
| hsa-miR-128-3p | <a href="#">DDHD1</a>        | DDHD domain containing 1                                       |
| hsa-miR-128-3p | <a href="#">PDE3B</a>        | phosphodiesterase 3B                                           |
| hsa-miR-128-3p | <a href="#">RMND5A</a>       | required for meiotic nuclear division 5 homolog A              |
| hsa-miR-128-3p | <a href="#">CRB2</a>         | crumbs cell polarity complex component 2                       |
| hsa-miR-128-3p | <a href="#">TMEM229A</a>     | transmembrane protein 229A                                     |
| hsa-miR-128-3p | <a href="#">TRIM6-TRIM34</a> | TRIM6-TRIM34 readthrough                                       |
| hsa-miR-128-3p | <a href="#">PNISR</a>        | PNN interacting serine and arginine rich protein               |
| hsa-miR-128-3p | <a href="#">MAST4</a>        | microtubule associated serine/threonine kinase family member 4 |
| hsa-miR-128-3p | <a href="#">TRIM34</a>       | tripartite motif containing 34                                 |
| hsa-miR-128-3p | <a href="#">SREBF2</a>       | sterol regulatory element binding transcription factor 2       |
| hsa-miR-128-3p | <a href="#">NLRP2B</a>       | NLR family pyrin domain containing 2B                          |
| hsa-miR-128-3p | <a href="#">RXRA</a>         | retinoid X receptor alpha                                      |
| hsa-miR-128-3p | <a href="#">LIN28B</a>       | lin-28 homolog B                                               |
| hsa-miR-128-3p | <a href="#">TPM1</a>         | tropomyosin 1                                                  |
| hsa-miR-128-3p | <a href="#">ERG</a>          | ETS transcription factor ERG                                   |
| hsa-miR-128-3p | <a href="#">CPLX3</a>        | complexin 3                                                    |
| hsa-miR-128-3p | <a href="#">DKK2</a>         | dickkopf WNT signaling pathway inhibitor 2                     |
| hsa-miR-128-3p | <a href="#">SSX2</a>         | SSX family member 2                                            |
| hsa-miR-128-3p | <a href="#">FAM206A</a>      | family with sequence similarity 206 member A                   |
| hsa-miR-128-3p | <a href="#">ZNF792</a>       | zinc finger protein 792                                        |
| hsa-miR-128-3p | <a href="#">PLAG1</a>        | PLAG1 zinc finger                                              |
| hsa-miR-128-3p | <a href="#">C1orf52</a>      | chromosome 1 open reading frame 52                             |
| hsa-miR-128-3p | <a href="#">TBC1D1</a>       | TBC1 domain family member 1                                    |
| hsa-miR-128-3p | <a href="#">KIAA1211L</a>    | KIAA1211 like                                                  |
| hsa-miR-128-3p | <a href="#">ADAMTS10</a>     | ADAM metalloproteinase with thrombospondin type 1 motif 10     |
| hsa-miR-128-3p | <a href="#">TMUB1</a>        | transmembrane and ubiquitin like domain containing 1           |
| hsa-miR-128-3p | <a href="#">ARHGEF26</a>     | Rho guanine nucleotide exchange factor 26                      |
| hsa-miR-128-3p | <a href="#">HBEGF</a>        | heparin binding EGF like growth factor                         |
| hsa-miR-128-3p | <a href="#">RASAL2</a>       | RAS protein activator like 2                                   |
| hsa-miR-128-3p | <a href="#">IL12RB2</a>      | interleukin 12 receptor subunit beta 2                         |
| hsa-miR-128-3p | <a href="#">CRTCL</a>        | CREB regulated transcription coactivator 1                     |
| hsa-miR-128-3p | <a href="#">RFX3</a>         | regulatory factor X3                                           |
| hsa-miR-128-3p | <a href="#">ELAVL2</a>       | ELAV like RNA binding protein 2                                |
| hsa-miR-128-3p | <a href="#">AIF1L</a>        | allograft inflammatory factor 1 like                           |
| hsa-miR-128-3p | <a href="#">BET1L</a>        | Bet1 golgi vesicular membrane trafficking protein like         |

|                |                          |                                                                                 |
|----------------|--------------------------|---------------------------------------------------------------------------------|
| hsa-miR-128-3p | <a href="#">ALDH5A1</a>  | aldehyde dehydrogenase 5 family member A1                                       |
| hsa-miR-128-3p | <a href="#">WDFY1</a>    | WD repeat and FYVE domain containing 1                                          |
| hsa-miR-128-3p | <a href="#">SAR1A</a>    | secretion associated Ras related GTPase 1A                                      |
| hsa-miR-128-3p | <a href="#">TRIO</a>     | trio Rho guanine nucleotide exchange factor                                     |
| hsa-miR-128-3p | <a href="#">TBX3</a>     | T-box 3                                                                         |
| hsa-miR-128-3p | <a href="#">WIPF2</a>    | WAS/WASL interacting protein family member 2                                    |
| hsa-miR-128-3p | <a href="#">MS4A2</a>    | membrane spanning 4-domains A2                                                  |
| hsa-miR-128-3p | <a href="#">CCDC85C</a>  | coiled-coil domain containing 85C                                               |
| hsa-miR-128-3p | <a href="#">RBM33</a>    | RNA binding motif protein 33                                                    |
| hsa-miR-128-3p | <a href="#">MTMR10</a>   | myotubularin related protein 10                                                 |
| hsa-miR-128-3p | <a href="#">POM121</a>   | POM121 transmembrane nucleoporin                                                |
| hsa-miR-128-3p | <a href="#">PDK1</a>     | pyruvate dehydrogenase kinase 1                                                 |
| hsa-miR-128-3p | <a href="#">GALNT13</a>  | polypeptide N-acetylgalactosaminyltransferase 13                                |
| hsa-miR-128-3p | <a href="#">ZFP36L2</a>  | ZFP36 ring finger protein like 2                                                |
| hsa-miR-128-3p | <a href="#">KIAA1210</a> | KIAA1210                                                                        |
| hsa-miR-128-3p | <a href="#">RREB1</a>    | ras responsive element binding protein 1                                        |
| hsa-miR-128-3p | <a href="#">ELL2</a>     | elongation factor for RNA polymerase II 2                                       |
| hsa-miR-128-3p | <a href="#">TMCC3</a>    | transmembrane and coiled-coil domain family 3                                   |
| hsa-miR-128-3p | <a href="#">ZNF385A</a>  | zinc finger protein 385A                                                        |
| hsa-miR-128-3p | <a href="#">YY1AP1</a>   | YY1 associated protein 1                                                        |
| hsa-miR-128-3p | <a href="#">KCNAB2</a>   | potassium voltage-gated channel subfamily A regulatory beta subunit 2           |
| hsa-miR-128-3p | <a href="#">FAM13B</a>   | family with sequence similarity 13 member B                                     |
| hsa-miR-128-3p | <a href="#">GNG2</a>     | G protein subunit gamma 2                                                       |
| hsa-miR-128-3p | <a href="#">PBXIP1</a>   | PBX homeobox interacting protein 1                                              |
| hsa-miR-128-3p | <a href="#">SPOUT1</a>   | SPOUT domain containing methyltransferase 1                                     |
| hsa-miR-128-3p | <a href="#">NR5A2</a>    | nuclear receptor subfamily 5 group A member 2                                   |
| hsa-miR-128-3p | <a href="#">TBC1D8B</a>  | TBC1 domain family member 8B                                                    |
| hsa-miR-128-3p | <a href="#">PLXND1</a>   | plexin D1                                                                       |
| hsa-miR-128-3p | <a href="#">RAB3IP</a>   | RAB3A interacting protein                                                       |
| hsa-miR-128-3p | <a href="#">PPIF</a>     | peptidylprolyl isomerase F                                                      |
| hsa-miR-128-3p | <a href="#">CITED2</a>   | Cbp/p300 interacting transactivator with Glu/Asp rich carboxy-terminal domain 2 |
| hsa-miR-128-3p | <a href="#">IMJ1C</a>    | jumonji domain containing 1C                                                    |
| hsa-miR-128-3p | <a href="#">E2F6</a>     | E2F transcription factor 6                                                      |
| hsa-miR-128-3p | <a href="#">PDE8B</a>    | phosphodiesterase 8B                                                            |
| hsa-miR-128-3p | <a href="#">FRS3</a>     | fibroblast growth factor receptor substrate 3                                   |
| hsa-miR-128-3p | <a href="#">GRK6</a>     | G protein-coupled receptor kinase 6                                             |
| hsa-miR-128-3p | <a href="#">COL11A2</a>  | collagen type XI alpha 2 chain                                                  |
| hsa-miR-128-3p | <a href="#">CLCN5</a>    | chloride voltage-gated channel 5                                                |
| hsa-miR-128-3p | <a href="#">TMED5</a>    | transmembrane p24 trafficking protein 5                                         |
| hsa-miR-128-3p | <a href="#">MYBL1</a>    | MYB proto-oncogene like 1                                                       |
| hsa-miR-128-3p | <a href="#">KPNB1</a>    | karyopherin subunit beta 1                                                      |
| hsa-miR-128-3p | <a href="#">FANCA</a>    | FA complementation group A                                                      |
| hsa-miR-128-3p | <a href="#">LRRC57</a>   | leucine rich repeat containing 57                                               |
| hsa-miR-128-3p | <a href="#">DPH6</a>     | diphthamine biosynthesis 6                                                      |

|                |                         |                                                              |
|----------------|-------------------------|--------------------------------------------------------------|
| hsa-miR-128-3p | <a href="#">USP51</a>   | ubiquitin specific peptidase 51                              |
| hsa-miR-128-3p | <a href="#">LDLRAD3</a> | low density lipoprotein receptor class A domain containing 3 |
| hsa-miR-128-3p | <a href="#">NOD1</a>    | nucleotide binding oligomerization domain containing 1       |
| hsa-miR-128-3p | <a href="#">CRB1</a>    | crumbs cell polarity complex component 1                     |
| hsa-miR-128-3p | <a href="#">SS18L1</a>  | SS18L1, nBAF chromatin remodeling complex subunit            |
| hsa-miR-128-3p | <a href="#">GOLGA8A</a> | golgin A8 family member A                                    |
| hsa-miR-128-3p | <a href="#">FURIN</a>   | furin, paired basic amino acid cleaving enzyme               |
| hsa-miR-128-3p | <a href="#">ZNF140</a>  | zinc finger protein 140                                      |
| hsa-miR-128-3p | <a href="#">ZNF329</a>  | zinc finger protein 329                                      |
| hsa-miR-128-3p | <a href="#">STK39</a>   | serine/threonine kinase 39                                   |
| hsa-miR-128-3p | <a href="#">NOL4</a>    | nucleolar protein 4                                          |
| hsa-miR-128-3p | <a href="#">ZNF577</a>  | zinc finger protein 577                                      |
| hsa-miR-128-3p | <a href="#">ZNF426</a>  | zinc finger protein 426                                      |
| hsa-miR-128-3p | <a href="#">POM121C</a> | POM121 transmembrane nucleoporin C                           |
| hsa-miR-128-3p | <a href="#">TMEM87B</a> | transmembrane protein 87B                                    |
| hsa-miR-128-3p | <a href="#">STAB2</a>   | stabilin 2                                                   |
| hsa-miR-128-3p | <a href="#">MCTS1</a>   | MCTS1, re-initiation and release factor                      |
| hsa-miR-128-3p | <a href="#">KITLG</a>   | KIT ligand                                                   |
| hsa-miR-128-3p | <a href="#">EBF4</a>    | EBF family member 4                                          |
| hsa-miR-128-3p | <a href="#">MVB12B</a>  | multivesicular body subunit 12B                              |
| hsa-miR-128-3p | <a href="#">DLL4</a>    | delta like canonical Notch ligand 4                          |
| hsa-miR-128-3p | <a href="#">SLC5A9</a>  | solute carrier family 5 member 9                             |
| hsa-miR-128-3p | <a href="#">EPB41</a>   | erythrocyte membrane protein band 4.1                        |
| hsa-miR-128-3p | <a href="#">FAM222B</a> | family with sequence similarity 222 member B                 |
| hsa-miR-128-3p | <a href="#">ADCY6</a>   | adenylate cyclase 6                                          |
| hsa-miR-128-3p | <a href="#">USF3</a>    | upstream transcription factor family member 3                |
| hsa-miR-128-3p | <a href="#">CDK18</a>   | cyclin dependent kinase 18                                   |
| hsa-miR-128-3p | <a href="#">CREBRF</a>  | CREB3 regulatory factor                                      |
| hsa-miR-128-3p | <a href="#">BLOC1S5</a> | biogenesis of lysosomal organelles complex 1 subunit 5       |
| hsa-miR-128-3p | <a href="#">TIAL1</a>   | TIA1 cytotoxic granule associated RNA binding protein like 1 |
| hsa-miR-128-3p | <a href="#">FOXO4</a>   | forkhead box O4                                              |
| hsa-miR-128-3p | <a href="#">IGF2BP3</a> | insulin like growth factor 2 mRNA binding protein 3          |
| hsa-miR-128-3p | <a href="#">PRKCB</a>   | protein kinase C beta                                        |
| hsa-miR-128-3p | <a href="#">PGM2L1</a>  | phosphoglucomutase 2 like 1                                  |
| hsa-miR-128-3p | <a href="#">TSC1</a>    | TSC complex subunit 1                                        |
| hsa-miR-128-3p | <a href="#">ZNF286A</a> | zinc finger protein 286A                                     |
| hsa-miR-128-3p | <a href="#">ITSN2</a>   | intersectin 2                                                |
| hsa-miR-128-3p | <a href="#">FOXP4</a>   | forkhead box P4                                              |
| hsa-miR-128-3p | <a href="#">PSMA1</a>   | proteasome subunit alpha 1                                   |
| hsa-miR-128-3p | <a href="#">GOLGA6A</a> | golgin A6 family member A                                    |
| hsa-miR-128-3p | <a href="#">CADM1</a>   | cell adhesion molecule 1                                     |
| hsa-miR-128-3p | <a href="#">COX18</a>   | cytochrome c oxidase assembly factor COX18                   |
| hsa-miR-128-3p | <a href="#">ZNF500</a>  | zinc finger protein 500                                      |
| hsa-miR-128-3p | <a href="#">COX8A</a>   | cytochrome c oxidase subunit 8A                              |
| hsa-miR-128-3p | <a href="#">GOLGA6B</a> | golgin A6 family member B                                    |

|                |                          |                                                   |
|----------------|--------------------------|---------------------------------------------------|
| hsa-miR-128-3p | <a href="#">ZNF860</a>   | zinc finger protein 860                           |
| hsa-miR-128-3p | <a href="#">GOLGA6D</a>  | golgin A6 family member D                         |
| hsa-miR-128-3p | <a href="#">BAX</a>      | BCL2 associated X, apoptosis regulator            |
| hsa-miR-128-3p | <a href="#">NUP210</a>   | nucleoporin 210                                   |
| hsa-miR-128-3p | <a href="#">PROCR</a>    | protein C receptor                                |
| hsa-miR-128-3p | <a href="#">CISD2</a>    | CDGSH iron sulfur domain 2                        |
| hsa-miR-128-3p | <a href="#">NAB1</a>     | NGFI-A binding protein 1                          |
| hsa-miR-128-3p | <a href="#">ANKDD1A</a>  | ankyrin repeat and death domain containing 1A     |
| hsa-miR-128-3p | <a href="#">LSM12</a>    | LSM12 homolog                                     |
| hsa-miR-128-3p | <a href="#">GPATCH11</a> | G-patch domain containing 11                      |
| hsa-miR-128-3p | <a href="#">ADGRF2</a>   | adhesion G protein-coupled receptor F2            |
| hsa-miR-128-3p | <a href="#">GRAMD1B</a>  | GRAM domain containing 1B                         |
| hsa-miR-128-3p | <a href="#">INSM1</a>    | INSM transcriptional repressor 1                  |
| hsa-miR-128-3p | <a href="#">SGPP1</a>    | sphingosine-1-phosphate phosphatase 1             |
| hsa-miR-128-3p | <a href="#">GOLM1</a>    | golgi membrane protein 1                          |
| hsa-miR-128-3p | <a href="#">SHANK3</a>   | SH3 and multiple ankyrin repeat domains 3         |
| hsa-miR-128-3p | <a href="#">ZBED6CL</a>  | ZBED6 C-terminal like                             |
| hsa-miR-128-3p | <a href="#">NCOA1</a>    | nuclear receptor coactivator 1                    |
| hsa-miR-128-3p | <a href="#">ARMC3</a>    | armadillo repeat containing 3                     |
| hsa-miR-128-3p | <a href="#">IGFBPL1</a>  | insulin like growth factor binding protein like 1 |
| hsa-miR-128-3p | <a href="#">SATB2</a>    | SATB homeobox 2                                   |
| hsa-miR-128-3p | <a href="#">PLEKHM1</a>  | pleckstrin homology and RUN domain containing M1  |
| hsa-miR-128-3p | <a href="#">E2F3</a>     | E2F transcription factor 3                        |
| hsa-miR-128-3p | <a href="#">RAB3C</a>    | RAB3C, member RAS oncogene family                 |
| hsa-miR-128-3p | <a href="#">CABP1</a>    | calcium binding protein 1                         |
| hsa-miR-128-3p | <a href="#">HYOU1</a>    | hypoxia up-regulated 1                            |
| hsa-miR-128-3p | <a href="#">BMP3</a>     | bone morphogenetic protein 3                      |
| hsa-miR-128-3p | <a href="#">FUT9</a>     | fucosyltransferase 9                              |
| hsa-miR-128-3p | <a href="#">FAM120C</a>  | family with sequence similarity 120C              |
| hsa-miR-128-3p | <a href="#">RUVBL2</a>   | RuvB like AAA ATPase 2                            |
| hsa-miR-128-3p | <a href="#">EN1</a>      | engrailed homeobox 1                              |
| hsa-miR-128-3p | <a href="#">DNAJC3</a>   | DnaJ heat shock protein family (Hsp40) member C3  |
| hsa-miR-128-3p | <a href="#">PLPPR5</a>   | phospholipid phosphatase related 5                |
| hsa-miR-128-3p | <a href="#">SLC49A4</a>  | solute carrier family 49 member 4                 |
| hsa-miR-128-3p | <a href="#">ZNF37A</a>   | zinc finger protein 37A                           |
| hsa-miR-128-3p | <a href="#">OSER1</a>    | oxidative stress responsive serine rich 1         |
| hsa-miR-128-3p | <a href="#">FBLN1</a>    | fibulin 1                                         |
| hsa-miR-128-3p | <a href="#">MAP3K19</a>  | mitogen-activated protein kinase kinase kinase 19 |
| hsa-miR-128-3p | <a href="#">RNF139</a>   | ring finger protein 139                           |
| hsa-miR-128-3p | <a href="#">IQSEC1</a>   | IQ motif and Sec7 domain 1                        |
| hsa-miR-128-3p | <a href="#">MYOCD</a>    | myocardin                                         |
| hsa-miR-128-3p | <a href="#">DAP3</a>     | death associated protein 3                        |
| hsa-miR-128-3p | <a href="#">PPP1R3B</a>  | protein phosphatase 1 regulatory subunit 3B       |
| hsa-miR-128-3p | <a href="#">BEAN1</a>    | brain expressed associated with NEDD4 1           |
| hsa-miR-128-3p | <a href="#">PDXK</a>     | pyridoxal kinase                                  |



|                |                          |                                                                            |
|----------------|--------------------------|----------------------------------------------------------------------------|
| hsa-miR-128-3p | <a href="#">ZNF34</a>    | zinc finger protein 34                                                     |
| hsa-miR-128-3p | <a href="#">ALDH1L2</a>  | aldehyde dehydrogenase 1 family member L2                                  |
| hsa-miR-128-3p | <a href="#">LPCAT1</a>   | lysophosphatidylcholine acyltransferase 1                                  |
| hsa-miR-128-3p | <a href="#">KIAA1191</a> | KIAA1191                                                                   |
| hsa-miR-128-3p | <a href="#">NKAIN1</a>   | sodium/potassium transporting ATPase interacting 1                         |
| hsa-miR-128-3p | <a href="#">SYT4</a>     | synaptotagmin 4                                                            |
| hsa-miR-128-3p | <a href="#">TTC3</a>     | tetratricopeptide repeat domain 3                                          |
| hsa-miR-128-3p | <a href="#">MICAL3</a>   | microtubule associated monooxygenase, calponin and LIM domain containing 3 |
| hsa-miR-128-3p | <a href="#">C14orf93</a> | chromosome 14 open reading frame 93                                        |
| hsa-miR-128-3p | <a href="#">GNA13</a>    | G protein subunit alpha 13                                                 |
| hsa-miR-128-3p | <a href="#">C1orf229</a> | chromosome 1 open reading frame 229                                        |
| hsa-miR-128-3p | <a href="#">OTX2</a>     | orthodenticle homeobox 2                                                   |
| hsa-miR-128-3p | <a href="#">SMAD5</a>    | SMAD family member 5                                                       |
| hsa-miR-128-3p | <a href="#">LAPTM4B</a>  | lysosomal protein transmembrane 4 beta                                     |
| hsa-miR-128-3p | <a href="#">GPATCH2</a>  | G-patch domain containing 2                                                |
| hsa-miR-128-3p | <a href="#">G6PC2</a>    | glucose-6-phosphatase catalytic subunit 2                                  |
| hsa-miR-128-3p | <a href="#">FAM84B</a>   | family with sequence similarity 84 member B                                |
| hsa-miR-128-3p | <a href="#">G0S2</a>     | G0/G1 switch 2                                                             |
| hsa-miR-128-3p | <a href="#">CCNJ</a>     | cyclin J                                                                   |
| hsa-miR-128-3p | <a href="#">IADE2</a>    | jade family PHD finger 2                                                   |
| hsa-miR-128-3p | <a href="#">NOL9</a>     | nucleolar protein 9                                                        |
| hsa-miR-128-3p | <a href="#">ZIC5</a>     | Zic family member 5                                                        |
| hsa-miR-128-3p | <a href="#">GATC</a>     | glutamyl-tRNA amidotransferase subunit C                                   |
| hsa-miR-128-3p | <a href="#">NEURL1B</a>  | neuralized E3 ubiquitin protein ligase 1B                                  |
| hsa-miR-128-3p | <a href="#">TMEM9B</a>   | TMEM9 domain family member B                                               |
| hsa-miR-128-3p | <a href="#">CREB3L2</a>  | cAMP responsive element binding protein 3 like 2                           |
| hsa-miR-128-3p | <a href="#">HMGB3</a>    | high mobility group box 3                                                  |
| hsa-miR-128-3p | <a href="#">LONRF1</a>   | LON peptidase N-terminal domain and ring finger 1                          |
| hsa-miR-128-3p | <a href="#">GPR161</a>   | G protein-coupled receptor 161                                             |
| hsa-miR-128-3p | <a href="#">BTBD3</a>    | BTB domain containing 3                                                    |
| hsa-miR-128-3p | <a href="#">RELT</a>     | RELT, TNF receptor                                                         |
| hsa-miR-128-3p | <a href="#">SNIP1</a>    | Smad nuclear interacting protein 1                                         |
| hsa-miR-128-3p | <a href="#">NMB</a>      | neuromedin B                                                               |
| hsa-miR-128-3p | <a href="#">ASAH1</a>    | N-acylsphingosine amidohydrolase 1                                         |
| hsa-miR-128-3p | <a href="#">PRICKLE2</a> | prickle planar cell polarity protein 2                                     |
| hsa-miR-128-3p | <a href="#">FAM133B</a>  | family with sequence similarity 133 member B                               |
| hsa-miR-128-3p | <a href="#">APPBP2</a>   | amyloid beta precursor protein binding protein 2                           |
| hsa-miR-128-3p | <a href="#">ZNF470</a>   | zinc finger protein 470                                                    |
| hsa-miR-128-3p | <a href="#">TM2D3</a>    | TM2 domain containing 3                                                    |
| hsa-miR-128-3p | <a href="#">UBE2F</a>    | ubiquitin conjugating enzyme E2 F (putative)                               |
| hsa-miR-128-3p | <a href="#">SLFN13</a>   | schlafen family member 13                                                  |
| hsa-miR-128-3p | <a href="#">RGPD6</a>    | RANBP2-like and GRIP domain containing 6                                   |
| hsa-miR-128-3p | <a href="#">RNASEH2C</a> | ribonuclease H2 subunit C                                                  |
| hsa-miR-128-3p | <a href="#">GOLGA6L4</a> | golgin A6 family-like 4                                                    |

|                |                           |                                                                           |
|----------------|---------------------------|---------------------------------------------------------------------------|
| hsa-miR-128-3p | <a href="#">ARID2</a>     | AT-rich interaction domain 2                                              |
| hsa-miR-128-3p | <a href="#">FADD</a>      | Fas associated via death domain                                           |
| hsa-miR-128-3p | <a href="#">GOLGA6L10</a> | golgin A6 family-like 10                                                  |
| hsa-miR-128-3p | <a href="#">SUSD1</a>     | sushi domain containing 1                                                 |
| hsa-miR-128-3p | <a href="#">TRAPPC8</a>   | trafficking protein particle complex 8                                    |
| hsa-miR-128-3p | <a href="#">FOXQ1</a>     | forkhead box Q1                                                           |
| hsa-miR-128-3p | <a href="#">ZKSCAN4</a>   | zinc finger with KRAB and SCAN domains 4                                  |
| hsa-miR-128-3p | <a href="#">RGPD5</a>     | RANBP2-like and GRIP domain containing 5                                  |
| hsa-miR-128-3p | <a href="#">LDLRAP1</a>   | low density lipoprotein receptor adaptor protein 1                        |
| hsa-miR-128-3p | <a href="#">MAP4K5</a>    | mitogen-activated protein kinase kinase kinase kinase 5                   |
| hsa-miR-128-3p | <a href="#">ELOVL4</a>    | ELOVL fatty acid elongase 4                                               |
| hsa-miR-128-3p | <a href="#">SLC7A1</a>    | solute carrier family 7 member 1                                          |
| hsa-miR-128-3p | <a href="#">FAM13A</a>    | family with sequence similarity 13 member A                               |
| hsa-miR-128-3p | <a href="#">RCOR1</a>     | REST corepressor 1                                                        |
| hsa-miR-128-3p | <a href="#">CDR2L</a>     | cerebellar degeneration related protein 2 like                            |
| hsa-miR-128-3p | <a href="#">FAAP100</a>   | FA core complex associated protein 100                                    |
| hsa-miR-128-3p | <a href="#">PPP2R2D</a>   | protein phosphatase 2 regulatory subunit Bdelta                           |
| hsa-miR-128-3p | <a href="#">NME4</a>      | NME/NM23 nucleoside diphosphate kinase 4                                  |
| hsa-miR-128-3p | <a href="#">SPOPL</a>     | speckle type BTB/POZ protein like                                         |
| hsa-miR-128-3p | <a href="#">CAPN7</a>     | calpain 7                                                                 |
| hsa-miR-128-3p | <a href="#">ID4</a>       | inhibitor of DNA binding 4, HLH protein                                   |
| hsa-miR-128-3p | <a href="#">LRP2BP</a>    | LRP2 binding protein                                                      |
| hsa-miR-128-3p | <a href="#">SLC10A7</a>   | solute carrier family 10 member 7                                         |
| hsa-miR-128-3p | <a href="#">CTPS2</a>     | CTP synthase 2                                                            |
| hsa-miR-128-3p | <a href="#">SLC6A6</a>    | solute carrier family 6 member 6                                          |
| hsa-miR-128-3p | <a href="#">IKZF5</a>     | IKAROS family zinc finger 5                                               |
| hsa-miR-128-3p | <a href="#">TMOD2</a>     | tropomodulin 2                                                            |
| hsa-miR-128-3p | <a href="#">CASP1</a>     | caspase 1                                                                 |
| hsa-miR-128-3p | <a href="#">NEBL</a>      | nebulin                                                                   |
| hsa-miR-128-3p | <a href="#">INAVA</a>     | innate immunity activator                                                 |
| hsa-miR-128-3p | <a href="#">EFR3B</a>     | EFR3 homolog B                                                            |
| hsa-miR-128-3p | <a href="#">VIP</a>       | vasoactive intestinal peptide                                             |
| hsa-miR-128-3p | <a href="#">GYS1</a>      | glycogen synthase 1                                                       |
| hsa-miR-128-3p | <a href="#">PPP2R3A</a>   | protein phosphatase 2 regulatory subunit B"alpha                          |
| hsa-miR-128-3p | <a href="#">SLC9A4</a>    | solute carrier family 9 member A4                                         |
| hsa-miR-128-3p | <a href="#">TRABD2B</a>   | TraB domain containing 2B                                                 |
| hsa-miR-128-3p | <a href="#">CTU1</a>      | cytosolic thiouridylase subunit 1                                         |
| hsa-miR-128-3p | <a href="#">SMPD4</a>     | sphingomyelin phosphodiesterase 4                                         |
| hsa-miR-128-3p | <a href="#">ZNF783</a>    | zinc finger family member 783                                             |
| hsa-miR-128-3p | <a href="#">SNRPE</a>     | small nuclear ribonucleoprotein polypeptide E                             |
| hsa-miR-128-3p | <a href="#">FCHSD2</a>    | FCH and double SH3 domains 2                                              |
| hsa-miR-128-3p | <a href="#">KCNMB4</a>    | potassium calcium-activated channel subfamily M regulatory beta subunit 4 |
| hsa-miR-128-3p | <a href="#">OR11A1</a>    | olfactory receptor family 11 subfamily A member 1                         |
| hsa-miR-128-3p | <a href="#">CFC1</a>      | cripto, FRL-1, cryptic family 1                                           |

|                |                          |                                                           |
|----------------|--------------------------|-----------------------------------------------------------|
| hsa-miR-128-3p | <a href="#">APOF</a>     | apolipoprotein F                                          |
| hsa-miR-128-3p | <a href="#">AGAP1</a>    | ArfGAP with GTPase domain, ankyrin repeat and PH domain 1 |
| hsa-miR-128-3p | <a href="#">ARL15</a>    | ADP ribosylation factor like GTPase 15                    |
| hsa-miR-128-3p | <a href="#">MBNL2</a>    | muscleblind like splicing regulator 2                     |
| hsa-miR-128-3p | <a href="#">FAM71F2</a>  | family with sequence similarity 71 member F2              |
| hsa-miR-128-3p | <a href="#">BTG2</a>     | BTG anti-proliferation factor 2                           |
| hsa-miR-128-3p | <a href="#">KCNK6</a>    | potassium two pore domain channel subfamily K member 6    |
| hsa-miR-128-3p | <a href="#">EDNRA</a>    | endothelin receptor type A                                |
| hsa-miR-128-3p | <a href="#">CCNG1</a>    | cyclin G1                                                 |
| hsa-miR-128-3p | <a href="#">TWISTNB</a>  | TWIST neighbor                                            |
| hsa-miR-128-3p | <a href="#">SIX1</a>     | SIX homeobox 1                                            |
| hsa-miR-128-3p | <a href="#">LINGO4</a>   | leucine rich repeat and Ig domain containing 4            |
| hsa-miR-128-3p | <a href="#">CCDC28B</a>  | coiled-coil domain containing 28B                         |
| hsa-miR-128-3p | <a href="#">FAM222A</a>  | family with sequence similarity 222 member A              |
| hsa-miR-128-3p | <a href="#">BRAP</a>     | BRCA1 associated protein                                  |
| hsa-miR-128-3p | <a href="#">DTNA</a>     | dystrobrevin alpha                                        |
| hsa-miR-128-3p | <a href="#">SLC39A10</a> | solute carrier family 39 member 10                        |
| hsa-miR-128-3p | <a href="#">HOXA13</a>   | homeobox A13                                              |
| hsa-miR-128-3p | <a href="#">SH3GL3</a>   | SH3 domain containing GRB2 like 3, endophilin A3          |
| hsa-miR-128-3p | <a href="#">ZBTB14</a>   | zinc finger and BTB domain containing 14                  |
| hsa-miR-128-3p | <a href="#">SLC9A7</a>   | solute carrier family 9 member A7                         |
| hsa-miR-128-3p | <a href="#">MECP2</a>    | methyl-CpG binding protein 2                              |
| hsa-miR-128-3p | <a href="#">DUSP5</a>    | dual specificity phosphatase 5                            |
| hsa-miR-128-3p | <a href="#">CREG2</a>    | cellular repressor of E1A stimulated genes 2              |
| hsa-miR-128-3p | <a href="#">CSDC2</a>    | cold shock domain containing C2                           |
| hsa-miR-128-3p | <a href="#">NTRK2</a>    | neurotrophic receptor tyrosine kinase 2                   |
| hsa-miR-128-3p | <a href="#">TRAF1</a>    | TNF receptor associated factor 1                          |
| hsa-miR-128-3p | <a href="#">PRLR</a>     | prolactin receptor                                        |
| hsa-miR-128-3p | <a href="#">RIMS3</a>    | regulating synaptic membrane exocytosis 3                 |
| hsa-miR-128-3p | <a href="#">SDK2</a>     | sidekick cell adhesion molecule 2                         |
| hsa-miR-128-3p | <a href="#">ACOT13</a>   | acyl-CoA thioesterase 13                                  |
| hsa-miR-128-3p | <a href="#">WTAP</a>     | WT1 associated protein                                    |
| hsa-miR-128-3p | <a href="#">WDTC1</a>    | WD and tetratricopeptide repeats 1                        |
| hsa-miR-128-3p | <a href="#">APCDD1L</a>  | APC down-regulated 1 like                                 |
| hsa-miR-128-3p | <a href="#">BHLHB9</a>   | basic helix-loop-helix family member b9                   |
| hsa-miR-128-3p | <a href="#">CDH11</a>    | cadherin 11                                               |
| hsa-miR-128-3p | <a href="#">C17orf51</a> | chromosome 17 open reading frame 51                       |
| hsa-miR-128-3p | <a href="#">PWWP3A</a>   | PWWP domain containing 3A, DNA repair factor              |
| hsa-miR-128-3p | <a href="#">CCM2</a>     | CCM2 scaffold protein                                     |
| hsa-miR-128-3p | <a href="#">DHCR24</a>   | 24-dehydrocholesterol reductase                           |
| hsa-miR-128-3p | <a href="#">PIGZ</a>     | phosphatidylinositol glycan anchor biosynthesis class Z   |
| hsa-miR-128-3p | <a href="#">MBD3</a>     | methyl-CpG binding domain protein 3                       |
| hsa-miR-128-3p | <a href="#">PALM2</a>    | paralemmin 2                                              |
| hsa-miR-128-3p | <a href="#">PLEKHH1</a>  | pleckstrin homology, MyTH4 and FERM domain containing H1  |

|                |                          |                                                                             |
|----------------|--------------------------|-----------------------------------------------------------------------------|
| hsa-miR-128-3p | <a href="#">MGAT1</a>    | mannosyl (alpha-1,3-)-glycoprotein beta-1,2-N-acetylglucosaminyltransferase |
| hsa-miR-128-3p | <a href="#">ADRA1A</a>   | adrenoceptor alpha 1A                                                       |
| hsa-miR-128-3p | <a href="#">MR1</a>      | major histocompatibility complex, class I-related                           |
| hsa-miR-128-3p | <a href="#">TRAPPC4</a>  | trafficking protein particle complex 4                                      |
| hsa-miR-128-3p | <a href="#">NECAB1</a>   | N-terminal EF-hand calcium binding protein 1                                |
| hsa-miR-128-3p | <a href="#">IBA57</a>    | IBA57, iron-sulfur cluster assembly                                         |
| hsa-miR-128-3p | <a href="#">XIRP1</a>    | xin actin binding repeat containing 1                                       |
| hsa-miR-128-3p | <a href="#">STOX1</a>    | storkhead box 1                                                             |
| hsa-miR-128-3p | <a href="#">TMEM121B</a> | transmembrane protein 121B                                                  |
| hsa-miR-128-3p | <a href="#">KLHL7</a>    | kelch like family member 7                                                  |
| hsa-miR-128-3p | <a href="#">TSEN34</a>   | tRNA splicing endonuclease subunit 34                                       |
| hsa-miR-128-3p | <a href="#">ZNF546</a>   | zinc finger protein 546                                                     |
| hsa-miR-128-3p | <a href="#">C2CD2</a>    | C2 calcium dependent domain containing 2                                    |
| hsa-miR-128-3p | <a href="#">TACR1</a>    | tachykinin receptor 1                                                       |
| hsa-miR-128-3p | <a href="#">HTT</a>      | huntingtin                                                                  |
| hsa-miR-128-3p | <a href="#">SLX4IP</a>   | SLX4 interacting protein                                                    |
| hsa-miR-128-3p | <a href="#">ZNF627</a>   | zinc finger protein 627                                                     |
| hsa-miR-128-3p | <a href="#">EGFR</a>     | epidermal growth factor receptor                                            |
| hsa-miR-128-3p | <a href="#">HERC3</a>    | HECT and RLD domain containing E3 ubiquitin protein ligase 3                |
| hsa-miR-128-3p | <a href="#">PON2</a>     | paraoxonase 2                                                               |
| hsa-miR-128-3p | <a href="#">THAP11</a>   | THAP domain containing 11                                                   |
| hsa-miR-128-3p | <a href="#">DAD1</a>     | defender against cell death 1                                               |
| hsa-miR-128-3p | <a href="#">ATG2A</a>    | autophagy related 2A                                                        |
| hsa-miR-128-3p | <a href="#">AGFG1</a>    | ArfGAP with FG repeats 1                                                    |
| hsa-miR-128-3p | <a href="#">AEN</a>      | apoptosis enhancing nuclease                                                |
| hsa-miR-128-3p | <a href="#">PNRC2</a>    | proline rich nuclear receptor coactivator 2                                 |
| hsa-miR-128-3p | <a href="#">POU2F3</a>   | POU class 2 homeobox 3                                                      |
| hsa-miR-128-3p | <a href="#">PHLDA2</a>   | pleckstrin homology like domain family A member 2                           |
| hsa-miR-128-3p | <a href="#">KSR2</a>     | kinase suppressor of ras 2                                                  |
| hsa-miR-128-3p | <a href="#">PEAK1</a>    | pseudopodium enriched atypical kinase 1                                     |
| hsa-miR-128-3p | <a href="#">SEMA4D</a>   | semaphorin 4D                                                               |
| hsa-miR-128-3p | <a href="#">CHST11</a>   | carbohydrate sulfotransferase 11                                            |
| hsa-miR-128-3p | <a href="#">RGPD4</a>    | RANBP2-like and GRIP domain containing 4                                    |
| hsa-miR-128-3p | <a href="#">ARID5B</a>   | AT-rich interaction domain 5B                                               |
| hsa-miR-128-3p | <a href="#">NAP1L2</a>   | nucleosome assembly protein 1 like 2                                        |
| hsa-miR-128-3p | <a href="#">PPARG</a>    | peroxisome proliferator activated receptor gamma                            |
| hsa-miR-128-3p | <a href="#">PAPPA</a>    | pappalysin 1                                                                |
| hsa-miR-128-3p | <a href="#">PIK3CA</a>   | phosphatidylinositol-4,5-bisphosphate 3-kinase catalytic subunit alpha      |
| hsa-miR-128-3p | <a href="#">TMEM170B</a> | transmembrane protein 170B                                                  |
| hsa-miR-128-3p | <a href="#">BCL3</a>     | BCL3, transcription coactivator                                             |
| hsa-miR-128-3p | <a href="#">OIT3</a>     | oncoprotein induced transcript 3                                            |
| hsa-miR-128-3p | <a href="#">ERO1B</a>    | endoplasmic reticulum oxidoreductase 1 beta                                 |
| hsa-miR-128-3p | <a href="#">ABCB5</a>    | ATP binding cassette subfamily B member 5                                   |
| hsa-miR-128-3p | <a href="#">MFS6</a>     | major facilitator superfamily domain containing 6                           |

|                |                          |                                                            |
|----------------|--------------------------|------------------------------------------------------------|
| hsa-miR-128-3p | <a href="#">CAMTA1</a>   | calmodulin binding transcription activator 1               |
| hsa-miR-128-3p | <a href="#">TYRP1</a>    | tyrosinase related protein 1                               |
| hsa-miR-128-3p | <a href="#">EARS2</a>    | glutamyl-tRNA synthetase 2, mitochondrial                  |
| hsa-miR-128-3p | <a href="#">TTC17</a>    | tetratricopeptide repeat domain 17                         |
| hsa-miR-128-3p | <a href="#">FCRL2</a>    | Fc receptor like 2                                         |
| hsa-miR-128-3p | <a href="#">IL17RA</a>   | interleukin 17 receptor A                                  |
| hsa-miR-128-3p | <a href="#">NR2F2</a>    | nuclear receptor subfamily 2 group F member 2              |
| hsa-miR-128-3p | <a href="#">FOSB</a>     | FosB proto-oncogene, AP-1 transcription factor subunit     |
| hsa-miR-128-3p | <a href="#">ZNF20</a>    | zinc finger protein 20                                     |
| hsa-miR-128-3p | <a href="#">PTCH1</a>    | patched 1                                                  |
| hsa-miR-128-3p | <a href="#">PRMT8</a>    | protein arginine methyltransferase 8                       |
| hsa-miR-128-3p | <a href="#">COG7</a>     | component of oligomeric golgi complex 7                    |
| hsa-miR-128-3p | <a href="#">MKNK2</a>    | MAP kinase interacting serine/threonine kinase 2           |
| hsa-miR-128-3p | <a href="#">EDEMB3</a>   | ER degradation enhancing alpha-mannosidase like protein 3  |
| hsa-miR-128-3p | <a href="#">LDLR</a>     | low density lipoprotein receptor                           |
| hsa-miR-128-3p | <a href="#">NRIP2</a>    | nuclear receptor interacting protein 2                     |
| hsa-miR-128-3p | <a href="#">MAVS</a>     | mitochondrial antiviral signaling protein                  |
| hsa-miR-128-3p | <a href="#">GID3</a>     | gap junction protein delta 3                               |
| hsa-miR-128-3p | <a href="#">WDR36</a>    | WD repeat domain 36                                        |
| hsa-miR-128-3p | <a href="#">TMEM237</a>  | transmembrane protein 237                                  |
| hsa-miR-128-3p | <a href="#">SPRY2</a>    | sprouty RTK signaling antagonist 2                         |
| hsa-miR-128-3p | <a href="#">CD276</a>    | CD276 molecule                                             |
| hsa-miR-128-3p | <a href="#">KCTD8</a>    | potassium channel tetramerization domain containing 8      |
| hsa-miR-128-3p | <a href="#">LRRTM2</a>   | leucine rich repeat transmembrane neuronal 2               |
| hsa-miR-128-3p | <a href="#">CAMK1D</a>   | calcium/calmodulin dependent protein kinase ID             |
| hsa-miR-128-3p | <a href="#">AGRN</a>     | agrin                                                      |
| hsa-miR-128-3p | <a href="#">RHOT1</a>    | ras homolog family member T1                               |
| hsa-miR-128-3p | <a href="#">CAND1</a>    | cullin associated and neddylation dissociated 1            |
| hsa-miR-128-3p | <a href="#">SOWAHA</a>   | sosondowah ankyrin repeat domain family member A           |
| hsa-miR-128-3p | <a href="#">ENPP1</a>    | ectonucleotide pyrophosphatase/phosphodiesterase 1         |
| hsa-miR-128-3p | <a href="#">ADAMTS16</a> | ADAM metalloproteinase with thrombospondin type 1 motif 16 |
| hsa-miR-128-3p | <a href="#">PSEN1</a>    | presenilin 1                                               |
| hsa-miR-128-3p | <a href="#">NPTX2</a>    | neuronal pentraxin 2                                       |
| hsa-miR-128-3p | <a href="#">ERP27</a>    | endoplasmic reticulum protein 27                           |
| hsa-miR-128-3p | <a href="#">FSTL3</a>    | follistatin like 3                                         |
| hsa-miR-128-3p | <a href="#">CLOCK</a>    | clock circadian regulator                                  |
| hsa-miR-128-3p | <a href="#">ANHX</a>     | anomalous homeobox                                         |
| hsa-miR-128-3p | <a href="#">MOCS3</a>    | molybdenum cofactor synthesis 3                            |
| hsa-miR-128-3p | <a href="#">E4F1</a>     | E4F transcription factor 1                                 |
| hsa-miR-128-3p | <a href="#">ARHGAP23</a> | Rho GTPase activating protein 23                           |
| hsa-miR-128-3p | <a href="#">POLM</a>     | DNA polymerase mu                                          |
| hsa-miR-128-3p | <a href="#">RAD54L2</a>  | RAD54 like 2                                               |
| hsa-miR-128-3p | <a href="#">FKBP3</a>    | FKBP prolyl isomerase 3                                    |
| hsa-miR-128-3p | <a href="#">CLDN22</a>   | claudin 22                                                 |
| hsa-miR-128-3p | <a href="#">NR1D2</a>    | nuclear receptor subfamily 1 group D member 2              |

|                |                          |                                                            |
|----------------|--------------------------|------------------------------------------------------------|
| hsa-miR-128-3p | <a href="#">PDE6A</a>    | phosphodiesterase 6A                                       |
| hsa-miR-128-3p | <a href="#">STAC</a>     | SH3 and cysteine rich domain                               |
| hsa-miR-128-3p | <a href="#">LMBR1L</a>   | limb development membrane protein 1 like                   |
| hsa-miR-128-3p | <a href="#">ARID3B</a>   | AT-rich interaction domain 3B                              |
| hsa-miR-128-3p | <a href="#">ZC3H12C</a>  | zinc finger CCCH-type containing 12C                       |
| hsa-miR-128-3p | <a href="#">EPHA10</a>   | EPH receptor A10                                           |
| hsa-miR-128-3p | <a href="#">DDX3Y</a>    | DEAD-box helicase 3 Y-linked                               |
| hsa-miR-128-3p | <a href="#">MYH10</a>    | myosin heavy chain 10                                      |
| hsa-miR-128-3p | <a href="#">VASH2</a>    | vasohibin 2                                                |
| hsa-miR-128-3p | <a href="#">TGIF2</a>    | TGFB induced factor homeobox 2                             |
| hsa-miR-128-3p | <a href="#">CACNA1C</a>  | calcium voltage-gated channel subunit alpha1 C             |
| hsa-miR-128-3p | <a href="#">ANKRD24</a>  | ankyrin repeat domain 24                                   |
| hsa-miR-128-3p | <a href="#">ADH5</a>     | alcohol dehydrogenase 5 (class III), chi polypeptide       |
| hsa-miR-128-3p | <a href="#">SLC36A1</a>  | solute carrier family 36 member 1                          |
| hsa-miR-128-3p | <a href="#">ABCA1</a>    | ATP binding cassette subfamily A member 1                  |
| hsa-miR-128-3p | <a href="#">HMOX1</a>    | heme oxygenase 1                                           |
| hsa-miR-128-3p | <a href="#">RAPGEF2</a>  | Rap guanine nucleotide exchange factor 2                   |
| hsa-miR-128-3p | <a href="#">HOXC6</a>    | homeobox C6                                                |
| hsa-miR-128-3p | <a href="#">PVR</a>      | poliovirus receptor                                        |
| hsa-miR-128-3p | <a href="#">MLPH</a>     | melanophilin                                               |
| hsa-miR-128-3p | <a href="#">MAGEB16</a>  | MAGE family member B16                                     |
| hsa-miR-128-3p | <a href="#">CHD2</a>     | chromodomain helicase DNA binding protein 2                |
| hsa-miR-128-3p | <a href="#">SPTLC2</a>   | serine palmitoyltransferase long chain base subunit 2      |
| hsa-miR-128-3p | <a href="#">C18orf65</a> | chromosome 18 open reading frame 65                        |
| hsa-miR-128-3p | <a href="#">ARX</a>      | aristaless related homeobox                                |
| hsa-miR-128-3p | <a href="#">TSPAN13</a>  | tetraspanin 13                                             |
| hsa-miR-128-3p | <a href="#">STYK1</a>    | serine/threonine/tyrosine kinase 1                         |
| hsa-miR-128-3p | <a href="#">KCNA6</a>    | potassium voltage-gated channel subfamily A member 6       |
| hsa-miR-128-3p | <a href="#">RSPO3</a>    | R-spondin 3                                                |
| hsa-miR-128-3p | <a href="#">KDM4C</a>    | lysine demethylase 4C                                      |
| hsa-miR-128-3p | <a href="#">WSB1</a>     | WD repeat and SOCS box containing 1                        |
| hsa-miR-128-3p | <a href="#">SPX</a>      | spexin hormone                                             |
| hsa-miR-128-3p | <a href="#">RGS1</a>     | regulator of G protein signaling 1                         |
| hsa-miR-128-3p | <a href="#">CBX5</a>     | chromobox 5                                                |
| hsa-miR-128-3p | <a href="#">MAN2A1</a>   | mannosidase alpha class 2A member 1                        |
| hsa-miR-128-3p | <a href="#">RARB</a>     | retinoic acid receptor beta                                |
| hsa-miR-128-3p | <a href="#">TSTD2</a>    | thiosulfate sulfurtransferase like domain containing 2     |
| hsa-miR-128-3p | <a href="#">HSPD1</a>    | heat shock protein family D (Hsp60) member 1               |
| hsa-miR-128-3p | <a href="#">TNRC6B</a>   | trinucleotide repeat containing 6B                         |
| hsa-miR-128-3p | <a href="#">ZNF124</a>   | zinc finger protein 124                                    |
| hsa-miR-128-3p | <a href="#">DEPDC4</a>   | DEP domain containing 4                                    |
| hsa-miR-128-3p | <a href="#">SCN2B</a>    | sodium voltage-gated channel beta subunit 2                |
| hsa-miR-128-3p | <a href="#">SLCO1A2</a>  | solute carrier organic anion transporter family member 1A2 |
| hsa-miR-128-3p | <a href="#">KIAA1211</a> | KIAA1211                                                   |
| hsa-miR-128-3p | <a href="#">DLG2</a>     | discs large MAGUK scaffold protein 2                       |



|                |                              |                                                          |
|----------------|------------------------------|----------------------------------------------------------|
| hsa-miR-128-3p | <a href="#">NKTR</a>         | natural killer cell triggering receptor                  |
| hsa-miR-128-3p | <a href="#">TET2</a>         | tet methylcytosine dioxygenase 2                         |
| hsa-miR-128-3p | <a href="#">LOC101928841</a> | collagen alpha-1(II) chain-like                          |
| hsa-miR-128-3p | <a href="#">DEPDC1B</a>      | DEP domain containing 1B                                 |
| hsa-miR-128-3p | <a href="#">CEP135</a>       | centrosomal protein 135                                  |
| hsa-miR-128-3p | <a href="#">FAM118A</a>      | family with sequence similarity 118 member A             |
| hsa-miR-128-3p | <a href="#">LMNB1</a>        | lamin B1                                                 |
| hsa-miR-128-3p | <a href="#">NCAN</a>         | neurocan                                                 |
| hsa-miR-128-3p | <a href="#">KAT2A</a>        | lysine acetyltransferase 2A                              |
| hsa-miR-128-3p | <a href="#">PPP4R2</a>       | protein phosphatase 4 regulatory subunit 2               |
| hsa-miR-128-3p | <a href="#">SUCO</a>         | SUN domain containing ossification factor                |
| hsa-miR-128-3p | <a href="#">RAB33B</a>       | RAB33B, member RAS oncogene family                       |
| hsa-miR-128-3p | <a href="#">PAQR9</a>        | progesterin and adipoQ receptor family member 9          |
| hsa-miR-128-3p | <a href="#">TNFSF8</a>       | TNF superfamily member 8                                 |
| hsa-miR-128-3p | <a href="#">RLIM</a>         | ring finger protein, LIM domain interacting              |
| hsa-miR-128-3p | <a href="#">SLFN11</a>       | schlafen family member 11                                |
| hsa-miR-128-3p | <a href="#">ZC3H13</a>       | zinc finger CCCH-type containing 13                      |
| hsa-miR-128-3p | <a href="#">PTGDR</a>        | prostaglandin D2 receptor                                |
| hsa-miR-128-3p | <a href="#">EXD1</a>         | exonuclease 3'-5' domain containing 1                    |
| hsa-miR-128-3p | <a href="#">ZNF385C</a>      | zinc finger protein 385C                                 |
| hsa-miR-128-3p | <a href="#">GLRX</a>         | glutaredoxin                                             |
| hsa-miR-128-3p | <a href="#">METTL8</a>       | methyltransferase like 8                                 |
| hsa-miR-128-3p | <a href="#">ARFGEF3</a>      | ARFGEF family member 3                                   |
| hsa-miR-128-3p | <a href="#">TOPBP1</a>       | DNA topoisomerase II binding protein 1                   |
| hsa-miR-128-3p | <a href="#">SMCR8</a>        | Smith-Magenis syndrome chromosome region, candidate 8    |
| hsa-miR-128-3p | <a href="#">TMEM39A</a>      | transmembrane protein 39A                                |
| hsa-miR-128-3p | <a href="#">MSRB3</a>        | methionine sulfoxide reductase B3                        |
| hsa-miR-128-3p | <a href="#">LHX1</a>         | LIM homeobox 1                                           |
| hsa-miR-128-3p | <a href="#">ERI1</a>         | exoribonuclease 1                                        |
| hsa-miR-128-3p | <a href="#">KBTBD8</a>       | kelch repeat and BTB domain containing 8                 |
| hsa-miR-128-3p | <a href="#">CYP4F2</a>       | cytochrome P450 family 4 subfamily F member 2            |
| hsa-miR-128-3p | <a href="#">CEBPE</a>        | CCAAT enhancer binding protein epsilon                   |
| hsa-miR-128-3p | <a href="#">IL16</a>         | interleukin 16                                           |
| hsa-miR-128-3p | <a href="#">RCAN3</a>        | RCAN family member 3                                     |
| hsa-miR-128-3p | <a href="#">PTCD2</a>        | pentatricopeptide repeat domain 2                        |
| hsa-miR-128-3p | <a href="#">DIRAS2</a>       | DIRAS family GTPase 2                                    |
| hsa-miR-128-3p | <a href="#">SLC26A2</a>      | solute carrier family 26 member 2                        |
| hsa-miR-128-3p | <a href="#">RIMS1</a>        | regulating synaptic membrane exocytosis 1                |
| hsa-miR-128-3p | <a href="#">C16orf54</a>     | chromosome 16 open reading frame 54                      |
| hsa-miR-128-3p | <a href="#">CIART</a>        | circadian associated repressor of transcription          |
| hsa-miR-128-3p | <a href="#">HDHD2</a>        | haloacid dehalogenase like hydrolase domain containing 2 |
| hsa-miR-128-3p | <a href="#">PTGER4</a>       | prostaglandin E receptor 4                               |
| hsa-miR-128-3p | <a href="#">NEK1</a>         | NIMA related kinase 1                                    |
| hsa-miR-128-3p | <a href="#">APAF1</a>        | apoptotic peptidase activating factor 1                  |
| hsa-miR-128-3p | <a href="#">STK3</a>         | serine/threonine kinase 3                                |

|                |                          |                                                                |
|----------------|--------------------------|----------------------------------------------------------------|
| hsa-miR-128-3p | <a href="#">EIF4EBP2</a> | eukaryotic translation initiation factor 4E binding protein 2  |
| hsa-miR-128-3p | <a href="#">ZNF587B</a>  | zinc finger protein 587B                                       |
| hsa-miR-128-3p | <a href="#">CDS2</a>     | CDP-diacylglycerol synthase 2                                  |
| hsa-miR-128-3p | <a href="#">ADAM19</a>   | ADAM metalloproteinase domain 19                               |
| hsa-miR-128-3p | <a href="#">GPR35</a>    | G protein-coupled receptor 35                                  |
| hsa-miR-128-3p | <a href="#">THRB</a>     | thyroid hormone receptor beta                                  |
| hsa-miR-128-3p | <a href="#">MPP2</a>     | membrane palmitoylated protein 2                               |
| hsa-miR-128-3p | <a href="#">MLYCD</a>    | malonyl-CoA decarboxylase                                      |
| hsa-miR-128-3p | <a href="#">TNPO3</a>    | transportin 3                                                  |
| hsa-miR-128-3p | <a href="#">MARK1</a>    | microtubule affinity regulating kinase 1                       |
| hsa-miR-128-3p | <a href="#">EPB41L2</a>  | erythrocyte membrane protein band 4.1 like 2                   |
| hsa-miR-128-3p | <a href="#">UMAD1</a>    | UBAP1-MVB12-associated (UMA) domain containing 1               |
| hsa-miR-128-3p | <a href="#">PTAFR</a>    | platelet activating factor receptor                            |
| hsa-miR-128-3p | <a href="#">IFNA1</a>    | interferon alpha 1                                             |
| hsa-miR-128-3p | <a href="#">TBP</a>      | TATA-box binding protein                                       |
| hsa-miR-128-3p | <a href="#">TRIM50</a>   | tripartite motif containing 50                                 |
| hsa-miR-128-3p | <a href="#">LETMD1</a>   | LETM1 domain containing 1                                      |
| hsa-miR-128-3p | <a href="#">PIGT</a>     | phosphatidylinositol glycan anchor biosynthesis class T        |
| hsa-miR-128-3p | <a href="#">ZSCAN20</a>  | zinc finger and SCAN domain containing 20                      |
| hsa-miR-128-3p | <a href="#">CD93</a>     | CD93 molecule                                                  |
| hsa-miR-128-3p | <a href="#">SP100</a>    | SP100 nuclear antigen                                          |
| hsa-miR-128-3p | <a href="#">XKRY2</a>    | XK related, Y-linked 2                                         |
| hsa-miR-128-3p | <a href="#">GVQW2</a>    | GVQW motif containing 2                                        |
| hsa-miR-128-3p | <a href="#">CYB561D1</a> | cytochrome b561 family member D1                               |
| hsa-miR-128-3p | <a href="#">TBCC</a>     | tubulin folding cofactor C                                     |
| hsa-miR-128-3p | <a href="#">EFNB2</a>    | ephrin B2                                                      |
| hsa-miR-128-3p | <a href="#">HIVEP3</a>   | human immunodeficiency virus type I enhancer binding protein 3 |
| hsa-miR-128-3p | <a href="#">RPGRIP1L</a> | RPGRIP1 like                                                   |
| hsa-miR-128-3p | <a href="#">TTC39C</a>   | tetratricopeptide repeat domain 39C                            |
| hsa-miR-128-3p | <a href="#">NCOA5</a>    | nuclear receptor coactivator 5                                 |
| hsa-miR-128-3p | <a href="#">HSPA1L</a>   | heat shock protein family A (Hsp70) member 1 like              |
| hsa-miR-128-3p | <a href="#">ARHGEF11</a> | Rho guanine nucleotide exchange factor 11                      |
| hsa-miR-128-3p | <a href="#">XKRY</a>     | XK related, Y-linked                                           |
| hsa-miR-128-3p | <a href="#">VEGFB</a>    | vascular endothelial growth factor B                           |
| hsa-miR-128-3p | <a href="#">STAM</a>     | signal transducing adaptor molecule                            |
| hsa-miR-128-3p | <a href="#">TNFAIP3</a>  | TNF alpha induced protein 3                                    |
| hsa-miR-128-3p | <a href="#">DPYS</a>     | dihydropyrimidinase                                            |
| hsa-miR-128-3p | <a href="#">PAXBP1</a>   | PAX3 and PAX7 binding protein 1                                |
| hsa-miR-128-3p | <a href="#">NRIP1</a>    | nuclear receptor interacting protein 1                         |
| hsa-miR-132-3p | <a href="#">CDK19</a>    | cyclin dependent kinase 19                                     |
| hsa-miR-132-3p | <a href="#">TIMM9</a>    | translocase of inner mitochondrial membrane 9                  |
| hsa-miR-132-3p | <a href="#">LEMD3</a>    | LEM domain containing 3                                        |
| hsa-miR-132-3p | <a href="#">RGS7BP</a>   | regulator of G protein signaling 7 binding protein             |
| hsa-miR-132-3p | <a href="#">MIA3</a>     | MIA SH3 domain ER export factor 3                              |
| hsa-miR-132-3p | <a href="#">MIER1</a>    | MIER1 transcriptional regulator                                |

|                |                         |                                                       |
|----------------|-------------------------|-------------------------------------------------------|
| hsa-miR-132-3p | <a href="#">SOX5</a>    | SRY-box 5                                             |
| hsa-miR-132-3p | <a href="#">CBLL1</a>   | Cbl proto-oncogene like 1                             |
| hsa-miR-132-3p | <a href="#">METTL25</a> | methyltransferase like 25                             |
| hsa-miR-132-3p | <a href="#">GTF2H1</a>  | general transcription factor IIH subunit 1            |
| hsa-miR-132-3p | <a href="#">MEX3C</a>   | mex-3 RNA binding family member C                     |
| hsa-miR-132-3p | <a href="#">MAPK1</a>   | mitogen-activated protein kinase 1                    |
| hsa-miR-132-3p | <a href="#">RASA1</a>   | RAS p21 protein activator 1                           |
| hsa-miR-132-3p | <a href="#">CHD1</a>    | chromodomain helicase DNA binding protein 1           |
| hsa-miR-132-3p | <a href="#">MELK</a>    | maternal embryonic leucine zipper kinase              |
| hsa-miR-132-3p | <a href="#">CSDE1</a>   | cold shock domain containing E1                       |
| hsa-miR-132-3p | <a href="#">TUT4</a>    | terminal uridylyl transferase 4                       |
| hsa-miR-132-3p | <a href="#">ZBTB20</a>  | zinc finger and BTB domain containing 20              |
| hsa-miR-132-3p | <a href="#">BRWD1</a>   | bromodomain and WD repeat domain containing 1         |
| hsa-miR-132-3p | <a href="#">SSH2</a>    | slingshot protein phosphatase 2                       |
| hsa-miR-132-3p | <a href="#">FEM1C</a>   | fem-1 homolog C                                       |
| hsa-miR-132-3p | <a href="#">SGK3</a>    | serum/glucocorticoid regulated kinase family member 3 |
| hsa-miR-132-3p | <a href="#">USP38</a>   | ubiquitin specific peptidase 38                       |
| hsa-miR-132-3p | <a href="#">DAZAP2</a>  | DAZ associated protein 2                              |
| hsa-miR-132-3p | <a href="#">VDAC2</a>   | voltage dependent anion channel 2                     |
| hsa-miR-132-3p | <a href="#">CCDC88A</a> | coiled-coil domain containing 88A                     |
| hsa-miR-132-3p | <a href="#">MTF2</a>    | metal response element binding transcription factor 2 |
| hsa-miR-132-3p | <a href="#">ZNF521</a>  | zinc finger protein 521                               |
| hsa-miR-132-3p | <a href="#">SOD2</a>    | superoxide dismutase 2                                |
| hsa-miR-132-3p | <a href="#">MYCBP2</a>  | MYC binding protein 2, E3 ubiquitin protein ligase    |
| hsa-miR-132-3p | <a href="#">PTBP2</a>   | polypyrimidine tract binding protein 2                |
| hsa-miR-132-3p | <a href="#">HBEGF</a>   | heparin binding EGF like growth factor                |
| hsa-miR-132-3p | <a href="#">ZNF652</a>  | zinc finger protein 652                               |
| hsa-miR-132-3p | <a href="#">PCDH10</a>  | protocadherin 10                                      |
| hsa-miR-132-3p | <a href="#">ETNK1</a>   | ethanolamine kinase 1                                 |
| hsa-miR-132-3p | <a href="#">TJAP1</a>   | tight junction associated protein 1                   |
| hsa-miR-132-3p | <a href="#">SERP1</a>   | stress associated endoplasmic reticulum protein 1     |
| hsa-miR-132-3p | <a href="#">SETD5</a>   | SET domain containing 5                               |
| hsa-miR-132-3p | <a href="#">NFE2L2</a>  | nuclear factor, erythroid 2 like 2                    |
| hsa-miR-132-3p | <a href="#">KLF7</a>    | Kruppel like factor 7                                 |
| hsa-miR-132-3p | <a href="#">OSBPL8</a>  | oxysterol binding protein like 8                      |
| hsa-miR-132-3p | <a href="#">ZNF516</a>  | zinc finger protein 516                               |
| hsa-miR-132-3p | <a href="#">SPPL3</a>   | signal peptide peptidase like 3                       |
| hsa-miR-132-3p | <a href="#">SLC6A1</a>  | solute carrier family 6 member 1                      |
| hsa-miR-132-3p | <a href="#">CCN2</a>    | cellular communication network factor 2               |
| hsa-miR-132-3p | <a href="#">DAAM1</a>   | dishevelled associated activator of morphogenesis 1   |
| hsa-miR-132-3p | <a href="#">HHIP</a>    | hedgehog interacting protein                          |
| hsa-miR-132-3p | <a href="#">NMNAT2</a>  | nicotinamide nucleotide adenylyltransferase 2         |
| hsa-miR-132-3p | <a href="#">HNRNPH1</a> | heterogeneous nuclear ribonucleoprotein H1            |
| hsa-miR-132-3p | <a href="#">NOVA1</a>   | NOVA alternative splicing regulator 1                 |
| hsa-miR-132-3p | <a href="#">SKAP2</a>   | src kinase associated phosphoprotein 2                |

|                |                              |                                                                      |
|----------------|------------------------------|----------------------------------------------------------------------|
| hsa-miR-132-3p | <a href="#">SAP30L</a>       | SAP30 like                                                           |
| hsa-miR-132-3p | <a href="#">TLN2</a>         | talin 2                                                              |
| hsa-miR-132-3p | <a href="#">FBXL20</a>       | F-box and leucine rich repeat protein 20                             |
| hsa-miR-132-3p | <a href="#">GMFB</a>         | glia maturation factor beta                                          |
| hsa-miR-132-3p | <a href="#">PPM1G</a>        | protein phosphatase, Mg <sup>2+</sup> /Mn <sup>2+</sup> dependent 1G |
| hsa-miR-132-3p | <a href="#">NVL</a>          | nuclear VCP-like                                                     |
| hsa-miR-132-3p | <a href="#">RUFY3</a>        | RUN and FYVE domain containing 3                                     |
| hsa-miR-132-3p | <a href="#">RPP14</a>        | ribonuclease P/MRP subunit p14                                       |
| hsa-miR-132-3p | <a href="#">ELMSAN1</a>      | ELM2 and Myb/SANT domain containing 1                                |
| hsa-miR-132-3p | <a href="#">SLC25A28</a>     | solute carrier family 25 member 28                                   |
| hsa-miR-132-3p | <a href="#">DCC</a>          | DCC netrin 1 receptor                                                |
| hsa-miR-132-3p | <a href="#">FAM227A</a>      | family with sequence similarity 227 member A                         |
| hsa-miR-132-3p | <a href="#">ASF1A</a>        | anti-silencing function 1A histone chaperone                         |
| hsa-miR-132-3p | <a href="#">RB1</a>          | RB transcriptional corepressor 1                                     |
| hsa-miR-132-3p | <a href="#">NACC2</a>        | NACC family member 2                                                 |
| hsa-miR-132-3p | <a href="#">L3MBTL3</a>      | L3MBTL3, histone methyl-lysine binding protein                       |
| hsa-miR-132-3p | <a href="#">MEF2A</a>        | myocyte enhancer factor 2A                                           |
| hsa-miR-132-3p | <a href="#">ACVR2B</a>       | activin A receptor type 2B                                           |
| hsa-miR-132-3p | <a href="#">KCMF1</a>        | potassium channel modulatory factor 1                                |
| hsa-miR-132-3p | <a href="#">STX16</a>        | syntaxin 16                                                          |
| hsa-miR-132-3p | <a href="#">USP9X</a>        | ubiquitin specific peptidase 9 X-linked                              |
| hsa-miR-132-3p | <a href="#">TMEM164</a>      | transmembrane protein 164                                            |
| hsa-miR-132-3p | <a href="#">PHF12</a>        | PHD finger protein 12                                                |
| hsa-miR-132-3p | <a href="#">PAM</a>          | peptidylglycine alpha-amidating monooxygenase                        |
| hsa-miR-132-3p | <a href="#">CAMSAP2</a>      | calmodulin regulated spectrin associated protein family member 2     |
| hsa-miR-132-3p | <a href="#">sept-08</a>      | septin 8                                                             |
| hsa-miR-132-3p | <a href="#">ENPP4</a>        | ectonucleotide pyrophosphatase/phosphodiesterase 4                   |
| hsa-miR-132-3p | <a href="#">ATXN1</a>        | ataxin 1                                                             |
| hsa-miR-132-3p | <a href="#">FAM167A</a>      | family with sequence similarity 167 member A                         |
| hsa-miR-132-3p | <a href="#">BRI3</a>         | brain protein I3                                                     |
| hsa-miR-132-3p | <a href="#">MIS12</a>        | MIS12, kinetochore complex component                                 |
| hsa-miR-132-3p | <a href="#">SIRT1</a>        | sirtuin 1                                                            |
| hsa-miR-132-3p | <a href="#">C8orf44-SGK3</a> | C8orf44-SGK3 readthrough                                             |
| hsa-miR-132-3p | <a href="#">KDM5A</a>        | lysine demethylase 5A                                                |
| hsa-miR-132-3p | <a href="#">ALKAL1</a>       | ALK and LTK ligand 1                                                 |
| hsa-miR-132-3p | <a href="#">SOX11</a>        | SRY-box 11                                                           |
| hsa-miR-132-3p | <a href="#">GRM3</a>         | glutamate metabotropic receptor 3                                    |
| hsa-miR-132-3p | <a href="#">CELSR3</a>       | cadherin EGF LAG seven-pass G-type receptor 3                        |
| hsa-miR-132-3p | <a href="#">SLC26A7</a>      | solute carrier family 26 member 7                                    |
| hsa-miR-132-3p | <a href="#">SYN2</a>         | synapsin II                                                          |
| hsa-miR-132-3p | <a href="#">LIN28B</a>       | lin-28 homolog B                                                     |
| hsa-miR-132-3p | <a href="#">NLK</a>          | nemo like kinase                                                     |
| hsa-miR-132-3p | <a href="#">NREP</a>         | neuronal regeneration related protein                                |
| hsa-miR-132-3p | <a href="#">SEC16A</a>       | SEC16 homolog A, endoplasmic reticulum export factor                 |

|                |                          |                                                           |
|----------------|--------------------------|-----------------------------------------------------------|
| hsa-miR-132-3p | <a href="#">KCNK2</a>    | potassium two pore domain channel subfamily K member 2    |
| hsa-miR-132-3p | <a href="#">FBXO9</a>    | F-box protein 9                                           |
| hsa-miR-132-3p | <a href="#">CLMN</a>     | calmin                                                    |
| hsa-miR-132-3p | <a href="#">FAM91A1</a>  | family with sequence similarity 91 member A1              |
| hsa-miR-132-3p | <a href="#">COL11A1</a>  | collagen type XI alpha 1 chain                            |
| hsa-miR-132-3p | <a href="#">DPYSL3</a>   | dihydropyrimidinase like 3                                |
| hsa-miR-132-3p | <a href="#">HNRNPM</a>   | heterogeneous nuclear ribonucleoprotein M                 |
| hsa-miR-132-3p | <a href="#">SEMA6A</a>   | semaphorin 6A                                             |
| hsa-miR-132-3p | <a href="#">SCN3A</a>    | sodium voltage-gated channel alpha subunit 3              |
| hsa-miR-132-3p | <a href="#">SALL4</a>    | spalt like transcription factor 4                         |
| hsa-miR-132-3p | <a href="#">BOLL</a>     | boule homolog, RNA binding protein                        |
| hsa-miR-132-3p | <a href="#">SALL1</a>    | spalt like transcription factor 1                         |
| hsa-miR-132-3p | <a href="#">ARID2</a>    | AT-rich interaction domain 2                              |
| hsa-miR-132-3p | <a href="#">ARMC8</a>    | armadillo repeat containing 8                             |
| hsa-miR-132-3p | <a href="#">RAD54L2</a>  | RAD54 like 2                                              |
| hsa-miR-132-3p | <a href="#">INPP5K</a>   | inositol polyphosphate-5-phosphatase K                    |
| hsa-miR-132-3p | <a href="#">SPRED1</a>   | sprouty related EVH1 domain containing 1                  |
| hsa-miR-132-3p | <a href="#">ZHX1</a>     | zinc fingers and homeoboxes 1                             |
| hsa-miR-132-3p | <a href="#">CCDC71L</a>  | coiled-coil domain containing 71 like                     |
| hsa-miR-132-3p | <a href="#">NFATC2</a>   | nuclear factor of activated T cells 2                     |
| hsa-miR-132-3p | <a href="#">LRRC58</a>   | leucine rich repeat containing 58                         |
| hsa-miR-132-3p | <a href="#">SRGAP1</a>   | SLIT-ROBO Rho GTPase activating protein 1                 |
| hsa-miR-132-3p | <a href="#">ADAMTS5</a>  | ADAM metalloproteinase with thrombospondin type 1 motif 5 |
| hsa-miR-132-3p | <a href="#">GPD2</a>     | glycerol-3-phosphate dehydrogenase 2                      |
| hsa-miR-132-3p | <a href="#">CACNG2</a>   | calcium voltage-gated channel auxiliary subunit gamma 2   |
| hsa-miR-132-3p | <a href="#">CALU</a>     | calumenin                                                 |
| hsa-miR-132-3p | <a href="#">TMEM64</a>   | transmembrane protein 64                                  |
| hsa-miR-132-3p | <a href="#">PGM5</a>     | phosphoglucomutase 5                                      |
| hsa-miR-132-3p | <a href="#">ARID1B</a>   | AT-rich interaction domain 1B                             |
| hsa-miR-132-3p | <a href="#">PSMD12</a>   | proteasome 26S subunit, non-ATPase 12                     |
| hsa-miR-132-3p | <a href="#">KRTAP4-1</a> | keratin associated protein 4-1                            |
| hsa-miR-132-3p | <a href="#">WDR5B</a>    | WD repeat domain 5B                                       |
| hsa-miR-132-3p | <a href="#">RICTOR</a>   | RPTOR independent companion of MTOR complex 2             |
| hsa-miR-132-3p | <a href="#">ZNF451</a>   | zinc finger protein 451                                   |
| hsa-miR-132-3p | <a href="#">EP300</a>    | E1A binding protein p300                                  |
| hsa-miR-132-3p | <a href="#">CD300LF</a>  | CD300 molecule like family member f                       |
| hsa-miR-132-3p | <a href="#">MED9</a>     | mediator complex subunit 9                                |
| hsa-miR-132-3p | <a href="#">SPATA13</a>  | spermatogenesis associated 13                             |
| hsa-miR-132-3p | <a href="#">CCDC34</a>   | coiled-coil domain containing 34                          |
| hsa-miR-132-3p | <a href="#">AZIN1</a>    | antizyme inhibitor 1                                      |
| hsa-miR-132-3p | <a href="#">POM121</a>   | POM121 transmembrane nucleoporin                          |
| hsa-miR-132-3p | <a href="#">TSPAN6</a>   | tetraspanin 6                                             |
| hsa-miR-132-3p | <a href="#">SLC1A3</a>   | solute carrier family 1 member 3                          |

|                |                          |                                                              |
|----------------|--------------------------|--------------------------------------------------------------|
| hsa-miR-132-3p | <a href="#">AMD1</a>     | adenosylmethionine decarboxylase 1                           |
| hsa-miR-132-3p | <a href="#">GPATCH2L</a> | G-patch domain containing 2 like                             |
| hsa-miR-132-3p | <a href="#">CACNB1</a>   | calcium voltage-gated channel auxiliary subunit beta 1       |
| hsa-miR-132-3p | <a href="#">E2F5</a>     | E2F transcription factor 5                                   |
| hsa-miR-132-3p | <a href="#">GDF5</a>     | growth differentiation factor 5                              |
| hsa-miR-132-3p | <a href="#">FOXO3</a>    | forkhead box O3                                              |
| hsa-miR-132-3p | <a href="#">AGO1</a>     | argonaute RISC catalytic component 1                         |
| hsa-miR-132-3p | <a href="#">KCNN3</a>    | potassium calcium-activated channel subfamily N member 3     |
| hsa-miR-132-3p | <a href="#">MUC13</a>    | mucin 13, cell surface associated                            |
| hsa-miR-132-3p | <a href="#">G3BP2</a>    | G3BP stress granule assembly factor 2                        |
| hsa-miR-132-3p | <a href="#">SS18</a>     | SS18, nBAF chromatin remodeling complex subunit              |
| hsa-miR-132-3p | <a href="#">CBWD1</a>    | COBW domain containing 1                                     |
| hsa-miR-132-3p | <a href="#">NTNG1</a>    | netrin G1                                                    |
| hsa-miR-132-3p | <a href="#">KCNA6</a>    | potassium voltage-gated channel subfamily A member 6         |
| hsa-miR-132-3p | <a href="#">TMEM136</a>  | transmembrane protein 136                                    |
| hsa-miR-132-3p | <a href="#">CBWD3</a>    | COBW domain containing 3                                     |
| hsa-miR-132-3p | <a href="#">RPL31</a>    | ribosomal protein L31                                        |
| hsa-miR-132-3p | <a href="#">SIX4</a>     | SIX homeobox 4                                               |
| hsa-miR-132-3p | <a href="#">DYRK2</a>    | dual specificity tyrosine phosphorylation regulated kinase 2 |
| hsa-miR-132-3p | <a href="#">SLC30A6</a>  | solute carrier family 30 member 6                            |
| hsa-miR-132-3p | <a href="#">TMEM178B</a> | transmembrane protein 178B                                   |
| hsa-miR-132-3p | <a href="#">TRNAU1AP</a> | tRNA selenocysteine 1 associated protein 1                   |
| hsa-miR-132-3p | <a href="#">ZYG11A</a>   | zyg-11 family member A, cell cycle regulator                 |
| hsa-miR-132-3p | <a href="#">TRDN</a>     | triadin                                                      |
| hsa-miR-132-3p | <a href="#">H2AFZ</a>    | H2A histone family member Z                                  |
| hsa-miR-132-3p | <a href="#">DDX5</a>     | DEAD-box helicase 5                                          |
| hsa-miR-132-3p | <a href="#">RHOQ</a>     | ras homolog family member Q                                  |
| hsa-miR-132-3p | <a href="#">DUSP9</a>    | dual specificity phosphatase 9                               |
| hsa-miR-132-3p | <a href="#">SIPA1L2</a>  | signal induced proliferation associated 1 like 2             |
| hsa-miR-132-3p | <a href="#">DIPK2A</a>   | divergent protein kinase domain 2A                           |
| hsa-miR-132-3p | <a href="#">AEBP2</a>    | AE binding protein 2                                         |
| hsa-miR-132-3p | <a href="#">LSM11</a>    | LSM11, U7 small nuclear RNA associated                       |
| hsa-miR-132-3p | <a href="#">CNR1</a>     | cannabinoid receptor 1                                       |
| hsa-miR-132-3p | <a href="#">DCUN1D4</a>  | defective in cullin neddylation 1 domain containing 4        |
| hsa-miR-132-3p | <a href="#">CBWD2</a>    | COBW domain containing 2                                     |
| hsa-miR-132-3p | <a href="#">KIAA2026</a> | KIAA2026                                                     |
| hsa-miR-132-3p | <a href="#">FAM76B</a>   | family with sequence similarity 76 member B                  |
| hsa-miR-132-3p | <a href="#">GVQW2</a>    | GVQW motif containing 2                                      |
| hsa-miR-132-3p | <a href="#">MTMR10</a>   | myotubularin related protein 10                              |
| hsa-miR-132-3p | <a href="#">ADCY3</a>    | adenylate cyclase 3                                          |
| hsa-miR-132-3p | <a href="#">FRS2</a>     | fibroblast growth factor receptor substrate 2                |
| hsa-miR-132-3p | <a href="#">ATP10D</a>   | ATPase phospholipid transporting 10D (putative)              |
| hsa-miR-132-3p | <a href="#">AMER2</a>    | APC membrane recruitment protein 2                           |



|                |                          |                                                             |
|----------------|--------------------------|-------------------------------------------------------------|
| hsa-miR-132-3p | <a href="#">EFCAB9</a>   | EF-hand calcium binding domain 9                            |
| hsa-miR-132-3p | <a href="#">CC2D1B</a>   | coiled-coil and C2 domain containing 1B                     |
| hsa-miR-132-3p | <a href="#">STAG1</a>    | stromal antigen 1                                           |
| hsa-miR-132-3p | <a href="#">MAP3K3</a>   | mitogen-activated protein kinase kinase kinase 3            |
| hsa-miR-132-3p | <a href="#">ARNT</a>     | aryl hydrocarbon receptor nuclear translocator              |
| hsa-miR-132-3p | <a href="#">LRRFIP1</a>  | LRR binding FLII interacting protein 1                      |
| hsa-miR-132-3p | <a href="#">CASP7</a>    | caspase 7                                                   |
| hsa-miR-132-3p | <a href="#">PYURF</a>    | PIGY upstream reading frame                                 |
| hsa-miR-132-3p | <a href="#">MAOA</a>     | monoamine oxidase A                                         |
| hsa-miR-132-3p | <a href="#">EPB41L5</a>  | erythrocyte membrane protein band 4.1 like 5                |
| hsa-miR-132-3p | <a href="#">ZBTB18</a>   | zinc finger and BTB domain containing 18                    |
| hsa-miR-132-3p | <a href="#">ZFP3</a>     | ZFP3 zinc finger protein                                    |
| hsa-miR-132-3p | <a href="#">TGS1</a>     | trimethylguanosine synthase 1                               |
| hsa-miR-132-3p | <a href="#">PBOV1</a>    | prostate and breast cancer overexpressed 1                  |
| hsa-miR-132-3p | <a href="#">TMEM106B</a> | transmembrane protein 106B                                  |
| hsa-miR-132-3p | <a href="#">INAFM2</a>   | InaF motif containing 2                                     |
| hsa-miR-132-3p | <a href="#">MTMR1</a>    | myotubularin related protein 1                              |
| hsa-miR-132-3p | <a href="#">FOXA1</a>    | forkhead box A1                                             |
| hsa-miR-132-3p | <a href="#">TTK</a>      | TTK protein kinase                                          |
| hsa-miR-132-3p | <a href="#">ELOC</a>     | elongin C                                                   |
| hsa-miR-132-3p | <a href="#">HIC2</a>     | HIC ZBTB transcriptional repressor 2                        |
| hsa-miR-132-3p | <a href="#">FAM184A</a>  | family with sequence similarity 184 member A                |
| hsa-miR-132-3p | <a href="#">RFX3</a>     | regulatory factor X3                                        |
| hsa-miR-132-3p | <a href="#">FMN1</a>     | formin 1                                                    |
| hsa-miR-132-3p | <a href="#">USP9Y</a>    | ubiquitin specific peptidase 9 Y-linked                     |
| hsa-miR-132-3p | <a href="#">NDUFAF6</a>  | NADH:ubiquinone oxidoreductase complex assembly factor 6    |
| hsa-miR-132-3p | <a href="#">MAPKAP1</a>  | mitogen-activated protein kinase associated protein 1       |
| hsa-miR-132-3p | <a href="#">ISL1</a>     | ISL LIM homeobox 1                                          |
| hsa-miR-132-3p | <a href="#">CNIH1</a>    | cornichon family AMPA receptor auxiliary protein 1          |
| hsa-miR-132-3p | <a href="#">CXorf40A</a> | chromosome X open reading frame 40A                         |
| hsa-miR-132-3p | <a href="#">HYDIN</a>    | HYDIN, axonemal central pair apparatus protein              |
| hsa-miR-132-3p | <a href="#">ATP6AP1L</a> | ATPase H <sup>+</sup> transporting accessory protein 1 like |
| hsa-miR-132-3p | <a href="#">MCOLN3</a>   | mucolipin 3                                                 |
| hsa-miR-132-3p | <a href="#">PIK3R1</a>   | phosphoinositide-3-kinase regulatory subunit 1              |
| hsa-miR-132-3p | <a href="#">PPP2CB</a>   | protein phosphatase 2 catalytic subunit beta                |
| hsa-miR-132-3p | <a href="#">EPM2AIP1</a> | EPM2A interacting protein 1                                 |
| hsa-miR-132-3p | <a href="#">SMAD2</a>    | SMAD family member 2                                        |
| hsa-miR-132-3p | <a href="#">RTN4</a>     | reticulon 4                                                 |
| hsa-miR-132-3p | <a href="#">CERS2</a>    | ceramide synthase 2                                         |
| hsa-miR-132-3p | <a href="#">MISP3</a>    | MISP family member 3                                        |
| hsa-miR-132-3p | <a href="#">PNKD</a>     | PNKD, MBL domain containing                                 |
| hsa-miR-132-3p | <a href="#">DYNC1LI2</a> | dynein cytoplasmic 1 light intermediate chain 2             |
| hsa-miR-132-3p | <a href="#">HECTD1</a>   | HECT domain E3 ubiquitin protein ligase 1                   |
| hsa-miR-132-3p | <a href="#">MRM2</a>     | mitochondrial rRNA methyltransferase 2                      |

|                |                           |                                                                        |
|----------------|---------------------------|------------------------------------------------------------------------|
| hsa-miR-132-3p | <a href="#">TMEM47</a>    | transmembrane protein 47                                               |
| hsa-miR-132-3p | <a href="#">DNAJC10</a>   | DnaJ heat shock protein family (Hsp40) member C10                      |
| hsa-miR-132-3p | <a href="#">GRIP1</a>     | glutamate receptor interacting protein 1                               |
| hsa-miR-132-3p | <a href="#">ARID4B</a>    | AT-rich interaction domain 4B                                          |
| hsa-miR-132-3p | <a href="#">RPL13A</a>    | ribosomal protein L13a                                                 |
| hsa-miR-132-3p | <a href="#">APLP2</a>     | amyloid beta precursor like protein 2                                  |
| hsa-miR-132-3p | <a href="#">SEC62</a>     | SEC62 homolog, preprotein translocation factor                         |
| hsa-miR-132-3p | <a href="#">PPAT</a>      | phosphoribosyl pyrophosphate amidotransferase                          |
| hsa-miR-132-3p | <a href="#">PSMA2</a>     | proteasome subunit alpha 2                                             |
| hsa-miR-132-3p | <a href="#">ACSL4</a>     | acyl-CoA synthetase long chain family member 4                         |
| hsa-miR-132-3p | <a href="#">HAPLN1</a>    | hyaluronan and proteoglycan link protein 1                             |
| hsa-miR-132-3p | <a href="#">TRIM2</a>     | tripartite motif containing 2                                          |
| hsa-miR-132-3p | <a href="#">MINDY3</a>    | MINDY lysine 48 deubiquitinase 3                                       |
| hsa-miR-132-3p | <a href="#">SDF2</a>      | stromal cell derived factor 2                                          |
| hsa-miR-132-3p | <a href="#">SLK</a>       | STE20 like kinase                                                      |
| hsa-miR-132-3p | <a href="#">TC2N</a>      | tandem C2 domains, nuclear                                             |
| hsa-miR-132-3p | <a href="#">C9orf72</a>   | chromosome 9 open reading frame 72                                     |
| hsa-miR-132-3p | <a href="#">HAO1</a>      | hydroxyacid oxidase 1                                                  |
| hsa-miR-132-3p | <a href="#">TMEFF1</a>    | transmembrane protein with EGF like and two follistatin like domains 1 |
| hsa-miR-132-3p | <a href="#">LZTS3</a>     | leucine zipper tumor suppressor family member 3                        |
| hsa-miR-132-3p | <a href="#">BCAN</a>      | brevican                                                               |
| hsa-miR-132-3p | <a href="#">ANP32A</a>    | acidic nuclear phosphoprotein 32 family member A                       |
| hsa-miR-132-3p | <a href="#">SRP72</a>     | signal recognition particle 72                                         |
| hsa-miR-132-3p | <a href="#">ABHD5</a>     | abhydrolase domain containing 5                                        |
| hsa-miR-132-3p | <a href="#">SLBP</a>      | stem-loop binding protein                                              |
| hsa-miR-132-3p | <a href="#">KLHL11</a>    | kelch like family member 11                                            |
| hsa-miR-132-3p | <a href="#">KIAA1211L</a> | KIAA1211 like                                                          |
| hsa-miR-132-3p | <a href="#">HRNR</a>      | hornerin                                                               |
| hsa-miR-132-3p | <a href="#">C22orf39</a>  | chromosome 22 open reading frame 39                                    |
| hsa-miR-132-3p | <a href="#">ATXN7</a>     | ataxin 7                                                               |
| hsa-miR-132-3p | <a href="#">NFAT5</a>     | nuclear factor of activated T cells 5                                  |
| hsa-miR-132-3p | <a href="#">PHF20L1</a>   | PHD finger protein 20 like 1                                           |
| hsa-miR-132-3p | <a href="#">PRDM15</a>    | PR/SET domain 15                                                       |
| hsa-miR-132-3p | <a href="#">HEXB</a>      | hexosaminidase subunit beta                                            |
| hsa-miR-132-3p | <a href="#">KCNH5</a>     | potassium voltage-gated channel subfamily H member 5                   |
| hsa-miR-132-3p | <a href="#">MEX3A</a>     | mex-3 RNA binding family member A                                      |
| hsa-miR-132-3p | <a href="#">BICD2</a>     | BICD cargo adaptor 2                                                   |
| hsa-miR-132-3p | <a href="#">WDCP</a>      | WD repeat and coiled coil containing                                   |
| hsa-miR-132-3p | <a href="#">SCN1A</a>     | sodium voltage-gated channel alpha subunit 1                           |
| hsa-miR-132-3p | <a href="#">SOS1</a>      | SOS Ras/Rac guanine nucleotide exchange factor 1                       |
| hsa-miR-132-3p | <a href="#">PRPF4B</a>    | pre-mRNA processing factor 4B                                          |
| hsa-miR-132-3p | <a href="#">COL5A2</a>    | collagen type V alpha 2 chain                                          |
| hsa-miR-132-3p | <a href="#">HS2ST1</a>    | heparan sulfate 2-O-sulfotransferase 1                                 |
| hsa-miR-132-3p | <a href="#">CNTNAP3B</a>  | contactin associated protein like 3B                                   |

|                |                          |                                                                       |
|----------------|--------------------------|-----------------------------------------------------------------------|
| hsa-miR-132-3p | <a href="#">PRDM6</a>    | PR/SET domain 6                                                       |
| hsa-miR-132-3p | <a href="#">PDE7A</a>    | phosphodiesterase 7A                                                  |
| hsa-miR-132-3p | <a href="#">FANK1</a>    | fibronectin type III and ankyrin repeat domains 1                     |
| hsa-miR-132-3p | <a href="#">DENND1B</a>  | DENN domain containing 1B                                             |
| hsa-miR-132-3p | <a href="#">TMEM41B</a>  | transmembrane protein 41B                                             |
| hsa-miR-132-3p | <a href="#">CNTNAP3</a>  | contactin associated protein like 3                                   |
| hsa-miR-132-3p | <a href="#">PRKD3</a>    | protein kinase D3                                                     |
| hsa-miR-132-3p | <a href="#">MAP3K20</a>  | mitogen-activated protein kinase kinase kinase 20                     |
| hsa-miR-132-3p | <a href="#">MECP2</a>    | methyl-CpG binding protein 2                                          |
| hsa-miR-132-3p | <a href="#">ZNF236</a>   | zinc finger protein 236                                               |
| hsa-miR-132-3p | <a href="#">EPC1</a>     | enhancer of polycomb homolog 1                                        |
| hsa-miR-132-3p | <a href="#">SLC38A10</a> | solute carrier family 38 member 10                                    |
| hsa-miR-132-3p | <a href="#">PBDC1</a>    | polysaccharide biosynthesis domain containing 1                       |
| hsa-miR-132-3p | <a href="#">GNA12</a>    | G protein subunit alpha 12                                            |
| hsa-miR-132-3p | <a href="#">MFSD11</a>   | major facilitator superfamily domain containing 11                    |
| hsa-miR-132-3p | <a href="#">DNAJA2</a>   | DnaJ heat shock protein family (Hsp40) member A2                      |
| hsa-miR-132-3p | <a href="#">BCL2L11</a>  | BCL2 like 11                                                          |
| hsa-miR-132-3p | <a href="#">PPM1E</a>    | protein phosphatase, Mg <sup>2+</sup> /Mn <sup>2+</sup> dependent 1E  |
| hsa-miR-132-3p | <a href="#">EGR1</a>     | early growth response 1                                               |
| hsa-miR-132-3p | <a href="#">SOWAHA</a>   | sosondowah ankyrin repeat domain family member A                      |
| hsa-miR-132-3p | <a href="#">SFMBT1</a>   | Scm like with four mbt domains 1                                      |
| hsa-miR-132-3p | <a href="#">SLC20A1</a>  | solute carrier family 20 member 1                                     |
| hsa-miR-132-3p | <a href="#">RAD21</a>    | RAD21 cohesin complex component                                       |
| hsa-miR-132-3p | <a href="#">EIF4A2</a>   | eukaryotic translation initiation factor 4A2                          |
| hsa-miR-132-3p | <a href="#">PTAR1</a>    | protein prenyltransferase alpha subunit repeat containing 1           |
| hsa-miR-132-3p | <a href="#">SMAD5</a>    | SMAD family member 5                                                  |
| hsa-miR-132-3p | <a href="#">PAIP2</a>    | poly(A) binding protein interacting protein 2                         |
| hsa-miR-132-3p | <a href="#">NCKAP5</a>   | NCK associated protein 5                                              |
| hsa-miR-132-3p | <a href="#">TSPYL5</a>   | TSPY like 5                                                           |
| hsa-miR-132-3p | <a href="#">YIPF5</a>    | Yip1 domain family member 5                                           |
| hsa-miR-132-3p | <a href="#">TET2</a>     | tet methylcytosine dioxygenase 2                                      |
| hsa-miR-132-3p | <a href="#">RAB6B</a>    | RAB6B, member RAS oncogene family                                     |
| hsa-miR-132-3p | <a href="#">NEUROD4</a>  | neuronal differentiation 4                                            |
| hsa-miR-132-3p | <a href="#">AMOT</a>     | angiomin                                                              |
| hsa-miR-132-3p | <a href="#">OPRM1</a>    | opioid receptor mu 1                                                  |
| hsa-miR-132-3p | <a href="#">SEPHS1</a>   | selenophosphate synthetase 1                                          |
| hsa-miR-132-3p | <a href="#">CAPRIN1</a>  | cell cycle associated protein 1                                       |
| hsa-miR-132-3p | <a href="#">FBXO28</a>   | F-box protein 28                                                      |
| hsa-miR-132-3p | <a href="#">PKD1L1</a>   | polycystin 1 like 1, transient receptor potential channel interacting |
| hsa-miR-132-3p | <a href="#">SEC14L2</a>  | SEC14 like lipid binding 2                                            |
| hsa-miR-132-3p | <a href="#">RNASEH2B</a> | ribonuclease H2 subunit B                                             |
| hsa-miR-132-3p | <a href="#">KITLG</a>    | KIT ligand                                                            |
| hsa-miR-132-3p | <a href="#">UBE2D3</a>   | ubiquitin conjugating enzyme E2 D3                                    |

|                |                           |                                                        |
|----------------|---------------------------|--------------------------------------------------------|
| hsa-miR-132-3p | <a href="#">MTPN</a>      | myotrophin                                             |
| hsa-miR-132-3p | <a href="#">CENPO</a>     | centromere protein Q                                   |
| hsa-miR-132-3p | <a href="#">SEMA4G</a>    | semaphorin 4G                                          |
| hsa-miR-132-3p | <a href="#">PTGS2</a>     | prostaglandin-endoperoxide synthase 2                  |
| hsa-miR-132-3p | <a href="#">WT1</a>       | Wilms tumor 1                                          |
| hsa-miR-132-3p | <a href="#">REEP3</a>     | receptor accessory protein 3                           |
| hsa-miR-132-3p | <a href="#">SRGAP2B</a>   | SLIT-ROBO Rho GTPase activating protein 2B             |
| hsa-miR-132-3p | <a href="#">RAB28</a>     | RAB28, member RAS oncogene family                      |
| hsa-miR-132-3p | <a href="#">ATL3</a>      | atlastin GTPase 3                                      |
| hsa-miR-132-3p | <a href="#">ADCYAP1</a>   | adenylate cyclase activating polypeptide 1             |
| hsa-miR-132-3p | <a href="#">ANKRD29</a>   | ankyrin repeat domain 29                               |
| hsa-miR-132-3p | <a href="#">CTCFL</a>     | CCCTC-binding factor like                              |
| hsa-miR-132-3p | <a href="#">GABRG1</a>    | gamma-aminobutyric acid type A receptor gamma1 subunit |
| hsa-miR-132-3p | <a href="#">C18orf25</a>  | chromosome 18 open reading frame 25                    |
| hsa-miR-132-3p | <a href="#">FZD6</a>      | frizzled class receptor 6                              |
| hsa-miR-132-3p | <a href="#">GPBP1</a>     | GC-rich promoter binding protein 1                     |
| hsa-miR-132-3p | <a href="#">CCDC169</a>   | coiled-coil domain containing 169                      |
| hsa-miR-132-3p | <a href="#">MTCL1</a>     | microtubule crosslinking factor 1                      |
| hsa-miR-132-3p | <a href="#">UHMK1</a>     | U2AF homology motif kinase 1                           |
| hsa-miR-132-3p | <a href="#">ARHGAP32</a>  | Rho GTPase activating protein 32                       |
| hsa-miR-132-3p | <a href="#">ZNF644</a>    | zinc finger protein 644                                |
| hsa-miR-132-3p | <a href="#">BTBD1</a>     | BTB domain containing 1                                |
| hsa-miR-132-3p | <a href="#">UNC13A</a>    | unc-13 homolog A                                       |
| hsa-miR-132-3p | <a href="#">CLDN16</a>    | claudin 16                                             |
| hsa-miR-132-3p | <a href="#">PTPRD</a>     | protein tyrosine phosphatase, receptor type D          |
| hsa-miR-132-3p | <a href="#">ARHGEF40</a>  | Rho guanine nucleotide exchange factor 40              |
| hsa-miR-132-3p | <a href="#">BRCA1</a>     | BRCA1, DNA repair associated                           |
| hsa-miR-132-3p | <a href="#">MAN1A2</a>    | mannosidase alpha class 1A member 2                    |
| hsa-miR-132-3p | <a href="#">ARL1</a>      | ADP ribosylation factor like GTPase 1                  |
| hsa-miR-132-3p | <a href="#">APAF1</a>     | apoptotic peptidase activating factor 1                |
| hsa-miR-132-3p | <a href="#">PGR</a>       | progesterone receptor                                  |
| hsa-miR-132-3p | <a href="#">SLC1A4</a>    | solute carrier family 1 member 4                       |
| hsa-miR-132-3p | <a href="#">BBX</a>       | BBX, HMG-box containing                                |
| hsa-miR-132-3p | <a href="#">ARGFX</a>     | arginine-fifty homeobox                                |
| hsa-miR-132-3p | <a href="#">MEIS2</a>     | Meis homeobox 2                                        |
| hsa-miR-132-3p | <a href="#">HOMER1</a>    | homer scaffold protein 1                               |
| hsa-miR-132-3p | <a href="#">OLFM1</a>     | olfactomedin 1                                         |
| hsa-miR-132-3p | <a href="#">CACUL1</a>    | CDK2 associated cullin domain 1                        |
| hsa-miR-132-3p | <a href="#">SLC7A1</a>    | solute carrier family 7 member 1                       |
| hsa-miR-132-3p | <a href="#">FGF7</a>      | fibroblast growth factor 7                             |
| hsa-miR-132-3p | <a href="#">DNAJC27</a>   | DnaJ heat shock protein family (Hsp40) member C27      |
| hsa-miR-132-3p | <a href="#">FAM222B</a>   | family with sequence similarity 222 member B           |
| hsa-miR-132-3p | <a href="#">VAPA</a>      | VAMP associated protein A                              |
| hsa-miR-132-3p | <a href="#">NIPSNAP3B</a> | nipsnap homolog 3B                                     |

|                |                         |                                                                        |
|----------------|-------------------------|------------------------------------------------------------------------|
| hsa-miR-132-3p | <a href="#">MECOM</a>   | MDS1 and EVI1 complex locus                                            |
| hsa-miR-132-3p | <a href="#">POM121C</a> | POM121 transmembrane nucleoporin C                                     |
| hsa-miR-132-3p | <a href="#">VPS13A</a>  | vacuolar protein sorting 13 homolog A                                  |
| hsa-miR-132-3p | <a href="#">MX2</a>     | MX dynamin like GTPase 2                                               |
| hsa-miR-132-3p | <a href="#">ZNF133</a>  | zinc finger protein 133                                                |
| hsa-miR-132-3p | <a href="#">PIK3CA</a>  | phosphatidylinositol-4,5-bisphosphate 3-kinase catalytic subunit alpha |
| hsa-miR-132-3p | <a href="#">ADRA1A</a>  | adrenoceptor alpha 1A                                                  |
| hsa-miR-132-3p | <a href="#">IL17RD</a>  | interleukin 17 receptor D                                              |
| hsa-miR-132-3p | <a href="#">OTOGL</a>   | otogelin like                                                          |
| hsa-miR-132-3p | <a href="#">ZNF229</a>  | zinc finger protein 229                                                |
| hsa-miR-132-3p | <a href="#">HIP1R</a>   | huntingtin interacting protein 1 related                               |
| hsa-miR-132-3p | <a href="#">DCUN1D1</a> | defective in cullin neddylation 1 domain containing 1                  |
| hsa-miR-132-3p | <a href="#">TGFB1</a>   | transforming growth factor beta induced                                |
| hsa-miR-132-3p | <a href="#">NOXRED1</a> | NADP dependent oxidoreductase domain containing 1                      |
| hsa-miR-132-3p | <a href="#">SPTY2D1</a> | SPT2 chromatin protein domain containing 1                             |
| hsa-miR-132-3p | <a href="#">PLPP5</a>   | phospholipid phosphatase 5                                             |
| hsa-miR-132-3p | <a href="#">SPTSSA</a>  | serine palmitoyltransferase small subunit A                            |
| hsa-miR-132-3p | <a href="#">ZNF678</a>  | zinc finger protein 678                                                |
| hsa-miR-132-3p | <a href="#">FAM126B</a> | family with sequence similarity 126 member B                           |
| hsa-miR-132-3p | <a href="#">MMP16</a>   | matrix metalloproteinase 16                                            |
| hsa-miR-132-3p | <a href="#">EBF3</a>    | EBF transcription factor 3                                             |
| hsa-miR-132-3p | <a href="#">BARD1</a>   | BRCA1 associated RING domain 1                                         |
| hsa-miR-132-3p | <a href="#">BTAF1</a>   | B-TFIID TATA-box binding protein associated factor 1                   |
| hsa-miR-132-3p | <a href="#">EMSY</a>    | EMSY, BRCA2 interacting transcriptional repressor                      |
| hsa-miR-132-3p | <a href="#">GNB1</a>    | G protein subunit beta 1                                               |
| hsa-miR-132-3p | <a href="#">SPATS1</a>  | spermatogenesis associated serine rich 1                               |
| hsa-miR-132-3p | <a href="#">SLC31A1</a> | solute carrier family 31 member 1                                      |
| hsa-miR-132-3p | <a href="#">B4GALT6</a> | beta-1,4-galactosyltransferase 6                                       |
| hsa-miR-132-3p | <a href="#">RPGR</a>    | retinitis pigmentosa GTPase regulator                                  |
| hsa-miR-132-3p | <a href="#">PDE5A</a>   | phosphodiesterase 5A                                                   |
| hsa-miR-132-3p | <a href="#">KHDRBS2</a> | KH RNA binding domain containing, signal transduction associated 2     |
| hsa-miR-132-3p | <a href="#">KIF21B</a>  | kinesin family member 21B                                              |
| hsa-miR-132-3p | <a href="#">MANEA</a>   | mannosidase endo-alpha                                                 |
| hsa-miR-132-3p | <a href="#">BNC2</a>    | basonuclein 2                                                          |
| hsa-miR-132-3p | <a href="#">PPP2R5C</a> | protein phosphatase 2 regulatory subunit B'gamma                       |
| hsa-miR-132-3p | <a href="#">ZEB2</a>    | zinc finger E-box binding homeobox 2                                   |
| hsa-miR-132-3p | <a href="#">UBAC1</a>   | UBA domain containing 1                                                |
| hsa-miR-132-3p | <a href="#">LYN</a>     | LYN proto-oncogene, Src family tyrosine kinase                         |
| hsa-miR-132-3p | <a href="#">ERMP1</a>   | endoplasmic reticulum metalloproteinase 1                              |
| hsa-miR-132-3p | <a href="#">RC3H1</a>   | ring finger and CCCH-type domains 1                                    |
| hsa-miR-132-3p | <a href="#">ZNF507</a>  | zinc finger protein 507                                                |
| hsa-miR-132-3p | <a href="#">TGFB2</a>   | transforming growth factor beta 2                                      |
| hsa-miR-132-3p | <a href="#">DNAJB14</a> | DnaJ heat shock protein family (Hsp40) member B14                      |

|                |                          |                                                                              |
|----------------|--------------------------|------------------------------------------------------------------------------|
| hsa-miR-132-3p | <a href="#">AAK1</a>     | AP2 associated kinase 1                                                      |
| hsa-miR-132-3p | <a href="#">FXR1</a>     | FMR1 autosomal homolog 1                                                     |
| hsa-miR-132-3p | <a href="#">TUT7</a>     | terminal uridylyl transferase 7                                              |
| hsa-miR-132-3p | <a href="#">CDK14</a>    | cyclin dependent kinase 14                                                   |
| hsa-miR-132-3p | <a href="#">PFN2</a>     | profilin 2                                                                   |
| hsa-miR-132-3p | <a href="#">ZSWIM6</a>   | zinc finger SWIM-type containing 6                                           |
| hsa-miR-132-3p | <a href="#">ACAD9</a>    | acyl-CoA dehydrogenase family member 9                                       |
| hsa-miR-132-3p | <a href="#">PDE3A</a>    | phosphodiesterase 3A                                                         |
| hsa-miR-132-3p | <a href="#">GAPVD1</a>   | GTPase activating protein and VPS9 domains 1                                 |
| hsa-miR-132-3p | <a href="#">YWHAG</a>    | tyrosine 3-monooxygenase/tryptophan 5-monooxygenase activation protein gamma |
| hsa-miR-132-3p | <a href="#">FRMD6</a>    | FERM domain containing 6                                                     |
| hsa-miR-132-3p | <a href="#">BLCAP</a>    | BLCAP, apoptosis inducing factor                                             |
| hsa-miR-132-3p | <a href="#">ABHD13</a>   | abhydrolase domain containing 13                                             |
| hsa-miR-132-3p | <a href="#">RND3</a>     | Rho family GTPase 3                                                          |
| hsa-miR-132-3p | <a href="#">MTFR2</a>    | mitochondrial fission regulator 2                                            |
| hsa-miR-132-3p | <a href="#">LRRC39</a>   | leucine rich repeat containing 39                                            |
| hsa-miR-132-3p | <a href="#">ZNF362</a>   | zinc finger protein 362                                                      |
| hsa-miR-132-3p | <a href="#">KDM7A</a>    | lysine demethylase 7A                                                        |
| hsa-miR-132-3p | <a href="#">C1QL1</a>    | complement C1q like 1                                                        |
| hsa-miR-132-3p | <a href="#">PANX1</a>    | pannexin 1                                                                   |
| hsa-miR-132-3p | <a href="#">BMPRI1A</a>  | bone morphogenetic protein receptor type 1A                                  |
| hsa-miR-132-3p | <a href="#">RBMS1</a>    | RNA binding motif single stranded interacting protein 1                      |
| hsa-miR-132-3p | <a href="#">EIF2S3</a>   | eukaryotic translation initiation factor 2 subunit gamma                     |
| hsa-miR-132-3p | <a href="#">MAGI3</a>    | membrane associated guanylate kinase, WW and PDZ domain containing 3         |
| hsa-miR-132-3p | <a href="#">PLCG2</a>    | phospholipase C gamma 2                                                      |
| hsa-miR-132-3p | <a href="#">SNURF</a>    | SNRPN upstream reading frame                                                 |
| hsa-miR-132-3p | <a href="#">DYRK4</a>    | dual specificity tyrosine phosphorylation regulated kinase 4                 |
| hsa-miR-132-3p | <a href="#">NAP1L1</a>   | nucleosome assembly protein 1 like 1                                         |
| hsa-miR-132-3p | <a href="#">RPL37</a>    | ribosomal protein L37                                                        |
| hsa-miR-132-3p | <a href="#">RASSF3</a>   | Ras association domain family member 3                                       |
| hsa-miR-132-3p | <a href="#">COA5</a>     | cytochrome c oxidase assembly factor 5                                       |
| hsa-miR-132-3p | <a href="#">CDRT1</a>    | CMT1A duplicated region transcript 1                                         |
| hsa-miR-132-3p | <a href="#">RAP2B</a>    | RAP2B, member of RAS oncogene family                                         |
| hsa-miR-132-3p | <a href="#">FOXP2</a>    | forkhead box P2                                                              |
| hsa-miR-132-3p | <a href="#">SLC25A20</a> | solute carrier family 25 member 20                                           |
| hsa-miR-132-3p | <a href="#">LY75</a>     | lymphocyte antigen 75                                                        |
| hsa-miR-132-3p | <a href="#">RAD50</a>    | RAD50 double strand break repair protein                                     |
| hsa-miR-132-3p | <a href="#">MPEG1</a>    | macrophage expressed 1                                                       |
| hsa-miR-132-3p | <a href="#">TMEM68</a>   | transmembrane protein 68                                                     |
| hsa-miR-132-3p | <a href="#">MAPK3</a>    | mitogen-activated protein kinase 3                                           |
| hsa-miR-132-3p | <a href="#">SRGAP3</a>   | SLIT-ROBO Rho GTPase activating protein 3                                    |
| hsa-miR-132-3p | <a href="#">MLLT3</a>    | MLLT3, super elongation complex subunit                                      |
| hsa-miR-132-3p | <a href="#">PNISR</a>    | PNN interacting serine and arginine rich protein                             |



|                |                          |                                                         |
|----------------|--------------------------|---------------------------------------------------------|
| hsa-miR-132-3p | <a href="#">EDIL3</a>    | EGF like repeats and discoidin domains 3                |
| hsa-miR-132-3p | <a href="#">PIGG</a>     | phosphatidylinositol glycan anchor biosynthesis class G |
| hsa-miR-132-3p | <a href="#">ACTR2</a>    | ARP2 actin related protein 2 homolog                    |
| hsa-miR-132-3p | <a href="#">COMMD10</a>  | COMM domain containing 10                               |
| hsa-miR-132-3p | <a href="#">ZNF695</a>   | zinc finger protein 695                                 |
| hsa-miR-132-3p | <a href="#">TBCA</a>     | tubulin folding cofactor A                              |
| hsa-miR-132-3p | <a href="#">OTUD3</a>    | OTU deubiquitinase 3                                    |
| hsa-miR-132-3p | <a href="#">MRS2</a>     | magnesium transporter MRS2                              |
| hsa-miR-132-3p | <a href="#">PRR15L</a>   | proline rich 15 like                                    |
| hsa-miR-132-3p | <a href="#">NIPSNAP2</a> | nipsnap homolog 2                                       |
| hsa-miR-132-3p | <a href="#">PHIP</a>     | pleckstrin homology domain interacting protein          |
| hsa-miR-132-3p | <a href="#">ABCG4</a>    | ATP binding cassette subfamily G member 4               |
| hsa-miR-132-3p | <a href="#">C8A</a>      | complement C8 alpha chain                               |
| hsa-miR-132-3p | <a href="#">ZNF704</a>   | zinc finger protein 704                                 |
| hsa-miR-132-3p | <a href="#">QKI</a>      | QKI, KH domain containing RNA binding                   |
| hsa-miR-132-3p | <a href="#">RLIM</a>     | ring finger protein, LIM domain interacting             |
| hsa-miR-132-3p | <a href="#">DNAJC9</a>   | DnaJ heat shock protein family (Hsp40) member C9        |
| hsa-miR-132-3p | <a href="#">SETMAR</a>   | SET domain and mariner transposase fusion gene          |
| hsa-miR-132-3p | <a href="#">CUL4B</a>    | cullin 4B                                               |
| hsa-miR-132-3p | <a href="#">ZBTB17</a>   | zinc finger and BTB domain containing 17                |
| hsa-miR-132-3p | <a href="#">MSH2</a>     | mutS homolog 2                                          |
| hsa-miR-132-3p | <a href="#">CFL2</a>     | cofilin 2                                               |
| hsa-miR-132-3p | <a href="#">UGT2A3</a>   | UDP glucuronosyltransferase family 2 member A3          |
| hsa-miR-132-3p | <a href="#">GABRA4</a>   | gamma-aminobutyric acid type A receptor alpha4 subunit  |
| hsa-miR-132-3p | <a href="#">HIPK3</a>    | homeodomain interacting protein kinase 3                |
| hsa-miR-132-3p | <a href="#">SGCZ</a>     | sarcoglycan zeta                                        |
| hsa-miR-132-3p | <a href="#">GRIA2</a>    | glutamate ionotropic receptor AMPA type subunit 2       |
| hsa-miR-132-3p | <a href="#">INSM2</a>    | INSM transcriptional repressor 2                        |
| hsa-miR-132-3p | <a href="#">CEMIP2</a>   | cell migration inducing hyaluronidase 2                 |
| hsa-miR-132-3p | <a href="#">DGKH</a>     | diacylglycerol kinase eta                               |
| hsa-miR-132-3p | <a href="#">CYP20A1</a>  | cytochrome P450 family 20 subfamily A member 1          |
| hsa-miR-132-3p | <a href="#">NR2C2</a>    | nuclear receptor subfamily 2 group C member 2           |
| hsa-miR-132-3p | <a href="#">POU3F3</a>   | POU class 3 homeobox 3                                  |
| hsa-miR-132-3p | <a href="#">MCTS1</a>    | MCTS1, re-initiation and release factor                 |
| hsa-miR-132-3p | <a href="#">STON2</a>    | stonin 2                                                |
| hsa-miR-132-3p | <a href="#">ARHGAP21</a> | Rho GTPase activating protein 21                        |
| hsa-miR-132-3p | <a href="#">CEPT1</a>    | choline/ethanolamine phosphotransferase 1               |
| hsa-miR-132-3p | <a href="#">SHANK2</a>   | SH3 and multiple ankyrin repeat domains 2               |
| hsa-miR-132-3p | <a href="#">ELAVL4</a>   | ELAV like RNA binding protein 4                         |
| hsa-miR-132-3p | <a href="#">GPR89A</a>   | G protein-coupled receptor 89A                          |
| hsa-miR-132-3p | <a href="#">PRUNE1</a>   | prune exopolyphosphatase 1                              |
| hsa-miR-132-3p | <a href="#">TMEM51</a>   | transmembrane protein 51                                |
| hsa-miR-132-3p | <a href="#">EML4</a>     | EMAP like 4                                             |
| hsa-miR-132-3p | <a href="#">EMCN</a>     | endomucin                                               |

|                |                              |                                                               |
|----------------|------------------------------|---------------------------------------------------------------|
| hsa-miR-132-3p | <a href="#">NDRG4</a>        | NDRG family member 4                                          |
| hsa-miR-132-3p | <a href="#">NAXE</a>         | NAD(P)HX epimerase                                            |
| hsa-miR-132-3p | <a href="#">NET1</a>         | neuroepithelial cell transforming 1                           |
| hsa-miR-132-3p | <a href="#">SLC23A2</a>      | solute carrier family 23 member 2                             |
| hsa-miR-132-3p | <a href="#">MOCS3</a>        | molybdenum cofactor synthesis 3                               |
| hsa-miR-132-3p | <a href="#">L3HYPDH</a>      | trans-L-3-hydroxyproline dehydratase                          |
| hsa-miR-132-3p | <a href="#">SRGAP2</a>       | SLIT-ROBO Rho GTPase activating protein 2                     |
| hsa-miR-132-3p | <a href="#">DCBLD2</a>       | discoidin, CUB and LCCL domain containing 2                   |
| hsa-miR-132-3p | <a href="#">ZDHHC15</a>      | zinc finger DHHC-type containing 15                           |
| hsa-miR-132-3p | <a href="#">GPR89B</a>       | G protein-coupled receptor 89B                                |
| hsa-miR-132-3p | <a href="#">PRICKLE2</a>     | prickle planar cell polarity protein 2                        |
| hsa-miR-132-3p | <a href="#">ZDHHC23</a>      | zinc finger DHHC-type containing 23                           |
| hsa-miR-132-3p | <a href="#">TRMT13</a>       | tRNA methyltransferase 13 homolog                             |
| hsa-miR-132-3p | <a href="#">SPTLC2</a>       | serine palmitoyltransferase long chain base subunit 2         |
| hsa-miR-132-3p | <a href="#">LOC102723360</a> | uncharacterized LOC102723360                                  |
| hsa-miR-132-3p | <a href="#">ATF2</a>         | activating transcription factor 2                             |
| hsa-miR-132-3p | <a href="#">TAF4</a>         | TATA-box binding protein associated factor 4                  |
| hsa-miR-132-3p | <a href="#">ORC4</a>         | origin recognition complex subunit 4                          |
| hsa-miR-132-3p | <a href="#">LOC102724219</a> | uncharacterized LOC102724219                                  |
| hsa-miR-132-3p | <a href="#">SPAST</a>        | spastin                                                       |
| hsa-miR-132-3p | <a href="#">UNC13C</a>       | unc-13 homolog C                                              |
| hsa-miR-132-3p | <a href="#">BTBD7</a>        | BTB domain containing 7                                       |
| hsa-miR-132-3p | <a href="#">CHP1</a>         | calcineurin like EF-hand protein 1                            |
| hsa-miR-132-3p | <a href="#">CDC40</a>        | cell division cycle 40                                        |
| hsa-miR-132-3p | <a href="#">DDX47</a>        | DEAD-box helicase 47                                          |
| hsa-miR-132-3p | <a href="#">C11orf87</a>     | chromosome 11 open reading frame 87                           |
| hsa-miR-132-3p | <a href="#">LOC102724951</a> | uncharacterized LOC102724951                                  |
| hsa-miR-132-3p | <a href="#">LHX9</a>         | LIM homeobox 9                                                |
| hsa-miR-132-3p | <a href="#">SHOX</a>         | short stature homeobox                                        |
| hsa-miR-132-3p | <a href="#">LOC102724843</a> | uncharacterized LOC102724843                                  |
| hsa-miR-132-3p | <a href="#">LARP4</a>        | La ribonucleoprotein domain family member 4                   |
| hsa-miR-132-3p | <a href="#">PNPLA3</a>       | patatin like phospholipase domain containing 3                |
| hsa-miR-132-3p | <a href="#">AADAC</a>        | arylacetamide deacetylase                                     |
| hsa-miR-132-3p | <a href="#">ADAMTS6</a>      | ADAM metalloproteinase with thrombospondin type 1 motif 6     |
| hsa-miR-132-3p | <a href="#">TENT4B</a>       | terminal nucleotidyltransferase 4B                            |
| hsa-miR-132-3p | <a href="#">CDON</a>         | cell adhesion associated, oncogene regulated                  |
| hsa-miR-132-3p | <a href="#">ZBTB34</a>       | zinc finger and BTB domain containing 34                      |
| hsa-miR-132-3p | <a href="#">ZFX</a>          | zinc finger protein X-linked                                  |
| hsa-miR-132-3p | <a href="#">COLQ</a>         | collagen like tail subunit of asymmetric acetylcholinesterase |
| hsa-miR-132-3p | <a href="#">FBXO42</a>       | F-box protein 42                                              |
| hsa-miR-132-3p | <a href="#">LMLN</a>         | leishmanolysin like peptidase                                 |
| hsa-miR-132-3p | <a href="#">GABPB1</a>       | GA binding protein transcription factor subunit beta 1        |
| hsa-miR-132-3p | <a href="#">SLC12A6</a>      | solute carrier family 12 member 6                             |

|                |                                |                                                                        |
|----------------|--------------------------------|------------------------------------------------------------------------|
| hsa-miR-132-3p | <a href="#">MSANTD3-TMEFF1</a> | MSANTD3-TMEFF1 readthrough                                             |
| hsa-miR-132-3p | <a href="#">SEC14L5</a>        | SEC14 like lipid binding 5                                             |
| hsa-miR-132-3p | <a href="#">SUDS3</a>          | SDS3 homolog, SIN3A corepressor complex component                      |
| hsa-miR-132-3p | <a href="#">ETFBKMT</a>        | electron transfer flavoprotein subunit beta lysine methyltransferase   |
| hsa-miR-132-3p | <a href="#">CPSF6</a>          | cleavage and polyadenylation specific factor 6                         |
| hsa-miR-132-3p | <a href="#">CAPSL</a>          | calcyphosine like                                                      |
| hsa-miR-132-3p | <a href="#">SLC6A3</a>         | solute carrier family 6 member 3                                       |
| hsa-miR-132-3p | <a href="#">FAM19A2</a>        | family with sequence similarity 19 member A2, C-C motif chemokine like |
| hsa-miR-132-3p | <a href="#">FAM71F2</a>        | family with sequence similarity 71 member F2                           |
| hsa-miR-132-3p | <a href="#">CLOCK</a>          | clock circadian regulator                                              |
| hsa-miR-132-3p | <a href="#">TMEM215</a>        | transmembrane protein 215                                              |
| hsa-miR-132-3p | <a href="#">ZNF264</a>         | zinc finger protein 264                                                |
| hsa-miR-132-3p | <a href="#">DGKE</a>           | diacylglycerol kinase epsilon                                          |
| hsa-miR-132-3p | <a href="#">REL</a>            | REL proto-oncogene, NF-kB subunit                                      |
| hsa-miR-132-3p | <a href="#">SV2B</a>           | synaptic vesicle glycoprotein 2B                                       |
| hsa-miR-132-3p | <a href="#">MSTN</a>           | myostatin                                                              |
| hsa-miR-132-3p | <a href="#">FBXW2</a>          | F-box and WD repeat domain containing 2                                |
| hsa-miR-132-3p | <a href="#">FOXN3</a>          | forkhead box N3                                                        |
| hsa-miR-132-3p | <a href="#">PRKD1</a>          | protein kinase D1                                                      |
| hsa-miR-132-3p | <a href="#">GNL3L</a>          | G protein nucleolar 3 like                                             |
| hsa-miR-132-3p | <a href="#">WASHC5</a>         | WASH complex subunit 5                                                 |
| hsa-miR-132-3p | <a href="#">SETDB2</a>         | SET domain bifurcated histone lysine methyltransferase 2               |
| hsa-miR-132-3p | <a href="#">CAMTA1</a>         | calmodulin binding transcription activator 1                           |
| hsa-miR-132-3p | <a href="#">TP53AIP1</a>       | tumor protein p53 regulated apoptosis inducing protein 1               |
| hsa-miR-132-3p | <a href="#">RHOU</a>           | ras homolog family member U                                            |
| hsa-miR-132-3p | <a href="#">ZNF333</a>         | zinc finger protein 333                                                |
| hsa-miR-132-3p | <a href="#">WDR93</a>          | WD repeat domain 93                                                    |
| hsa-miR-132-3p | <a href="#">ARMC1</a>          | armadillo repeat containing 1                                          |
| hsa-miR-132-3p | <a href="#">TMEM50B</a>        | transmembrane protein 50B                                              |
| hsa-miR-132-3p | <a href="#">TMEM87A</a>        | transmembrane protein 87A                                              |
| hsa-miR-132-3p | <a href="#">GRK3</a>           | G protein-coupled receptor kinase 3                                    |
| hsa-miR-132-3p | <a href="#">DNMBP</a>          | dynamin binding protein                                                |
| hsa-miR-132-3p | <a href="#">DIPK2B</a>         | divergent protein kinase domain 2B                                     |
| hsa-miR-132-3p | <a href="#">LOC100287896</a>   | uncharacterized LOC100287896                                           |
| hsa-miR-132-3p | <a href="#">PPM1L</a>          | protein phosphatase, Mg <sup>2+</sup> /Mn <sup>2+</sup> dependent 1L   |
| hsa-miR-132-3p | <a href="#">KCNMA1</a>         | potassium calcium-activated channel subfamily M alpha 1                |
| hsa-miR-132-3p | <a href="#">SCCPDH</a>         | saccharopine dehydrogenase (putative)                                  |
| hsa-miR-132-3p | <a href="#">SNIP1</a>          | Smad nuclear interacting protein 1                                     |
| hsa-miR-132-3p | <a href="#">NEIL2</a>          | nei like DNA glycosylase 2                                             |
| hsa-miR-132-3p | <a href="#">NAB1</a>           | NGFI-A binding protein 1                                               |

|                |                          |                                                               |
|----------------|--------------------------|---------------------------------------------------------------|
| hsa-miR-132-3p | <a href="#">BTRC</a>     | beta-transducin repeat containing E3 ubiquitin protein ligase |
| hsa-miR-132-3p | <a href="#">CC2D2A</a>   | coiled-coil and C2 domain containing 2A                       |
| hsa-miR-132-3p | <a href="#">AFF4</a>     | AF4/FMR2 family member 4                                      |
| hsa-miR-132-3p | <a href="#">GRSF1</a>    | G-rich RNA sequence binding factor 1                          |
| hsa-miR-132-3p | <a href="#">EDN1</a>     | endothelin 1                                                  |
| hsa-miR-132-3p | <a href="#">WTAP</a>     | WT1 associated protein                                        |
| hsa-miR-132-3p | <a href="#">KLRG1</a>    | killer cell lectin like receptor G1                           |
| hsa-miR-132-3p | <a href="#">RIT1</a>     | Ras like without CAAX 1                                       |
| hsa-miR-132-3p | <a href="#">KCNS1</a>    | potassium voltage-gated channel modifier subfamily S member 1 |
| hsa-miR-132-3p | <a href="#">POLR1A</a>   | RNA polymerase I subunit A                                    |
| hsa-miR-132-3p | <a href="#">NUCKS1</a>   | nuclear casein kinase and cyclin dependent kinase substrate 1 |
| hsa-miR-132-3p | <a href="#">ZNF90</a>    | zinc finger protein 90                                        |
| hsa-miR-132-3p | <a href="#">ELOVL2</a>   | ELOVL fatty acid elongase 2                                   |
| hsa-miR-132-3p | <a href="#">PIK3IP1</a>  | phosphoinositide-3-kinase interacting protein 1               |
| hsa-miR-132-3p | <a href="#">ACHE</a>     | acetylcholinesterase (Cartwright blood group)                 |
| hsa-miR-132-3p | <a href="#">PTPN4</a>    | protein tyrosine phosphatase, non-receptor type 4             |
| hsa-miR-132-3p | <a href="#">ESYT2</a>    | extended synaptotagmin 2                                      |
| hsa-miR-132-3p | <a href="#">TSHZ2</a>    | teashirt zinc finger homeobox 2                               |
| hsa-miR-132-3p | <a href="#">C19orf47</a> | chromosome 19 open reading frame 47                           |
| hsa-miR-132-3p | <a href="#">EXOC2</a>    | exocyst complex component 2                                   |
| hsa-miR-132-3p | <a href="#">PRR5L</a>    | proline rich 5 like                                           |
| hsa-miR-132-3p | <a href="#">CLVS2</a>    | clavesin 2                                                    |
| hsa-miR-132-3p | <a href="#">TRIB2</a>    | tribbles pseudokinase 2                                       |
| hsa-miR-132-3p | <a href="#">SLC10A4</a>  | solute carrier family 10 member 4                             |
| hsa-miR-132-3p | <a href="#">PNN</a>      | pinin, desmosome associated protein                           |
| hsa-miR-132-3p | <a href="#">MEF2C</a>    | myocyte enhancer factor 2C                                    |
| hsa-miR-132-3p | <a href="#">sept-11</a>  | septin 11                                                     |
| hsa-miR-132-3p | <a href="#">CST3</a>     | cystatin C                                                    |
| hsa-miR-132-3p | <a href="#">MAPK8</a>    | mitogen-activated protein kinase 8                            |
| hsa-miR-132-3p | <a href="#">WWOX</a>     | WW domain containing oxidoreductase                           |
| hsa-miR-132-3p | <a href="#">CSNK1G3</a>  | casein kinase 1 gamma 3                                       |
| hsa-miR-132-3p | <a href="#">BNIP2</a>    | BCL2 interacting protein 2                                    |
| hsa-miR-132-3p | <a href="#">ARID1A</a>   | AT-rich interaction domain 1A                                 |
| hsa-miR-132-3p | <a href="#">ZNF287</a>   | zinc finger protein 287                                       |
| hsa-miR-132-3p | <a href="#">C5orf51</a>  | chromosome 5 open reading frame 51                            |
| hsa-miR-132-3p | <a href="#">RRP7A</a>    | ribosomal RNA processing 7 homolog A                          |
| hsa-miR-132-3p | <a href="#">TPGS2</a>    | tubulin polyglutamylase complex subunit 2                     |
| hsa-miR-132-3p | <a href="#">CRTCL</a>    | CREB regulated transcription coactivator 1                    |
| hsa-miR-132-3p | <a href="#">ZNF280C</a>  | zinc finger protein 280C                                      |
| hsa-miR-132-3p | <a href="#">CDK6</a>     | cyclin dependent kinase 6                                     |
| hsa-miR-132-3p | <a href="#">TADA2B</a>   | transcriptional adaptor 2B                                    |
| hsa-miR-132-3p | <a href="#">ATP6V1H</a>  | ATPase H+ transporting V1 subunit H                           |
| hsa-miR-132-3p | <a href="#">DOCK4</a>    | dedicator of cytokinesis 4                                    |

|                |                             |                                                               |
|----------------|-----------------------------|---------------------------------------------------------------|
| hsa-miR-132-3p | <a href="#">KMT5B</a>       | lysine methyltransferase 5B                                   |
| hsa-miR-132-3p | <a href="#">VWA3B</a>       | von Willebrand factor A domain containing 3B                  |
| hsa-miR-132-3p | <a href="#">TTC14</a>       | tetratricopeptide repeat domain 14                            |
| hsa-miR-132-3p | <a href="#">MARCH6</a>      | membrane associated ring-CH-type finger 6                     |
| hsa-miR-132-3p | <a href="#">ZFY</a>         | zinc finger protein Y-linked                                  |
| hsa-miR-132-3p | <a href="#">TMEM59</a>      | transmembrane protein 59                                      |
| hsa-miR-132-3p | <a href="#">TCF7L1</a>      | transcription factor 7 like 1                                 |
| hsa-miR-132-3p | <a href="#">PHKB</a>        | phosphorylase kinase regulatory subunit beta                  |
| hsa-miR-132-3p | <a href="#">DCAF10</a>      | DDB1 and CUL4 associated factor 10                            |
| hsa-miR-132-3p | <a href="#">CCDC189</a>     | coiled-coil domain containing 189                             |
| hsa-miR-132-3p | <a href="#">ALKBH8</a>      | alkB homolog 8, tRNA methyltransferase                        |
| hsa-miR-132-3p | <a href="#">ZBTB5</a>       | zinc finger and BTB domain containing 5                       |
| hsa-miR-132-3p | <a href="#">MEGF11</a>      | multiple EGF like domains 11                                  |
| hsa-miR-132-3p | <a href="#">SEPSECS</a>     | Sep (O-phosphoserine) tRNA:Sec (selenocysteine) tRNA synthase |
| hsa-miR-132-3p | <a href="#">ABR</a>         | ABR, RhoGEF and GTPase activating protein                     |
| hsa-miR-132-3p | <a href="#">SREBF1</a>      | sterol regulatory element binding transcription factor 1      |
| hsa-miR-132-3p | <a href="#">SEMA4A</a>      | semaphorin 4A                                                 |
| hsa-miR-132-3p | <a href="#">GRM4</a>        | glutamate metabotropic receptor 4                             |
| hsa-miR-132-3p | <a href="#">ZWINT</a>       | ZW10 interacting kinetochore protein                          |
| hsa-miR-132-3p | <a href="#">REPS2</a>       | RALBP1 associated Eps domain containing 2                     |
| hsa-miR-132-3p | <a href="#">ZNF248</a>      | zinc finger protein 248                                       |
| hsa-miR-132-3p | <a href="#">UNC80</a>       | unc-80 homolog, NALCN channel complex subunit                 |
| hsa-miR-132-3p | <a href="#">ITCH</a>        | itchy E3 ubiquitin protein ligase                             |
| hsa-miR-132-3p | <a href="#">ZMAT3</a>       | zinc finger matrin-type 3                                     |
| hsa-miR-132-3p | <a href="#">SLC30A10</a>    | solute carrier family 30 member 10                            |
| hsa-miR-132-3p | <a href="#">DIME1</a>       | DIME1 dimethyladenosine transferase 1 homolog                 |
| hsa-miR-132-3p | <a href="#">UBR3</a>        | ubiquitin protein ligase E3 component n-recognin 3            |
| hsa-miR-132-3p | <a href="#">ACP1</a>        | acid phosphatase 1                                            |
| hsa-miR-132-3p | <a href="#">ZNF696</a>      | zinc finger protein 696                                       |
| hsa-miR-132-3p | <a href="#">ENTPD1</a>      | ectonucleoside triphosphate diphosphohydrolase 1              |
| hsa-miR-132-3p | <a href="#">FABP2</a>       | fatty acid binding protein 2                                  |
| hsa-miR-132-3p | <a href="#">BRAP</a>        | BRCA1 associated protein                                      |
| hsa-miR-132-3p | <a href="#">TFDP1</a>       | transcription factor Dp-1                                     |
| hsa-miR-132-3p | <a href="#">ABCG1</a>       | ATP binding cassette subfamily G member 1                     |
| hsa-miR-132-3p | <a href="#">EDNRA</a>       | endothelin receptor type A                                    |
| hsa-miR-132-3p | <a href="#">TPRG1</a>       | tumor protein p63 regulated 1                                 |
| hsa-miR-132-3p | <a href="#">MDFIC</a>       | MyoD family inhibitor domain containing                       |
| hsa-miR-132-3p | <a href="#">PSD3</a>        | pleckstrin and Sec7 domain containing 3                       |
| hsa-miR-132-3p | <a href="#">HECTD2</a>      | HECT domain E3 ubiquitin protein ligase 2                     |
| hsa-miR-132-3p | <a href="#">SH3TC2</a>      | SH3 domain and tetratricopeptide repeats 2                    |
| hsa-miR-132-3p | <a href="#">PLXND1</a>      | plexin D1                                                     |
| hsa-miR-132-3p | <a href="#">NABP1</a>       | nucleic acid binding protein 1                                |
| hsa-miR-132-3p | <a href="#">GUCY1A1</a>     | guanylate cyclase 1 soluble subunit alpha 1                   |
| hsa-miR-132-3p | <a href="#">KLRC4-KLRK1</a> | KLRC4-KLRK1 readthrough                                       |

|                 |                          |                                                                              |
|-----------------|--------------------------|------------------------------------------------------------------------------|
| hsa-miR-132-3p  | <a href="#">ZNF280D</a>  | zinc finger protein 280D                                                     |
| hsa-miR-132-3p  | <a href="#">TRIP12</a>   | thyroid hormone receptor interactor 12                                       |
| hsa-miR-132-3p  | <a href="#">APC</a>      | APC, WNT signaling pathway regulator                                         |
| hsa-miR-132-3p  | <a href="#">KLRK1</a>    | killer cell lectin like receptor K1                                          |
| hsa-miR-132-3p  | <a href="#">SUCNR1</a>   | succinate receptor 1                                                         |
| hsa-miR-132-3p  | <a href="#">NOM1</a>     | nucleolar protein with MIF4G domain 1                                        |
| hsa-miR-132-3p  | <a href="#">FRK</a>      | fyn related Src family tyrosine kinase                                       |
| hsa-miR-132-3p  | <a href="#">FZD1</a>     | frizzled class receptor 1                                                    |
| hsa-miR-132-3p  | <a href="#">NKTR</a>     | natural killer cell triggering receptor                                      |
| hsa-miR-132-3p  | <a href="#">CASD1</a>    | CAS1 domain containing 1                                                     |
| hsa-miR-132-3p  | <a href="#">CFAP206</a>  | cilia and flagella associated protein 206                                    |
| hsa-miR-132-3p  | <a href="#">USP44</a>    | ubiquitin specific peptidase 44                                              |
| hsa-miR-132-3p  | <a href="#">VPS41</a>    | VPS41, HOPS complex subunit                                                  |
| hsa-miR-132-3p  | <a href="#">EHF</a>      | ETS homologous factor                                                        |
| hsa-miR-132-3p  | <a href="#">CNOT2</a>    | CCR4-NOT transcription complex subunit 2                                     |
| hsa-miR-132-3p  | <a href="#">GLIPR1</a>   | GLI pathogenesis related 1                                                   |
| hsa-miR-132-3p  | <a href="#">DACH1</a>    | dachshund family transcription factor 1                                      |
| hsa-miR-200b-3p | <a href="#">VASH2</a>    | vasohibin 2                                                                  |
| hsa-miR-200b-3p | <a href="#">HIPK3</a>    | homeodomain interacting protein kinase 3                                     |
| hsa-miR-200b-3p | <a href="#">MAP2</a>     | microtubule associated protein 2                                             |
| hsa-miR-200b-3p | <a href="#">ERRFI1</a>   | ERBB receptor feedback inhibitor 1                                           |
| hsa-miR-200b-3p | <a href="#">ZEB1</a>     | zinc finger E-box binding homeobox 1                                         |
| hsa-miR-200b-3p | <a href="#">NR5A2</a>    | nuclear receptor subfamily 5 group A member 2                                |
| hsa-miR-200b-3p | <a href="#">ZEB2</a>     | zinc finger E-box binding homeobox 2                                         |
| hsa-miR-200b-3p | <a href="#">RECK</a>     | reversion inducing cysteine rich protein with kazal motifs                   |
| hsa-miR-200b-3p | <a href="#">SLIT2</a>    | slit guidance ligand 2                                                       |
| hsa-miR-200b-3p | <a href="#">WIPF1</a>    | WAS/WASL interacting protein family member 1                                 |
| hsa-miR-200b-3p | <a href="#">C11orf95</a> | chromosome 11 open reading frame 95                                          |
| hsa-miR-200b-3p | <a href="#">FAM8A1</a>   | family with sequence similarity 8 member A1                                  |
| hsa-miR-200b-3p | <a href="#">LHFPL6</a>   | LHFPL tetraspan subfamily member 6                                           |
| hsa-miR-200b-3p | <a href="#">AP1S2</a>    | adaptor related protein complex 1 subunit sigma 2                            |
| hsa-miR-200b-3p | <a href="#">SEC23A</a>   | Sec23 homolog A, coat complex II component                                   |
| hsa-miR-200b-3p | <a href="#">TBX18</a>    | T-box 18                                                                     |
| hsa-miR-200b-3p | <a href="#">PTPN21</a>   | protein tyrosine phosphatase, non-receptor type 21                           |
| hsa-miR-200b-3p | <a href="#">DNAIC3</a>   | DnaJ heat shock protein family (Hsp40) member C3                             |
| hsa-miR-200b-3p | <a href="#">QKI</a>      | QKI, KH domain containing RNA binding                                        |
| hsa-miR-200b-3p | <a href="#">RIC1</a>     | RIC1 homolog, RAB6A GEF complex partner 1                                    |
| hsa-miR-200b-3p | <a href="#">CCNI</a>     | cyclin J                                                                     |
| hsa-miR-200b-3p | <a href="#">PCMTD1</a>   | protein-L-isoaspartate (D-aspartate) O-methyltransferase domain containing 1 |
| hsa-miR-200b-3p | <a href="#">CFL2</a>     | cofilin 2                                                                    |
| hsa-miR-200b-3p | <a href="#">GPM6A</a>    | glycoprotein M6A                                                             |
| hsa-miR-200b-3p | <a href="#">ARHGAP6</a>  | Rho GTPase activating protein 6                                              |
| hsa-miR-200b-3p | <a href="#">TFAP2A</a>   | transcription factor AP-2 alpha                                              |
| hsa-miR-200b-3p | <a href="#">SLC35B4</a>  | solute carrier family 35 member B4                                           |



|                 |                           |                                                                             |
|-----------------|---------------------------|-----------------------------------------------------------------------------|
| hsa-miR-200b-3p | <a href="#">BAP1</a>      | BRCA1 associated protein 1                                                  |
| hsa-miR-200b-3p | <a href="#">RAB11FIP2</a> | RAB11 family interacting protein 2                                          |
| hsa-miR-200b-3p | <a href="#">MSN</a>       | moesin                                                                      |
| hsa-miR-200b-3p | <a href="#">FBXW7</a>     | F-box and WD repeat domain containing 7                                     |
| hsa-miR-200b-3p | <a href="#">TRIM33</a>    | tripartite motif containing 33                                              |
| hsa-miR-200b-3p | <a href="#">CNOT6</a>     | CCR4-NOT transcription complex subunit 6                                    |
| hsa-miR-200b-3p | <a href="#">PRTG</a>      | protogenin                                                                  |
| hsa-miR-200b-3p | <a href="#">RPS6KB1</a>   | ribosomal protein S6 kinase B1                                              |
| hsa-miR-200b-3p | <a href="#">WASF3</a>     | WAS protein family member 3                                                 |
| hsa-miR-200b-3p | <a href="#">KDM7A</a>     | lysine demethylase 7A                                                       |
| hsa-miR-200b-3p | <a href="#">ELL2</a>      | elongation factor for RNA polymerase II 2                                   |
| hsa-miR-200b-3p | <a href="#">ATXN1</a>     | ataxin 1                                                                    |
| hsa-miR-200b-3p | <a href="#">SYNJ1</a>     | synaptojanin 1                                                              |
| hsa-miR-200b-3p | <a href="#">MIEF1</a>     | mitochondrial elongation factor 1                                           |
| hsa-miR-200b-3p | <a href="#">MBNL3</a>     | muscleblind like splicing regulator 3                                       |
| hsa-miR-200b-3p | <a href="#">CSNK1G3</a>   | casein kinase 1 gamma 3                                                     |
| hsa-miR-200b-3p | <a href="#">KHDRBS1</a>   | KH RNA binding domain containing, signal transduction associated 1          |
| hsa-miR-200b-3p | <a href="#">ELMOD2</a>    | ELMO domain containing 2                                                    |
| hsa-miR-200b-3p | <a href="#">MCFD2</a>     | multiple coagulation factor deficiency 2                                    |
| hsa-miR-200b-3p | <a href="#">CRKL</a>      | CRK like proto-oncogene, adaptor protein                                    |
| hsa-miR-200b-3p | <a href="#">TENT4B</a>    | terminal nucleotidyltransferase 4B                                          |
| hsa-miR-200b-3p | <a href="#">MPRIIP</a>    | myosin phosphatase Rho interacting protein                                  |
| hsa-miR-200b-3p | <a href="#">PPP4R2</a>    | protein phosphatase 4 regulatory subunit 2                                  |
| hsa-miR-200b-3p | <a href="#">MGAT2</a>     | mannosyl (alpha-1,6-)-glycoprotein beta-1,2-N-acetylglucosaminyltransferase |
| hsa-miR-200b-3p | <a href="#">FAM122C</a>   | family with sequence similarity 122C                                        |
| hsa-miR-200b-3p | <a href="#">NFIA</a>      | nuclear factor I A                                                          |
| hsa-miR-200b-3p | <a href="#">NOVA2</a>     | NOVA alternative splicing regulator 2                                       |
| hsa-miR-200b-3p | <a href="#">SUSD5</a>     | sushi domain containing 5                                                   |
| hsa-miR-200b-3p | <a href="#">FEZ2</a>      | fasciculation and elongation protein zeta 2                                 |
| hsa-miR-200b-3p | <a href="#">PRDM16</a>    | PR/SET domain 16                                                            |
| hsa-miR-200b-3p | <a href="#">LRP1B</a>     | LDL receptor related protein 1B                                             |
| hsa-miR-200b-3p | <a href="#">PPP2R5E</a>   | protein phosphatase 2 regulatory subunit B'epsilon                          |
| hsa-miR-200b-3p | <a href="#">PTPN14</a>    | protein tyrosine phosphatase, non-receptor type 14                          |
| hsa-miR-200b-3p | <a href="#">OSTM1</a>     | osteoclastogenesis associated transmembrane protein 1                       |
| hsa-miR-200b-3p | <a href="#">FAM126B</a>   | family with sequence similarity 126 member B                                |
| hsa-miR-200b-3p | <a href="#">CDK17</a>     | cyclin dependent kinase 17                                                  |
| hsa-miR-200b-3p | <a href="#">FRMD6</a>     | FERM domain containing 6                                                    |
| hsa-miR-200b-3p | <a href="#">RBSN</a>      | rabenosyn, RAB effector                                                     |
| hsa-miR-200b-3p | <a href="#">JAKMIP2</a>   | janus kinase and microtubule interacting protein 2                          |
| hsa-miR-200b-3p | <a href="#">PIK3CA</a>    | phosphatidylinositol-4,5-bisphosphate 3-kinase catalytic subunit alpha      |
| hsa-miR-200b-3p | <a href="#">CCDC177</a>   | coiled-coil domain containing 177                                           |
| hsa-miR-200b-3p | <a href="#">ARIH1</a>     | ariadne RBR E3 ubiquitin protein ligase 1                                   |
| hsa-miR-200b-3p | <a href="#">ATP11C</a>    | ATPase phospholipid transporting 11C                                        |

|                 |                          |                                                                      |
|-----------------|--------------------------|----------------------------------------------------------------------|
| hsa-miR-200b-3p | <a href="#">RTF1</a>     | RTF1 homolog, Paf1/RNA polymerase II complex component               |
| hsa-miR-200b-3p | <a href="#">PPM1F</a>    | protein phosphatase, Mg <sup>2+</sup> /Mn <sup>2+</sup> dependent 1F |
| hsa-miR-200b-3p | <a href="#">RAP2C</a>    | RAP2C, member of RAS oncogene family                                 |
| hsa-miR-200b-3p | <a href="#">MMD</a>      | monocyte to macrophage differentiation associated                    |
| hsa-miR-200b-3p | <a href="#">CHN2</a>     | chimerin 2                                                           |
| hsa-miR-200b-3p | <a href="#">PHF21B</a>   | PHD finger protein 21B                                               |
| hsa-miR-200b-3p | <a href="#">SULF1</a>    | sulfatase 1                                                          |
| hsa-miR-200b-3p | <a href="#">ARL2BP</a>   | ADP ribosylation factor like GTPase 2 binding protein                |
| hsa-miR-200b-3p | <a href="#">ADIPOR2</a>  | adiponectin receptor 2                                               |
| hsa-miR-200b-3p | <a href="#">ZNF532</a>   | zinc finger protein 532                                              |
| hsa-miR-200b-3p | <a href="#">PHACTR3</a>  | phosphatase and actin regulator 3                                    |
| hsa-miR-200b-3p | <a href="#">RASA2</a>    | RAS p21 protein activator 2                                          |
| hsa-miR-200b-3p | <a href="#">ZNF711</a>   | zinc finger protein 711                                              |
| hsa-miR-200b-3p | <a href="#">SEMA6D</a>   | semaphorin 6D                                                        |
| hsa-miR-200b-3p | <a href="#">VLDLR</a>    | very low density lipoprotein receptor                                |
| hsa-miR-200b-3p | <a href="#">IGSF10</a>   | immunoglobulin superfamily member 10                                 |
| hsa-miR-200b-3p | <a href="#">WNT16</a>    | Wnt family member 16                                                 |
| hsa-miR-200b-3p | <a href="#">CBL</a>      | Cbl proto-oncogene                                                   |
| hsa-miR-200b-3p | <a href="#">EPS8</a>     | epidermal growth factor receptor pathway substrate 8                 |
| hsa-miR-200b-3p | <a href="#">NANOS1</a>   | nanos C2HC-type zinc finger 1                                        |
| hsa-miR-200b-3p | <a href="#">TMOD3</a>    | tropomodulin 3                                                       |
| hsa-miR-200b-3p | <a href="#">SGIP1</a>    | SH3 domain GRB2 like endophilin interacting protein 1                |
| hsa-miR-200b-3p | <a href="#">COL4A3BP</a> | collagen type IV alpha 3 binding protein                             |
| hsa-miR-200b-3p | <a href="#">KDELCL1</a>  | KDEL motif containing 1                                              |
| hsa-miR-200b-3p | <a href="#">MINDY2</a>   | MINDY lysine 48 deubiquitinase 2                                     |
| hsa-miR-200b-3p | <a href="#">RND3</a>     | Rho family GTPase 3                                                  |
| hsa-miR-200b-3p | <a href="#">KDR</a>      | kinase insert domain receptor                                        |
| hsa-miR-200b-3p | <a href="#">OTUD4</a>    | OTU deubiquitinase 4                                                 |
| hsa-miR-200b-3p | <a href="#">NCOA2</a>    | nuclear receptor coactivator 2                                       |
| hsa-miR-200b-3p | <a href="#">HMBOX1</a>   | homeobox containing 1                                                |
| hsa-miR-200b-3p | <a href="#">DUSP1</a>    | dual specificity phosphatase 1                                       |
| hsa-miR-200b-3p | <a href="#">ELOC</a>     | elongin C                                                            |
| hsa-miR-200b-3p | <a href="#">C16orf72</a> | chromosome 16 open reading frame 72                                  |
| hsa-miR-200b-3p | <a href="#">EGLN1</a>    | egl-9 family hypoxia inducible factor 1                              |
| hsa-miR-200b-3p | <a href="#">CLASP1</a>   | cytoplasmic linker associated protein 1                              |
| hsa-miR-200b-3p | <a href="#">ZFAND6</a>   | zinc finger AN1-type containing 6                                    |
| hsa-miR-200b-3p | <a href="#">FOXG1</a>    | forkhead box G1                                                      |
| hsa-miR-200b-3p | <a href="#">KCNQ3</a>    | potassium voltage-gated channel subfamily Q member 3                 |
| hsa-miR-200b-3p | <a href="#">MBOAT2</a>   | membrane bound O-acyltransferase domain containing 2                 |
| hsa-miR-200b-3p | <a href="#">PHTF2</a>    | putative homeodomain transcription factor 2                          |
| hsa-miR-200b-3p | <a href="#">BRWD3</a>    | bromodomain and WD repeat domain containing 3                        |
| hsa-miR-200b-3p | <a href="#">NBR1</a>     | NBR1, autophagy cargo receptor                                       |
| hsa-miR-200b-3p | <a href="#">ZNF131</a>   | zinc finger protein 131                                              |
| hsa-miR-200b-3p | <a href="#">AFF3</a>     | AF4/FMR2 family member 3                                             |

|                 |                                |                                                               |
|-----------------|--------------------------------|---------------------------------------------------------------|
| hsa-miR-200b-3p | <a href="#">ARL5A</a>          | ADP ribosylation factor like GTPase 5A                        |
| hsa-miR-200b-3p | <a href="#">TMX4</a>           | thioredoxin related transmembrane protein 4                   |
| hsa-miR-200b-3p | <a href="#">IMMP2L</a>         | inner mitochondrial membrane peptidase subunit 2              |
| hsa-miR-200b-3p | <a href="#">MAP3K1</a>         | mitogen-activated protein kinase kinase kinase 1              |
| hsa-miR-200b-3p | <a href="#">IPO7</a>           | importin 7                                                    |
| hsa-miR-200b-3p | <a href="#">GOLGA7</a>         | golgin A7                                                     |
| hsa-miR-200b-3p | <a href="#">DLC1</a>           | DLC1 Rho GTPase activating protein                            |
| hsa-miR-200b-3p | <a href="#">XKR8</a>           | XK related 8                                                  |
| hsa-miR-200b-3p | <a href="#">ELK4</a>           | ELK4, ETS transcription factor                                |
| hsa-miR-200b-3p | <a href="#">FN1</a>            | fibronectin 1                                                 |
| hsa-miR-200b-3p | <a href="#">SESN1</a>          | sestrin 1                                                     |
| hsa-miR-200b-3p | <a href="#">JUN</a>            | Jun proto-oncogene, AP-1 transcription factor subunit         |
| hsa-miR-200b-3p | <a href="#">GPR158</a>         | G protein-coupled receptor 158                                |
| hsa-miR-200b-3p | <a href="#">DGKH</a>           | diacylglycerol kinase eta                                     |
| hsa-miR-200b-3p | <a href="#">SYDE1</a>          | synapse defective Rho GTPase homolog 1                        |
| hsa-miR-200b-3p | <a href="#">PPHLN1</a>         | periphilin 1                                                  |
| hsa-miR-200b-3p | <a href="#">ZC3H6</a>          | zinc finger CCCH-type containing 6                            |
| hsa-miR-200b-3p | <a href="#">PRKG1</a>          | protein kinase cGMP-dependent 1                               |
| hsa-miR-200b-3p | <a href="#">SLC1A2</a>         | solute carrier family 1 member 2                              |
| hsa-miR-200b-3p | <a href="#">RANBP9</a>         | RAN binding protein 9                                         |
| hsa-miR-200b-3p | <a href="#">GOLGA1</a>         | golgin A1                                                     |
| hsa-miR-200b-3p | <a href="#">LOX</a>            | lysyl oxidase                                                 |
| hsa-miR-200b-3p | <a href="#">GIT2</a>           | GIT ArfGAP 2                                                  |
| hsa-miR-200b-3p | <a href="#">ARMCX5-GPRASP2</a> | ARMCX5-GPRASP2 readthrough                                    |
| hsa-miR-200b-3p | <a href="#">MPDZ</a>           | multiple PDZ domain crumbs cell polarity complex component    |
| hsa-miR-200b-3p | <a href="#">PGM2L1</a>         | phosphoglucomutase 2 like 1                                   |
| hsa-miR-200b-3p | <a href="#">PRKACB</a>         | protein kinase cAMP-activated catalytic subunit beta          |
| hsa-miR-200b-3p | <a href="#">CDH20</a>          | cadherin 20                                                   |
| hsa-miR-200b-3p | <a href="#">NTF3</a>           | neurotrophin 3                                                |
| hsa-miR-200b-3p | <a href="#">B3GNT2</a>         | UDP-GlcNAc:betaGal beta-1,3-N-acetylglucosaminyltransferase 2 |
| hsa-miR-200b-3p | <a href="#">PSAT1</a>          | phosphoserine aminotransferase 1                              |
| hsa-miR-200b-3p | <a href="#">REEP1</a>          | receptor accessory protein 1                                  |
| hsa-miR-200b-3p | <a href="#">MED13</a>          | mediator complex subunit 13                                   |
| hsa-miR-200b-3p | <a href="#">TBK1</a>           | TANK binding kinase 1                                         |
| hsa-miR-200b-3p | <a href="#">TBC1D12</a>        | TBC1 domain family member 12                                  |
| hsa-miR-200b-3p | <a href="#">MAPK7</a>          | mitogen-activated protein kinase 7                            |
| hsa-miR-200b-3p | <a href="#">WAPL</a>           | WAPL cohesin release factor                                   |
| hsa-miR-200b-3p | <a href="#">VEGFA</a>          | vascular endothelial growth factor A                          |
| hsa-miR-200b-3p | <a href="#">RUSC2</a>          | RUN and SH3 domain containing 2                               |
| hsa-miR-200b-3p | <a href="#">SFXN1</a>          | sideroflexin 1                                                |
| hsa-miR-200b-3p | <a href="#">ZFX</a>            | zinc finger protein X-linked                                  |
| hsa-miR-200b-3p | <a href="#">HS2ST1</a>         | heparan sulfate 2-O-sulfotransferase 1                        |

|                 |                          |                                                                      |
|-----------------|--------------------------|----------------------------------------------------------------------|
| hsa-miR-200b-3p | <a href="#">BLCAP</a>    | BLCAP, apoptosis inducing factor                                     |
| hsa-miR-200b-3p | <a href="#">RAB21</a>    | RAB21, member RAS oncogene family                                    |
| hsa-miR-200b-3p | <a href="#">GPRASP2</a>  | G protein-coupled receptor associated sorting protein 2              |
| hsa-miR-200b-3p | <a href="#">DESI1</a>    | desumoylating isopeptidase 1                                         |
| hsa-miR-200b-3p | <a href="#">FOXF1</a>    | forkhead box F1                                                      |
| hsa-miR-200b-3p | <a href="#">PTPRZ1</a>   | protein tyrosine phosphatase, receptor type Z1                       |
| hsa-miR-200b-3p | <a href="#">TMEM17</a>   | transmembrane protein 17                                             |
| hsa-miR-200b-3p | <a href="#">FSCN1</a>    | fascin actin-bundling protein 1                                      |
| hsa-miR-200b-3p | <a href="#">PPP1R18</a>  | protein phosphatase 1 regulatory subunit 18                          |
| hsa-miR-200b-3p | <a href="#">RNF2</a>     | ring finger protein 2                                                |
| hsa-miR-200b-3p | <a href="#">THAP1</a>    | THAP domain containing 1                                             |
| hsa-miR-200b-3p | <a href="#">CLIC4</a>    | chloride intracellular channel 4                                     |
| hsa-miR-200b-3p | <a href="#">CECR2</a>    | CECR2, histone acetyl-lysine reader                                  |
| hsa-miR-200b-3p | <a href="#">HOOK1</a>    | hook microtubule tethering protein 1                                 |
| hsa-miR-200b-3p | <a href="#">PPM1E</a>    | protein phosphatase, Mg <sup>2+</sup> /Mn <sup>2+</sup> dependent 1E |
| hsa-miR-200b-3p | <a href="#">CHRD1</a>    | chordin like 1                                                       |
| hsa-miR-200b-3p | <a href="#">DTNA</a>     | dystrobrevin alpha                                                   |
| hsa-miR-200b-3p | <a href="#">ZBTB10</a>   | zinc finger and BTB domain containing 10                             |
| hsa-miR-200b-3p | <a href="#">B3GLCT</a>   | beta 3-glucosyltransferase                                           |
| hsa-miR-200b-3p | <a href="#">DNAJB9</a>   | DnaJ heat shock protein family (Hsp40) member B9                     |
| hsa-miR-200b-3p | <a href="#">FAT3</a>     | FAT atypical cadherin 3                                              |
| hsa-miR-200b-3p | <a href="#">NR3C1</a>    | nuclear receptor subfamily 3 group C member 1                        |
| hsa-miR-200b-3p | <a href="#">FAM227B</a>  | family with sequence similarity 227 member B                         |
| hsa-miR-200b-3p | <a href="#">CSMD3</a>    | CUB and Sushi multiple domains 3                                     |
| hsa-miR-200b-3p | <a href="#">PPFIA1</a>   | PTPRF interacting protein alpha 1                                    |
| hsa-miR-200b-3p | <a href="#">KCTD8</a>    | potassium channel tetramerization domain containing 8                |
| hsa-miR-200b-3p | <a href="#">PI4K2B</a>   | phosphatidylinositol 4-kinase type 2 beta                            |
| hsa-miR-200b-3p | <a href="#">ANKRD40</a>  | ankyrin repeat domain 40                                             |
| hsa-miR-200b-3p | <a href="#">VASH1</a>    | vasohibin 1                                                          |
| hsa-miR-200b-3p | <a href="#">PDS5B</a>    | PDS5 cohesin associated factor B                                     |
| hsa-miR-200b-3p | <a href="#">SLK</a>      | STE20 like kinase                                                    |
| hsa-miR-200b-3p | <a href="#">RTKN2</a>    | rhotekin 2                                                           |
| hsa-miR-200b-3p | <a href="#">RNF19A</a>   | ring finger protein 19A, RBR E3 ubiquitin protein ligase             |
| hsa-miR-200b-3p | <a href="#">FHL1</a>     | four and a half LIM domains 1                                        |
| hsa-miR-200b-3p | <a href="#">SPAG9</a>    | sperm associated antigen 9                                           |
| hsa-miR-200b-3p | <a href="#">DPY19L1</a>  | dpy-19 like C-mannosyltransferase 1                                  |
| hsa-miR-200b-3p | <a href="#">AMFR</a>     | autocrine motility factor receptor                                   |
| hsa-miR-200b-3p | <a href="#">ELAVL2</a>   | ELAV like RNA binding protein 2                                      |
| hsa-miR-200b-3p | <a href="#">LBR</a>      | lamin B receptor                                                     |
| hsa-miR-200b-3p | <a href="#">ZYG11B</a>   | zyg-11 family member B, cell cycle regulator                         |
| hsa-miR-200b-3p | <a href="#">CLIP1</a>    | CAP-Gly domain containing linker protein 1                           |
| hsa-miR-200b-3p | <a href="#">MOSMO</a>    | modulator of smoothened                                              |
| hsa-miR-200b-3p | <a href="#">WDR82</a>    | WD repeat domain 82                                                  |
| hsa-miR-200b-3p | <a href="#">SERPINI1</a> | serpin family I member 1                                             |
| hsa-miR-200b-3p | <a href="#">RASSF8</a>   | Ras association domain family member 8                               |

|                 |                         |                                                                              |
|-----------------|-------------------------|------------------------------------------------------------------------------|
| hsa-miR-200b-3p | <a href="#">JAZF1</a>   | JAZF zinc finger 1                                                           |
| hsa-miR-200b-3p | <a href="#">TOB1</a>    | transducer of ERBB2, 1                                                       |
| hsa-miR-200b-3p | <a href="#">EVI5</a>    | ecotropic viral integration site 5                                           |
| hsa-miR-200b-3p | <a href="#">B4GAT1</a>  | beta-1,4-glucuronyltransferase 1                                             |
| hsa-miR-200b-3p | <a href="#">POLK</a>    | DNA polymerase kappa                                                         |
| hsa-miR-200b-3p | <a href="#">CHRM2</a>   | cholinergic receptor muscarinic 2                                            |
| hsa-miR-200b-3p | <a href="#">TRAPPC8</a> | trafficking protein particle complex 8                                       |
| hsa-miR-200b-3p | <a href="#">PUM2</a>    | pumilio RNA binding family member 2                                          |
| hsa-miR-200b-3p | <a href="#">CDYL</a>    | chromodomain Y like                                                          |
| hsa-miR-200b-3p | <a href="#">YWHAG</a>   | tyrosine 3-monooxygenase/tryptophan 5-monooxygenase activation protein gamma |
| hsa-miR-200b-3p | <a href="#">SLC6A11</a> | solute carrier family 6 member 11                                            |
| hsa-miR-200b-3p | <a href="#">TCAIM</a>   | T cell activation inhibitor, mitochondrial                                   |
| hsa-miR-200b-3p | <a href="#">PKD1</a>    | polycystin 1, transient receptor potential channel interacting               |
| hsa-miR-200b-3p | <a href="#">FBXO30</a>  | F-box protein 30                                                             |
| hsa-miR-200b-3p | <a href="#">DNMT3B</a>  | DNA methyltransferase 3 beta                                                 |
| hsa-miR-200b-3p | <a href="#">FBXO33</a>  | F-box protein 33                                                             |
| hsa-miR-200b-3p | <a href="#">ITGA1</a>   | integrin subunit alpha 1                                                     |
| hsa-miR-200b-3p | <a href="#">OCLN</a>    | occludin                                                                     |
| hsa-miR-200b-3p | <a href="#">CEP85L</a>  | centrosomal protein 85 like                                                  |
| hsa-miR-200b-3p | <a href="#">VAT1L</a>   | vesicle amine transport 1 like                                               |
| hsa-miR-200b-3p | <a href="#">SCAMP1</a>  | secretory carrier membrane protein 1                                         |
| hsa-miR-200b-3p | <a href="#">GABBR2</a>  | gamma-aminobutyric acid type B receptor subunit 2                            |
| hsa-miR-200b-3p | <a href="#">CAB39</a>   | calcium binding protein 39                                                   |
| hsa-miR-200b-3p | <a href="#">ADAMTS3</a> | ADAM metalloproteinase with thrombospondin type 1 motif 3                    |
| hsa-miR-200b-3p | <a href="#">SCAI</a>    | suppressor of cancer cell invasion                                           |
| hsa-miR-200b-3p | <a href="#">NEDD1</a>   | neural precursor cell expressed, developmentally down-regulated 1            |
| hsa-miR-200b-3p | <a href="#">LRRC8A</a>  | leucine rich repeat containing 8 VRAC subunit A                              |
| hsa-miR-200b-3p | <a href="#">ANKRD44</a> | ankyrin repeat domain 44                                                     |
| hsa-miR-200b-3p | <a href="#">NRBP1</a>   | nuclear receptor binding protein 1                                           |
| hsa-miR-200b-3p | <a href="#">S100BP</a>  | S100P binding protein                                                        |
| hsa-miR-200b-3p | <a href="#">USP25</a>   | ubiquitin specific peptidase 25                                              |
| hsa-miR-200b-3p | <a href="#">MAP4K5</a>  | mitogen-activated protein kinase kinase kinase kinase 5                      |
| hsa-miR-200b-3p | <a href="#">CAMSAP2</a> | calmodulin regulated spectrin associated protein family member 2             |
| hsa-miR-200b-3p | <a href="#">HDAC9</a>   | histone deacetylase 9                                                        |
| hsa-miR-200b-3p | <a href="#">PPP1R9B</a> | protein phosphatase 1 regulatory subunit 9B                                  |
| hsa-miR-200b-3p | <a href="#">PMAIP1</a>  | phorbol-12-myristate-13-acetate-induced protein 1                            |
| hsa-miR-200b-3p | <a href="#">MAP4K4</a>  | mitogen-activated protein kinase kinase kinase kinase 4                      |
| hsa-miR-200b-3p | <a href="#">FSD1L</a>   | fibronectin type III and SPRY domain containing 1 like                       |
| hsa-miR-200b-3p | <a href="#">STK4</a>    | serine/threonine kinase 4                                                    |
| hsa-miR-200b-3p | <a href="#">TSC22D1</a> | TSC22 domain family member 1                                                 |
| hsa-miR-200b-3p | <a href="#">PSIP1</a>   | PC4 and SFRS1 interacting protein 1                                          |

|                 |                         |                                                                        |
|-----------------|-------------------------|------------------------------------------------------------------------|
| hsa-miR-200b-3p | <a href="#">MFAP5</a>   | microfibril associated protein 5                                       |
| hsa-miR-200b-3p | <a href="#">SLC4A7</a>  | solute carrier family 4 member 7                                       |
| hsa-miR-200b-3p | <a href="#">NOG</a>     | noggin                                                                 |
| hsa-miR-200b-3p | <a href="#">SLC6A1</a>  | solute carrier family 6 member 1                                       |
| hsa-miR-200b-3p | <a href="#">MIB1</a>    | mindbomb E3 ubiquitin protein ligase 1                                 |
| hsa-miR-200b-3p | <a href="#">DCBLD2</a>  | discoidin, CUB and LCCL domain containing 2                            |
| hsa-miR-200b-3p | <a href="#">DENND5B</a> | DENN domain containing 5B                                              |
| hsa-miR-200b-3p | <a href="#">CCNYL1</a>  | cyclin Y like 1                                                        |
| hsa-miR-200b-3p | <a href="#">CKAP4</a>   | cytoskeleton associated protein 4                                      |
| hsa-miR-200b-3p | <a href="#">STRN</a>    | striatin                                                               |
| hsa-miR-200b-3p | <a href="#">MARCH6</a>  | membrane associated ring-CH-type finger 6                              |
| hsa-miR-200b-3p | <a href="#">TMEFF2</a>  | transmembrane protein with EGF like and two follistatin like domains 2 |
| hsa-miR-200b-3p | <a href="#">GAS2L3</a>  | growth arrest specific 2 like 3                                        |
| hsa-miR-200b-3p | <a href="#">TLN2</a>    | talin 2                                                                |
| hsa-miR-200b-3p | <a href="#">HSPA13</a>  | heat shock protein family A (Hsp70) member 13                          |
| hsa-miR-200b-3p | <a href="#">SLC14A1</a> | solute carrier family 14 member 1 (Kidd blood group)                   |
| hsa-miR-200b-3p | <a href="#">PAG1</a>    | phosphoprotein membrane anchor with glycosphingolipid microdomains 1   |
| hsa-miR-200b-3p | <a href="#">NTRK2</a>   | neurotrophic receptor tyrosine kinase 2                                |
| hsa-miR-200b-3p | <a href="#">PIKFYVE</a> | phosphoinositide kinase, FYVE-type zinc finger containing              |
| hsa-miR-200b-3p | <a href="#">COPS8</a>   | COP9 signalosome subunit 8                                             |
| hsa-miR-200b-3p | <a href="#">USP27X</a>  | ubiquitin specific peptidase 27 X-linked                               |
| hsa-miR-200b-3p | <a href="#">KYNU</a>    | kynureninase                                                           |
| hsa-miR-200b-3p | <a href="#">TSSK1B</a>  | testis specific serine kinase 1B                                       |
| hsa-miR-200b-3p | <a href="#">PTPN12</a>  | protein tyrosine phosphatase, non-receptor type 12                     |
| hsa-miR-200b-3p | <a href="#">MARCKS</a>  | myristoylated alanine rich protein kinase C substrate                  |
| hsa-miR-200b-3p | <a href="#">AGFG1</a>   | ArfGAP with FG repeats 1                                               |
| hsa-miR-200b-3p | <a href="#">CBX4</a>    | chromobox 4                                                            |
| hsa-miR-200b-3p | <a href="#">CNOT9</a>   | CCR4-NOT transcription complex subunit 9                               |
| hsa-miR-200b-3p | <a href="#">ATP5F1B</a> | ATP synthase F1 subunit beta                                           |
| hsa-miR-200b-3p | <a href="#">ZKSCAN8</a> | zinc finger with KRAB and SCAN domains 8                               |
| hsa-miR-200b-3p | <a href="#">THAP2</a>   | THAP domain containing 2                                               |
| hsa-miR-200b-3p | <a href="#">TRMT9B</a>  | tRNA methyltransferase 9B (putative)                                   |
| hsa-miR-200b-3p | <a href="#">DIXDC1</a>  | DIX domain containing 1                                                |
| hsa-miR-200b-3p | <a href="#">NOVA1</a>   | NOVA alternative splicing regulator 1                                  |
| hsa-miR-200b-3p | <a href="#">DGKA</a>    | diacylglycerol kinase alpha                                            |
| hsa-miR-200b-3p | <a href="#">ZNF217</a>  | zinc finger protein 217                                                |
| hsa-miR-200b-3p | <a href="#">PCDH19</a>  | protocadherin 19                                                       |
| hsa-miR-200b-3p | <a href="#">SCN5A</a>   | sodium voltage-gated channel alpha subunit 5                           |
| hsa-miR-200b-3p | <a href="#">HS3ST1</a>  | heparan sulfate-glucosamine 3-sulfotransferase 1                       |
| hsa-miR-200b-3p | <a href="#">PITPNM3</a> | PITPNM family member 3                                                 |
| hsa-miR-200b-3p | <a href="#">GXYLT1</a>  | glucoside xylosyltransferase 1                                         |
| hsa-miR-200b-3p | <a href="#">PIM2</a>    | Pim-2 proto-oncogene, serine/threonine kinase                          |
| hsa-miR-200b-3p | <a href="#">INTS8</a>   | integrator complex subunit 8                                           |



|                 |                          |                                                          |
|-----------------|--------------------------|----------------------------------------------------------|
| hsa-miR-200b-3p | <a href="#">CRH</a>      | corticotropin releasing hormone                          |
| hsa-miR-200b-3p | <a href="#">RIMS2</a>    | regulating synaptic membrane exocytosis 2                |
| hsa-miR-200b-3p | <a href="#">GLI3</a>     | GLI family zinc finger 3                                 |
| hsa-miR-200b-3p | <a href="#">TOGARAM1</a> | TOG array regulator of axonemal microtubules 1           |
| hsa-miR-200b-3p | <a href="#">YPEL2</a>    | yippee like 2                                            |
| hsa-miR-200b-3p | <a href="#">ICAD</a>     | junctional cadherin 5 associated                         |
| hsa-miR-200b-3p | <a href="#">HDHD2</a>    | haloacid dehalogenase like hydrolase domain containing 2 |
| hsa-miR-200b-3p | <a href="#">ENO4</a>     | enolase 4                                                |
| hsa-miR-200b-3p | <a href="#">DENND5A</a>  | DENN domain containing 5A                                |
| hsa-miR-200b-3p | <a href="#">TIMP2</a>    | TIMP metalloproteinase inhibitor 2                       |
| hsa-miR-200b-3p | <a href="#">SES3</a>     | sestrin 3                                                |
| hsa-miR-200b-3p | <a href="#">USP6NL</a>   | USP6 N-terminal like                                     |
| hsa-miR-200b-3p | <a href="#">ERG</a>      | ETS transcription factor ERG                             |
| hsa-miR-200b-3p | <a href="#">CEP350</a>   | centrosomal protein 350                                  |
| hsa-miR-200b-3p | <a href="#">ZNF326</a>   | zinc finger protein 326                                  |
| hsa-miR-200b-3p | <a href="#">OSBPL11</a>  | oxysterol binding protein like 11                        |
| hsa-miR-200b-3p | <a href="#">NAP1L5</a>   | nucleosome assembly protein 1 like 5                     |
| hsa-miR-200b-3p | <a href="#">RBFOX2</a>   | RNA binding fox-1 homolog 2                              |
| hsa-miR-200b-3p | <a href="#">CYTH3</a>    | cytohesin 3                                              |
| hsa-miR-200b-3p | <a href="#">DPH6</a>     | diphthamine biosynthesis 6                               |
| hsa-miR-200b-3p | <a href="#">MATR3</a>    | matrin 3                                                 |
| hsa-miR-200b-3p | <a href="#">DNA2</a>     | DNA replication helicase/nuclease 2                      |
| hsa-miR-200b-3p | <a href="#">ATL2</a>     | atlastin GTPase 2                                        |
| hsa-miR-200b-3p | <a href="#">MAPRE1</a>   | microtubule associated protein RP/EB family member 1     |
| hsa-miR-200b-3p | <a href="#">ROCK2</a>    | Rho associated coiled-coil containing protein kinase 2   |
| hsa-miR-200b-3p | <a href="#">PROK2</a>    | prokineticin 2                                           |
| hsa-miR-200b-3p | <a href="#">DNAJB5</a>   | DnaJ heat shock protein family (Hsp40) member B5         |
| hsa-miR-200b-3p | <a href="#">ESRRG</a>    | estrogen related receptor gamma                          |
| hsa-miR-200b-3p | <a href="#">GNAQ</a>     | G protein subunit alpha q                                |
| hsa-miR-200b-3p | <a href="#">MAP4K3</a>   | mitogen-activated protein kinase kinase kinase kinase 3  |
| hsa-miR-200b-3p | <a href="#">CNEP1R1</a>  | CTD nuclear envelope phosphatase 1 regulatory subunit 1  |
| hsa-miR-200b-3p | <a href="#">RIPK2</a>    | receptor interacting serine/threonine kinase 2           |
| hsa-miR-200b-3p | <a href="#">ZBTB38</a>   | zinc finger and BTB domain containing 38                 |
| hsa-miR-200b-3p | <a href="#">FIGNL2</a>   | fidgetin like 2                                          |
| hsa-miR-200b-3p | <a href="#">ATAD2B</a>   | ATPase family, AAA domain containing 2B                  |
| hsa-miR-200b-3p | <a href="#">FOXN2</a>    | forkhead box N2                                          |
| hsa-miR-200b-3p | <a href="#">ETS1</a>     | ETS proto-oncogene 1, transcription factor               |
| hsa-miR-200b-3p | <a href="#">AKAP7</a>    | A-kinase anchoring protein 7                             |
| hsa-miR-200b-3p | <a href="#">PLPP3</a>    | phospholipid phosphatase 3                               |
| hsa-miR-200b-3p | <a href="#">SRGAP1</a>   | SLIT-ROBO Rho GTPase activating protein 1                |
| hsa-miR-200b-3p | <a href="#">HECTD2</a>   | HECT domain E3 ubiquitin protein ligase 2                |
| hsa-miR-200b-3p | <a href="#">ELK3</a>     | ELK3, ETS transcription factor                           |
| hsa-miR-200b-3p | <a href="#">CEP41</a>    | centrosomal protein 41                                   |

|                 |                          |                                                                                                   |
|-----------------|--------------------------|---------------------------------------------------------------------------------------------------|
| hsa-miR-200b-3p | <a href="#">CNKSR3</a>   | CNKSR family member 3                                                                             |
| hsa-miR-200b-3p | <a href="#">ULK2</a>     | unc-51 like autophagy activating kinase 2                                                         |
| hsa-miR-200b-3p | <a href="#">ZFPM2</a>    | zinc finger protein, FOG family member 2                                                          |
| hsa-miR-200b-3p | <a href="#">ZMAT3</a>    | zinc finger matrin-type 3                                                                         |
| hsa-miR-200b-3p | <a href="#">RDH10</a>    | retinol dehydrogenase 10                                                                          |
| hsa-miR-200b-3p | <a href="#">SLC25A36</a> | solute carrier family 25 member 36                                                                |
| hsa-miR-200b-3p | <a href="#">CCDC82</a>   | coiled-coil domain containing 82                                                                  |
| hsa-miR-200b-3p | <a href="#">SLC30A7</a>  | solute carrier family 30 member 7                                                                 |
| hsa-miR-200b-3p | <a href="#">SCD</a>      | stearoyl-CoA desaturase                                                                           |
| hsa-miR-200b-3p | <a href="#">XKR4</a>     | XK related 4                                                                                      |
| hsa-miR-200b-3p | <a href="#">ZCCHC24</a>  | zinc finger CCHC-type containing 24                                                               |
| hsa-miR-200b-3p | <a href="#">CNTN1</a>    | contactin 1                                                                                       |
| hsa-miR-200b-3p | <a href="#">SMARCD1</a>  | SWI/SNF related, matrix associated, actin dependent regulator of chromatin, subfamily d, member 1 |
| hsa-miR-200b-3p | <a href="#">NPM1</a>     | nucleophosmin 1                                                                                   |
| hsa-miR-200b-3p | <a href="#">ZSWIM4</a>   | zinc finger SWIM-type containing 4                                                                |
| hsa-miR-200b-3p | <a href="#">NCS1</a>     | neuronal calcium sensor 1                                                                         |
| hsa-miR-200b-3p | <a href="#">RO60</a>     | Ro60, Y RNA binding protein                                                                       |
| hsa-miR-200b-3p | <a href="#">PTAR1</a>    | protein prenyltransferase alpha subunit repeat containing 1                                       |
| hsa-miR-200b-3p | <a href="#">PLCL1</a>    | phospholipase C like 1 (inactive)                                                                 |
| hsa-miR-200b-3p | <a href="#">CYTH1</a>    | cytohesin 1                                                                                       |
| hsa-miR-200b-3p | <a href="#">TRHDE</a>    | thyrotropin releasing hormone degrading enzyme                                                    |
| hsa-miR-200b-3p | <a href="#">BCL11B</a>   | BCL11B, BAF complex component                                                                     |
| hsa-miR-200b-3p | <a href="#">EDEM3</a>    | ER degradation enhancing alpha-mannosidase like protein 3                                         |
| hsa-miR-200b-3p | <a href="#">FLII</a>     | FLII, actin remodeling protein                                                                    |
| hsa-miR-200b-3p | <a href="#">KRT80</a>    | keratin 80                                                                                        |
| hsa-miR-200b-3p | <a href="#">EIF2B5</a>   | eukaryotic translation initiation factor 2B subunit epsilon                                       |
| hsa-miR-200b-3p | <a href="#">FERMT2</a>   | fermitin family member 2                                                                          |
| hsa-miR-200b-3p | <a href="#">SERINC1</a>  | serine incorporator 1                                                                             |
| hsa-miR-200b-3p | <a href="#">ASAP1</a>    | ArfGAP with SH3 domain, ankyrin repeat and PH domain 1                                            |
| hsa-miR-200b-3p | <a href="#">RANBP10</a>  | RAN binding protein 10                                                                            |
| hsa-miR-200b-3p | <a href="#">RBFox3</a>   | RNA binding fox-1 homolog 3                                                                       |
| hsa-miR-200b-3p | <a href="#">HMGB3</a>    | high mobility group box 3                                                                         |
| hsa-miR-200b-3p | <a href="#">GJC1</a>     | gap junction protein gamma 1                                                                      |
| hsa-miR-200b-3p | <a href="#">CORO1C</a>   | coronin 1C                                                                                        |
| hsa-miR-200b-3p | <a href="#">HOOK3</a>    | hook microtubule tethering protein 3                                                              |
| hsa-miR-200b-3p | <a href="#">TAF12</a>    | TATA-box binding protein associated factor 12                                                     |
| hsa-miR-200b-3p | <a href="#">MARF1</a>    | meiosis regulator and mRNA stability factor 1                                                     |
| hsa-miR-200b-3p | <a href="#">NCK2</a>     | NCK adaptor protein 2                                                                             |
| hsa-miR-200b-3p | <a href="#">TSC22D2</a>  | TSC22 domain family member 2                                                                      |
| hsa-miR-200b-3p | <a href="#">CPED1</a>    | cadherin like and PC-esterase domain containing 1                                                 |
| hsa-miR-200b-3p | <a href="#">TBL1XR1</a>  | transducin beta like 1 X-linked receptor 1                                                        |
| hsa-miR-200b-3p | <a href="#">LRP1</a>     | LDL receptor related protein 1                                                                    |

|                 |                          |                                                         |
|-----------------|--------------------------|---------------------------------------------------------|
| hsa-miR-200b-3p | <a href="#">FARP1</a>    | FERM, ARH/RhoGEF and pleckstrin domain protein 1        |
| hsa-miR-200b-3p | <a href="#">WWC3</a>     | WWC family member 3                                     |
| hsa-miR-200b-3p | <a href="#">BNC2</a>     | basonuclein 2                                           |
| hsa-miR-200b-3p | <a href="#">PHEX</a>     | phosphate regulating endopeptidase homolog X-linked     |
| hsa-miR-200b-3p | <a href="#">PKIA</a>     | cAMP-dependent protein kinase inhibitor alpha           |
| hsa-miR-200b-3p | <a href="#">RAP1B</a>    | RAP1B, member of RAS oncogene family                    |
| hsa-miR-200b-3p | <a href="#">PTH1H</a>    | parathyroid hormone like hormone                        |
| hsa-miR-200b-3p | <a href="#">UHRF1BP1</a> | UHRF1 binding protein 1                                 |
| hsa-miR-200b-3p | <a href="#">GPR180</a>   | G protein-coupled receptor 180                          |
| hsa-miR-200b-3p | <a href="#">C11orf87</a> | chromosome 11 open reading frame 87                     |
| hsa-miR-200b-3p | <a href="#">CLASP2</a>   | cytoplasmic linker associated protein 2                 |
| hsa-miR-200b-3p | <a href="#">KLF4</a>     | Kruppel like factor 4                                   |
| hsa-miR-200b-3p | <a href="#">SCRT2</a>    | scratch family transcriptional repressor 2              |
| hsa-miR-200b-3p | <a href="#">RPS6KA3</a>  | ribosomal protein S6 kinase A3                          |
| hsa-miR-200b-3p | <a href="#">GPATCH8</a>  | G-patch domain containing 8                             |
| hsa-miR-200b-3p | <a href="#">GEM</a>      | GTP binding protein overexpressed in skeletal muscle    |
| hsa-miR-200b-3p | <a href="#">ZDHHC21</a>  | zinc finger DHHC-type containing 21                     |
| hsa-miR-200b-3p | <a href="#">EXO2</a>     | exo/endonuclease G                                      |
| hsa-miR-200b-3p | <a href="#">SGCE</a>     | sarcoglycan epsilon                                     |
| hsa-miR-200b-3p | <a href="#">SLITRK1</a>  | SLIT and NTRK like family member 1                      |
| hsa-miR-200b-3p | <a href="#">WASF1</a>    | WAS protein family member 1                             |
| hsa-miR-200b-3p | <a href="#">INSM2</a>    | INSM transcriptional repressor 2                        |
| hsa-miR-200b-3p | <a href="#">FLI1</a>     | Fli-1 proto-oncogene, ETS transcription factor          |
| hsa-miR-200b-3p | <a href="#">FAM118B</a>  | family with sequence similarity 118 member B            |
| hsa-miR-200b-3p | <a href="#">ERICH4</a>   | glutamate rich 4                                        |
| hsa-miR-200b-3p | <a href="#">SIX1</a>     | SIX homeobox 1                                          |
| hsa-miR-200b-3p | <a href="#">TMEM136</a>  | transmembrane protein 136                               |
| hsa-miR-200b-3p | <a href="#">GTPBP10</a>  | GTP binding protein 10                                  |
| hsa-miR-200b-3p | <a href="#">CHRNA6</a>   | cholinergic receptor nicotinic alpha 6 subunit          |
| hsa-miR-200b-3p | <a href="#">EXD2</a>     | exonuclease 3'-5' domain containing 2                   |
| hsa-miR-200b-3p | <a href="#">TLN1</a>     | talin 1                                                 |
| hsa-miR-200b-3p | <a href="#">SNRPB2</a>   | small nuclear ribonucleoprotein polypeptide B2          |
| hsa-miR-200b-3p | <a href="#">ZC3H4</a>    | zinc finger CCCH-type containing 4                      |
| hsa-miR-200b-3p | <a href="#">PI4KB</a>    | phosphatidylinositol 4-kinase beta                      |
| hsa-miR-200b-3p | <a href="#">SLC39A14</a> | solute carrier family 39 member 14                      |
| hsa-miR-200b-3p | <a href="#">PPP2R1B</a>  | protein phosphatase 2 scaffold subunit Abeta            |
| hsa-miR-200b-3p | <a href="#">NUDT4</a>    | nudix hydrolase 4                                       |
| hsa-miR-200b-3p | <a href="#">PDIK1L</a>   | PDLIM1 interacting kinase 1 like                        |
| hsa-miR-200b-3p | <a href="#">UBE2R2</a>   | ubiquitin conjugating enzyme E2 R2                      |
| hsa-miR-200b-3p | <a href="#">CDYL2</a>    | chromodomain Y like 2                                   |
| hsa-miR-200b-3p | <a href="#">FIGN</a>     | fidgetin, microtubule severing factor                   |
| hsa-miR-200b-3p | <a href="#">LIN7A</a>    | lin-7 homolog A, crumbs cell polarity complex component |
| hsa-miR-200b-3p | <a href="#">RRP15</a>    | ribosomal RNA processing 15 homolog                     |
| hsa-miR-200b-3p | <a href="#">HIPK1</a>    | homeodomain interacting protein kinase 1                |
| hsa-miR-200b-3p | <a href="#">SRI</a>      | sorcin                                                  |

|                 |                          |                                                                                      |
|-----------------|--------------------------|--------------------------------------------------------------------------------------|
| hsa-miR-200b-3p | <a href="#">IKAMP</a>    | JNK1/MAPK8 associated membrane protein                                               |
| hsa-miR-200b-3p | <a href="#">SDC2</a>     | syndecan 2                                                                           |
| hsa-miR-200b-3p | <a href="#">PTBP3</a>    | polypyrimidine tract binding protein 3                                               |
| hsa-miR-200b-3p | <a href="#">CUX1</a>     | cut like homeobox 1                                                                  |
| hsa-miR-200b-3p | <a href="#">DACH1</a>    | dachshund family transcription factor 1                                              |
| hsa-miR-200b-3p | <a href="#">PPP1R10</a>  | protein phosphatase 1 regulatory subunit 10                                          |
| hsa-miR-200b-3p | <a href="#">RDX</a>      | radixin                                                                              |
| hsa-miR-200b-3p | <a href="#">SLC35E2B</a> | solute carrier family 35 member E2B                                                  |
| hsa-miR-200b-3p | <a href="#">YWHAB</a>    | tyrosine 3-monooxygenase/tryptophan 5-monooxygenase activation protein beta          |
| hsa-miR-200b-3p | <a href="#">DDIT4L</a>   | DNA damage inducible transcript 4 like                                               |
| hsa-miR-200b-3p | <a href="#">SYVN1</a>    | synoviolin 1                                                                         |
| hsa-miR-200b-3p | <a href="#">DZIP1</a>    | DAZ interacting zinc finger protein 1                                                |
| hsa-miR-200b-3p | <a href="#">PPM1B</a>    | protein phosphatase, Mg <sup>2+</sup> /Mn <sup>2+</sup> dependent 1B                 |
| hsa-miR-200b-3p | <a href="#">SOX2</a>     | SRY-box 2                                                                            |
| hsa-miR-200b-3p | <a href="#">GLCCI1</a>   | glucocorticoid induced 1                                                             |
| hsa-miR-200b-3p | <a href="#">BDP1</a>     | B double prime 1, subunit of RNA polymerase III transcription initiation factor IIIB |
| hsa-miR-200b-3p | <a href="#">STRADB</a>   | STE20 related adaptor beta                                                           |
| hsa-miR-200b-3p | <a href="#">HS3ST3A1</a> | heparan sulfate-glucosamine 3-sulfotransferase 3A1                                   |
| hsa-miR-200b-3p | <a href="#">KIAA0355</a> | KIAA0355                                                                             |
| hsa-miR-200b-3p | <a href="#">SLF2</a>     | SMC5-SMC6 complex localization factor 2                                              |
| hsa-miR-200b-3p | <a href="#">ARHGAP20</a> | Rho GTPase activating protein 20                                                     |
| hsa-miR-200b-3p | <a href="#">IKZF2</a>    | IKAROS family zinc finger 2                                                          |
| hsa-miR-200b-3p | <a href="#">SLC35E2A</a> | solute carrier family 35 member E2A                                                  |
| hsa-miR-200b-3p | <a href="#">APOO</a>     | apolipoprotein O                                                                     |
| hsa-miR-200b-3p | <a href="#">SLC24A4</a>  | solute carrier family 24 member 4                                                    |
| hsa-miR-200b-3p | <a href="#">FSTL1</a>    | folliculin like 1                                                                    |
| hsa-miR-200b-3p | <a href="#">CASZ1</a>    | castor zinc finger 1                                                                 |
| hsa-miR-200b-3p | <a href="#">CTDSPL2</a>  | CTD small phosphatase like 2                                                         |
| hsa-miR-200b-3p | <a href="#">PCLAF</a>    | PCNA clamp associated factor                                                         |
| hsa-miR-200b-3p | <a href="#">FNDC3B</a>   | fibronectin type III domain containing 3B                                            |
| hsa-miR-200b-3p | <a href="#">A1CF</a>     | APOBEC1 complementation factor                                                       |
| hsa-miR-200b-3p | <a href="#">EIF4E2</a>   | eukaryotic translation initiation factor 4E family member 2                          |
| hsa-miR-200b-3p | <a href="#">NECTIN4</a>  | nectin cell adhesion molecule 4                                                      |
| hsa-miR-200b-3p | <a href="#">TMEM164</a>  | transmembrane protein 164                                                            |
| hsa-miR-200b-3p | <a href="#">PPP1R9A</a>  | protein phosphatase 1 regulatory subunit 9A                                          |
| hsa-miR-200b-3p | <a href="#">SNX16</a>    | sorting nexin 16                                                                     |
| hsa-miR-200b-3p | <a href="#">GTF3C4</a>   | general transcription factor IIIC subunit 4                                          |
| hsa-miR-200b-3p | <a href="#">RGL1</a>     | ral guanine nucleotide dissociation stimulator like 1                                |
| hsa-miR-200b-3p | <a href="#">SUZ12</a>    | SUZ12, polycomb repressive complex 2 subunit                                         |
| hsa-miR-200b-3p | <a href="#">CHSY1</a>    | chondroitin sulfate synthase 1                                                       |
| hsa-miR-200b-3p | <a href="#">KANK2</a>    | KN motif and ankyrin repeat domains 2                                                |
| hsa-miR-200b-3p | <a href="#">GSTA4</a>    | glutathione S-transferase alpha 4                                                    |
| hsa-miR-200b-3p | <a href="#">CLVS2</a>    | clavesin 2                                                                           |

|                 |                           |                                                                      |
|-----------------|---------------------------|----------------------------------------------------------------------|
| hsa-miR-200b-3p | <a href="#">NPC1</a>      | NPC intracellular cholesterol transporter 1                          |
| hsa-miR-200b-3p | <a href="#">PLXNC1</a>    | plexin C1                                                            |
| hsa-miR-200b-3p | <a href="#">ARID4B</a>    | AT-rich interaction domain 4B                                        |
| hsa-miR-200b-3p | <a href="#">TUBE</a>      | tubulin beta class I                                                 |
| hsa-miR-200b-3p | <a href="#">NAB1</a>      | NGFI-A binding protein 1                                             |
| hsa-miR-200b-3p | <a href="#">MBNL2</a>     | muscleblind like splicing regulator 2                                |
| hsa-miR-200b-3p | <a href="#">BICC1</a>     | BicC family RNA binding protein 1                                    |
| hsa-miR-200b-3p | <a href="#">CEP97</a>     | centrosomal protein 97                                               |
| hsa-miR-200b-3p | <a href="#">ANK3</a>      | ankyrin 3                                                            |
| hsa-miR-200b-3p | <a href="#">MYZAP</a>     | myocardial zonula adherens protein                                   |
| hsa-miR-200b-3p | <a href="#">DPY19L3</a>   | dpy-19 like C-mannosyltransferase 3                                  |
| hsa-miR-200b-3p | <a href="#">SEMA3F</a>    | semaphorin 3F                                                        |
| hsa-miR-200b-3p | <a href="#">IGF2R</a>     | insulin like growth factor 2 receptor                                |
| hsa-miR-200b-3p | <a href="#">TAP2</a>      | transporter 2, ATP binding cassette subfamily B member               |
| hsa-miR-200b-3p | <a href="#">LEPR</a>      | leptin receptor                                                      |
| hsa-miR-200b-3p | <a href="#">CASR</a>      | calcium sensing receptor                                             |
| hsa-miR-200b-3p | <a href="#">DCUN1D5</a>   | defective in cullin neddylation 1 domain containing 5                |
| hsa-miR-200b-3p | <a href="#">HNRNPD</a>    | heterogeneous nuclear ribonucleoprotein D                            |
| hsa-miR-200b-3p | <a href="#">DENND1B</a>   | DENN domain containing 1B                                            |
| hsa-miR-200b-3p | <a href="#">MTF2</a>      | metal response element binding transcription factor 2                |
| hsa-miR-200b-3p | <a href="#">UBE2W</a>     | ubiquitin conjugating enzyme E2 W                                    |
| hsa-miR-200b-3p | <a href="#">TBCA</a>      | tubulin folding cofactor A                                           |
| hsa-miR-200b-3p | <a href="#">MYB</a>       | MYB proto-oncogene, transcription factor                             |
| hsa-miR-200b-3p | <a href="#">PLPPR4</a>    | phospholipid phosphatase related 4                                   |
| hsa-miR-200b-3p | <a href="#">TRIM23</a>    | tripartite motif containing 23                                       |
| hsa-miR-200b-3p | <a href="#">IER5</a>      | immediate early response 5                                           |
| hsa-miR-200b-3p | <a href="#">CCNE2</a>     | cyclin E2                                                            |
| hsa-miR-200b-3p | <a href="#">CRTAP</a>     | cartilage associated protein                                         |
| hsa-miR-200b-3p | <a href="#">NUFIP2</a>    | nuclear FMR1 interacting protein 2                                   |
| hsa-miR-200b-3p | <a href="#">SECISBP2L</a> | SECIS binding protein 2 like                                         |
| hsa-miR-200b-3p | <a href="#">NOTCH1</a>    | notch 1                                                              |
| hsa-miR-200b-3p | <a href="#">PRDM1</a>     | PR/SET domain 1                                                      |
| hsa-miR-200b-3p | <a href="#">ALDH1A1</a>   | aldehyde dehydrogenase 1 family member A1                            |
| hsa-miR-200b-3p | <a href="#">DNAJB14</a>   | DnaJ heat shock protein family (Hsp40) member B14                    |
| hsa-miR-200b-3p | <a href="#">GATA4</a>     | GATA binding protein 4                                               |
| hsa-miR-200b-3p | <a href="#">GPATCH2L</a>  | G-patch domain containing 2 like                                     |
| hsa-miR-200b-3p | <a href="#">KIF14</a>     | kinesin family member 14                                             |
| hsa-miR-200b-3p | <a href="#">NYAP1</a>     | neuronal tyrosine phosphorylated phosphoinositide-3-kinase adaptor 1 |
| hsa-miR-200b-3p | <a href="#">SCN8A</a>     | sodium voltage-gated channel alpha subunit 8                         |
| hsa-miR-200b-3p | <a href="#">ATP6V0A2</a>  | ATPase H <sup>+</sup> transporting V0 subunit a2                     |
| hsa-miR-200b-3p | <a href="#">NRG1</a>      | neuregulin 1                                                         |
| hsa-miR-200b-3p | <a href="#">ACVR1C</a>    | activin A receptor type 1C                                           |
| hsa-miR-200b-3p | <a href="#">MTSS1L</a>    | MTSS1L, I-BAR domain containing                                      |
| hsa-miR-200b-3p | <a href="#">ADH1B</a>     | alcohol dehydrogenase 1B (class I), beta polypeptide                 |

|                 |                          |                                                           |
|-----------------|--------------------------|-----------------------------------------------------------|
| hsa-miR-200b-3p | <a href="#">GUCY1A1</a>  | guanylate cyclase 1 soluble subunit alpha 1               |
| hsa-miR-200b-3p | <a href="#">SBSPON</a>   | somatomedin B and thrombospondin type 1 domain containing |
| hsa-miR-200b-3p | <a href="#">PICALM</a>   | phosphatidylinositol binding clathrin assembly protein    |
| hsa-miR-200b-3p | <a href="#">KLF6</a>     | Kruppel like factor 6                                     |
| hsa-miR-200b-3p | <a href="#">CHMP5</a>    | charged multivesicular body protein 5                     |
| hsa-miR-200b-3p | <a href="#">EFNB2</a>    | ephrin B2                                                 |
| hsa-miR-200b-3p | <a href="#">MEX3D</a>    | mex-3 RNA binding family member D                         |
| hsa-miR-200b-3p | <a href="#">KCND2</a>    | potassium voltage-gated channel subfamily D member 2      |
| hsa-miR-200b-3p | <a href="#">SIKE1</a>    | suppressor of IKBKE 1                                     |
| hsa-miR-200b-3p | <a href="#">MSL2</a>     | MSL complex subunit 2                                     |
| hsa-miR-200b-3p | <a href="#">ZNF224</a>   | zinc finger protein 224                                   |
| hsa-miR-200b-3p | <a href="#">FRMD4B</a>   | FERM domain containing 4B                                 |
| hsa-miR-200b-3p | <a href="#">OXR1</a>     | oxidation resistance 1                                    |
| hsa-miR-200b-3p | <a href="#">CDH11</a>    | cadherin 11                                               |
| hsa-miR-200b-3p | <a href="#">IPO8</a>     | importin 8                                                |
| hsa-miR-200b-3p | <a href="#">BPTF</a>     | bromodomain PHD finger transcription factor               |
| hsa-miR-200b-3p | <a href="#">RSPRY1</a>   | ring finger and SPRY domain containing 1                  |
| hsa-miR-200b-3p | <a href="#">NDN</a>      | necdin, MAGE family member                                |
| hsa-miR-200b-3p | <a href="#">THSD7A</a>   | thrombospondin type 1 domain containing 7A                |
| hsa-miR-200b-3p | <a href="#">MMGT1</a>    | membrane magnesium transporter 1                          |
| hsa-miR-200b-3p | <a href="#">STX17</a>    | syntaxin 17                                               |
| hsa-miR-200b-3p | <a href="#">PHF6</a>     | PHD finger protein 6                                      |
| hsa-miR-200b-3p | <a href="#">ARHGEF17</a> | Rho guanine nucleotide exchange factor 17                 |
| hsa-miR-200b-3p | <a href="#">RABIF</a>    | RAB interacting factor                                    |
| hsa-miR-200b-3p | <a href="#">ETV5</a>     | ETS variant 5                                             |
| hsa-miR-200b-3p | <a href="#">CADM1</a>    | cell adhesion molecule 1                                  |
| hsa-miR-200b-3p | <a href="#">TMBIM4</a>   | transmembrane BAX inhibitor motif containing 4            |
| hsa-miR-200b-3p | <a href="#">ANLN</a>     | anillin actin binding protein                             |
| hsa-miR-200b-3p | <a href="#">NIN</a>      | ninein                                                    |
| hsa-miR-200b-3p | <a href="#">TAF9B</a>    | TATA-box binding protein associated factor 9b             |
| hsa-miR-200b-3p | <a href="#">BAG5</a>     | BCL2 associated athanogene 5                              |
| hsa-miR-200b-3p | <a href="#">PAPOLA</a>   | poly(A) polymerase alpha                                  |
| hsa-miR-200b-3p | <a href="#">NSD2</a>     | nuclear receptor binding SET domain protein 2             |
| hsa-miR-200b-3p | <a href="#">UBQLN1</a>   | ubiquilin 1                                               |
| hsa-miR-200b-3p | <a href="#">SHROOM2</a>  | shroom family member 2                                    |
| hsa-miR-200b-3p | <a href="#">LAMC1</a>    | laminin subunit gamma 1                                   |
| hsa-miR-200b-3p | <a href="#">SYNCRIP</a>  | synaptotagmin binding cytoplasmic RNA interacting protein |
| hsa-miR-200b-3p | <a href="#">CPEB3</a>    | cytoplasmic polyadenylation element binding protein 3     |
| hsa-miR-200b-3p | <a href="#">DCT</a>      | dopachrome tautomerase                                    |
| hsa-miR-200b-3p | <a href="#">CYP11B1</a>  | cytochrome P450 family 11 subfamily B member 1            |
| hsa-miR-200b-3p | <a href="#">ROBO2</a>    | roundabout guidance receptor 2                            |
| hsa-miR-200b-3p | <a href="#">XKR6</a>     | XK related 6                                              |
| hsa-miR-200b-3p | <a href="#">STXBP6</a>   | syntaxin binding protein 6                                |



|                 |                         |                                                          |
|-----------------|-------------------------|----------------------------------------------------------|
| hsa-miR-200b-3p | <a href="#">SWAP70</a>  | switching B cell complex subunit SWAP70                  |
| hsa-miR-200b-3p | <a href="#">LATS2</a>   | large tumor suppressor kinase 2                          |
| hsa-miR-200b-3p | <a href="#">FYN</a>     | FYN proto-oncogene, Src family tyrosine kinase           |
| hsa-miR-200b-3p | <a href="#">PPP1CB</a>  | protein phosphatase 1 catalytic subunit beta             |
| hsa-miR-200b-3p | <a href="#">RIMKLB</a>  | ribosomal modification protein rimK like family member B |
| hsa-miR-200b-3p | <a href="#">SASH1</a>   | SAM and SH3 domain containing 1                          |
| hsa-miR-200b-3p | <a href="#">NUP160</a>  | nucleoporin 160                                          |
| hsa-miR-200b-3p | <a href="#">SHOX2</a>   | short stature homeobox 2                                 |
| hsa-miR-200b-3p | <a href="#">HOXA5</a>   | homeobox A5                                              |
| hsa-miR-200b-3p | <a href="#">GABPA</a>   | GA binding protein transcription factor subunit alpha    |
| hsa-miR-200b-3p | <a href="#">SLC15A5</a> | solute carrier family 15 member 5                        |
| hsa-miR-200b-3p | <a href="#">KANK1</a>   | KN motif and ankyrin repeat domains 1                    |
| hsa-miR-200b-3p | <a href="#">LMO7</a>    | LIM domain 7                                             |
| hsa-miR-200b-3p | <a href="#">TMA16</a>   | translation machinery associated 16 homolog              |
| hsa-miR-200b-3p | <a href="#">PCSK2</a>   | proprotein convertase subtilisin/kexin type 2            |
| hsa-miR-200b-3p | <a href="#">SH3GL1</a>  | SH3 domain containing GRB2 like 1, endophilin A2         |
| hsa-miR-200b-3p | <a href="#">SLC38A2</a> | solute carrier family 38 member 2                        |
| hsa-miR-200b-3p | <a href="#">CNN3</a>    | calponin 3                                               |
| hsa-miR-200b-3p | <a href="#">ZNF302</a>  | zinc finger protein 302                                  |
| hsa-miR-200b-3p | <a href="#">RNF5</a>    | ring finger protein 5                                    |
| hsa-miR-200b-3p | <a href="#">FSIP1</a>   | fibrous sheath interacting protein 1                     |
| hsa-miR-200b-3p | <a href="#">LRRC58</a>  | leucine rich repeat containing 58                        |
| hsa-miR-200b-3p | <a href="#">CNTFR</a>   | ciliary neurotrophic factor receptor                     |
| hsa-miR-200b-3p | <a href="#">ZFHX4</a>   | zinc finger homeobox 4                                   |
| hsa-miR-200b-3p | <a href="#">ELMOD1</a>  | ELMO domain containing 1                                 |
| hsa-miR-200b-3p | <a href="#">CASP2</a>   | caspase 2                                                |
| hsa-miR-200b-3p | <a href="#">LCA5</a>    | LCA5, lebercilin                                         |
| hsa-miR-200b-3p | <a href="#">RAPGEF2</a> | Rap guanine nucleotide exchange factor 2                 |
| hsa-miR-200b-3p | <a href="#">IKBKB</a>   | inhibitor of nuclear factor kappa B kinase subunit beta  |
| hsa-miR-200b-3p | <a href="#">SPTSSA</a>  | serine palmitoyltransferase small subunit A              |
| hsa-miR-200b-3p | <a href="#">FUNDCl</a>  | FUN14 domain containing 1                                |
| hsa-miR-200b-3p | <a href="#">UBXN8</a>   | UBX domain protein 8                                     |
| hsa-miR-200b-3p | <a href="#">SRP72</a>   | signal recognition particle 72                           |
| hsa-miR-200b-3p | <a href="#">NFIB</a>    | nuclear factor I B                                       |
| hsa-miR-200b-3p | <a href="#">USP18</a>   | ubiquitin specific peptidase 18                          |
| hsa-miR-200b-3p | <a href="#">TBCK</a>    | TBC1 domain containing kinase                            |
| hsa-miR-200b-3p | <a href="#">LARP1B</a>  | La ribonucleoprotein domain family member 1B             |
| hsa-miR-200b-3p | <a href="#">RNF180</a>  | ring finger protein 180                                  |
| hsa-miR-200b-3p | <a href="#">UBE2D1</a>  | ubiquitin conjugating enzyme E2 D1                       |
| hsa-miR-200b-3p | <a href="#">GTF2E1</a>  | general transcription factor IIE subunit 1               |
| hsa-miR-200b-3p | <a href="#">SBF1</a>    | SET binding factor 1                                     |
| hsa-miR-200b-3p | <a href="#">SIX3</a>    | SIX homeobox 3                                           |
| hsa-miR-200b-3p | <a href="#">UBA6</a>    | ubiquitin like modifier activating enzyme 6              |
| hsa-miR-200b-3p | <a href="#">PLK2</a>    | polo like kinase 2                                       |
| hsa-miR-200b-3p | <a href="#">SUPT20H</a> | SPT20 homolog, SAGA complex component                    |

|                 |                          |                                                                           |
|-----------------|--------------------------|---------------------------------------------------------------------------|
| hsa-miR-200b-3p | <a href="#">YAP1</a>     | Yes associated protein 1                                                  |
| hsa-miR-200b-3p | <a href="#">KLHL29</a>   | kelch like family member 29                                               |
| hsa-miR-200b-3p | <a href="#">ZBTB20</a>   | zinc finger and BTB domain containing 20                                  |
| hsa-miR-200b-3p | <a href="#">C6orf120</a> | chromosome 6 open reading frame 120                                       |
| hsa-miR-200b-3p | <a href="#">TRIM71</a>   | tripartite motif containing 71                                            |
| hsa-miR-200b-3p | <a href="#">SLC16A2</a>  | solute carrier family 16 member 2                                         |
| hsa-miR-200b-3p | <a href="#">GNAI3</a>    | G protein subunit alpha i3                                                |
| hsa-miR-200b-3p | <a href="#">EFNA1</a>    | ephrin A1                                                                 |
| hsa-miR-200b-3p | <a href="#">USP43</a>    | ubiquitin specific peptidase 43                                           |
| hsa-miR-200b-3p | <a href="#">PAK6</a>     | p21 (RAC1) activated kinase 6                                             |
| hsa-miR-200b-3p | <a href="#">KMT2C</a>    | lysine methyltransferase 2C                                               |
| hsa-miR-200b-3p | <a href="#">AMBRA1</a>   | autophagy and beclin 1 regulator 1                                        |
| hsa-miR-200b-3p | <a href="#">RASSF6</a>   | Ras association domain family member 6                                    |
| hsa-miR-200b-3p | <a href="#">EPHA5</a>    | EPH receptor A5                                                           |
| hsa-miR-200b-3p | <a href="#">KDSR</a>     | 3-ketodihydrosphingosine reductase                                        |
| hsa-miR-200b-3p | <a href="#">MSANTD2</a>  | Myb/SANT DNA binding domain containing 2                                  |
| hsa-miR-200b-3p | <a href="#">ZNF697</a>   | zinc finger protein 697                                                   |
| hsa-miR-200b-3p | <a href="#">PRKN</a>     | parkin RBR E3 ubiquitin protein ligase                                    |
| hsa-miR-200b-3p | <a href="#">CDR2</a>     | cerebellar degeneration related protein 2                                 |
| hsa-miR-200b-3p | <a href="#">ASH1L</a>    | ASH1 like histone lysine methyltransferase                                |
| hsa-miR-200b-3p | <a href="#">TIFA</a>     | TRAF interacting protein with forkhead associated domain                  |
| hsa-miR-200b-3p | <a href="#">SLC4A4</a>   | solute carrier family 4 member 4                                          |
| hsa-miR-200b-3p | <a href="#">ANO5</a>     | anoctamin 5                                                               |
| hsa-miR-200b-3p | <a href="#">MXD4</a>     | MAX dimerization protein 4                                                |
| hsa-miR-200b-3p | <a href="#">NRXN1</a>    | neurexin 1                                                                |
| hsa-miR-200b-3p | <a href="#">TMX1</a>     | thioredoxin related transmembrane protein 1                               |
| hsa-miR-200b-3p | <a href="#">SLC39A8</a>  | solute carrier family 39 member 8                                         |
| hsa-miR-200b-3p | <a href="#">B4GALT6</a>  | beta-1,4-galactosyltransferase 6                                          |
| hsa-miR-200b-3p | <a href="#">GAB1</a>     | GRB2 associated binding protein 1                                         |
| hsa-miR-200b-3p | <a href="#">AAK1</a>     | AP2 associated kinase 1                                                   |
| hsa-miR-200b-3p | <a href="#">DNAJB6</a>   | DnaJ heat shock protein family (Hsp40) member B6                          |
| hsa-miR-200b-3p | <a href="#">STYX</a>     | serine/threonine/tyrosine interacting protein                             |
| hsa-miR-200b-3p | <a href="#">TAF4</a>     | TATA-box binding protein associated factor 4                              |
| hsa-miR-200b-3p | <a href="#">KCNMB1</a>   | potassium calcium-activated channel subfamily M regulatory beta subunit 1 |
| hsa-miR-200b-3p | <a href="#">RNF169</a>   | ring finger protein 169                                                   |
| hsa-miR-200b-3p | <a href="#">C4orf46</a>  | chromosome 4 open reading frame 46                                        |
| hsa-miR-200b-3p | <a href="#">FAM227A</a>  | family with sequence similarity 227 member A                              |
| hsa-miR-200b-3p | <a href="#">CPPED1</a>   | calcineurin like phosphoesterase domain containing 1                      |
| hsa-miR-200b-3p | <a href="#">ICK</a>      | intestinal cell kinase                                                    |
| hsa-miR-200b-3p | <a href="#">TMEM135</a>  | transmembrane protein 135                                                 |
| hsa-miR-200b-3p | <a href="#">TBC1D22B</a> | TBC1 domain family member 22B                                             |
| hsa-miR-200b-3p | <a href="#">CCDC186</a>  | coiled-coil domain containing 186                                         |
| hsa-miR-200b-3p | <a href="#">SLC35A2</a>  | solute carrier family 35 member A2                                        |

|                 |                          |                                                                 |
|-----------------|--------------------------|-----------------------------------------------------------------|
| hsa-miR-200b-3p | <a href="#">SEC24A</a>   | SEC24 homolog A, COPII coat complex component                   |
| hsa-miR-200b-3p | <a href="#">DNAJC10</a>  | DnaJ heat shock protein family (Hsp40) member C10               |
| hsa-miR-200b-3p | <a href="#">GRAP2</a>    | GRB2 related adaptor protein 2                                  |
| hsa-miR-200b-3p | <a href="#">KPNA4</a>    | karyopherin subunit alpha 4                                     |
| hsa-miR-200b-3p | <a href="#">YTHDF3</a>   | YTH N6-methyladenosine RNA binding protein 3                    |
| hsa-miR-200b-3p | <a href="#">NCOA7</a>    | nuclear receptor coactivator 7                                  |
| hsa-miR-200b-3p | <a href="#">FBXO22</a>   | F-box protein 22                                                |
| hsa-miR-200b-3p | <a href="#">UBE2I</a>    | ubiquitin conjugating enzyme E2 I                               |
| hsa-miR-200b-3p | <a href="#">ADRB2</a>    | adrenoceptor beta 2                                             |
| hsa-miR-200b-3p | <a href="#">UBAC2</a>    | UBA domain containing 2                                         |
| hsa-miR-200b-3p | <a href="#">RAB8B</a>    | RAB8B, member RAS oncogene family                               |
| hsa-miR-200b-3p | <a href="#">RFTN2</a>    | raftlin family member 2                                         |
| hsa-miR-200b-3p | <a href="#">ADCY9</a>    | adenylate cyclase 9                                             |
| hsa-miR-200b-3p | <a href="#">PCDH7</a>    | protocadherin 7                                                 |
| hsa-miR-200b-3p | <a href="#">MIER3</a>    | MIER family member 3                                            |
| hsa-miR-200b-3p | <a href="#">PHACTR2</a>  | phosphatase and actin regulator 2                               |
| hsa-miR-200b-3p | <a href="#">CACUL1</a>   | CDK2 associated cullin domain 1                                 |
| hsa-miR-200b-3p | <a href="#">BLOC1S6</a>  | biogenesis of lysosomal organelles complex 1 subunit 6          |
| hsa-miR-200b-3p | <a href="#">SOX1</a>     | SRY-box 1                                                       |
| hsa-miR-200b-3p | <a href="#">KIAA1841</a> | KIAA1841                                                        |
| hsa-miR-200b-3p | <a href="#">PRKAR1A</a>  | protein kinase cAMP-dependent type I regulatory subunit alpha   |
| hsa-miR-200b-3p | <a href="#">HTR2A</a>    | 5-hydroxytryptamine receptor 2A                                 |
| hsa-miR-200b-3p | <a href="#">FUT9</a>     | fucosyltransferase 9                                            |
| hsa-miR-200b-3p | <a href="#">ACVR2B</a>   | activin A receptor type 2B                                      |
| hsa-miR-200b-3p | <a href="#">LONRF2</a>   | LON peptidase N-terminal domain and ring finger 2               |
| hsa-miR-200b-3p | <a href="#">RRAS2</a>    | RAS related 2                                                   |
| hsa-miR-200b-3p | <a href="#">ENOX2</a>    | ecto-NOX disulfide-thiol exchanger 2                            |
| hsa-miR-200b-3p | <a href="#">ZFY</a>      | zinc finger protein Y-linked                                    |
| hsa-miR-200b-3p | <a href="#">TM7SF3</a>   | transmembrane 7 superfamily member 3                            |
| hsa-miR-200b-3p | <a href="#">MTMR6</a>    | myotubularin related protein 6                                  |
| hsa-miR-200b-3p | <a href="#">MAGEC2</a>   | MAGE family member C2                                           |
| hsa-miR-200b-3p | <a href="#">ZFR</a>      | zinc finger RNA binding protein                                 |
| hsa-miR-200b-3p | <a href="#">AP1AR</a>    | adaptor related protein complex 1 associated regulatory protein |
| hsa-miR-200b-3p | <a href="#">NCOA4</a>    | nuclear receptor coactivator 4                                  |
| hsa-miR-200b-3p | <a href="#">PSTPIP2</a>  | proline-serine-threonine phosphatase interacting protein 2      |
| hsa-miR-200b-3p | <a href="#">FUBP3</a>    | far upstream element binding protein 3                          |
| hsa-miR-200b-3p | <a href="#">SHCBP1</a>   | SHC binding and spindle associated 1                            |
| hsa-miR-200b-3p | <a href="#">TIAL1</a>    | TIA1 cytotoxic granule associated RNA binding protein like 1    |
| hsa-miR-200b-3p | <a href="#">MEX3B</a>    | mex-3 RNA binding family member B                               |
| hsa-miR-200b-3p | <a href="#">GPR173</a>   | G protein-coupled receptor 173                                  |
| hsa-miR-200b-3p | <a href="#">SYNC</a>     | syncoilin, intermediate filament protein                        |
| hsa-miR-200b-3p | <a href="#">GIGYF1</a>   | GRB10 interacting GYF protein 1                                 |

|                 |                             |                                                                        |
|-----------------|-----------------------------|------------------------------------------------------------------------|
| hsa-miR-200b-3p | <a href="#">IQCI-SCHIP1</a> | IQCI-SCHIP1 readthrough                                                |
| hsa-miR-200b-3p | <a href="#">XG</a>          | Xg glycoprotein (Xg blood group)                                       |
| hsa-miR-200b-3p | <a href="#">ZBTB8A</a>      | zinc finger and BTB domain containing 8A                               |
| hsa-miR-200b-3p | <a href="#">TMEM170B</a>    | transmembrane protein 170B                                             |
| hsa-miR-200b-3p | <a href="#">UTY</a>         | ubiquitously transcribed tetratricopeptide repeat containing, Y-linked |
| hsa-miR-200b-3p | <a href="#">EIF5B</a>       | eukaryotic translation initiation factor 5B                            |
| hsa-miR-200b-3p | <a href="#">NCAM1</a>       | neural cell adhesion molecule 1                                        |
| hsa-miR-200b-3p | <a href="#">PAIP2</a>       | poly(A) binding protein interacting protein 2                          |
| hsa-miR-200b-3p | <a href="#">RBFOX1</a>      | RNA binding fox-1 homolog 1                                            |
| hsa-miR-200b-3p | <a href="#">SNAP25</a>      | synaptosome associated protein 25                                      |
| hsa-miR-200b-3p | <a href="#">EP300</a>       | E1A binding protein p300                                               |
| hsa-miR-200b-3p | <a href="#">CERS6</a>       | ceramide synthase 6                                                    |
| hsa-miR-200b-3p | <a href="#">GMFB</a>        | glia maturation factor beta                                            |
| hsa-miR-200b-3p | <a href="#">NFYA</a>        | nuclear transcription factor Y subunit alpha                           |
| hsa-miR-200b-3p | <a href="#">PARD3B</a>      | par-3 family cell polarity regulator beta                              |
| hsa-miR-200b-3p | <a href="#">HNF1B</a>       | HNF1 homeobox B                                                        |
| hsa-miR-200b-3p | <a href="#">MARCH8</a>      | membrane associated ring-CH-type finger 8                              |
| hsa-miR-200b-3p | <a href="#">ZDHHC17</a>     | zinc finger DHHC-type containing 17                                    |
| hsa-miR-200b-3p | <a href="#">C5orf24</a>     | chromosome 5 open reading frame 24                                     |
| hsa-miR-200b-3p | <a href="#">WDR91</a>       | WD repeat domain 91                                                    |
| hsa-miR-200b-3p | <a href="#">COG6</a>        | component of oligomeric golgi complex 6                                |
| hsa-miR-200b-3p | <a href="#">MSTN</a>        | myostatin                                                              |
| hsa-miR-200b-3p | <a href="#">CREBBP</a>      | CREB binding protein                                                   |
| hsa-miR-200b-3p | <a href="#">NDNF</a>        | neuron derived neurotrophic factor                                     |
| hsa-miR-200b-3p | <a href="#">ACACA</a>       | acetyl-CoA carboxylase alpha                                           |
| hsa-miR-200b-3p | <a href="#">OPRM1</a>       | opioid receptor mu 1                                                   |
| hsa-miR-200b-3p | <a href="#">CALU</a>        | calumenin                                                              |
| hsa-miR-200b-3p | <a href="#">RSRC2</a>       | arginine and serine rich coiled-coil 2                                 |
| hsa-miR-200b-3p | <a href="#">LPAR1</a>       | lysophosphatidic acid receptor 1                                       |
| hsa-miR-200b-3p | <a href="#">PTPN22</a>      | protein tyrosine phosphatase, non-receptor type 22                     |
| hsa-miR-200b-3p | <a href="#">RHOT1</a>       | ras homolog family member T1                                           |
| hsa-miR-200b-3p | <a href="#">N4BP2</a>       | NEDD4 binding protein 2                                                |
| hsa-miR-200b-3p | <a href="#">RNF38</a>       | ring finger protein 38                                                 |
| hsa-miR-200b-3p | <a href="#">RBM26</a>       | RNA binding motif protein 26                                           |
| hsa-miR-200b-3p | <a href="#">SLTM</a>        | SAFB like transcription modulator                                      |
| hsa-miR-200b-3p | <a href="#">CLOCK</a>       | clock circadian regulator                                              |
| hsa-miR-200b-3p | <a href="#">CDC73</a>       | cell division cycle 73                                                 |
| hsa-miR-200b-3p | <a href="#">PLS3</a>        | plastin 3                                                              |
| hsa-miR-200b-3p | <a href="#">ADCY2</a>       | adenylate cyclase 2                                                    |
| hsa-miR-200b-3p | <a href="#">CALN1</a>       | calneuron 1                                                            |
| hsa-miR-200b-3p | <a href="#">C15orf40</a>    | chromosome 15 open reading frame 40                                    |
| hsa-miR-200b-3p | <a href="#">TP73</a>        | tumor protein p73                                                      |
| hsa-miR-200b-3p | <a href="#">FRMD4A</a>      | FERM domain containing 4A                                              |
| hsa-miR-200b-3p | <a href="#">TMEM170A</a>    | transmembrane protein 170A                                             |

|                 |                          |                                                            |
|-----------------|--------------------------|------------------------------------------------------------|
| hsa-miR-200b-3p | <a href="#">DCAF17</a>   | DDB1 and CUL4 associated factor 17                         |
| hsa-miR-200b-3p | <a href="#">ANGEL2</a>   | angel homolog 2                                            |
| hsa-miR-200b-3p | <a href="#">RPRD1A</a>   | regulation of nuclear pre-mRNA domain containing 1A        |
| hsa-miR-200b-3p | <a href="#">EHD1</a>     | EH domain containing 1                                     |
| hsa-miR-200b-3p | <a href="#">ACADSB</a>   | acyl-CoA dehydrogenase short/branched chain                |
| hsa-miR-200b-3p | <a href="#">ARL15</a>    | ADP ribosylation factor like GTPase 15                     |
| hsa-miR-200b-3p | <a href="#">ALG2</a>     | ALG2, alpha-1,3/1,6-mannosyltransferase                    |
| hsa-miR-200b-3p | <a href="#">PALM2</a>    | paralemmin 2                                               |
| hsa-miR-200b-3p | <a href="#">PPWD1</a>    | peptidylprolyl isomerase domain and WD repeat containing 1 |
| hsa-miR-200b-3p | <a href="#">ARGLU1</a>   | arginine and glutamate rich 1                              |
| hsa-miR-200b-3p | <a href="#">TMEM33</a>   | transmembrane protein 33                                   |
| hsa-miR-200b-3p | <a href="#">PPARA</a>    | peroxisome proliferator activated receptor alpha           |
| hsa-miR-200b-3p | <a href="#">PTGER2</a>   | prostaglandin E receptor 2                                 |
| hsa-miR-200b-3p | <a href="#">C19orf12</a> | chromosome 19 open reading frame 12                        |
| hsa-miR-200b-3p | <a href="#">BAG6</a>     | BCL2 associated athanogene 6                               |
| hsa-miR-200b-3p | <a href="#">TLL2</a>     | tolloid like 2                                             |
| hsa-miR-200b-3p | <a href="#">ANKRD33B</a> | ankyrin repeat domain 33B                                  |
| hsa-miR-200b-3p | <a href="#">PNISR</a>    | PNN interacting serine and arginine rich protein           |
| hsa-miR-200b-3p | <a href="#">DOCK4</a>    | dedicator of cytokinesis 4                                 |
| hsa-miR-200b-3p | <a href="#">MTMR9</a>    | myotubularin related protein 9                             |
| hsa-miR-200b-3p | <a href="#">ZNF557</a>   | zinc finger protein 557                                    |
| hsa-miR-200b-3p | <a href="#">C2CD6</a>    | C2 calcium dependent domain containing 6                   |
| hsa-miR-200b-3p | <a href="#">FAM81A</a>   | family with sequence similarity 81 member A                |
| hsa-miR-200b-3p | <a href="#">FASTKD3</a>  | FAST kinase domains 3                                      |
| hsa-miR-200b-3p | <a href="#">TMEM245</a>  | transmembrane protein 245                                  |
| hsa-miR-200b-3p | <a href="#">MON2</a>     | MON2 homolog, regulator of endosome-to-Golgi trafficking   |
| hsa-miR-200b-3p | <a href="#">MXD3</a>     | MAX dimerization protein 3                                 |
| hsa-miR-200b-3p | <a href="#">KIF11</a>    | kinesin family member 11                                   |
| hsa-miR-200b-3p | <a href="#">AFF4</a>     | AF4/FMR2 family member 4                                   |
| hsa-miR-200b-3p | <a href="#">SLC6A15</a>  | solute carrier family 6 member 15                          |
| hsa-miR-200b-3p | <a href="#">CNST</a>     | consortin, connexin sorting protein                        |
| hsa-miR-200b-3p | <a href="#">PPP2CA</a>   | protein phosphatase 2 catalytic subunit alpha              |
| hsa-miR-200b-3p | <a href="#">CTNND2</a>   | catenin delta 2                                            |
| hsa-miR-200b-3p | <a href="#">PHC3</a>     | polyhomeotic homolog 3                                     |
| hsa-miR-200b-3p | <a href="#">ORMDL3</a>   | ORMDL sphingolipid biosynthesis regulator 3                |
| hsa-miR-200b-3p | <a href="#">SRF</a>      | serum response factor                                      |
| hsa-miR-200b-3p | <a href="#">CASK</a>     | calcium/calmodulin dependent serine protein kinase         |
| hsa-miR-200b-3p | <a href="#">LCORL</a>    | ligand dependent nuclear receptor corepressor like         |
| hsa-miR-200b-3p | <a href="#">YPEL1</a>    | yippee like 1                                              |
| hsa-miR-200b-3p | <a href="#">GABRB3</a>   | gamma-aminobutyric acid type A receptor beta3 subunit      |
| hsa-miR-200b-3p | <a href="#">TFPI</a>     | tissue factor pathway inhibitor                            |
| hsa-miR-200b-3p | <a href="#">UNC80</a>    | unc-80 homolog, NALCN channel complex subunit              |
| hsa-miR-200b-3p | <a href="#">FLT4</a>     | fms related tyrosine kinase 4                              |

|                 |                                |                                                               |
|-----------------|--------------------------------|---------------------------------------------------------------|
| hsa-miR-200b-3p | <a href="#">MKLN1</a>          | muskelin 1                                                    |
| hsa-miR-200b-3p | <a href="#">STARD13</a>        | StAR related lipid transfer domain containing 13              |
| hsa-miR-200b-3p | <a href="#">BPY2C</a>          | basic charge Y-linked 2C                                      |
| hsa-miR-200b-3p | <a href="#">MAMDC2</a>         | MAM domain containing 2                                       |
| hsa-miR-200b-3p | <a href="#">BPY2B</a>          | basic charge Y-linked 2B                                      |
| hsa-miR-200b-3p | <a href="#">SSR3</a>           | signal sequence receptor subunit 3                            |
| hsa-miR-200b-3p | <a href="#">SLC25A27</a>       | solute carrier family 25 member 27                            |
| hsa-miR-200b-3p | <a href="#">FUT4</a>           | fucosyltransferase 4                                          |
| hsa-miR-200b-3p | <a href="#">LFNG</a>           | LFNG O-fucosylpeptide 3-beta-N-acetylglucosaminyltransferase  |
| hsa-miR-200b-3p | <a href="#">UBE2V1</a>         | ubiquitin conjugating enzyme E2 V1                            |
| hsa-miR-200b-3p | <a href="#">FHOD1</a>          | formin homology 2 domain containing 1                         |
| hsa-miR-200b-3p | <a href="#">SYT1</a>           | synaptotagmin 1                                               |
| hsa-miR-200b-3p | <a href="#">TIGAR</a>          | TP53 induced glycolysis regulatory phosphatase                |
| hsa-miR-200b-3p | <a href="#">FBXW11</a>         | F-box and WD repeat domain containing 11                      |
| hsa-miR-200b-3p | <a href="#">DSG1</a>           | desmoglein 1                                                  |
| hsa-miR-200b-3p | <a href="#">LETM2</a>          | leucine zipper and EF-hand containing transmembrane protein 2 |
| hsa-miR-200b-3p | <a href="#">MYT1</a>           | myelin transcription factor 1                                 |
| hsa-miR-200b-3p | <a href="#">TAB3</a>           | TGF-beta activated kinase 1 (MAP3K7) binding protein 3        |
| hsa-miR-200b-3p | <a href="#">PCNX1</a>          | pecanex 1                                                     |
| hsa-miR-200b-3p | <a href="#">ZNF292</a>         | zinc finger protein 292                                       |
| hsa-miR-200b-3p | <a href="#">TBX5</a>           | T-box 5                                                       |
| hsa-miR-200b-3p | <a href="#">BPY2</a>           | basic charge Y-linked 2                                       |
| hsa-miR-200b-3p | <a href="#">MMD2</a>           | monocyte to macrophage differentiation associated 2           |
| hsa-miR-200b-3p | <a href="#">RAC1</a>           | Rac family small GTPase 1                                     |
| hsa-miR-200b-3p | <a href="#">TMEM189-UBE2V1</a> | TMEM189-UBE2V1 readthrough                                    |
| hsa-miR-200b-3p | <a href="#">STAM2</a>          | signal transducing adaptor molecule 2                         |
| hsa-miR-200b-3p | <a href="#">CHST2</a>          | carbohydrate sulfotransferase 2                               |
| hsa-miR-200b-3p | <a href="#">GLRX3</a>          | glutaredoxin 3                                                |
| hsa-miR-200b-3p | <a href="#">NLGN4X</a>         | neuroligin 4 X-linked                                         |
| hsa-miR-200b-3p | <a href="#">BTF3L4</a>         | basic transcription factor 3 like 4                           |
| hsa-miR-200b-3p | <a href="#">SOWAHC</a>         | sosondowah ankyrin repeat domain family member C              |
| hsa-miR-200b-3p | <a href="#">SGPP1</a>          | sphingosine-1-phosphate phosphatase 1                         |
| hsa-miR-200b-3p | <a href="#">PRRG4</a>          | proline rich and Gla domain 4                                 |
| hsa-miR-200b-3p | <a href="#">ZC3H12B</a>        | zinc finger CCCH-type containing 12B                          |
| hsa-miR-200b-3p | <a href="#">NPTX1</a>          | neuronal pentraxin 1                                          |
| hsa-miR-200b-3p | <a href="#">TMEM167A</a>       | transmembrane protein 167A                                    |
| hsa-miR-200b-3p | <a href="#">HNRNPH3</a>        | heterogeneous nuclear ribonucleoprotein H3                    |
| hsa-miR-200b-3p | <a href="#">MTFR1</a>          | mitochondrial fission regulator 1                             |
| hsa-miR-200b-3p | <a href="#">RBL1</a>           | RB transcriptional corepressor like 1                         |
| hsa-miR-200b-3p | <a href="#">ELL</a>            | elongation factor for RNA polymerase II                       |
| hsa-miR-200b-3p | <a href="#">TBX22</a>          | T-box 22                                                      |
| hsa-miR-200b-3p | <a href="#">RLF</a>            | rearranged L-myc fusion                                       |



|                 |                         |                                                        |
|-----------------|-------------------------|--------------------------------------------------------|
| hsa-miR-200b-3p | <a href="#">CNTN4</a>   | contactin 4                                            |
| hsa-miR-200b-3p | <a href="#">C6orf62</a> | chromosome 6 open reading frame 62                     |
| hsa-miR-200b-3p | <a href="#">CADM2</a>   | cell adhesion molecule 2                               |
| hsa-miR-200b-3p | <a href="#">CNOT6L</a>  | CCR4-NOT transcription complex subunit 6 like          |
| hsa-miR-200b-3p | <a href="#">PMM1</a>    | phosphomannomutase 1                                   |
| hsa-miR-200b-3p | <a href="#">DIRAS2</a>  | DIRAS family GTPase 2                                  |
| hsa-miR-200b-3p | <a href="#">SHC4</a>    | SHC adaptor protein 4                                  |
| hsa-miR-200b-3p | <a href="#">TJAP1</a>   | tight junction associated protein 1                    |
| hsa-miR-200b-3p | <a href="#">RBM12B</a>  | RNA binding motif protein 12B                          |
| hsa-miR-200b-3p | <a href="#">LATS1</a>   | large tumor suppressor kinase 1                        |
| hsa-miR-200b-3p | <a href="#">EIF5A2</a>  | eukaryotic translation initiation factor 5A2           |
| hsa-miR-200b-3p | <a href="#">UGCG</a>    | UDP-glucose ceramide glucosyltransferase               |
| hsa-miR-200b-3p | <a href="#">RAB33B</a>  | RAB33B, member RAS oncogene family                     |
| hsa-miR-200b-3p | <a href="#">ZNF605</a>  | zinc finger protein 605                                |
| hsa-miR-200b-3p | <a href="#">PLOD2</a>   | procollagen-lysine,2-oxoglutarate 5-dioxygenase 2      |
| hsa-miR-200b-3p | <a href="#">PHLDB1</a>  | pleckstrin homology like domain family B member 1      |
| hsa-miR-200b-3p | <a href="#">SRSF1</a>   | serine and arginine rich splicing factor 1             |
| hsa-miR-200b-3p | <a href="#">RPL22L1</a> | ribosomal protein L22 like 1                           |
| hsa-miR-200b-3p | <a href="#">ARFGEF3</a> | ARFGEF family member 3                                 |
| hsa-miR-200b-3p | <a href="#">CYP1B1</a>  | cytochrome P450 family 1 subfamily B member 1          |
| hsa-miR-200b-3p | <a href="#">NGEF</a>    | neuronal guanine nucleotide exchange factor            |
| hsa-miR-200b-3p | <a href="#">TSTD3</a>   | thiosulfate sulfurtransferase like domain containing 3 |
| hsa-miR-200b-3p | <a href="#">EFHC2</a>   | EF-hand domain containing 2                            |
| hsa-miR-200b-3p | <a href="#">PAK3</a>    | p21 (RAC1) activated kinase 3                          |
| hsa-miR-200b-3p | <a href="#">STON2</a>   | stonin 2                                               |
| hsa-miR-200b-3p | <a href="#">SLC23A2</a> | solute carrier family 23 member 2                      |
| hsa-miR-200b-3p | <a href="#">KLRF1</a>   | killer cell lectin like receptor F1                    |
| hsa-miR-200b-3p | <a href="#">ESM1</a>    | endothelial cell specific molecule 1                   |
| hsa-miR-200b-3p | <a href="#">MED6</a>    | mediator complex subunit 6                             |
| hsa-miR-200b-3p | <a href="#">SLC6A17</a> | solute carrier family 6 member 17                      |
| hsa-miR-200b-3p | <a href="#">PPP2R2C</a> | protein phosphatase 2 regulatory subunit Bgamma        |
| hsa-miR-200b-3p | <a href="#">FAR2</a>    | fatty acyl-CoA reductase 2                             |
| hsa-miR-200b-3p | <a href="#">ZNF652</a>  | zinc finger protein 652                                |
| hsa-miR-200b-3p | <a href="#">LIN28B</a>  | lin-28 homolog B                                       |
| hsa-miR-200b-3p | <a href="#">LCOR</a>    | ligand dependent nuclear receptor corepressor          |
| hsa-miR-200b-3p | <a href="#">CALCR</a>   | calcitonin receptor                                    |
| hsa-miR-200b-3p | <a href="#">ALDH1A3</a> | aldehyde dehydrogenase 1 family member A3              |
| hsa-miR-200b-3p | <a href="#">UBN2</a>    | ubiquitin 2                                            |
| hsa-miR-200b-3p | <a href="#">BTBD18</a>  | BTB domain containing 18                               |
| hsa-miR-200b-3p | <a href="#">PDLIM5</a>  | PDZ and LIM domain 5                                   |
| hsa-miR-200b-3p | <a href="#">PAK5</a>    | p21 (RAC1) activated kinase 5                          |
| hsa-miR-200b-3p | <a href="#">MSR1</a>    | macrophage scavenger receptor 1                        |
| hsa-miR-200b-3p | <a href="#">GPX6</a>    | glutathione peroxidase 6                               |
| hsa-miR-200b-3p | <a href="#">HIPK2</a>   | homeodomain interacting protein kinase 2               |
| hsa-miR-200b-3p | <a href="#">SIRPA</a>   | signal regulatory protein alpha                        |

|                 |                           |                                                               |
|-----------------|---------------------------|---------------------------------------------------------------|
| hsa-miR-200b-3p | <a href="#">SLC35F4</a>   | solute carrier family 35 member F4                            |
| hsa-miR-200b-3p | <a href="#">JMY</a>       | junction mediating and regulatory protein, p53 cofactor       |
| hsa-miR-200b-3p | <a href="#">ASF1A</a>     | anti-silencing function 1A histone chaperone                  |
| hsa-miR-200b-3p | <a href="#">INPP4A</a>    | inositol polyphosphate-4-phosphatase type I A                 |
| hsa-miR-200b-3p | <a href="#">SNAI2</a>     | snail family transcriptional repressor 2                      |
| hsa-miR-200b-3p | <a href="#">LPIN1</a>     | lipin 1                                                       |
| hsa-miR-200b-3p | <a href="#">TERF1</a>     | telomeric repeat binding factor 1                             |
| hsa-miR-200b-3p | <a href="#">RUNX1T1</a>   | RUNX1 translocation partner 1                                 |
| hsa-miR-200b-3p | <a href="#">TAOK1</a>     | TAO kinase 1                                                  |
| hsa-miR-200b-3p | <a href="#">TXLNG</a>     | taxilin gamma                                                 |
| hsa-miR-200b-3p | <a href="#">NPNT</a>      | nephronectin                                                  |
| hsa-miR-200b-3p | <a href="#">MAPK1IP1L</a> | mitogen-activated protein kinase 1 interacting protein 1 like |
| hsa-miR-200b-3p | <a href="#">SH3PXD2A</a>  | SH3 and PX domains 2A                                         |
| hsa-miR-200b-3p | <a href="#">ZNF555</a>    | zinc finger protein 555                                       |
| hsa-miR-200b-3p | <a href="#">ASXL3</a>     | ASXL transcriptional regulator 3                              |
| hsa-miR-200b-3p | <a href="#">PCNP</a>      | PEST proteolytic signal containing nuclear protein            |
| hsa-miR-200b-3p | <a href="#">SHOC1</a>     | shortage in chiasmata 1                                       |
| hsa-miR-200b-3p | <a href="#">ZNF181</a>    | zinc finger protein 181                                       |
| hsa-miR-200b-3p | <a href="#">PIP4K2B</a>   | phosphatidylinositol-5-phosphate 4-kinase type 2 beta         |
| hsa-miR-200b-3p | <a href="#">PLEKHM3</a>   | pleckstrin homology domain containing M3                      |
| hsa-miR-200b-3p | <a href="#">NCOA3</a>     | nuclear receptor coactivator 3                                |
| hsa-miR-200b-3p | <a href="#">ARHGAP19</a>  | Rho GTPase activating protein 19                              |
| hsa-miR-200b-3p | <a href="#">FXR2</a>      | FMR1 autosomal homolog 2                                      |
| hsa-miR-200b-3p | <a href="#">SNX13</a>     | sorting nexin 13                                              |
| hsa-miR-200b-3p | <a href="#">PLCG1</a>     | phospholipase C gamma 1                                       |
| hsa-miR-200b-3p | <a href="#">PHF21A</a>    | PHD finger protein 21A                                        |
| hsa-miR-200b-3p | <a href="#">GIN1</a>      | gypsy retrotransposon integrase 1                             |
| hsa-miR-200b-3p | <a href="#">TRAM1L1</a>   | translocation associated membrane protein 1 like 1            |
| hsa-miR-200b-3p | <a href="#">THAP5</a>     | THAP domain containing 5                                      |
| hsa-miR-200b-3p | <a href="#">SNAPC1</a>    | small nuclear RNA activating complex polypeptide 1            |
| hsa-miR-200b-3p | <a href="#">C2orf49</a>   | chromosome 2 open reading frame 49                            |
| hsa-miR-200b-3p | <a href="#">TPCN1</a>     | two pore segment channel 1                                    |
| hsa-miR-200b-3p | <a href="#">PTS</a>       | 6-pyruvoyltetrahydropterin synthase                           |
| hsa-miR-200b-3p | <a href="#">PARD6B</a>    | par-6 family cell polarity regulator beta                     |
| hsa-miR-200b-3p | <a href="#">CDK15</a>     | cyclin dependent kinase 15                                    |
| hsa-miR-200b-3p | <a href="#">THRB</a>      | thyroid hormone receptor beta                                 |
| hsa-miR-200b-3p | <a href="#">MPP4</a>      | membrane palmitoylated protein 4                              |
| hsa-miR-200b-3p | <a href="#">RELN</a>      | reelin                                                        |
| hsa-miR-200b-3p | <a href="#">ZNF516</a>    | zinc finger protein 516                                       |
| hsa-miR-200b-3p | <a href="#">KLK7</a>      | kallikrein related peptidase 7                                |
| hsa-miR-200b-3p | <a href="#">PAX6</a>      | paired box 6                                                  |
| hsa-miR-200b-3p | <a href="#">KLHL31</a>    | kelch like family member 31                                   |
| hsa-miR-200b-3p | <a href="#">NCOR2</a>     | nuclear receptor corepressor 2                                |
| hsa-miR-200b-3p | <a href="#">KCTD15</a>    | potassium channel tetramerization domain containing 15        |

|                 |                          |                                                                  |
|-----------------|--------------------------|------------------------------------------------------------------|
| hsa-miR-200b-3p | <a href="#">PSPH</a>     | phosphoserine phosphatase                                        |
| hsa-miR-200b-3p | <a href="#">PIN1</a>     | peptidylprolyl cis/trans isomerase, NIMA-interacting 1           |
| hsa-miR-200b-3p | <a href="#">CHD2</a>     | chromodomain helicase DNA binding protein 2                      |
| hsa-miR-200b-3p | <a href="#">MAP1LC3B</a> | microtubule associated protein 1 light chain 3 beta              |
| hsa-miR-200b-3p | <a href="#">HPS5</a>     | HPS5, biogenesis of lysosomal organelles complex 2 subunit 2     |
| hsa-miR-200b-3p | <a href="#">TMCC1</a>    | transmembrane and coiled-coil domain family 1                    |
| hsa-miR-200b-3p | <a href="#">PLPPR1</a>   | phospholipid phosphatase related 1                               |
| hsa-miR-200b-3p | <a href="#">LYRM2</a>    | LYR motif containing 2                                           |
| hsa-miR-200b-3p | <a href="#">FAM169A</a>  | family with sequence similarity 169 member A                     |
| hsa-miR-200b-3p | <a href="#">ITPR1</a>    | inositol 1,4,5-trisphosphate receptor type 1                     |
| hsa-miR-200b-3p | <a href="#">HEG1</a>     | heart development protein with EGF like domains 1                |
| hsa-miR-200b-3p | <a href="#">CHST9</a>    | carbohydrate sulfotransferase 9                                  |
| hsa-miR-200b-3p | <a href="#">DMRT2</a>    | doublesex and mab-3 related transcription factor 2               |
| hsa-miR-200b-3p | <a href="#">PRKAR2B</a>  | protein kinase cAMP-dependent type II regulatory subunit beta    |
| hsa-miR-200b-3p | <a href="#">TIP1</a>     | tight junction protein 1                                         |
| hsa-miR-200b-3p | <a href="#">FAM218A</a>  | family with sequence similarity 218 member A                     |
| hsa-miR-200b-3p | <a href="#">IQSEC1</a>   | IQ motif and Sec7 domain 1                                       |
| hsa-miR-200b-3p | <a href="#">HS6ST2</a>   | heparan sulfate 6-O-sulfotransferase 2                           |
| hsa-miR-200b-3p | <a href="#">MYCN</a>     | MYCN proto-oncogene, bHLH transcription factor                   |
| hsa-miR-200b-3p | <a href="#">LY75</a>     | lymphocyte antigen 75                                            |
| hsa-miR-200b-3p | <a href="#">REV3L</a>    | REV3 like, DNA directed polymerase zeta catalytic subunit        |
| hsa-miR-200b-3p | <a href="#">ARIH2</a>    | ariadne RBR E3 ubiquitin protein ligase 2                        |
| hsa-miR-200b-3p | <a href="#">CHM</a>      | CHM, Rab escort protein 1                                        |
| hsa-miR-200b-3p | <a href="#">CSRNP3</a>   | cysteine and serine rich nuclear protein 3                       |
| hsa-miR-200b-3p | <a href="#">KCNK2</a>    | potassium two pore domain channel subfamily K member 2           |
| hsa-miR-200b-3p | <a href="#">MARCH1</a>   | membrane associated ring-CH-type finger 1                        |
| hsa-miR-200b-3p | <a href="#">ZNF274</a>   | zinc finger protein 274                                          |
| hsa-miR-200b-3p | <a href="#">NEGR1</a>    | neuronal growth regulator 1                                      |
| hsa-miR-200b-3p | <a href="#">FCAR</a>     | Fc fragment of IgA receptor                                      |
| hsa-miR-200b-3p | <a href="#">FAM3B</a>    | family with sequence similarity 3 member B                       |
| hsa-miR-200b-3p | <a href="#">CFLAR</a>    | CASP8 and FADD like apoptosis regulator                          |
| hsa-miR-200b-3p | <a href="#">PTBP1</a>    | polypyrimidine tract binding protein 1                           |
| hsa-miR-200b-3p | <a href="#">FAM107B</a>  | family with sequence similarity 107 member B                     |
| hsa-miR-200b-3p | <a href="#">LRP4</a>     | LDL receptor related protein 4                                   |
| hsa-miR-200b-3p | <a href="#">F2RL2</a>    | coagulation factor II thrombin receptor like 2                   |
| hsa-miR-200b-3p | <a href="#">MTCP1</a>    | mature T cell proliferation 1                                    |
| hsa-miR-200b-3p | <a href="#">OTUD6B</a>   | OTU domain containing 6B                                         |
| hsa-miR-200b-3p | <a href="#">ZNF566</a>   | zinc finger protein 566                                          |
| hsa-miR-200b-3p | <a href="#">CA5B</a>     | carbonic anhydrase 5B                                            |
| hsa-miR-200b-3p | <a href="#">TRPV3</a>    | transient receptor potential cation channel subfamily V member 3 |
| hsa-miR-200b-3p | <a href="#">DCAF5</a>    | DDB1 and CUL4 associated factor 5                                |

|                 |                          |                                                                  |
|-----------------|--------------------------|------------------------------------------------------------------|
| hsa-miR-200b-3p | <a href="#">BASP1</a>    | brain abundant membrane attached signal protein 1                |
| hsa-miR-200b-3p | <a href="#">GSKIP</a>    | GSK3B interacting protein                                        |
| hsa-miR-200b-3p | <a href="#">TRPC3</a>    | transient receptor potential cation channel subfamily C member 3 |
| hsa-miR-200b-3p | <a href="#">PRRC2C</a>   | proline rich coiled-coil 2C                                      |
| hsa-miR-200b-3p | <a href="#">VPS13A</a>   | vacuolar protein sorting 13 homolog A                            |
| hsa-miR-200b-3p | <a href="#">AP1M1</a>    | adaptor related protein complex 1 subunit mu 1                   |
| hsa-miR-200b-3p | <a href="#">CNTD1</a>    | cyclin N-terminal domain containing 1                            |
| hsa-miR-200b-3p | <a href="#">SCOC</a>     | short coiled-coil protein                                        |
| hsa-miR-200b-3p | <a href="#">BCLAF3</a>   | BCLAF1 and THRAP3 family member 3                                |
| hsa-miR-200b-3p | <a href="#">TM4SF18</a>  | transmembrane 4 L six family member 18                           |
| hsa-miR-200b-3p | <a href="#">SMAD5</a>    | SMAD family member 5                                             |
| hsa-miR-200b-3p | <a href="#">GFI1</a>     | growth factor independent 1 transcriptional repressor            |
| hsa-miR-200b-3p | <a href="#">ZNF365</a>   | zinc finger protein 365                                          |
| hsa-miR-200b-3p | <a href="#">ATP11A</a>   | ATPase phospholipid transporting 11A                             |
| hsa-miR-200b-3p | <a href="#">NLRP11</a>   | NLR family pyrin domain containing 11                            |
| hsa-miR-200b-3p | <a href="#">CDK12</a>    | cyclin dependent kinase 12                                       |
| hsa-miR-200b-3p | <a href="#">MUL1</a>     | mitochondrial E3 ubiquitin protein ligase 1                      |
| hsa-miR-200b-3p | <a href="#">WSB1</a>     | WD repeat and SOCS box containing 1                              |
| hsa-miR-200b-3p | <a href="#">PSMF1</a>    | proteasome inhibitor subunit 1                                   |
| hsa-miR-200b-3p | <a href="#">CDHR1</a>    | cadherin related family member 1                                 |
| hsa-miR-200b-3p | <a href="#">RIF1</a>     | replication timing regulatory factor 1                           |
| hsa-miR-200b-3p | <a href="#">HNRNPH2</a>  | heterogeneous nuclear ribonucleoprotein H2                       |
| hsa-miR-200b-3p | <a href="#">ZNF366</a>   | zinc finger protein 366                                          |
| hsa-miR-200b-3p | <a href="#">NAA50</a>    | N(alpha)-acetyltransferase 50, NatE catalytic subunit            |
| hsa-miR-200b-3p | <a href="#">SUB1</a>     | SUB1 homolog, transcriptional regulator                          |
| hsa-miR-200b-3p | <a href="#">C22orf39</a> | chromosome 22 open reading frame 39                              |
| hsa-miR-200b-3p | <a href="#">SPIDR</a>    | scaffold protein involved in DNA repair                          |
| hsa-miR-200b-3p | <a href="#">NIP7</a>     | NIP7, nucleolar pre-rRNA processing protein                      |
| hsa-miR-200b-3p | <a href="#">TGFB3</a>    | transforming growth factor beta receptor 3                       |
| hsa-miR-200b-3p | <a href="#">TMEM229B</a> | transmembrane protein 229B                                       |
| hsa-miR-200b-3p | <a href="#">UTP25</a>    | UTP25, small subunit processor component                         |
| hsa-miR-200b-3p | <a href="#">PI15</a>     | peptidase inhibitor 15                                           |
| hsa-miR-200b-3p | <a href="#">IRS2</a>     | insulin receptor substrate 2                                     |
| hsa-miR-200b-3p | <a href="#">ANKRD28</a>  | ankyrin repeat domain 28                                         |
| hsa-miR-200b-3p | <a href="#">WDR45B</a>   | WD repeat domain 45B                                             |
| hsa-miR-200b-3p | <a href="#">C21orf91</a> | chromosome 21 open reading frame 91                              |
| hsa-miR-200b-3p | <a href="#">FGD1</a>     | FYVE, RhoGEF and PH domain containing 1                          |
| hsa-miR-200b-3p | <a href="#">FMR1</a>     | fragile X mental retardation 1                                   |
| hsa-miR-200b-3p | <a href="#">NFASC</a>    | neurofascin                                                      |
| hsa-miR-200b-3p | <a href="#">RFC3</a>     | replication factor C subunit 3                                   |
| hsa-miR-200b-3p | <a href="#">RNASEL</a>   | ribonuclease L                                                   |
| hsa-miR-200b-3p | <a href="#">OSR1</a>     | odd-skipped related transcription factor 1                       |
| hsa-miR-200b-3p | <a href="#">FRS2</a>     | fibroblast growth factor receptor substrate 2                    |
| hsa-miR-200b-3p | <a href="#">C2orf15</a>  | chromosome 2 open reading frame 15                               |

|                 |                          |                                                              |
|-----------------|--------------------------|--------------------------------------------------------------|
| hsa-miR-200b-3p | <a href="#">NR2C1</a>    | nuclear receptor subfamily 2 group C member 1                |
| hsa-miR-200b-3p | <a href="#">ING5</a>     | inhibitor of growth family member 5                          |
| hsa-miR-200b-3p | <a href="#">PENK</a>     | proenkephalin                                                |
| hsa-miR-200b-3p | <a href="#">SOCS6</a>    | suppressor of cytokine signaling 6                           |
| hsa-miR-200b-3p | <a href="#">SEPHS1</a>   | selenophosphate synthetase 1                                 |
| hsa-miR-200b-3p | <a href="#">NEO1</a>     | neogenin 1                                                   |
| hsa-miR-200b-3p | <a href="#">TP53INP1</a> | tumor protein p53 inducible nuclear protein 1                |
| hsa-miR-200b-3p | <a href="#">TMEM43</a>   | transmembrane protein 43                                     |
| hsa-miR-200b-3p | <a href="#">RBM8A</a>    | RNA binding motif protein 8A                                 |
| hsa-miR-200b-3p | <a href="#">PLXNA4</a>   | plexin A4                                                    |
| hsa-miR-200b-3p | <a href="#">RBM46</a>    | RNA binding motif protein 46                                 |
| hsa-miR-200b-3p | <a href="#">GRIP1</a>    | glutamate receptor interacting protein 1                     |
| hsa-miR-200b-3p | <a href="#">MTAP</a>     | methylthioadenosine phosphorylase                            |
| hsa-miR-200b-3p | <a href="#">NOC3L</a>    | NOC3 like DNA replication regulator                          |
| hsa-miR-200b-3p | <a href="#">GATA2</a>    | GATA binding protein 2                                       |
| hsa-miR-200b-3p | <a href="#">EGLN3</a>    | egl-9 family hypoxia inducible factor 3                      |
| hsa-miR-200b-3p | <a href="#">RASGEF1B</a> | RasGEF domain family member 1B                               |
| hsa-miR-200b-3p | <a href="#">HBS1L</a>    | HBS1 like translational GTPase                               |
| hsa-miR-200b-3p | <a href="#">RAB30</a>    | RAB30, member RAS oncogene family                            |
| hsa-miR-200b-3p | <a href="#">NR2C2</a>    | nuclear receptor subfamily 2 group C member 2                |
| hsa-miR-200b-3p | <a href="#">SOD2</a>     | superoxide dismutase 2                                       |
| hsa-miR-200b-3p | <a href="#">ZNF330</a>   | zinc finger protein 330                                      |
| hsa-miR-200b-3p | <a href="#">TAF3</a>     | TATA-box binding protein associated factor 3                 |
| hsa-miR-200b-3p | <a href="#">ZNF260</a>   | zinc finger protein 260                                      |
| hsa-miR-200b-3p | <a href="#">MLLT10</a>   | MLLT10, histone lysine methyltransferase DOT1L cofactor      |
| hsa-miR-200b-3p | <a href="#">ITPRID2</a>  | ITPR interacting domain containing 2                         |
| hsa-miR-200b-3p | <a href="#">NPR3</a>     | natriuretic peptide receptor 3                               |
| hsa-miR-200b-3p | <a href="#">CRYZ</a>     | crystallin zeta                                              |
| hsa-miR-200b-3p | <a href="#">ONECUT2</a>  | one cut homeobox 2                                           |
| hsa-miR-200b-3p | <a href="#">YOD1</a>     | YOD1 deubiquitinase                                          |
| hsa-miR-200b-3p | <a href="#">LRRTM3</a>   | leucine rich repeat transmembrane neuronal 3                 |
| hsa-miR-200b-3p | <a href="#">ARPP21</a>   | cAMP regulated phosphoprotein 21                             |
| hsa-miR-200b-3p | <a href="#">CDK1</a>     | cyclin dependent kinase 1                                    |
| hsa-miR-200b-3p | <a href="#">NAA16</a>    | N(alpha)-acetyltransferase 16, NatA auxiliary subunit        |
| hsa-miR-200b-3p | <a href="#">TMEM123</a>  | transmembrane protein 123                                    |
| hsa-miR-200b-3p | <a href="#">DYRK2</a>    | dual specificity tyrosine phosphorylation regulated kinase 2 |
| hsa-miR-200b-3p | <a href="#">ACTC1</a>    | actin, alpha, cardiac muscle 1                               |
| hsa-miR-200b-3p | <a href="#">FAM160B1</a> | family with sequence similarity 160 member B1                |
| hsa-miR-200b-3p | <a href="#">UFSP2</a>    | UFM1 specific peptidase 2                                    |
| hsa-miR-200b-3p | <a href="#">ASPH</a>     | aspartate beta-hydroxylase                                   |
| hsa-miR-200b-3p | <a href="#">FUBP1</a>    | far upstream element binding protein 1                       |
| hsa-miR-200b-3p | <a href="#">HIF1AN</a>   | hypoxia inducible factor 1 subunit alpha inhibitor           |
| hsa-miR-200b-3p | <a href="#">IL24</a>     | interleukin 24                                               |

|                 |                                |                                                        |
|-----------------|--------------------------------|--------------------------------------------------------|
| hsa-miR-200b-3p | <a href="#">DCX</a>            | doublecortin                                           |
| hsa-miR-200b-3p | <a href="#">CGGBP1</a>         | CGG triplet repeat binding protein 1                   |
| hsa-miR-200b-3p | <a href="#">ST3GAL5</a>        | ST3 beta-galactoside alpha-2,3-sialyltransferase 5     |
| hsa-miR-200b-3p | <a href="#">CLIP2</a>          | CAP-Gly domain containing linker protein 2             |
| hsa-miR-200b-3p | <a href="#">CD58</a>           | CD58 molecule                                          |
| hsa-miR-200b-3p | <a href="#">ZNF550</a>         | zinc finger protein 550                                |
| hsa-miR-200b-3p | <a href="#">CDK2</a>           | cyclin dependent kinase 2                              |
| hsa-miR-200b-3p | <a href="#">TADA2B</a>         | transcriptional adaptor 2B                             |
| hsa-miR-200b-3p | <a href="#">FBXL16</a>         | F-box and leucine rich repeat protein 16               |
| hsa-miR-200b-3p | <a href="#">TPD52L1</a>        | TPD52 like 1                                           |
| hsa-miR-200b-3p | <a href="#">GLS</a>            | glutaminase                                            |
| hsa-miR-200b-3p | <a href="#">SIRT1</a>          | sirtuin 1                                              |
| hsa-miR-200b-3p | <a href="#">SPART</a>          | spartin                                                |
| hsa-miR-200b-3p | <a href="#">ATMIN</a>          | ATM interactor                                         |
| hsa-miR-200b-3p | <a href="#">C2orf72</a>        | chromosome 2 open reading frame 72                     |
| hsa-miR-200b-3p | <a href="#">C2orf68</a>        | chromosome 2 open reading frame 68                     |
| hsa-miR-200b-3p | <a href="#">BUB1B-PAK6</a>     | BUB1B-PAK6 readthrough                                 |
| hsa-miR-200b-3p | <a href="#">CLCF1</a>          | cardiotrophin like cytokine factor 1                   |
| hsa-miR-200b-3p | <a href="#">CSTF3</a>          | cleavage stimulation factor subunit 3                  |
| hsa-miR-200b-3p | <a href="#">ADIPOQ</a>         | adiponectin, C1Q and collagen domain containing        |
| hsa-miR-200b-3p | <a href="#">CLCC1</a>          | chloride channel CLIC like 1                           |
| hsa-miR-200b-3p | <a href="#">BORCS7</a>         | BLOC-1 related complex subunit 7                       |
| hsa-miR-200b-3p | <a href="#">SERF2</a>          | small EDRK-rich factor 2                               |
| hsa-miR-200b-3p | <a href="#">NPAP1</a>          | nuclear pore associated protein 1                      |
| hsa-miR-200b-3p | <a href="#">TREM1</a>          | triggering receptor expressed on myeloid cells 1       |
| hsa-miR-200b-3p | <a href="#">ASXL1</a>          | ASXL transcriptional regulator 1                       |
| hsa-miR-200b-3p | <a href="#">TRIM2</a>          | tripartite motif containing 2                          |
| hsa-miR-200b-3p | <a href="#">RPL36A-HNRNPH2</a> | RPL36A-HNRNPH2 readthrough                             |
| hsa-miR-200b-3p | <a href="#">PRPF38A</a>        | pre-mRNA processing factor 38A                         |
| hsa-miR-200b-3p | <a href="#">KLHL14</a>         | kelch like family member 14                            |
| hsa-miR-200b-3p | <a href="#">RALGPS2</a>        | Ral GEF with PH domain and SH3 binding motif 2         |
| hsa-miR-200b-3p | <a href="#">LGSN</a>           | lengsin, lens protein with glutamine synthetase domain |
| hsa-miR-200b-3p | <a href="#">PAN3</a>           | poly(A) specific ribonuclease subunit PAN3             |
| hsa-miR-200b-3p | <a href="#">SGCB</a>           | sarcoglycan beta                                       |
| hsa-miR-200b-3p | <a href="#">MEGF10</a>         | multiple EGF like domains 10                           |
| hsa-miR-200b-3p | <a href="#">SLC16A7</a>        | solute carrier family 16 member 7                      |
| hsa-miR-200b-3p | <a href="#">CCSER1</a>         | coiled-coil serine rich protein 1                      |
| hsa-miR-200b-3p | <a href="#">BBS12</a>          | Bardet-Biedl syndrome 12                               |
| hsa-miR-200b-3p | <a href="#">LRRC34</a>         | leucine rich repeat containing 34                      |
| hsa-miR-200b-3p | <a href="#">USF3</a>           | upstream transcription factor family member 3          |
| hsa-miR-200b-3p | <a href="#">CASC4</a>          | cancer susceptibility 4                                |
| hsa-miR-200b-3p | <a href="#">ITSN1</a>          | intersectin 1                                          |
| hsa-miR-200b-3p | <a href="#">ERBIN</a>          | erbB2 interacting protein                              |
| hsa-miR-200b-3p | <a href="#">XRN2</a>           | 5'-3' exoribonuclease 2                                |



|                 |                          |                                                         |
|-----------------|--------------------------|---------------------------------------------------------|
| hsa-miR-200b-3p | <a href="#">CTNNA3</a>   | catenin alpha 3                                         |
| hsa-miR-200b-3p | <a href="#">CREB5</a>    | cAMP responsive element binding protein 5               |
| hsa-miR-200b-3p | <a href="#">PPP1R12B</a> | protein phosphatase 1 regulatory subunit 12B            |
| hsa-miR-200b-3p | <a href="#">MDM4</a>     | MDM4, p53 regulator                                     |
| hsa-miR-200b-3p | <a href="#">XKRY2</a>    | XK related, Y-linked 2                                  |
| hsa-miR-200b-3p | <a href="#">RBMXL2</a>   | RBMX like 2                                             |
| hsa-miR-200b-3p | <a href="#">TENM1</a>    | teneurin transmembrane protein 1                        |
| hsa-miR-200b-3p | <a href="#">BHLHE41</a>  | basic helix-loop-helix family member e41                |
| hsa-miR-200b-3p | <a href="#">SNTB2</a>    | syntrophin beta 2                                       |
| hsa-miR-200b-3p | <a href="#">ATAT1</a>    | alpha tubulin acetyltransferase 1                       |
| hsa-miR-200b-3p | <a href="#">SSH2</a>     | slingshot protein phosphatase 2                         |
| hsa-miR-200b-3p | <a href="#">XKRY</a>     | XK related, Y-linked                                    |
| hsa-miR-200b-3p | <a href="#">STAM</a>     | signal transducing adaptor molecule                     |
| hsa-miR-200b-3p | <a href="#">KIF13A</a>   | kinesin family member 13A                               |
| hsa-miR-200b-3p | <a href="#">PIGM</a>     | phosphatidylinositol glycan anchor biosynthesis class M |
| hsa-miR-200b-3p | <a href="#">LSM8</a>     | LSM8 homolog, U6 small nuclear RNA associated           |
| hsa-miR-200b-3p | <a href="#">ANKRD34B</a> | ankyrin repeat domain 34B                               |
| hsa-miR-200b-3p | <a href="#">CFAP97</a>   | cilia and flagella associated protein 97                |
| hsa-miR-200b-3p | <a href="#">CKLF</a>     | chemokine like factor                                   |
| hsa-miR-200b-3p | <a href="#">RBBP4</a>    | RB binding protein 4, chromatin remodeling factor       |
| hsa-miR-200b-3p | <a href="#">ALPI</a>     | alkaline phosphatase, intestinal                        |
| hsa-miR-200b-3p | <a href="#">TMEM26</a>   | transmembrane protein 26                                |
| hsa-miR-200b-3p | <a href="#">DARS</a>     | aspartyl-tRNA synthetase                                |
| hsa-miR-200b-3p | <a href="#">GLIS2</a>    | GLIS family zinc finger 2                               |
| hsa-miR-200b-3p | <a href="#">COL4A3</a>   | collagen type IV alpha 3 chain                          |
| hsa-miR-200b-3p | <a href="#">MOSPD2</a>   | motile sperm domain containing 2                        |
| hsa-miR-200b-3p | <a href="#">CA3</a>      | carbonic anhydrase 3                                    |
| hsa-miR-200b-3p | <a href="#">TOR1AIP2</a> | torsin 1A interacting protein 2                         |
| hsa-miR-200b-3p | <a href="#">TARDBP</a>   | TAR DNA binding protein                                 |
| hsa-miR-200b-3p | <a href="#">LRIG1</a>    | leucine rich repeats and immunoglobulin like domains 1  |
| hsa-miR-200b-3p | <a href="#">FAM217B</a>  | family with sequence similarity 217 member B            |
| hsa-miR-200b-3p | <a href="#">WWP2</a>     | WW domain containing E3 ubiquitin protein ligase 2      |
| hsa-miR-200b-3p | <a href="#">PM20D2</a>   | peptidase M20 domain containing 2                       |
| hsa-miR-200b-3p | <a href="#">CEBPD</a>    | CCAAT enhancer binding protein delta                    |
| hsa-miR-200b-3p | <a href="#">LRAT</a>     | lecithin retinol acyltransferase                        |
| hsa-miR-200b-3p | <a href="#">NALCN</a>    | sodium leak channel, non-selective                      |
| hsa-miR-200b-3p | <a href="#">NEK9</a>     | NIMA related kinase 9                                   |
| hsa-miR-200b-3p | <a href="#">TNFSF8</a>   | TNF superfamily member 8                                |
| hsa-miR-200b-3p | <a href="#">RNGTT</a>    | RNA guanylyltransferase and 5'-phosphatase              |
| hsa-miR-200b-3p | <a href="#">IGSF3</a>    | immunoglobulin superfamily member 3                     |
| hsa-miR-200b-3p | <a href="#">LDB3</a>     | LIM domain binding 3                                    |
| hsa-miR-200b-3p | <a href="#">SNX1</a>     | sorting nexin 1                                         |
| hsa-miR-200b-3p | <a href="#">KAT2B</a>    | lysine acetyltransferase 2B                             |
| hsa-miR-200b-3p | <a href="#">SCN9A</a>    | sodium voltage-gated channel alpha subunit 9            |

|                 |                           |                                                                                                                 |
|-----------------|---------------------------|-----------------------------------------------------------------------------------------------------------------|
| hsa-miR-200b-3p | <a href="#">SMARCA1</a>   | SWI/SNF-related, matrix-associated actin-dependent regulator of chromatin, subfamily a, containing DEAD/H box 1 |
| hsa-miR-200b-3p | <a href="#">GABPB1</a>    | GA binding protein transcription factor subunit beta 1                                                          |
| hsa-miR-200b-3p | <a href="#">NUP153</a>    | nucleoporin 153                                                                                                 |
| hsa-miR-200b-3p | <a href="#">ABRA</a>      | actin binding Rho activating protein                                                                            |
| hsa-miR-200b-3p | <a href="#">ERI1</a>      | exoribonuclease 1                                                                                               |
| hsa-miR-200b-3p | <a href="#">GABRA6</a>    | gamma-aminobutyric acid type A receptor alpha6 subunit                                                          |
| hsa-miR-200b-3p | <a href="#">TUBB3</a>     | tubulin beta 3 class III                                                                                        |
| hsa-miR-200b-3p | <a href="#">CPXCR1</a>    | CPX chromosome region, candidate 1                                                                              |
| hsa-miR-200b-3p | <a href="#">EDNRA</a>     | endothelin receptor type A                                                                                      |
| hsa-miR-200b-3p | <a href="#">BDKRB2</a>    | bradykinin receptor B2                                                                                          |
| hsa-miR-200b-3p | <a href="#">SHISA2</a>    | shisa family member 2                                                                                           |
| hsa-miR-200b-3p | <a href="#">GPR85</a>     | G protein-coupled receptor 85                                                                                   |
| hsa-miR-200b-3p | <a href="#">TNFRSF11B</a> | TNF receptor superfamily member 11b                                                                             |
| hsa-miR-200b-3p | <a href="#">ZNF674</a>    | zinc finger protein 674                                                                                         |
| hsa-miR-200b-3p | <a href="#">PDPK1</a>     | 3-phosphoinositide dependent protein kinase 1                                                                   |
| hsa-miR-200b-3p | <a href="#">VTI1A</a>     | vesicle transport through interaction with t-SNAREs 1A                                                          |
| hsa-miR-200b-3p | <a href="#">SLC25A30</a>  | solute carrier family 25 member 30                                                                              |
| hsa-miR-200b-3p | <a href="#">PARG</a>      | poly(ADP-ribose) glycohydrolase                                                                                 |
| hsa-miR-200b-3p | <a href="#">TMEM38B</a>   | transmembrane protein 38B                                                                                       |
| hsa-miR-200b-3p | <a href="#">TMEM14A</a>   | transmembrane protein 14A                                                                                       |
| hsa-miR-200b-3p | <a href="#">PIK3CB</a>    | phosphatidylinositol-4,5-bisphosphate 3-kinase catalytic subunit beta                                           |
| hsa-miR-200b-3p | <a href="#">TMED4</a>     | transmembrane p24 trafficking protein 4                                                                         |
| hsa-miR-200b-3p | <a href="#">HLF</a>       | HLF, PAR bZIP transcription factor                                                                              |
| hsa-miR-200b-3p | <a href="#">SLC15A2</a>   | solute carrier family 15 member 2                                                                               |
| hsa-miR-200b-3p | <a href="#">COL9A2</a>    | collagen type IX alpha 2 chain                                                                                  |
| hsa-miR-200b-3p | <a href="#">CREG1</a>     | cellular repressor of E1A stimulated genes 1                                                                    |
| hsa-miR-200b-3p | <a href="#">TENT5D</a>    | terminal nucleotidyltransferase 5D                                                                              |
| hsa-miR-200b-3p | <a href="#">AMACR</a>     | alpha-methylacyl-CoA racemase                                                                                   |
| hsa-miR-200b-3p | <a href="#">MMS22L</a>    | MMS22 like, DNA repair protein                                                                                  |
| hsa-miR-200b-3p | <a href="#">RWDD2A</a>    | RWD domain containing 2A                                                                                        |
| hsa-miR-200b-3p | <a href="#">REFX7</a>     | regulatory factor X7                                                                                            |
| hsa-miR-200b-3p | <a href="#">AMOTL2</a>    | angiominin like 2                                                                                               |
| hsa-miR-200b-3p | <a href="#">DDX3Y</a>     | DEAD-box helicase 3 Y-linked                                                                                    |
| hsa-miR-200b-3p | <a href="#">KBTBD6</a>    | kelch repeat and BTB domain containing 6                                                                        |
| hsa-miR-200b-3p | <a href="#">ZNF692</a>    | zinc finger protein 692                                                                                         |
| hsa-miR-200b-3p | <a href="#">ZNF831</a>    | zinc finger protein 831                                                                                         |
| hsa-miR-200b-3p | <a href="#">PIA2</a>      | praja ring finger ubiquitin ligase 2                                                                            |
| hsa-miR-200b-3p | <a href="#">GPR63</a>     | G protein-coupled receptor 63                                                                                   |
| hsa-miR-200b-3p | <a href="#">PLEKHA8</a>   | pleckstrin homology domain containing A8                                                                        |
| hsa-miR-200b-3p | <a href="#">TRAT1</a>     | T cell receptor associated transmembrane adaptor 1                                                              |
| hsa-miR-200b-3p | <a href="#">ARL6IP6</a>   | ADP ribosylation factor like GTPase 6 interacting protein 6                                                     |

|                 |                          |                                                                       |
|-----------------|--------------------------|-----------------------------------------------------------------------|
| hsa-miR-200b-3p | <a href="#">STX16</a>    | syntaxin 16                                                           |
| hsa-miR-200b-3p | <a href="#">RELCH</a>    | RAB11 binding and LisH domain, coiled-coil and HEAT repeat containing |
| hsa-miR-200b-3p | <a href="#">DDX1</a>     | DEAD-box helicase 1                                                   |
| hsa-miR-200b-3p | <a href="#">SELENOK</a>  | selenoprotein K                                                       |
| hsa-miR-200b-3p | <a href="#">SNX30</a>    | sorting nexin family member 30                                        |
| hsa-miR-200b-3p | <a href="#">DNAJC18</a>  | DnaJ heat shock protein family (Hsp40) member C18                     |
| hsa-miR-200b-3p | <a href="#">SHROOM4</a>  | shroom family member 4                                                |
| hsa-miR-200b-3p | <a href="#">CDH6</a>     | cadherin 6                                                            |
| hsa-miR-200b-3p | <a href="#">ZNF568</a>   | zinc finger protein 568                                               |
| hsa-miR-200b-3p | <a href="#">ARHGEF3</a>  | Rho guanine nucleotide exchange factor 3                              |
| hsa-miR-200b-3p | <a href="#">NAPB</a>     | NSF attachment protein beta                                           |
| hsa-miR-200b-3p | <a href="#">RET</a>      | ret proto-oncogene                                                    |
| hsa-miR-200b-3p | <a href="#">RAD18</a>    | RAD18, E3 ubiquitin protein ligase                                    |
| hsa-miR-200b-3p | <a href="#">HLA-DPA1</a> | major histocompatibility complex, class II, DP alpha 1                |
| hsa-miR-200b-3p | <a href="#">ADGRL2</a>   | adhesion G protein-coupled receptor L2                                |
| hsa-miR-200b-3p | <a href="#">SLC17A4</a>  | solute carrier family 17 member 4                                     |
| hsa-miR-200b-3p | <a href="#">ELAVL4</a>   | ELAV like RNA binding protein 4                                       |
| hsa-miR-200b-3p | <a href="#">ZBTB5</a>    | zinc finger and BTB domain containing 5                               |
| hsa-miR-200b-3p | <a href="#">ENAH</a>     | ENAH, actin regulator                                                 |
| hsa-miR-200b-3p | <a href="#">SLC25A24</a> | solute carrier family 25 member 24                                    |
| hsa-miR-200b-3p | <a href="#">ZMYM4</a>    | zinc finger MYM-type containing 4                                     |
| hsa-miR-200b-3p | <a href="#">HNRNPU</a>   | heterogeneous nuclear ribonucleoprotein U                             |
| hsa-miR-200b-3p | <a href="#">CALHM5</a>   | calcium homeostasis modulator family member 5                         |
| hsa-miR-200b-3p | <a href="#">GDPD1</a>    | glycerophosphodiester phosphodiesterase domain containing 1           |
| hsa-miR-200b-3p | <a href="#">CRHBP</a>    | corticotropin releasing hormone binding protein                       |
| hsa-miR-200b-3p | <a href="#">RBFA</a>     | ribosome binding factor A                                             |
| hsa-miR-200b-3p | <a href="#">EPM2AIP1</a> | EPM2A interacting protein 1                                           |
| hsa-miR-200b-3p | <a href="#">MPPED1</a>   | metallophosphoesterase domain containing 1                            |
| hsa-miR-200b-3p | <a href="#">RCN1</a>     | reticulocalbin 1                                                      |
| hsa-miR-200b-3p | <a href="#">AK9</a>      | adenylate kinase 9                                                    |
| hsa-miR-200b-3p | <a href="#">UXS1</a>     | UDP-glucuronate decarboxylase 1                                       |
| hsa-miR-200b-3p | <a href="#">LMAN1</a>    | lectin, mannose binding 1                                             |
| hsa-miR-200b-3p | <a href="#">CCSAP</a>    | centriole, cilia and spindle associated protein                       |
| hsa-miR-200b-3p | <a href="#">KLF10</a>    | Kruppel like factor 10                                                |
| hsa-miR-200b-3p | <a href="#">COPS2</a>    | COP9 signalosome subunit 2                                            |
| hsa-miR-200b-3p | <a href="#">SLAIN1</a>   | SLAIN motif family member 1                                           |
| hsa-miR-200b-3p | <a href="#">ZDHHC15</a>  | zinc finger DHHC-type containing 15                                   |
| hsa-miR-200b-3p | <a href="#">SCHIP1</a>   | schwannomin interacting protein 1                                     |
| hsa-miR-200b-3p | <a href="#">MRPS35</a>   | mitochondrial ribosomal protein S35                                   |
| hsa-miR-200b-3p | <a href="#">CDC27</a>    | cell division cycle 27                                                |
| hsa-miR-200b-3p | <a href="#">GOSR2</a>    | golgi SNAP receptor complex member 2                                  |
| hsa-miR-200b-3p | <a href="#">IPMK</a>     | inositol polyphosphate multikinase                                    |
| hsa-miR-200b-3p | <a href="#">STAC</a>     | SH3 and cysteine rich domain                                          |

|                 |                          |                                                             |
|-----------------|--------------------------|-------------------------------------------------------------|
| hsa-miR-200b-3p | <a href="#">KLHL3</a>    | kelch like family member 3                                  |
| hsa-miR-200b-3p | <a href="#">USP47</a>    | ubiquitin specific peptidase 47                             |
| hsa-miR-200b-3p | <a href="#">TP53TG3C</a> | TP53 target 3C                                              |
| hsa-miR-200b-3p | <a href="#">TTC5</a>     | tetratricopeptide repeat domain 5                           |
| hsa-miR-200b-3p | <a href="#">EIF2S1</a>   | eukaryotic translation initiation factor 2 subunit alpha    |
| hsa-miR-200b-3p | <a href="#">NOL12</a>    | nucleolar protein 12                                        |
| hsa-miR-200b-3p | <a href="#">GPC6</a>     | glypican 6                                                  |
| hsa-miR-200b-3p | <a href="#">GPX8</a>     | glutathione peroxidase 8 (putative)                         |
| hsa-miR-200b-3p | <a href="#">EXOSC3</a>   | exosome component 3                                         |
| hsa-miR-200b-3p | <a href="#">GREM2</a>    | gremlin 2, DAN family BMP antagonist                        |
| hsa-miR-200b-3p | <a href="#">NSMCE3</a>   | NSE3 homolog, SMC5-SMC6 complex component                   |
| hsa-miR-200b-3p | <a href="#">HMOX1</a>    | heme oxygenase 1                                            |
| hsa-miR-200b-3p | <a href="#">APLP2</a>    | amyloid beta precursor like protein 2                       |
| hsa-miR-200b-3p | <a href="#">ATF7IP</a>   | activating transcription factor 7 interacting protein       |
| hsa-miR-200b-3p | <a href="#">CALHM1</a>   | calcium homeostasis modulator 1                             |
| hsa-miR-200b-3p | <a href="#">CLDND1</a>   | claudin domain containing 1                                 |
| hsa-miR-200b-3p | <a href="#">TTC33</a>    | tetratricopeptide repeat domain 33                          |
| hsa-miR-200b-3p | <a href="#">AVPR1A</a>   | arginine vasopressin receptor 1A                            |
| hsa-miR-200b-3p | <a href="#">ASB13</a>    | ankyrin repeat and SOCS box containing 13                   |
| hsa-miR-200b-3p | <a href="#">SAMD12</a>   | sterile alpha motif domain containing 12                    |
| hsa-miR-200b-3p | <a href="#">ADD3</a>     | adducin 3                                                   |
| hsa-miR-200b-3p | <a href="#">IFIT5</a>    | interferon induced protein with tetratricopeptide repeats 5 |
| hsa-miR-200b-3p | <a href="#">ENTPD5</a>   | ectonucleoside triphosphate diphosphohydrolase 5            |
| hsa-miR-200b-3p | <a href="#">CCDC144A</a> | coiled-coil domain containing 144A                          |
| hsa-miR-200b-3p | <a href="#">TTC21B</a>   | tetratricopeptide repeat domain 21B                         |
| hsa-miR-200b-3p | <a href="#">DGKE</a>     | diacylglycerol kinase epsilon                               |
| hsa-miR-200b-3p | <a href="#">JADE3</a>    | jade family PHD finger 3                                    |
| hsa-miR-200b-3p | <a href="#">PTPN13</a>   | protein tyrosine phosphatase, non-receptor type 13          |
| hsa-miR-200b-3p | <a href="#">NCBP3</a>    | nuclear cap binding subunit 3                               |
| hsa-miR-200b-3p | <a href="#">MYEOV</a>    | myeloma overexpressed                                       |
| hsa-miR-200b-3p | <a href="#">RBM48</a>    | RNA binding motif protein 48                                |
| hsa-miR-200b-3p | <a href="#">UCHL5</a>    | ubiquitin C-terminal hydrolase L5                           |
| hsa-miR-200b-3p | <a href="#">ABI2</a>     | abl interactor 2                                            |
| hsa-miR-200b-3p | <a href="#">DR1</a>      | down-regulator of transcription 1                           |
| hsa-miR-200b-3p | <a href="#">TAF5L</a>    | TATA-box binding protein associated factor 5 like           |
| hsa-miR-200b-3p | <a href="#">NECTIN1</a>  | nectin cell adhesion molecule 1                             |
| hsa-miR-200b-3p | <a href="#">MAP2K5</a>   | mitogen-activated protein kinase kinase 5                   |
| hsa-miR-200b-3p | <a href="#">FGF9</a>     | fibroblast growth factor 9                                  |
| hsa-miR-200b-3p | <a href="#">DNMT3A</a>   | DNA methyltransferase 3 alpha                               |
| hsa-miR-200b-3p | <a href="#">ZDBF2</a>    | zinc finger DBF-type containing 2                           |
| hsa-miR-200b-3p | <a href="#">CNDP2</a>    | carnosine dipeptidase 2                                     |
| hsa-miR-200b-3p | <a href="#">RALB</a>     | RAS like proto-oncogene B                                   |
| hsa-miR-200b-3p | <a href="#">RUFY2</a>    | RUN and FYVE domain containing 2                            |
| hsa-miR-200b-3p | <a href="#">REL</a>      | REL proto-oncogene, NF-kB subunit                           |

|                 |                           |                                                                              |
|-----------------|---------------------------|------------------------------------------------------------------------------|
| hsa-miR-200b-3p | <a href="#">RHOA</a>      | ras homolog family member A                                                  |
| hsa-miR-200b-3p | <a href="#">SH3TC2</a>    | SH3 domain and tetratricopeptide repeats 2                                   |
| hsa-miR-200b-3p | <a href="#">MPP5</a>      | membrane palmitoylated protein 5                                             |
| hsa-miR-200b-3p | <a href="#">CCDC62</a>    | coiled-coil domain containing 62                                             |
| hsa-miR-200b-3p | <a href="#">SLC5A3</a>    | solute carrier family 5 member 3                                             |
| hsa-miR-200b-3p | <a href="#">PRKAA2</a>    | protein kinase AMP-activated catalytic subunit alpha 2                       |
| hsa-miR-200b-3p | <a href="#">HPF1</a>      | histone PARylation factor 1                                                  |
| hsa-miR-200b-3p | <a href="#">TC2N</a>      | tandem C2 domains, nuclear                                                   |
| hsa-miR-200b-3p | <a href="#">SMPX</a>      | small muscle protein X-linked                                                |
| hsa-miR-200b-3p | <a href="#">NRK</a>       | Nik related kinase                                                           |
| hsa-miR-200b-3p | <a href="#">SLC16A1</a>   | solute carrier family 16 member 1                                            |
| hsa-miR-200b-3p | <a href="#">MGA</a>       | MGA, MAX dimerization protein                                                |
| hsa-miR-200c-3p | <a href="#">VASH2</a>     | vasohibin 2                                                                  |
| hsa-miR-200c-3p | <a href="#">HIPK3</a>     | homeodomain interacting protein kinase 3                                     |
| hsa-miR-200c-3p | <a href="#">MAP2</a>      | microtubule associated protein 2                                             |
| hsa-miR-200c-3p | <a href="#">ERRFI1</a>    | ERBB receptor feedback inhibitor 1                                           |
| hsa-miR-200c-3p | <a href="#">ZEB1</a>      | zinc finger E-box binding homeobox 1                                         |
| hsa-miR-200c-3p | <a href="#">NR5A2</a>     | nuclear receptor subfamily 5 group A member 2                                |
| hsa-miR-200c-3p | <a href="#">ZEB2</a>      | zinc finger E-box binding homeobox 2                                         |
| hsa-miR-200c-3p | <a href="#">RECK</a>      | reversion inducing cysteine rich protein with kazal motifs                   |
| hsa-miR-200c-3p | <a href="#">SLIT2</a>     | slit guidance ligand 2                                                       |
| hsa-miR-200c-3p | <a href="#">WIPF1</a>     | WAS/WASL interacting protein family member 1                                 |
| hsa-miR-200c-3p | <a href="#">C11orf95</a>  | chromosome 11 open reading frame 95                                          |
| hsa-miR-200c-3p | <a href="#">FAM8A1</a>    | family with sequence similarity 8 member A1                                  |
| hsa-miR-200c-3p | <a href="#">LHFPL6</a>    | LHFPL tetraspan subfamily member 6                                           |
| hsa-miR-200c-3p | <a href="#">AP1S2</a>     | adaptor related protein complex 1 subunit sigma 2                            |
| hsa-miR-200c-3p | <a href="#">SEC23A</a>    | Sec23 homolog A, coat complex II component                                   |
| hsa-miR-200c-3p | <a href="#">TBX18</a>     | T-box 18                                                                     |
| hsa-miR-200c-3p | <a href="#">PTPN21</a>    | protein tyrosine phosphatase, non-receptor type 21                           |
| hsa-miR-200c-3p | <a href="#">DNAJC3</a>    | DnaJ heat shock protein family (Hsp40) member C3                             |
| hsa-miR-200c-3p | <a href="#">QKI</a>       | QKI, KH domain containing RNA binding                                        |
| hsa-miR-200c-3p | <a href="#">RIC1</a>      | RIC1 homolog, RAB6A GEF complex partner 1                                    |
| hsa-miR-200c-3p | <a href="#">CCNI</a>      | cyclin J                                                                     |
| hsa-miR-200c-3p | <a href="#">PCMTD1</a>    | protein-L-isoaspartate (D-aspartate) O-methyltransferase domain containing 1 |
| hsa-miR-200c-3p | <a href="#">CFL2</a>      | cofilin 2                                                                    |
| hsa-miR-200c-3p | <a href="#">GPM6A</a>     | glycoprotein M6A                                                             |
| hsa-miR-200c-3p | <a href="#">ARHGAP6</a>   | Rho GTPase activating protein 6                                              |
| hsa-miR-200c-3p | <a href="#">TFAP2A</a>    | transcription factor AP-2 alpha                                              |
| hsa-miR-200c-3p | <a href="#">SLC35B4</a>   | solute carrier family 35 member B4                                           |
| hsa-miR-200c-3p | <a href="#">BAP1</a>      | BRCA1 associated protein 1                                                   |
| hsa-miR-200c-3p | <a href="#">RAB11FIP2</a> | RAB11 family interacting protein 2                                           |
| hsa-miR-200c-3p | <a href="#">MSN</a>       | moesin                                                                       |
| hsa-miR-200c-3p | <a href="#">FBXW7</a>     | F-box and WD repeat domain containing 7                                      |
| hsa-miR-200c-3p | <a href="#">TRIM33</a>    | tripartite motif containing 33                                               |

|                 |                         |                                                                             |
|-----------------|-------------------------|-----------------------------------------------------------------------------|
| hsa-miR-200c-3p | <a href="#">CNOT6</a>   | CCR4-NOT transcription complex subunit 6                                    |
| hsa-miR-200c-3p | <a href="#">PRTG</a>    | protogenin                                                                  |
| hsa-miR-200c-3p | <a href="#">RPS6KB1</a> | ribosomal protein S6 kinase B1                                              |
| hsa-miR-200c-3p | <a href="#">NOVA2</a>   | NOVA alternative splicing regulator 2                                       |
| hsa-miR-200c-3p | <a href="#">WASF3</a>   | WAS protein family member 3                                                 |
| hsa-miR-200c-3p | <a href="#">KDM7A</a>   | lysine demethylase 7A                                                       |
| hsa-miR-200c-3p | <a href="#">ELL2</a>    | elongation factor for RNA polymerase II 2                                   |
| hsa-miR-200c-3p | <a href="#">ATXN1</a>   | ataxin 1                                                                    |
| hsa-miR-200c-3p | <a href="#">SYNJ1</a>   | synaptojanin 1                                                              |
| hsa-miR-200c-3p | <a href="#">MIEF1</a>   | mitochondrial elongation factor 1                                           |
| hsa-miR-200c-3p | <a href="#">MBNL3</a>   | muscleblind like splicing regulator 3                                       |
| hsa-miR-200c-3p | <a href="#">CSNK1G3</a> | casein kinase 1 gamma 3                                                     |
| hsa-miR-200c-3p | <a href="#">KHDRBS1</a> | KH RNA binding domain containing, signal transduction associated 1          |
| hsa-miR-200c-3p | <a href="#">ELMOD2</a>  | ELMO domain containing 2                                                    |
| hsa-miR-200c-3p | <a href="#">MCFD2</a>   | multiple coagulation factor deficiency 2                                    |
| hsa-miR-200c-3p | <a href="#">CRKL</a>    | CRK like proto-oncogene, adaptor protein                                    |
| hsa-miR-200c-3p | <a href="#">TENT4B</a>  | terminal nucleotidyltransferase 4B                                          |
| hsa-miR-200c-3p | <a href="#">MPRIIP</a>  | myosin phosphatase Rho interacting protein                                  |
| hsa-miR-200c-3p | <a href="#">PPP4R2</a>  | protein phosphatase 4 regulatory subunit 2                                  |
| hsa-miR-200c-3p | <a href="#">MGAT2</a>   | mannosyl (alpha-1,6-)-glycoprotein beta-1,2-N-acetylglucosaminyltransferase |
| hsa-miR-200c-3p | <a href="#">FAM122C</a> | family with sequence similarity 122C                                        |
| hsa-miR-200c-3p | <a href="#">NFIA</a>    | nuclear factor I A                                                          |
| hsa-miR-200c-3p | <a href="#">SUSD5</a>   | sushi domain containing 5                                                   |
| hsa-miR-200c-3p | <a href="#">FEZ2</a>    | fasciculation and elongation protein zeta 2                                 |
| hsa-miR-200c-3p | <a href="#">PRDM16</a>  | PR/SET domain 16                                                            |
| hsa-miR-200c-3p | <a href="#">LRP1B</a>   | LDL receptor related protein 1B                                             |
| hsa-miR-200c-3p | <a href="#">PPP2R5E</a> | protein phosphatase 2 regulatory subunit B'epsilon                          |
| hsa-miR-200c-3p | <a href="#">PTPN14</a>  | protein tyrosine phosphatase, non-receptor type 14                          |
| hsa-miR-200c-3p | <a href="#">OSTM1</a>   | osteoclastogenesis associated transmembrane protein 1                       |
| hsa-miR-200c-3p | <a href="#">FAM126B</a> | family with sequence similarity 126 member B                                |
| hsa-miR-200c-3p | <a href="#">CDK17</a>   | cyclin dependent kinase 17                                                  |
| hsa-miR-200c-3p | <a href="#">FRMD6</a>   | FERM domain containing 6                                                    |
| hsa-miR-200c-3p | <a href="#">RBSN</a>    | rabenosyn, RAB effector                                                     |
| hsa-miR-200c-3p | <a href="#">JAKMIP2</a> | janus kinase and microtubule interacting protein 2                          |
| hsa-miR-200c-3p | <a href="#">PIK3CA</a>  | phosphatidylinositol-4,5-bisphosphate 3-kinase catalytic subunit alpha      |
| hsa-miR-200c-3p | <a href="#">CCDC177</a> | coiled-coil domain containing 177                                           |
| hsa-miR-200c-3p | <a href="#">ARIH1</a>   | ariadne RBR E3 ubiquitin protein ligase 1                                   |
| hsa-miR-200c-3p | <a href="#">ATP11C</a>  | ATPase phospholipid transporting 11C                                        |
| hsa-miR-200c-3p | <a href="#">RTF1</a>    | RTF1 homolog, Paf1/RNA polymerase II complex component                      |
| hsa-miR-200c-3p | <a href="#">PPM1F</a>   | protein phosphatase, Mg2+/Mn2+ dependent 1F                                 |
| hsa-miR-200c-3p | <a href="#">RAP2C</a>   | RAP2C, member of RAS oncogene family                                        |
| hsa-miR-200c-3p | <a href="#">MMD</a>     | monocyte to macrophage differentiation associated                           |



|                 |                          |                                                       |
|-----------------|--------------------------|-------------------------------------------------------|
| hsa-miR-200c-3p | <a href="#">CHN2</a>     | chimerin 2                                            |
| hsa-miR-200c-3p | <a href="#">PHF21B</a>   | PHD finger protein 21B                                |
| hsa-miR-200c-3p | <a href="#">SULF1</a>    | sulfatase 1                                           |
| hsa-miR-200c-3p | <a href="#">ARL2BP</a>   | ADP ribosylation factor like GTPase 2 binding protein |
| hsa-miR-200c-3p | <a href="#">ADIPOR2</a>  | adiponectin receptor 2                                |
| hsa-miR-200c-3p | <a href="#">ZNF532</a>   | zinc finger protein 532                               |
| hsa-miR-200c-3p | <a href="#">PHACTR3</a>  | phosphatase and actin regulator 3                     |
| hsa-miR-200c-3p | <a href="#">RASAA2</a>   | RAS p21 protein activator 2                           |
| hsa-miR-200c-3p | <a href="#">ZNF711</a>   | zinc finger protein 711                               |
| hsa-miR-200c-3p | <a href="#">SEMA6D</a>   | semaphorin 6D                                         |
| hsa-miR-200c-3p | <a href="#">VLDLR</a>    | very low density lipoprotein receptor                 |
| hsa-miR-200c-3p | <a href="#">IGSF10</a>   | immunoglobulin superfamily member 10                  |
| hsa-miR-200c-3p | <a href="#">WNT16</a>    | Wnt family member 16                                  |
| hsa-miR-200c-3p | <a href="#">CBL</a>      | Cbl proto-oncogene                                    |
| hsa-miR-200c-3p | <a href="#">EPS8</a>     | epidermal growth factor receptor pathway substrate 8  |
| hsa-miR-200c-3p | <a href="#">NANOS1</a>   | nanos C2HC-type zinc finger 1                         |
| hsa-miR-200c-3p | <a href="#">TMOD3</a>    | tropomodulin 3                                        |
| hsa-miR-200c-3p | <a href="#">COL4A3BP</a> | collagen type IV alpha 3 binding protein              |
| hsa-miR-200c-3p | <a href="#">KDELIC1</a>  | KDEL motif containing 1                               |
| hsa-miR-200c-3p | <a href="#">MINDY2</a>   | MINDY lysine 48 deubiquitinase 2                      |
| hsa-miR-200c-3p | <a href="#">RND3</a>     | Rho family GTPase 3                                   |
| hsa-miR-200c-3p | <a href="#">KDR</a>      | kinase insert domain receptor                         |
| hsa-miR-200c-3p | <a href="#">OTUD4</a>    | OTU deubiquitinase 4                                  |
| hsa-miR-200c-3p | <a href="#">NCOA2</a>    | nuclear receptor coactivator 2                        |
| hsa-miR-200c-3p | <a href="#">HMBOX1</a>   | homeobox containing 1                                 |
| hsa-miR-200c-3p | <a href="#">DUSP1</a>    | dual specificity phosphatase 1                        |
| hsa-miR-200c-3p | <a href="#">ELOC</a>     | elongin C                                             |
| hsa-miR-200c-3p | <a href="#">C16orf72</a> | chromosome 16 open reading frame 72                   |
| hsa-miR-200c-3p | <a href="#">EGLN1</a>    | egl-9 family hypoxia inducible factor 1               |
| hsa-miR-200c-3p | <a href="#">CLASP1</a>   | cytoplasmic linker associated protein 1               |
| hsa-miR-200c-3p | <a href="#">ZFAND6</a>   | zinc finger AN1-type containing 6                     |
| hsa-miR-200c-3p | <a href="#">FOXG1</a>    | forkhead box G1                                       |
| hsa-miR-200c-3p | <a href="#">KCNQ3</a>    | potassium voltage-gated channel subfamily Q member 3  |
| hsa-miR-200c-3p | <a href="#">MBOAT2</a>   | membrane bound O-acyltransferase domain containing 2  |
| hsa-miR-200c-3p | <a href="#">PHTF2</a>    | putative homeodomain transcription factor 2           |
| hsa-miR-200c-3p | <a href="#">BRWD3</a>    | bromodomain and WD repeat domain containing 3         |
| hsa-miR-200c-3p | <a href="#">NBR1</a>     | NBR1, autophagy cargo receptor                        |
| hsa-miR-200c-3p | <a href="#">ZNF131</a>   | zinc finger protein 131                               |
| hsa-miR-200c-3p | <a href="#">AFF3</a>     | AF4/FMR2 family member 3                              |
| hsa-miR-200c-3p | <a href="#">ARL5A</a>    | ADP ribosylation factor like GTPase 5A                |
| hsa-miR-200c-3p | <a href="#">TMX4</a>     | thioredoxin related transmembrane protein 4           |
| hsa-miR-200c-3p | <a href="#">IMMP2L</a>   | inner mitochondrial membrane peptidase subunit 2      |
| hsa-miR-200c-3p | <a href="#">MAP3K1</a>   | mitogen-activated protein kinase kinase kinase 1      |
| hsa-miR-200c-3p | <a href="#">SGIP1</a>    | SH3 domain GRB2 like endophilin interacting protein 1 |
| hsa-miR-200c-3p | <a href="#">IPO7</a>     | importin 7                                            |

|                 |                                |                                                               |
|-----------------|--------------------------------|---------------------------------------------------------------|
| hsa-miR-200c-3p | <a href="#">GOLGA7</a>         | golgin A7                                                     |
| hsa-miR-200c-3p | <a href="#">DLC1</a>           | DLC1 Rho GTPase activating protein                            |
| hsa-miR-200c-3p | <a href="#">XKR8</a>           | XK related 8                                                  |
| hsa-miR-200c-3p | <a href="#">ELK4</a>           | ELK4, ETS transcription factor                                |
| hsa-miR-200c-3p | <a href="#">FN1</a>            | fibronectin 1                                                 |
| hsa-miR-200c-3p | <a href="#">SESN1</a>          | sestrin 1                                                     |
| hsa-miR-200c-3p | <a href="#">JUN</a>            | Jun proto-oncogene, AP-1 transcription factor subunit         |
| hsa-miR-200c-3p | <a href="#">GPR158</a>         | G protein-coupled receptor 158                                |
| hsa-miR-200c-3p | <a href="#">DGKH</a>           | diacylglycerol kinase eta                                     |
| hsa-miR-200c-3p | <a href="#">SYDE1</a>          | synapse defective Rho GTPase homolog 1                        |
| hsa-miR-200c-3p | <a href="#">PPHLN1</a>         | periphilin 1                                                  |
| hsa-miR-200c-3p | <a href="#">ZC3H6</a>          | zinc finger CCCH-type containing 6                            |
| hsa-miR-200c-3p | <a href="#">PRKG1</a>          | protein kinase cGMP-dependent 1                               |
| hsa-miR-200c-3p | <a href="#">SLC1A2</a>         | solute carrier family 1 member 2                              |
| hsa-miR-200c-3p | <a href="#">RANBP9</a>         | RAN binding protein 9                                         |
| hsa-miR-200c-3p | <a href="#">GOLGA1</a>         | golgin A1                                                     |
| hsa-miR-200c-3p | <a href="#">LOX</a>            | lysyl oxidase                                                 |
| hsa-miR-200c-3p | <a href="#">GIT2</a>           | GIT ArfGAP 2                                                  |
| hsa-miR-200c-3p | <a href="#">ARMCX5-GPRASP2</a> | ARMCX5-GPRASP2 readthrough                                    |
| hsa-miR-200c-3p | <a href="#">MPDZ</a>           | multiple PDZ domain crumbs cell polarity complex component    |
| hsa-miR-200c-3p | <a href="#">PGM2L1</a>         | phosphoglucomutase 2 like 1                                   |
| hsa-miR-200c-3p | <a href="#">PRKACB</a>         | protein kinase cAMP-activated catalytic subunit beta          |
| hsa-miR-200c-3p | <a href="#">CDH20</a>          | cadherin 20                                                   |
| hsa-miR-200c-3p | <a href="#">NTF3</a>           | neurotrophin 3                                                |
| hsa-miR-200c-3p | <a href="#">B3GNT2</a>         | UDP-GlcNAc:betaGal beta-1,3-N-acetylglucosaminyltransferase 2 |
| hsa-miR-200c-3p | <a href="#">PSAT1</a>          | phosphoserine aminotransferase 1                              |
| hsa-miR-200c-3p | <a href="#">REEP1</a>          | receptor accessory protein 1                                  |
| hsa-miR-200c-3p | <a href="#">MED13</a>          | mediator complex subunit 13                                   |
| hsa-miR-200c-3p | <a href="#">TBK1</a>           | TANK binding kinase 1                                         |
| hsa-miR-200c-3p | <a href="#">TBC1D12</a>        | TBC1 domain family member 12                                  |
| hsa-miR-200c-3p | <a href="#">MAPK7</a>          | mitogen-activated protein kinase 7                            |
| hsa-miR-200c-3p | <a href="#">WAPL</a>           | WAPL cohesin release factor                                   |
| hsa-miR-200c-3p | <a href="#">VEGFA</a>          | vascular endothelial growth factor A                          |
| hsa-miR-200c-3p | <a href="#">RUSC2</a>          | RUN and SH3 domain containing 2                               |
| hsa-miR-200c-3p | <a href="#">SFXN1</a>          | sideroflexin 1                                                |
| hsa-miR-200c-3p | <a href="#">ZFX</a>            | zinc finger protein X-linked                                  |
| hsa-miR-200c-3p | <a href="#">HS2ST1</a>         | heparan sulfate 2-O-sulfotransferase 1                        |
| hsa-miR-200c-3p | <a href="#">BLCAP</a>          | BLCAP, apoptosis inducing factor                              |
| hsa-miR-200c-3p | <a href="#">RAB21</a>          | RAB21, member RAS oncogene family                             |
| hsa-miR-200c-3p | <a href="#">GPRASP2</a>        | G protein-coupled receptor associated sorting protein 2       |
| hsa-miR-200c-3p | <a href="#">DESI1</a>          | desumoylating isopeptidase 1                                  |
| hsa-miR-200c-3p | <a href="#">FOXF1</a>          | forkhead box F1                                               |

|                 |                          |                                                                      |
|-----------------|--------------------------|----------------------------------------------------------------------|
| hsa-miR-200c-3p | <a href="#">PTPRZ1</a>   | protein tyrosine phosphatase, receptor type Z1                       |
| hsa-miR-200c-3p | <a href="#">TMEM17</a>   | transmembrane protein 17                                             |
| hsa-miR-200c-3p | <a href="#">FSCN1</a>    | fascin actin-bundling protein 1                                      |
| hsa-miR-200c-3p | <a href="#">PPP1R18</a>  | protein phosphatase 1 regulatory subunit 18                          |
| hsa-miR-200c-3p | <a href="#">RNF2</a>     | ring finger protein 2                                                |
| hsa-miR-200c-3p | <a href="#">THAP1</a>    | THAP domain containing 1                                             |
| hsa-miR-200c-3p | <a href="#">CLIC4</a>    | chloride intracellular channel 4                                     |
| hsa-miR-200c-3p | <a href="#">CECR2</a>    | CECR2, histone acetyl-lysine reader                                  |
| hsa-miR-200c-3p | <a href="#">HOOK1</a>    | hook microtubule tethering protein 1                                 |
| hsa-miR-200c-3p | <a href="#">PPM1E</a>    | protein phosphatase, Mg <sup>2+</sup> /Mn <sup>2+</sup> dependent 1E |
| hsa-miR-200c-3p | <a href="#">CHRD1</a>    | chordin like 1                                                       |
| hsa-miR-200c-3p | <a href="#">DTNA</a>     | dystrobrevin alpha                                                   |
| hsa-miR-200c-3p | <a href="#">ZBTB10</a>   | zinc finger and BTB domain containing 10                             |
| hsa-miR-200c-3p | <a href="#">B3GLCT</a>   | beta 3-glucosyltransferase                                           |
| hsa-miR-200c-3p | <a href="#">DNAJB9</a>   | DnaJ heat shock protein family (Hsp40) member B9                     |
| hsa-miR-200c-3p | <a href="#">FAT3</a>     | FAT atypical cadherin 3                                              |
| hsa-miR-200c-3p | <a href="#">NR3C1</a>    | nuclear receptor subfamily 3 group C member 1                        |
| hsa-miR-200c-3p | <a href="#">FAM227B</a>  | family with sequence similarity 227 member B                         |
| hsa-miR-200c-3p | <a href="#">CSMD3</a>    | CUB and Sushi multiple domains 3                                     |
| hsa-miR-200c-3p | <a href="#">PPFIA1</a>   | PTPRF interacting protein alpha 1                                    |
| hsa-miR-200c-3p | <a href="#">KCTD8</a>    | potassium channel tetramerization domain containing 8                |
| hsa-miR-200c-3p | <a href="#">PI4K2B</a>   | phosphatidylinositol 4-kinase type 2 beta                            |
| hsa-miR-200c-3p | <a href="#">ANKRD40</a>  | ankyrin repeat domain 40                                             |
| hsa-miR-200c-3p | <a href="#">VASH1</a>    | vasohibin 1                                                          |
| hsa-miR-200c-3p | <a href="#">PDS5B</a>    | PDS5 cohesin associated factor B                                     |
| hsa-miR-200c-3p | <a href="#">SLK</a>      | STE20 like kinase                                                    |
| hsa-miR-200c-3p | <a href="#">RTKN2</a>    | rhotekin 2                                                           |
| hsa-miR-200c-3p | <a href="#">RNF19A</a>   | ring finger protein 19A, RBR E3 ubiquitin protein ligase             |
| hsa-miR-200c-3p | <a href="#">FHL1</a>     | four and a half LIM domains 1                                        |
| hsa-miR-200c-3p | <a href="#">SPAG9</a>    | sperm associated antigen 9                                           |
| hsa-miR-200c-3p | <a href="#">DPY19L1</a>  | dpy-19 like C-mannosyltransferase 1                                  |
| hsa-miR-200c-3p | <a href="#">AMFR</a>     | autocrine motility factor receptor                                   |
| hsa-miR-200c-3p | <a href="#">ELAVL2</a>   | ELAV like RNA binding protein 2                                      |
| hsa-miR-200c-3p | <a href="#">LBR</a>      | lamin B receptor                                                     |
| hsa-miR-200c-3p | <a href="#">ZYG11B</a>   | zyg-11 family member B, cell cycle regulator                         |
| hsa-miR-200c-3p | <a href="#">CLIP1</a>    | CAP-Gly domain containing linker protein 1                           |
| hsa-miR-200c-3p | <a href="#">MOSMO</a>    | modulator of smoothened                                              |
| hsa-miR-200c-3p | <a href="#">WDR82</a>    | WD repeat domain 82                                                  |
| hsa-miR-200c-3p | <a href="#">SERPINI1</a> | serpin family I member 1                                             |
| hsa-miR-200c-3p | <a href="#">RASSF8</a>   | Ras association domain family member 8                               |
| hsa-miR-200c-3p | <a href="#">JAZF1</a>    | JAZF zinc finger 1                                                   |
| hsa-miR-200c-3p | <a href="#">TOB1</a>     | transducer of ERBB2, 1                                               |
| hsa-miR-200c-3p | <a href="#">EVI5</a>     | ecotropic viral integration site 5                                   |
| hsa-miR-200c-3p | <a href="#">B4GAT1</a>   | beta-1,4-glucuronyltransferase 1                                     |
| hsa-miR-200c-3p | <a href="#">POLK</a>     | DNA polymerase kappa                                                 |

|                 |                         |                                                                              |
|-----------------|-------------------------|------------------------------------------------------------------------------|
| hsa-miR-200c-3p | <a href="#">CHRM2</a>   | cholinergic receptor muscarinic 2                                            |
| hsa-miR-200c-3p | <a href="#">TRAPPC8</a> | trafficking protein particle complex 8                                       |
| hsa-miR-200c-3p | <a href="#">PUM2</a>    | pumilio RNA binding family member 2                                          |
| hsa-miR-200c-3p | <a href="#">CDYL</a>    | chromodomain Y like                                                          |
| hsa-miR-200c-3p | <a href="#">YWHAG</a>   | tyrosine 3-monooxygenase/tryptophan 5-monooxygenase activation protein gamma |
| hsa-miR-200c-3p | <a href="#">SLC6A11</a> | solute carrier family 6 member 11                                            |
| hsa-miR-200c-3p | <a href="#">TCAIM</a>   | T cell activation inhibitor, mitochondrial                                   |
| hsa-miR-200c-3p | <a href="#">PKD1</a>    | polycystin 1, transient receptor potential channel interacting               |
| hsa-miR-200c-3p | <a href="#">FBXO30</a>  | F-box protein 30                                                             |
| hsa-miR-200c-3p | <a href="#">DNMT3B</a>  | DNA methyltransferase 3 beta                                                 |
| hsa-miR-200c-3p | <a href="#">FBXO33</a>  | F-box protein 33                                                             |
| hsa-miR-200c-3p | <a href="#">ITGA1</a>   | integrin subunit alpha 1                                                     |
| hsa-miR-200c-3p | <a href="#">OCLN</a>    | occludin                                                                     |
| hsa-miR-200c-3p | <a href="#">CEP85L</a>  | centrosomal protein 85 like                                                  |
| hsa-miR-200c-3p | <a href="#">VAT1L</a>   | vesicle amine transport 1 like                                               |
| hsa-miR-200c-3p | <a href="#">SCAMP1</a>  | secretory carrier membrane protein 1                                         |
| hsa-miR-200c-3p | <a href="#">GABBR2</a>  | gamma-aminobutyric acid type B receptor subunit 2                            |
| hsa-miR-200c-3p | <a href="#">CAB39</a>   | calcium binding protein 39                                                   |
| hsa-miR-200c-3p | <a href="#">ADAMTS3</a> | ADAM metalloproteinase with thrombospondin type 1 motif 3                    |
| hsa-miR-200c-3p | <a href="#">SCAI</a>    | suppressor of cancer cell invasion                                           |
| hsa-miR-200c-3p | <a href="#">NEDD1</a>   | neural precursor cell expressed, developmentally down-regulated 1            |
| hsa-miR-200c-3p | <a href="#">LRRC8A</a>  | leucine rich repeat containing 8 VRAC subunit A                              |
| hsa-miR-200c-3p | <a href="#">ANKRD44</a> | ankyrin repeat domain 44                                                     |
| hsa-miR-200c-3p | <a href="#">NRBP1</a>   | nuclear receptor binding protein 1                                           |
| hsa-miR-200c-3p | <a href="#">S100PBP</a> | S100P binding protein                                                        |
| hsa-miR-200c-3p | <a href="#">USP25</a>   | ubiquitin specific peptidase 25                                              |
| hsa-miR-200c-3p | <a href="#">MAP4K5</a>  | mitogen-activated protein kinase kinase kinase kinase 5                      |
| hsa-miR-200c-3p | <a href="#">CAMSAP2</a> | calmodulin regulated spectrin associated protein family member 2             |
| hsa-miR-200c-3p | <a href="#">HDAC9</a>   | histone deacetylase 9                                                        |
| hsa-miR-200c-3p | <a href="#">PPP1R9B</a> | protein phosphatase 1 regulatory subunit 9B                                  |
| hsa-miR-200c-3p | <a href="#">PMAIP1</a>  | phorbol-12-myristate-13-acetate-induced protein 1                            |
| hsa-miR-200c-3p | <a href="#">MAP4K4</a>  | mitogen-activated protein kinase kinase kinase kinase 4                      |
| hsa-miR-200c-3p | <a href="#">FSD1L</a>   | fibronectin type III and SPRY domain containing 1 like                       |
| hsa-miR-200c-3p | <a href="#">STK4</a>    | serine/threonine kinase 4                                                    |
| hsa-miR-200c-3p | <a href="#">TSC22D1</a> | TSC22 domain family member 1                                                 |
| hsa-miR-200c-3p | <a href="#">PSIP1</a>   | PC4 and SFRS1 interacting protein 1                                          |
| hsa-miR-200c-3p | <a href="#">MFAP5</a>   | microfibril associated protein 5                                             |
| hsa-miR-200c-3p | <a href="#">SLC4A7</a>  | solute carrier family 4 member 7                                             |
| hsa-miR-200c-3p | <a href="#">NOG</a>     | noggin                                                                       |
| hsa-miR-200c-3p | <a href="#">SLC6A1</a>  | solute carrier family 6 member 1                                             |
| hsa-miR-200c-3p | <a href="#">MIB1</a>    | mindbomb E3 ubiquitin protein ligase 1                                       |

|                 |                          |                                                                        |
|-----------------|--------------------------|------------------------------------------------------------------------|
| hsa-miR-200c-3p | <a href="#">DCBLD2</a>   | discoidin, CUB and LCCL domain containing 2                            |
| hsa-miR-200c-3p | <a href="#">DENND5B</a>  | DENN domain containing 5B                                              |
| hsa-miR-200c-3p | <a href="#">CCNYL1</a>   | cyclin Y like 1                                                        |
| hsa-miR-200c-3p | <a href="#">CKAP4</a>    | cytoskeleton associated protein 4                                      |
| hsa-miR-200c-3p | <a href="#">STRN</a>     | striatin                                                               |
| hsa-miR-200c-3p | <a href="#">MARCH6</a>   | membrane associated ring-CH-type finger 6                              |
| hsa-miR-200c-3p | <a href="#">TMEFF2</a>   | transmembrane protein with EGF like and two follistatin like domains 2 |
| hsa-miR-200c-3p | <a href="#">GAS2L3</a>   | growth arrest specific 2 like 3                                        |
| hsa-miR-200c-3p | <a href="#">TLN2</a>     | talin 2                                                                |
| hsa-miR-200c-3p | <a href="#">HSPA13</a>   | heat shock protein family A (Hsp70) member 13                          |
| hsa-miR-200c-3p | <a href="#">SLC14A1</a>  | solute carrier family 14 member 1 (Kidd blood group)                   |
| hsa-miR-200c-3p | <a href="#">PAG1</a>     | phosphoprotein membrane anchor with glycosphingolipid microdomains 1   |
| hsa-miR-200c-3p | <a href="#">NTRK2</a>    | neurotrophic receptor tyrosine kinase 2                                |
| hsa-miR-200c-3p | <a href="#">PIKFYVE</a>  | phosphoinositide kinase, FYVE-type zinc finger containing              |
| hsa-miR-200c-3p | <a href="#">COPS8</a>    | COP9 signalosome subunit 8                                             |
| hsa-miR-200c-3p | <a href="#">USP27X</a>   | ubiquitin specific peptidase 27 X-linked                               |
| hsa-miR-200c-3p | <a href="#">KYNU</a>     | kynureninase                                                           |
| hsa-miR-200c-3p | <a href="#">TSSK1B</a>   | testis specific serine kinase 1B                                       |
| hsa-miR-200c-3p | <a href="#">PTPN12</a>   | protein tyrosine phosphatase, non-receptor type 12                     |
| hsa-miR-200c-3p | <a href="#">MARCKS</a>   | myristoylated alanine rich protein kinase C substrate                  |
| hsa-miR-200c-3p | <a href="#">AGFG1</a>    | ArfGAP with FG repeats 1                                               |
| hsa-miR-200c-3p | <a href="#">CBX4</a>     | chromobox 4                                                            |
| hsa-miR-200c-3p | <a href="#">CNOT9</a>    | CCR4-NOT transcription complex subunit 9                               |
| hsa-miR-200c-3p | <a href="#">ATP5F1B</a>  | ATP synthase F1 subunit beta                                           |
| hsa-miR-200c-3p | <a href="#">ZKSCAN8</a>  | zinc finger with KRAB and SCAN domains 8                               |
| hsa-miR-200c-3p | <a href="#">THAP2</a>    | THAP domain containing 2                                               |
| hsa-miR-200c-3p | <a href="#">TRMT9B</a>   | tRNA methyltransferase 9B (putative)                                   |
| hsa-miR-200c-3p | <a href="#">DIXDC1</a>   | DIX domain containing 1                                                |
| hsa-miR-200c-3p | <a href="#">NOVA1</a>    | NOVA alternative splicing regulator 1                                  |
| hsa-miR-200c-3p | <a href="#">DGKA</a>     | diacylglycerol kinase alpha                                            |
| hsa-miR-200c-3p | <a href="#">ZNF217</a>   | zinc finger protein 217                                                |
| hsa-miR-200c-3p | <a href="#">PCDH19</a>   | protocadherin 19                                                       |
| hsa-miR-200c-3p | <a href="#">SCN5A</a>    | sodium voltage-gated channel alpha subunit 5                           |
| hsa-miR-200c-3p | <a href="#">HS3ST1</a>   | heparan sulfate-glucosamine 3-sulfotransferase 1                       |
| hsa-miR-200c-3p | <a href="#">PITPNM3</a>  | PITPNM family member 3                                                 |
| hsa-miR-200c-3p | <a href="#">GXylT1</a>   | glucoside xylosyltransferase 1                                         |
| hsa-miR-200c-3p | <a href="#">PIM2</a>     | Pim-2 proto-oncogene, serine/threonine kinase                          |
| hsa-miR-200c-3p | <a href="#">INTS8</a>    | integrator complex subunit 8                                           |
| hsa-miR-200c-3p | <a href="#">CRH</a>      | corticotropin releasing hormone                                        |
| hsa-miR-200c-3p | <a href="#">RIMS2</a>    | regulating synaptic membrane exocytosis 2                              |
| hsa-miR-200c-3p | <a href="#">GLI3</a>     | GLI family zinc finger 3                                               |
| hsa-miR-200c-3p | <a href="#">TOGARAM1</a> | TOG array regulator of axonemal microtubules 1                         |
| hsa-miR-200c-3p | <a href="#">YPEL2</a>    | yippee like 2                                                          |

|                 |                         |                                                          |
|-----------------|-------------------------|----------------------------------------------------------|
| hsa-miR-200c-3p | <a href="#">ICAD</a>    | junctional cadherin 5 associated                         |
| hsa-miR-200c-3p | <a href="#">HDHD2</a>   | haloacid dehalogenase like hydrolase domain containing 2 |
| hsa-miR-200c-3p | <a href="#">ENO4</a>    | enolase 4                                                |
| hsa-miR-200c-3p | <a href="#">DENND5A</a> | DENN domain containing 5A                                |
| hsa-miR-200c-3p | <a href="#">TIMP2</a>   | TIMP metalloproteinase inhibitor 2                       |
| hsa-miR-200c-3p | <a href="#">SESN3</a>   | sestrin 3                                                |
| hsa-miR-200c-3p | <a href="#">USP6NL</a>  | USP6 N-terminal like                                     |
| hsa-miR-200c-3p | <a href="#">ERG</a>     | ETS transcription factor ERG                             |
| hsa-miR-200c-3p | <a href="#">CEP350</a>  | centrosomal protein 350                                  |
| hsa-miR-200c-3p | <a href="#">ZNF326</a>  | zinc finger protein 326                                  |
| hsa-miR-200c-3p | <a href="#">OSBPL11</a> | oxysterol binding protein like 11                        |
| hsa-miR-200c-3p | <a href="#">NAP1L5</a>  | nucleosome assembly protein 1 like 5                     |
| hsa-miR-200c-3p | <a href="#">RBFox2</a>  | RNA binding fox-1 homolog 2                              |
| hsa-miR-200c-3p | <a href="#">CYTH3</a>   | cytohesin 3                                              |
| hsa-miR-200c-3p | <a href="#">DPH6</a>    | diphthamine biosynthesis 6                               |
| hsa-miR-200c-3p | <a href="#">MATR3</a>   | matrin 3                                                 |
| hsa-miR-200c-3p | <a href="#">DNA2</a>    | DNA replication helicase/nuclease 2                      |
| hsa-miR-200c-3p | <a href="#">ATL2</a>    | atlastin GTPase 2                                        |
| hsa-miR-200c-3p | <a href="#">MAPRE1</a>  | microtubule associated protein RP/EB family member 1     |
| hsa-miR-200c-3p | <a href="#">ROCK2</a>   | Rho associated coiled-coil containing protein kinase 2   |
| hsa-miR-200c-3p | <a href="#">PROK2</a>   | prokineticin 2                                           |
| hsa-miR-200c-3p | <a href="#">DNAJB5</a>  | DnaJ heat shock protein family (Hsp40) member B5         |
| hsa-miR-200c-3p | <a href="#">ESRRG</a>   | estrogen related receptor gamma                          |
| hsa-miR-200c-3p | <a href="#">GNAQ</a>    | G protein subunit alpha q                                |
| hsa-miR-200c-3p | <a href="#">MAP4K3</a>  | mitogen-activated protein kinase kinase kinase kinase 3  |
| hsa-miR-200c-3p | <a href="#">CNEP1R1</a> | CTD nuclear envelope phosphatase 1 regulatory subunit 1  |
| hsa-miR-200c-3p | <a href="#">RIPK2</a>   | receptor interacting serine/threonine kinase 2           |
| hsa-miR-200c-3p | <a href="#">ZBTB38</a>  | zinc finger and BTB domain containing 38                 |
| hsa-miR-200c-3p | <a href="#">FIGNL2</a>  | fidgetin like 2                                          |
| hsa-miR-200c-3p | <a href="#">ATAD2B</a>  | ATPase family, AAA domain containing 2B                  |
| hsa-miR-200c-3p | <a href="#">FOXN2</a>   | forkhead box N2                                          |
| hsa-miR-200c-3p | <a href="#">ETS1</a>    | ETS proto-oncogene 1, transcription factor               |
| hsa-miR-200c-3p | <a href="#">AKAP7</a>   | A-kinase anchoring protein 7                             |
| hsa-miR-200c-3p | <a href="#">PLPP3</a>   | phospholipid phosphatase 3                               |
| hsa-miR-200c-3p | <a href="#">SRGAP1</a>  | SLIT-ROBO Rho GTPase activating protein 1                |
| hsa-miR-200c-3p | <a href="#">HECTD2</a>  | HECT domain E3 ubiquitin protein ligase 2                |
| hsa-miR-200c-3p | <a href="#">ELK3</a>    | ELK3, ETS transcription factor                           |
| hsa-miR-200c-3p | <a href="#">CEP41</a>   | centrosomal protein 41                                   |
| hsa-miR-200c-3p | <a href="#">CNKSR3</a>  | CNKSR family member 3                                    |
| hsa-miR-200c-3p | <a href="#">ULK2</a>    | unc-51 like autophagy activating kinase 2                |
| hsa-miR-200c-3p | <a href="#">ZFPM2</a>   | zinc finger protein, FOG family member 2                 |
| hsa-miR-200c-3p | <a href="#">ZMAT3</a>   | zinc finger matrin-type 3                                |
| hsa-miR-200c-3p | <a href="#">RDH10</a>   | retinol dehydrogenase 10                                 |



|                 |                          |                                                                                                   |
|-----------------|--------------------------|---------------------------------------------------------------------------------------------------|
| hsa-miR-200c-3p | <a href="#">SLC25A36</a> | solute carrier family 25 member 36                                                                |
| hsa-miR-200c-3p | <a href="#">CCDC82</a>   | coiled-coil domain containing 82                                                                  |
| hsa-miR-200c-3p | <a href="#">SLC30A7</a>  | solute carrier family 30 member 7                                                                 |
| hsa-miR-200c-3p | <a href="#">SCD</a>      | stearoyl-CoA desaturase                                                                           |
| hsa-miR-200c-3p | <a href="#">XKR4</a>     | XK related 4                                                                                      |
| hsa-miR-200c-3p | <a href="#">ZCCHC24</a>  | zinc finger CCHC-type containing 24                                                               |
| hsa-miR-200c-3p | <a href="#">CNTN1</a>    | contactin 1                                                                                       |
| hsa-miR-200c-3p | <a href="#">SMARCD1</a>  | SWI/SNF related, matrix associated, actin dependent regulator of chromatin, subfamily d, member 1 |
| hsa-miR-200c-3p | <a href="#">NPM1</a>     | nucleophosmin 1                                                                                   |
| hsa-miR-200c-3p | <a href="#">ZSWIM4</a>   | zinc finger SWIM-type containing 4                                                                |
| hsa-miR-200c-3p | <a href="#">NCS1</a>     | neuronal calcium sensor 1                                                                         |
| hsa-miR-200c-3p | <a href="#">RO60</a>     | Ro60, Y RNA binding protein                                                                       |
| hsa-miR-200c-3p | <a href="#">PTAR1</a>    | protein prenyltransferase alpha subunit repeat containing 1                                       |
| hsa-miR-200c-3p | <a href="#">PLCL1</a>    | phospholipase C like 1 (inactive)                                                                 |
| hsa-miR-200c-3p | <a href="#">CYTH1</a>    | cytohesin 1                                                                                       |
| hsa-miR-200c-3p | <a href="#">TRHDE</a>    | thyrotropin releasing hormone degrading enzyme                                                    |
| hsa-miR-200c-3p | <a href="#">BCL11B</a>   | BCL11B, BAF complex component                                                                     |
| hsa-miR-200c-3p | <a href="#">EDEM3</a>    | ER degradation enhancing alpha-mannosidase like protein 3                                         |
| hsa-miR-200c-3p | <a href="#">FLII</a>     | FLII, actin remodeling protein                                                                    |
| hsa-miR-200c-3p | <a href="#">KRT80</a>    | keratin 80                                                                                        |
| hsa-miR-200c-3p | <a href="#">EIF2B5</a>   | eukaryotic translation initiation factor 2B subunit epsilon                                       |
| hsa-miR-200c-3p | <a href="#">FERMT2</a>   | fermitin family member 2                                                                          |
| hsa-miR-200c-3p | <a href="#">SERINC1</a>  | serine incorporator 1                                                                             |
| hsa-miR-200c-3p | <a href="#">ASAP1</a>    | ArfGAP with SH3 domain, ankyrin repeat and PH domain 1                                            |
| hsa-miR-200c-3p | <a href="#">RANBP10</a>  | RAN binding protein 10                                                                            |
| hsa-miR-200c-3p | <a href="#">RBFOX3</a>   | RNA binding fox-1 homolog 3                                                                       |
| hsa-miR-200c-3p | <a href="#">HMGB3</a>    | high mobility group box 3                                                                         |
| hsa-miR-200c-3p | <a href="#">GIC1</a>     | gap junction protein gamma 1                                                                      |
| hsa-miR-200c-3p | <a href="#">CORO1C</a>   | coronin 1C                                                                                        |
| hsa-miR-200c-3p | <a href="#">HOOK3</a>    | hook microtubule tethering protein 3                                                              |
| hsa-miR-200c-3p | <a href="#">TAF12</a>    | TATA-box binding protein associated factor 12                                                     |
| hsa-miR-200c-3p | <a href="#">MARF1</a>    | meiosis regulator and mRNA stability factor 1                                                     |
| hsa-miR-200c-3p | <a href="#">NCK2</a>     | NCK adaptor protein 2                                                                             |
| hsa-miR-200c-3p | <a href="#">TSC22D2</a>  | TSC22 domain family member 2                                                                      |
| hsa-miR-200c-3p | <a href="#">CPED1</a>    | cadherin like and PC-esterase domain containing 1                                                 |
| hsa-miR-200c-3p | <a href="#">TBL1XR1</a>  | transducin beta like 1 X-linked receptor 1                                                        |
| hsa-miR-200c-3p | <a href="#">LRP1</a>     | LDL receptor related protein 1                                                                    |
| hsa-miR-200c-3p | <a href="#">FARP1</a>    | FERM, ARH/RhoGEF and pleckstrin domain protein 1                                                  |
| hsa-miR-200c-3p | <a href="#">WWC3</a>     | WWC family member 3                                                                               |
| hsa-miR-200c-3p | <a href="#">BNC2</a>     | basonuclein 2                                                                                     |
| hsa-miR-200c-3p | <a href="#">PHEX</a>     | phosphate regulating endopeptidase homolog X-linked                                               |
| hsa-miR-200c-3p | <a href="#">PKIA</a>     | cAMP-dependent protein kinase inhibitor alpha                                                     |

|                 |                          |                                                         |
|-----------------|--------------------------|---------------------------------------------------------|
| hsa-miR-200c-3p | <a href="#">RAP1B</a>    | RAP1B, member of RAS oncogene family                    |
| hsa-miR-200c-3p | <a href="#">PTH1H</a>    | parathyroid hormone like hormone                        |
| hsa-miR-200c-3p | <a href="#">UHRF1BP1</a> | UHRF1 binding protein 1                                 |
| hsa-miR-200c-3p | <a href="#">GPR180</a>   | G protein-coupled receptor 180                          |
| hsa-miR-200c-3p | <a href="#">C11orf87</a> | chromosome 11 open reading frame 87                     |
| hsa-miR-200c-3p | <a href="#">CLASP2</a>   | cytoplasmic linker associated protein 2                 |
| hsa-miR-200c-3p | <a href="#">KLF4</a>     | Kruppel like factor 4                                   |
| hsa-miR-200c-3p | <a href="#">SCRT2</a>    | scratch family transcriptional repressor 2              |
| hsa-miR-200c-3p | <a href="#">RPS6KA3</a>  | ribosomal protein S6 kinase A3                          |
| hsa-miR-200c-3p | <a href="#">GPATCH8</a>  | G-patch domain containing 8                             |
| hsa-miR-200c-3p | <a href="#">GEM</a>      | GTP binding protein overexpressed in skeletal muscle    |
| hsa-miR-200c-3p | <a href="#">ZDHHC21</a>  | zinc finger DHHC-type containing 21                     |
| hsa-miR-200c-3p | <a href="#">EXOGE</a>    | exo/endonuclease G                                      |
| hsa-miR-200c-3p | <a href="#">SGCE</a>     | sarcoglycan epsilon                                     |
| hsa-miR-200c-3p | <a href="#">SLITRK1</a>  | SLIT and NTRK like family member 1                      |
| hsa-miR-200c-3p | <a href="#">WASF1</a>    | WAS protein family member 1                             |
| hsa-miR-200c-3p | <a href="#">INSM2</a>    | INSM transcriptional repressor 2                        |
| hsa-miR-200c-3p | <a href="#">FLI1</a>     | Fli-1 proto-oncogene, ETS transcription factor          |
| hsa-miR-200c-3p | <a href="#">FAM118B</a>  | family with sequence similarity 118 member B            |
| hsa-miR-200c-3p | <a href="#">ERIC4</a>    | glutamate rich 4                                        |
| hsa-miR-200c-3p | <a href="#">SIX1</a>     | SIX homeobox 1                                          |
| hsa-miR-200c-3p | <a href="#">TMEM136</a>  | transmembrane protein 136                               |
| hsa-miR-200c-3p | <a href="#">GTPBP10</a>  | GTP binding protein 10                                  |
| hsa-miR-200c-3p | <a href="#">CHRNA6</a>   | cholinergic receptor nicotinic alpha 6 subunit          |
| hsa-miR-200c-3p | <a href="#">EXD2</a>     | exonuclease 3'-5' domain containing 2                   |
| hsa-miR-200c-3p | <a href="#">TLN1</a>     | talin 1                                                 |
| hsa-miR-200c-3p | <a href="#">SNRNPB2</a>  | small nuclear ribonucleoprotein polypeptide B2          |
| hsa-miR-200c-3p | <a href="#">ZC3H4</a>    | zinc finger CCH-type containing 4                       |
| hsa-miR-200c-3p | <a href="#">PI4KB</a>    | phosphatidylinositol 4-kinase beta                      |
| hsa-miR-200c-3p | <a href="#">SLC39A14</a> | solute carrier family 39 member 14                      |
| hsa-miR-200c-3p | <a href="#">PPP2R1B</a>  | protein phosphatase 2 scaffold subunit Abeta            |
| hsa-miR-200c-3p | <a href="#">NUDT4</a>    | nudix hydrolase 4                                       |
| hsa-miR-200c-3p | <a href="#">PDIK1L</a>   | PDLIM1 interacting kinase 1 like                        |
| hsa-miR-200c-3p | <a href="#">UBE2R2</a>   | ubiquitin conjugating enzyme E2 R2                      |
| hsa-miR-200c-3p | <a href="#">CDYL2</a>    | chromodomain Y like 2                                   |
| hsa-miR-200c-3p | <a href="#">FIGN</a>     | fidgetin, microtubule severing factor                   |
| hsa-miR-200c-3p | <a href="#">LIN7A</a>    | lin-7 homolog A, crumbs cell polarity complex component |
| hsa-miR-200c-3p | <a href="#">RRP15</a>    | ribosomal RNA processing 15 homolog                     |
| hsa-miR-200c-3p | <a href="#">HIPK1</a>    | homeodomain interacting protein kinase 1                |
| hsa-miR-200c-3p | <a href="#">SRI</a>      | sorcin                                                  |
| hsa-miR-200c-3p | <a href="#">JKAMP</a>    | JNK1/MAPK8 associated membrane protein                  |
| hsa-miR-200c-3p | <a href="#">SDC2</a>     | syndecan 2                                              |
| hsa-miR-200c-3p | <a href="#">PTBP3</a>    | polypyrimidine tract binding protein 3                  |
| hsa-miR-200c-3p | <a href="#">CUX1</a>     | cut like homeobox 1                                     |
| hsa-miR-200c-3p | <a href="#">DACH1</a>    | dachshund family transcription factor 1                 |

|                 |                          |                                                                                      |
|-----------------|--------------------------|--------------------------------------------------------------------------------------|
| hsa-miR-200c-3p | <a href="#">PPP1R10</a>  | protein phosphatase 1 regulatory subunit 10                                          |
| hsa-miR-200c-3p | <a href="#">RDX</a>      | radixin                                                                              |
| hsa-miR-200c-3p | <a href="#">SLC35E2B</a> | solute carrier family 35 member E2B                                                  |
| hsa-miR-200c-3p | <a href="#">YWHAB</a>    | tyrosine 3-monooxygenase/tryptophan 5-monooxygenase activation protein beta          |
| hsa-miR-200c-3p | <a href="#">DDIT4L</a>   | DNA damage inducible transcript 4 like                                               |
| hsa-miR-200c-3p | <a href="#">SYVN1</a>    | synoviolin 1                                                                         |
| hsa-miR-200c-3p | <a href="#">DZIP1</a>    | DAZ interacting zinc finger protein 1                                                |
| hsa-miR-200c-3p | <a href="#">PPM1B</a>    | protein phosphatase, Mg <sup>2+</sup> /Mn <sup>2+</sup> dependent 1B                 |
| hsa-miR-200c-3p | <a href="#">SOX2</a>     | SRY-box 2                                                                            |
| hsa-miR-200c-3p | <a href="#">GLCCI1</a>   | glucocorticoid induced 1                                                             |
| hsa-miR-200c-3p | <a href="#">BDP1</a>     | B double prime 1, subunit of RNA polymerase III transcription initiation factor IIIB |
| hsa-miR-200c-3p | <a href="#">STRADE</a>   | STE20 related adaptor beta                                                           |
| hsa-miR-200c-3p | <a href="#">HS3ST3A1</a> | heparan sulfate-glucosamine 3-sulfotransferase 3A1                                   |
| hsa-miR-200c-3p | <a href="#">KIAA0355</a> | KIAA0355                                                                             |
| hsa-miR-200c-3p | <a href="#">SLF2</a>     | SMC5-SMC6 complex localization factor 2                                              |
| hsa-miR-200c-3p | <a href="#">ARHGAP20</a> | Rho GTPase activating protein 20                                                     |
| hsa-miR-200c-3p | <a href="#">IKZF2</a>    | IKAROS family zinc finger 2                                                          |
| hsa-miR-200c-3p | <a href="#">SLC35E2A</a> | solute carrier family 35 member E2A                                                  |
| hsa-miR-200c-3p | <a href="#">APOO</a>     | apolipoprotein O                                                                     |
| hsa-miR-200c-3p | <a href="#">SLC24A4</a>  | solute carrier family 24 member 4                                                    |
| hsa-miR-200c-3p | <a href="#">FSTL1</a>    | follistatin like 1                                                                   |
| hsa-miR-200c-3p | <a href="#">CASZ1</a>    | castor zinc finger 1                                                                 |
| hsa-miR-200c-3p | <a href="#">CTDSPL2</a>  | CTD small phosphatase like 2                                                         |
| hsa-miR-200c-3p | <a href="#">PCLAF</a>    | PCNA clamp associated factor                                                         |
| hsa-miR-200c-3p | <a href="#">FNDC3B</a>   | fibronectin type III domain containing 3B                                            |
| hsa-miR-200c-3p | <a href="#">A1CF</a>     | APOBEC1 complementation factor                                                       |
| hsa-miR-200c-3p | <a href="#">EIF4E2</a>   | eukaryotic translation initiation factor 4E family member 2                          |
| hsa-miR-200c-3p | <a href="#">NECTIN4</a>  | nectin cell adhesion molecule 4                                                      |
| hsa-miR-200c-3p | <a href="#">PPP1R9A</a>  | protein phosphatase 1 regulatory subunit 9A                                          |
| hsa-miR-200c-3p | <a href="#">SNX16</a>    | sorting nexin 16                                                                     |
| hsa-miR-200c-3p | <a href="#">GTF3C4</a>   | general transcription factor IIIC subunit 4                                          |
| hsa-miR-200c-3p | <a href="#">RGL1</a>     | ral guanine nucleotide dissociation stimulator like 1                                |
| hsa-miR-200c-3p | <a href="#">SUZ12</a>    | SUZ12, polycomb repressive complex 2 subunit                                         |
| hsa-miR-200c-3p | <a href="#">CHSY1</a>    | chondroitin sulfate synthase 1                                                       |
| hsa-miR-200c-3p | <a href="#">KANK2</a>    | KN motif and ankyrin repeat domains 2                                                |
| hsa-miR-200c-3p | <a href="#">GSTA4</a>    | glutathione S-transferase alpha 4                                                    |
| hsa-miR-200c-3p | <a href="#">CLVS2</a>    | clavesin 2                                                                           |
| hsa-miR-200c-3p | <a href="#">NPC1</a>     | NPC intracellular cholesterol transporter 1                                          |
| hsa-miR-200c-3p | <a href="#">PLXNC1</a>   | plexin C1                                                                            |
| hsa-miR-200c-3p | <a href="#">ARID4B</a>   | AT-rich interaction domain 4B                                                        |
| hsa-miR-200c-3p | <a href="#">TUBE</a>     | tubulin beta class I                                                                 |
| hsa-miR-200c-3p | <a href="#">NAB1</a>     | NGFI-A binding protein 1                                                             |
| hsa-miR-200c-3p | <a href="#">MBNL2</a>    | muscleblind like splicing regulator 2                                                |

|                 |                           |                                                                      |
|-----------------|---------------------------|----------------------------------------------------------------------|
| hsa-miR-200c-3p | <a href="#">BICC1</a>     | BicC family RNA binding protein 1                                    |
| hsa-miR-200c-3p | <a href="#">CEP97</a>     | centrosomal protein 97                                               |
| hsa-miR-200c-3p | <a href="#">ANK3</a>      | ankyrin 3                                                            |
| hsa-miR-200c-3p | <a href="#">MYZAP</a>     | myocardial zonula adherens protein                                   |
| hsa-miR-200c-3p | <a href="#">DPY19L3</a>   | dpy-19 like C-mannosyltransferase 3                                  |
| hsa-miR-200c-3p | <a href="#">SEMA3F</a>    | semaphorin 3F                                                        |
| hsa-miR-200c-3p | <a href="#">IGF2R</a>     | insulin like growth factor 2 receptor                                |
| hsa-miR-200c-3p | <a href="#">TAP2</a>      | transporter 2, ATP binding cassette subfamily B member               |
| hsa-miR-200c-3p | <a href="#">LEPR</a>      | leptin receptor                                                      |
| hsa-miR-200c-3p | <a href="#">CASR</a>      | calcium sensing receptor                                             |
| hsa-miR-200c-3p | <a href="#">DCUN1D5</a>   | defective in cullin neddylation 1 domain containing 5                |
| hsa-miR-200c-3p | <a href="#">HNRNPD</a>    | heterogeneous nuclear ribonucleoprotein D                            |
| hsa-miR-200c-3p | <a href="#">DENND1B</a>   | DENN domain containing 1B                                            |
| hsa-miR-200c-3p | <a href="#">MTF2</a>      | metal response element binding transcription factor 2                |
| hsa-miR-200c-3p | <a href="#">UBE2W</a>     | ubiquitin conjugating enzyme E2 W                                    |
| hsa-miR-200c-3p | <a href="#">TBCA</a>      | tubulin folding cofactor A                                           |
| hsa-miR-200c-3p | <a href="#">MYB</a>       | MYB proto-oncogene, transcription factor                             |
| hsa-miR-200c-3p | <a href="#">PLPPR4</a>    | phospholipid phosphatase related 4                                   |
| hsa-miR-200c-3p | <a href="#">TRIM23</a>    | tripartite motif containing 23                                       |
| hsa-miR-200c-3p | <a href="#">IER5</a>      | immediate early response 5                                           |
| hsa-miR-200c-3p | <a href="#">CCNE2</a>     | cyclin E2                                                            |
| hsa-miR-200c-3p | <a href="#">CRTAP</a>     | cartilage associated protein                                         |
| hsa-miR-200c-3p | <a href="#">NUFIP2</a>    | nuclear FMR1 interacting protein 2                                   |
| hsa-miR-200c-3p | <a href="#">SECISBP2L</a> | SECIS binding protein 2 like                                         |
| hsa-miR-200c-3p | <a href="#">NOTCH1</a>    | notch 1                                                              |
| hsa-miR-200c-3p | <a href="#">PRDM1</a>     | PR/SET domain 1                                                      |
| hsa-miR-200c-3p | <a href="#">ALDH1A1</a>   | aldehyde dehydrogenase 1 family member A1                            |
| hsa-miR-200c-3p | <a href="#">DNAJB14</a>   | DnaJ heat shock protein family (Hsp40) member B14                    |
| hsa-miR-200c-3p | <a href="#">GATA4</a>     | GATA binding protein 4                                               |
| hsa-miR-200c-3p | <a href="#">KIF14</a>     | kinesin family member 14                                             |
| hsa-miR-200c-3p | <a href="#">NYAP1</a>     | neuronal tyrosine phosphorylated phosphoinositide-3-kinase adaptor 1 |
| hsa-miR-200c-3p | <a href="#">SCN8A</a>     | sodium voltage-gated channel alpha subunit 8                         |
| hsa-miR-200c-3p | <a href="#">ATP6V0A2</a>  | ATPase H <sup>+</sup> transporting V0 subunit a2                     |
| hsa-miR-200c-3p | <a href="#">NRG1</a>      | neuregulin 1                                                         |
| hsa-miR-200c-3p | <a href="#">ACVR1C</a>    | activin A receptor type 1C                                           |
| hsa-miR-200c-3p | <a href="#">MTSS1L</a>    | MTSS1L, I-BAR domain containing                                      |
| hsa-miR-200c-3p | <a href="#">ADH1B</a>     | alcohol dehydrogenase 1B (class I), beta polypeptide                 |
| hsa-miR-200c-3p | <a href="#">GUCY1A1</a>   | guanylate cyclase 1 soluble subunit alpha 1                          |
| hsa-miR-200c-3p | <a href="#">SBSPON</a>    | somatomedin B and thrombospondin type 1 domain containing            |
| hsa-miR-200c-3p | <a href="#">PICALM</a>    | phosphatidylinositol binding clathrin assembly protein               |
| hsa-miR-200c-3p | <a href="#">KLF6</a>      | Kruppel like factor 6                                                |
| hsa-miR-200c-3p | <a href="#">CHMP5</a>     | charged multivesicular body protein 5                                |
| hsa-miR-200c-3p | <a href="#">EFNB2</a>     | ephrin B2                                                            |

|                 |                          |                                                           |
|-----------------|--------------------------|-----------------------------------------------------------|
| hsa-miR-200c-3p | <a href="#">MEX3D</a>    | mex-3 RNA binding family member D                         |
| hsa-miR-200c-3p | <a href="#">KCND2</a>    | potassium voltage-gated channel subfamily D member 2      |
| hsa-miR-200c-3p | <a href="#">SIKE1</a>    | suppressor of IKBKE 1                                     |
| hsa-miR-200c-3p | <a href="#">MSL2</a>     | MSL complex subunit 2                                     |
| hsa-miR-200c-3p | <a href="#">ZNF224</a>   | zinc finger protein 224                                   |
| hsa-miR-200c-3p | <a href="#">FRMD4B</a>   | FERM domain containing 4B                                 |
| hsa-miR-200c-3p | <a href="#">OXR1</a>     | oxidation resistance 1                                    |
| hsa-miR-200c-3p | <a href="#">CDH11</a>    | cadherin 11                                               |
| hsa-miR-200c-3p | <a href="#">IPO8</a>     | importin 8                                                |
| hsa-miR-200c-3p | <a href="#">BPTF</a>     | bromodomain PHD finger transcription factor               |
| hsa-miR-200c-3p | <a href="#">RSPRY1</a>   | ring finger and SPRY domain containing 1                  |
| hsa-miR-200c-3p | <a href="#">NDN</a>      | necdin, MAGE family member                                |
| hsa-miR-200c-3p | <a href="#">THSD7A</a>   | thrombospondin type 1 domain containing 7A                |
| hsa-miR-200c-3p | <a href="#">MMGT1</a>    | membrane magnesium transporter 1                          |
| hsa-miR-200c-3p | <a href="#">STX17</a>    | syntaxin 17                                               |
| hsa-miR-200c-3p | <a href="#">PHF6</a>     | PHD finger protein 6                                      |
| hsa-miR-200c-3p | <a href="#">ARHGEF17</a> | Rho guanine nucleotide exchange factor 17                 |
| hsa-miR-200c-3p | <a href="#">RABIF</a>    | RAB interacting factor                                    |
| hsa-miR-200c-3p | <a href="#">ETV5</a>     | ETS variant 5                                             |
| hsa-miR-200c-3p | <a href="#">CADM1</a>    | cell adhesion molecule 1                                  |
| hsa-miR-200c-3p | <a href="#">TMBIM4</a>   | transmembrane BAX inhibitor motif containing 4            |
| hsa-miR-200c-3p | <a href="#">ANLN</a>     | anillin actin binding protein                             |
| hsa-miR-200c-3p | <a href="#">NIN</a>      | ninein                                                    |
| hsa-miR-200c-3p | <a href="#">TAF9B</a>    | TATA-box binding protein associated factor 9b             |
| hsa-miR-200c-3p | <a href="#">BAG5</a>     | BCL2 associated athanogene 5                              |
| hsa-miR-200c-3p | <a href="#">PAPOLA</a>   | poly(A) polymerase alpha                                  |
| hsa-miR-200c-3p | <a href="#">UBQLN1</a>   | ubiquilin 1                                               |
| hsa-miR-200c-3p | <a href="#">SHROOM2</a>  | shroom family member 2                                    |
| hsa-miR-200c-3p | <a href="#">LAMC1</a>    | laminin subunit gamma 1                                   |
| hsa-miR-200c-3p | <a href="#">SYNCRIP</a>  | synaptotagmin binding cytoplasmic RNA interacting protein |
| hsa-miR-200c-3p | <a href="#">CPEB3</a>    | cytoplasmic polyadenylation element binding protein 3     |
| hsa-miR-200c-3p | <a href="#">DCT</a>      | dopachrome tautomerase                                    |
| hsa-miR-200c-3p | <a href="#">CYP11B1</a>  | cytochrome P450 family 11 subfamily B member 1            |
| hsa-miR-200c-3p | <a href="#">GPATCH2L</a> | G-patch domain containing 2 like                          |
| hsa-miR-200c-3p | <a href="#">ROBO2</a>    | roundabout guidance receptor 2                            |
| hsa-miR-200c-3p | <a href="#">XKR6</a>     | XK related 6                                              |
| hsa-miR-200c-3p | <a href="#">STXBP6</a>   | syntaxin binding protein 6                                |
| hsa-miR-200c-3p | <a href="#">SWAP70</a>   | switching B cell complex subunit SWAP70                   |
| hsa-miR-200c-3p | <a href="#">LATS2</a>    | large tumor suppressor kinase 2                           |
| hsa-miR-200c-3p | <a href="#">FYN</a>      | FYN proto-oncogene, Src family tyrosine kinase            |
| hsa-miR-200c-3p | <a href="#">PPP1CB</a>   | protein phosphatase 1 catalytic subunit beta              |
| hsa-miR-200c-3p | <a href="#">RIMKLB</a>   | ribosomal modification protein rimK like family member B  |
| hsa-miR-200c-3p | <a href="#">SASH1</a>    | SAM and SH3 domain containing 1                           |
| hsa-miR-200c-3p | <a href="#">NUP160</a>   | nucleoporin 160                                           |

|                 |                          |                                                         |
|-----------------|--------------------------|---------------------------------------------------------|
| hsa-miR-200c-3p | <a href="#">SHOX2</a>    | short stature homeobox 2                                |
| hsa-miR-200c-3p | <a href="#">HOXA5</a>    | homeobox A5                                             |
| hsa-miR-200c-3p | <a href="#">GABPA</a>    | GA binding protein transcription factor subunit alpha   |
| hsa-miR-200c-3p | <a href="#">SLC15A5</a>  | solute carrier family 15 member 5                       |
| hsa-miR-200c-3p | <a href="#">KANK1</a>    | KN motif and ankyrin repeat domains 1                   |
| hsa-miR-200c-3p | <a href="#">LMO7</a>     | LIM domain 7                                            |
| hsa-miR-200c-3p | <a href="#">TMA16</a>    | translation machinery associated 16 homolog             |
| hsa-miR-200c-3p | <a href="#">PCSK2</a>    | proprotein convertase subtilisin/kexin type 2           |
| hsa-miR-200c-3p | <a href="#">SH3GL1</a>   | SH3 domain containing GRB2 like 1, endophilin A2        |
| hsa-miR-200c-3p | <a href="#">SLC38A2</a>  | solute carrier family 38 member 2                       |
| hsa-miR-200c-3p | <a href="#">CNN3</a>     | calponin 3                                              |
| hsa-miR-200c-3p | <a href="#">ZNF302</a>   | zinc finger protein 302                                 |
| hsa-miR-200c-3p | <a href="#">RNF5</a>     | ring finger protein 5                                   |
| hsa-miR-200c-3p | <a href="#">FSIP1</a>    | fibrous sheath interacting protein 1                    |
| hsa-miR-200c-3p | <a href="#">LRRC58</a>   | leucine rich repeat containing 58                       |
| hsa-miR-200c-3p | <a href="#">CNTFR</a>    | ciliary neurotrophic factor receptor                    |
| hsa-miR-200c-3p | <a href="#">ZFHX4</a>    | zinc finger homeobox 4                                  |
| hsa-miR-200c-3p | <a href="#">ACACA</a>    | acetyl-CoA carboxylase alpha                            |
| hsa-miR-200c-3p | <a href="#">ELMOD1</a>   | ELMO domain containing 1                                |
| hsa-miR-200c-3p | <a href="#">CASP2</a>    | caspase 2                                               |
| hsa-miR-200c-3p | <a href="#">LCA5</a>     | LCA5, lebercilin                                        |
| hsa-miR-200c-3p | <a href="#">RAPGEF2</a>  | Rap guanine nucleotide exchange factor 2                |
| hsa-miR-200c-3p | <a href="#">IKBKB</a>    | inhibitor of nuclear factor kappa B kinase subunit beta |
| hsa-miR-200c-3p | <a href="#">SPTSSA</a>   | serine palmitoyltransferase small subunit A             |
| hsa-miR-200c-3p | <a href="#">FUNDCl</a>   | FUN14 domain containing 1                               |
| hsa-miR-200c-3p | <a href="#">UBXN8</a>    | UBX domain protein 8                                    |
| hsa-miR-200c-3p | <a href="#">NFIB</a>     | nuclear factor I B                                      |
| hsa-miR-200c-3p | <a href="#">USP18</a>    | ubiquitin specific peptidase 18                         |
| hsa-miR-200c-3p | <a href="#">TBCK</a>     | TBC1 domain containing kinase                           |
| hsa-miR-200c-3p | <a href="#">LARP1B</a>   | La ribonucleoprotein domain family member 1B            |
| hsa-miR-200c-3p | <a href="#">RNF180</a>   | ring finger protein 180                                 |
| hsa-miR-200c-3p | <a href="#">UBE2D1</a>   | ubiquitin conjugating enzyme E2 D1                      |
| hsa-miR-200c-3p | <a href="#">GTF2E1</a>   | general transcription factor IIE subunit 1              |
| hsa-miR-200c-3p | <a href="#">SBF1</a>     | SET binding factor 1                                    |
| hsa-miR-200c-3p | <a href="#">SIX3</a>     | SIX homeobox 3                                          |
| hsa-miR-200c-3p | <a href="#">UBA6</a>     | ubiquitin like modifier activating enzyme 6             |
| hsa-miR-200c-3p | <a href="#">PLK2</a>     | polo like kinase 2                                      |
| hsa-miR-200c-3p | <a href="#">SUPT20H</a>  | SPT20 homolog, SAGA complex component                   |
| hsa-miR-200c-3p | <a href="#">YAP1</a>     | Yes associated protein 1                                |
| hsa-miR-200c-3p | <a href="#">KLHL29</a>   | kelch like family member 29                             |
| hsa-miR-200c-3p | <a href="#">ZBTB20</a>   | zinc finger and BTB domain containing 20                |
| hsa-miR-200c-3p | <a href="#">C6orf120</a> | chromosome 6 open reading frame 120                     |
| hsa-miR-200c-3p | <a href="#">TRIM71</a>   | tripartite motif containing 71                          |
| hsa-miR-200c-3p | <a href="#">SLC16A2</a>  | solute carrier family 16 member 2                       |
| hsa-miR-200c-3p | <a href="#">GNAI3</a>    | G protein subunit alpha i3                              |



|                 |                          |                                                                           |
|-----------------|--------------------------|---------------------------------------------------------------------------|
| hsa-miR-200c-3p | <a href="#">EFNA1</a>    | ephrin A1                                                                 |
| hsa-miR-200c-3p | <a href="#">USP43</a>    | ubiquitin specific peptidase 43                                           |
| hsa-miR-200c-3p | <a href="#">PAK6</a>     | p21 (RAC1) activated kinase 6                                             |
| hsa-miR-200c-3p | <a href="#">KMT2C</a>    | lysine methyltransferase 2C                                               |
| hsa-miR-200c-3p | <a href="#">AMBRA1</a>   | autophagy and beclin 1 regulator 1                                        |
| hsa-miR-200c-3p | <a href="#">RASSF6</a>   | Ras association domain family member 6                                    |
| hsa-miR-200c-3p | <a href="#">EPHA5</a>    | EPH receptor A5                                                           |
| hsa-miR-200c-3p | <a href="#">KDSR</a>     | 3-ketodihydrosphingosine reductase                                        |
| hsa-miR-200c-3p | <a href="#">MSANTD2</a>  | Myb/SANT DNA binding domain containing 2                                  |
| hsa-miR-200c-3p | <a href="#">ZNF697</a>   | zinc finger protein 697                                                   |
| hsa-miR-200c-3p | <a href="#">PRKN</a>     | parkin RBR E3 ubiquitin protein ligase                                    |
| hsa-miR-200c-3p | <a href="#">CDR2</a>     | cerebellar degeneration related protein 2                                 |
| hsa-miR-200c-3p | <a href="#">ASH1L</a>    | ASH1 like histone lysine methyltransferase                                |
| hsa-miR-200c-3p | <a href="#">TIFA</a>     | TRAF interacting protein with forkhead associated domain                  |
| hsa-miR-200c-3p | <a href="#">SLC4A4</a>   | solute carrier family 4 member 4                                          |
| hsa-miR-200c-3p | <a href="#">TMEM164</a>  | transmembrane protein 164                                                 |
| hsa-miR-200c-3p | <a href="#">ANO5</a>     | anoctamin 5                                                               |
| hsa-miR-200c-3p | <a href="#">MXD4</a>     | MAX dimerization protein 4                                                |
| hsa-miR-200c-3p | <a href="#">NRXN1</a>    | neurexin 1                                                                |
| hsa-miR-200c-3p | <a href="#">TMX1</a>     | thioredoxin related transmembrane protein 1                               |
| hsa-miR-200c-3p | <a href="#">SLC39A8</a>  | solute carrier family 39 member 8                                         |
| hsa-miR-200c-3p | <a href="#">B4GALT6</a>  | beta-1,4-galactosyltransferase 6                                          |
| hsa-miR-200c-3p | <a href="#">GAB1</a>     | GRB2 associated binding protein 1                                         |
| hsa-miR-200c-3p | <a href="#">AAK1</a>     | AP2 associated kinase 1                                                   |
| hsa-miR-200c-3p | <a href="#">DNAJB6</a>   | DnaJ heat shock protein family (Hsp40) member B6                          |
| hsa-miR-200c-3p | <a href="#">STYX</a>     | serine/threonine/tyrosine interacting protein                             |
| hsa-miR-200c-3p | <a href="#">TAF4</a>     | TATA-box binding protein associated factor 4                              |
| hsa-miR-200c-3p | <a href="#">KCNMB1</a>   | potassium calcium-activated channel subfamily M regulatory beta subunit 1 |
| hsa-miR-200c-3p | <a href="#">RNF169</a>   | ring finger protein 169                                                   |
| hsa-miR-200c-3p | <a href="#">C4orf46</a>  | chromosome 4 open reading frame 46                                        |
| hsa-miR-200c-3p | <a href="#">FAM227A</a>  | family with sequence similarity 227 member A                              |
| hsa-miR-200c-3p | <a href="#">CPPED1</a>   | calcineurin like phosphoesterase domain containing 1                      |
| hsa-miR-200c-3p | <a href="#">ICK</a>      | intestinal cell kinase                                                    |
| hsa-miR-200c-3p | <a href="#">TMEM135</a>  | transmembrane protein 135                                                 |
| hsa-miR-200c-3p | <a href="#">TBC1D22B</a> | TBC1 domain family member 22B                                             |
| hsa-miR-200c-3p | <a href="#">CCDC186</a>  | coiled-coil domain containing 186                                         |
| hsa-miR-200c-3p | <a href="#">SLC35A2</a>  | solute carrier family 35 member A2                                        |
| hsa-miR-200c-3p | <a href="#">SEC24A</a>   | SEC24 homolog A, COPII coat complex component                             |
| hsa-miR-200c-3p | <a href="#">DNAJC10</a>  | DnaJ heat shock protein family (Hsp40) member C10                         |
| hsa-miR-200c-3p | <a href="#">GRAP2</a>    | GRB2 related adaptor protein 2                                            |
| hsa-miR-200c-3p | <a href="#">KPNA4</a>    | karyopherin subunit alpha 4                                               |
| hsa-miR-200c-3p | <a href="#">YTHDF3</a>   | YTH N6-methyladenosine RNA binding protein 3                              |
| hsa-miR-200c-3p | <a href="#">NCOA7</a>    | nuclear receptor coactivator 7                                            |

|                 |                             |                                                                 |
|-----------------|-----------------------------|-----------------------------------------------------------------|
| hsa-miR-200c-3p | <a href="#">FBXO22</a>      | F-box protein 22                                                |
| hsa-miR-200c-3p | <a href="#">UBE2I</a>       | ubiquitin conjugating enzyme E2 I                               |
| hsa-miR-200c-3p | <a href="#">ADRB2</a>       | adrenoceptor beta 2                                             |
| hsa-miR-200c-3p | <a href="#">MUL1</a>        | mitochondrial E3 ubiquitin protein ligase 1                     |
| hsa-miR-200c-3p | <a href="#">UBAC2</a>       | UBA domain containing 2                                         |
| hsa-miR-200c-3p | <a href="#">RAB8B</a>       | RAB8B, member RAS oncogene family                               |
| hsa-miR-200c-3p | <a href="#">RFTN2</a>       | raftlin family member 2                                         |
| hsa-miR-200c-3p | <a href="#">ADCY9</a>       | adenylate cyclase 9                                             |
| hsa-miR-200c-3p | <a href="#">PCDH7</a>       | protocadherin 7                                                 |
| hsa-miR-200c-3p | <a href="#">MIER3</a>       | MIER family member 3                                            |
| hsa-miR-200c-3p | <a href="#">PHACTR2</a>     | phosphatase and actin regulator 2                               |
| hsa-miR-200c-3p | <a href="#">CACUL1</a>      | CDK2 associated cullin domain 1                                 |
| hsa-miR-200c-3p | <a href="#">BLOC1S6</a>     | biogenesis of lysosomal organelles complex 1 subunit 6          |
| hsa-miR-200c-3p | <a href="#">SOX1</a>        | SRY-box 1                                                       |
| hsa-miR-200c-3p | <a href="#">KIAA1841</a>    | KIAA1841                                                        |
| hsa-miR-200c-3p | <a href="#">PRKAR1A</a>     | protein kinase cAMP-dependent type I regulatory subunit alpha   |
| hsa-miR-200c-3p | <a href="#">HTR2A</a>       | 5-hydroxytryptamine receptor 2A                                 |
| hsa-miR-200c-3p | <a href="#">FUT9</a>        | fucosyltransferase 9                                            |
| hsa-miR-200c-3p | <a href="#">ACVR2B</a>      | activin A receptor type 2B                                      |
| hsa-miR-200c-3p | <a href="#">LONRF2</a>      | LON peptidase N-terminal domain and ring finger 2               |
| hsa-miR-200c-3p | <a href="#">RRAS2</a>       | RAS related 2                                                   |
| hsa-miR-200c-3p | <a href="#">ENOX2</a>       | ecto-NOX disulfide-thiol exchanger 2                            |
| hsa-miR-200c-3p | <a href="#">ZFY</a>         | zinc finger protein Y-linked                                    |
| hsa-miR-200c-3p | <a href="#">TM7SF3</a>      | transmembrane 7 superfamily member 3                            |
| hsa-miR-200c-3p | <a href="#">MTMR6</a>       | myotubularin related protein 6                                  |
| hsa-miR-200c-3p | <a href="#">MAGEC2</a>      | MAGE family member C2                                           |
| hsa-miR-200c-3p | <a href="#">ZFR</a>         | zinc finger RNA binding protein                                 |
| hsa-miR-200c-3p | <a href="#">AP1AR</a>       | adaptor related protein complex 1 associated regulatory protein |
| hsa-miR-200c-3p | <a href="#">NCOA4</a>       | nuclear receptor coactivator 4                                  |
| hsa-miR-200c-3p | <a href="#">PSTPIP2</a>     | proline-serine-threonine phosphatase interacting protein 2      |
| hsa-miR-200c-3p | <a href="#">FUBP3</a>       | far upstream element binding protein 3                          |
| hsa-miR-200c-3p | <a href="#">SHCBP1</a>      | SHC binding and spindle associated 1                            |
| hsa-miR-200c-3p | <a href="#">TIAL1</a>       | TIA1 cytotoxic granule associated RNA binding protein like 1    |
| hsa-miR-200c-3p | <a href="#">MEX3B</a>       | mex-3 RNA binding family member B                               |
| hsa-miR-200c-3p | <a href="#">GPR173</a>      | G protein-coupled receptor 173                                  |
| hsa-miR-200c-3p | <a href="#">SYNC</a>        | syncoilin, intermediate filament protein                        |
| hsa-miR-200c-3p | <a href="#">GIGYF1</a>      | GRB10 interacting GYF protein 1                                 |
| hsa-miR-200c-3p | <a href="#">IQCI-SCHIP1</a> | IQCI-SCHIP1 readthrough                                         |
| hsa-miR-200c-3p | <a href="#">XG</a>          | Xg glycoprotein (Xg blood group)                                |
| hsa-miR-200c-3p | <a href="#">ZBTB8A</a>      | zinc finger and BTB domain containing 8A                        |
| hsa-miR-200c-3p | <a href="#">TMEM170B</a>    | transmembrane protein 170B                                      |

|                 |                          |                                                                        |
|-----------------|--------------------------|------------------------------------------------------------------------|
| hsa-miR-200c-3p | <a href="#">UTY</a>      | ubiquitously transcribed tetratricopeptide repeat containing, Y-linked |
| hsa-miR-200c-3p | <a href="#">EIF5B</a>    | eukaryotic translation initiation factor 5B                            |
| hsa-miR-200c-3p | <a href="#">NCAM1</a>    | neural cell adhesion molecule 1                                        |
| hsa-miR-200c-3p | <a href="#">PAIP2</a>    | poly(A) binding protein interacting protein 2                          |
| hsa-miR-200c-3p | <a href="#">RBFox1</a>   | RNA binding fox-1 homolog 1                                            |
| hsa-miR-200c-3p | <a href="#">SNAP25</a>   | synaptosome associated protein 25                                      |
| hsa-miR-200c-3p | <a href="#">EP300</a>    | E1A binding protein p300                                               |
| hsa-miR-200c-3p | <a href="#">CERS6</a>    | ceramide synthase 6                                                    |
| hsa-miR-200c-3p | <a href="#">GMFB</a>     | glia maturation factor beta                                            |
| hsa-miR-200c-3p | <a href="#">NFYA</a>     | nuclear transcription factor Y subunit alpha                           |
| hsa-miR-200c-3p | <a href="#">PARD3B</a>   | par-3 family cell polarity regulator beta                              |
| hsa-miR-200c-3p | <a href="#">HNF1B</a>    | HNF1 homeobox B                                                        |
| hsa-miR-200c-3p | <a href="#">MARCH8</a>   | membrane associated ring-CH-type finger 8                              |
| hsa-miR-200c-3p | <a href="#">ZDHHC17</a>  | zinc finger DHHC-type containing 17                                    |
| hsa-miR-200c-3p | <a href="#">C5orf24</a>  | chromosome 5 open reading frame 24                                     |
| hsa-miR-200c-3p | <a href="#">WDR91</a>    | WD repeat domain 91                                                    |
| hsa-miR-200c-3p | <a href="#">COG6</a>     | component of oligomeric golgi complex 6                                |
| hsa-miR-200c-3p | <a href="#">MSTN</a>     | myostatin                                                              |
| hsa-miR-200c-3p | <a href="#">CREBBP</a>   | CREB binding protein                                                   |
| hsa-miR-200c-3p | <a href="#">NDNF</a>     | neuron derived neurotrophic factor                                     |
| hsa-miR-200c-3p | <a href="#">OPRM1</a>    | opioid receptor mu 1                                                   |
| hsa-miR-200c-3p | <a href="#">CALU</a>     | calumenin                                                              |
| hsa-miR-200c-3p | <a href="#">RSRC2</a>    | arginine and serine rich coiled-coil 2                                 |
| hsa-miR-200c-3p | <a href="#">LPAR1</a>    | lysophosphatidic acid receptor 1                                       |
| hsa-miR-200c-3p | <a href="#">PTPN22</a>   | protein tyrosine phosphatase, non-receptor type 22                     |
| hsa-miR-200c-3p | <a href="#">RHOT1</a>    | ras homolog family member T1                                           |
| hsa-miR-200c-3p | <a href="#">N4BP2</a>    | NEDD4 binding protein 2                                                |
| hsa-miR-200c-3p | <a href="#">RNF38</a>    | ring finger protein 38                                                 |
| hsa-miR-200c-3p | <a href="#">RBM26</a>    | RNA binding motif protein 26                                           |
| hsa-miR-200c-3p | <a href="#">SLTM</a>     | SAFB like transcription modulator                                      |
| hsa-miR-200c-3p | <a href="#">CLOCK</a>    | clock circadian regulator                                              |
| hsa-miR-200c-3p | <a href="#">CDC73</a>    | cell division cycle 73                                                 |
| hsa-miR-200c-3p | <a href="#">PLS3</a>     | plastin 3                                                              |
| hsa-miR-200c-3p | <a href="#">ADCY2</a>    | adenylate cyclase 2                                                    |
| hsa-miR-200c-3p | <a href="#">CALN1</a>    | calneuron 1                                                            |
| hsa-miR-200c-3p | <a href="#">C15orf40</a> | chromosome 15 open reading frame 40                                    |
| hsa-miR-200c-3p | <a href="#">TP73</a>     | tumor protein p73                                                      |
| hsa-miR-200c-3p | <a href="#">FRMD4A</a>   | FERM domain containing 4A                                              |
| hsa-miR-200c-3p | <a href="#">TMEM170A</a> | transmembrane protein 170A                                             |
| hsa-miR-200c-3p | <a href="#">DCAF17</a>   | DDB1 and CUL4 associated factor 17                                     |
| hsa-miR-200c-3p | <a href="#">ANGEL2</a>   | angel homolog 2                                                        |
| hsa-miR-200c-3p | <a href="#">RPRD1A</a>   | regulation of nuclear pre-mRNA domain containing 1A                    |
| hsa-miR-200c-3p | <a href="#">EHD1</a>     | EH domain containing 1                                                 |
| hsa-miR-200c-3p | <a href="#">ACADSB</a>   | acyl-CoA dehydrogenase short/branched chain                            |

|                 |                          |                                                            |
|-----------------|--------------------------|------------------------------------------------------------|
| hsa-miR-200c-3p | <a href="#">ARL15</a>    | ADP ribosylation factor like GTPase 15                     |
| hsa-miR-200c-3p | <a href="#">ALG2</a>     | ALG2, alpha-1,3/1,6-mannosyltransferase                    |
| hsa-miR-200c-3p | <a href="#">PALM2</a>    | paralemmin 2                                               |
| hsa-miR-200c-3p | <a href="#">PPWD1</a>    | peptidylprolyl isomerase domain and WD repeat containing 1 |
| hsa-miR-200c-3p | <a href="#">SRP72</a>    | signal recognition particle 72                             |
| hsa-miR-200c-3p | <a href="#">ARGLU1</a>   | arginine and glutamate rich 1                              |
| hsa-miR-200c-3p | <a href="#">TMEM33</a>   | transmembrane protein 33                                   |
| hsa-miR-200c-3p | <a href="#">PPARA</a>    | peroxisome proliferator activated receptor alpha           |
| hsa-miR-200c-3p | <a href="#">PTGER2</a>   | prostaglandin E receptor 2                                 |
| hsa-miR-200c-3p | <a href="#">C19orf12</a> | chromosome 19 open reading frame 12                        |
| hsa-miR-200c-3p | <a href="#">BAG6</a>     | BCL2 associated athanogene 6                               |
| hsa-miR-200c-3p | <a href="#">TLL2</a>     | tolloid like 2                                             |
| hsa-miR-200c-3p | <a href="#">ANKRD33B</a> | ankyrin repeat domain 33B                                  |
| hsa-miR-200c-3p | <a href="#">PNISR</a>    | PNN interacting serine and arginine rich protein           |
| hsa-miR-200c-3p | <a href="#">DOCK4</a>    | dedicator of cytokinesis 4                                 |
| hsa-miR-200c-3p | <a href="#">MTMR9</a>    | myotubularin related protein 9                             |
| hsa-miR-200c-3p | <a href="#">ZNF557</a>   | zinc finger protein 557                                    |
| hsa-miR-200c-3p | <a href="#">C2CD6</a>    | C2 calcium dependent domain containing 6                   |
| hsa-miR-200c-3p | <a href="#">FAM81A</a>   | family with sequence similarity 81 member A                |
| hsa-miR-200c-3p | <a href="#">FASTKD3</a>  | FAST kinase domains 3                                      |
| hsa-miR-200c-3p | <a href="#">TMEM245</a>  | transmembrane protein 245                                  |
| hsa-miR-200c-3p | <a href="#">MON2</a>     | MON2 homolog, regulator of endosome-to-Golgi trafficking   |
| hsa-miR-200c-3p | <a href="#">MXD3</a>     | MAX dimerization protein 3                                 |
| hsa-miR-200c-3p | <a href="#">KIF11</a>    | kinesin family member 11                                   |
| hsa-miR-200c-3p | <a href="#">AFF4</a>     | AF4/FMR2 family member 4                                   |
| hsa-miR-200c-3p | <a href="#">SLC6A15</a>  | solute carrier family 6 member 15                          |
| hsa-miR-200c-3p | <a href="#">CNST</a>     | consortin, connexin sorting protein                        |
| hsa-miR-200c-3p | <a href="#">PPP2CA</a>   | protein phosphatase 2 catalytic subunit alpha              |
| hsa-miR-200c-3p | <a href="#">CTNND2</a>   | catenin delta 2                                            |
| hsa-miR-200c-3p | <a href="#">PHC3</a>     | polyhomeotic homolog 3                                     |
| hsa-miR-200c-3p | <a href="#">ORMDL3</a>   | ORMDL sphingolipid biosynthesis regulator 3                |
| hsa-miR-200c-3p | <a href="#">SRF</a>      | serum response factor                                      |
| hsa-miR-200c-3p | <a href="#">CASK</a>     | calcium/calmodulin dependent serine protein kinase         |
| hsa-miR-200c-3p | <a href="#">LCORL</a>    | ligand dependent nuclear receptor corepressor like         |
| hsa-miR-200c-3p | <a href="#">YPEL1</a>    | yippee like 1                                              |
| hsa-miR-200c-3p | <a href="#">GABRB3</a>   | gamma-aminobutyric acid type A receptor beta3 subunit      |
| hsa-miR-200c-3p | <a href="#">TFPI</a>     | tissue factor pathway inhibitor                            |
| hsa-miR-200c-3p | <a href="#">UNC80</a>    | unc-80 homolog, NALCN channel complex subunit              |
| hsa-miR-200c-3p | <a href="#">MKLN1</a>    | muskelin 1                                                 |
| hsa-miR-200c-3p | <a href="#">STARD13</a>  | StAR related lipid transfer domain containing 13           |
| hsa-miR-200c-3p | <a href="#">BPY2C</a>    | basic charge Y-linked 2C                                   |
| hsa-miR-200c-3p | <a href="#">MAMDC2</a>   | MAM domain containing 2                                    |
| hsa-miR-200c-3p | <a href="#">BPY2B</a>    | basic charge Y-linked 2B                                   |

|                 |                                |                                                               |
|-----------------|--------------------------------|---------------------------------------------------------------|
| hsa-miR-200c-3p | <a href="#">SSR3</a>           | signal sequence receptor subunit 3                            |
| hsa-miR-200c-3p | <a href="#">SLC25A27</a>       | solute carrier family 25 member 27                            |
| hsa-miR-200c-3p | <a href="#">FUT4</a>           | fucosyltransferase 4                                          |
| hsa-miR-200c-3p | <a href="#">LFNG</a>           | LFNG O-fucosylpeptide 3-beta-N-acetylglucosaminyltransferase  |
| hsa-miR-200c-3p | <a href="#">UBE2V1</a>         | ubiquitin conjugating enzyme E2 V1                            |
| hsa-miR-200c-3p | <a href="#">FHOD1</a>          | formin homology 2 domain containing 1                         |
| hsa-miR-200c-3p | <a href="#">SYT1</a>           | synaptotagmin 1                                               |
| hsa-miR-200c-3p | <a href="#">TIGAR</a>          | TP53 induced glycolysis regulatory phosphatase                |
| hsa-miR-200c-3p | <a href="#">NPAP1</a>          | nuclear pore associated protein 1                             |
| hsa-miR-200c-3p | <a href="#">FBXW11</a>         | F-box and WD repeat domain containing 11                      |
| hsa-miR-200c-3p | <a href="#">DSG1</a>           | desmoglein 1                                                  |
| hsa-miR-200c-3p | <a href="#">LETM2</a>          | leucine zipper and EF-hand containing transmembrane protein 2 |
| hsa-miR-200c-3p | <a href="#">MYT1</a>           | myelin transcription factor 1                                 |
| hsa-miR-200c-3p | <a href="#">TAB3</a>           | TGF-beta activated kinase 1 (MAP3K7) binding protein 3        |
| hsa-miR-200c-3p | <a href="#">PCNX1</a>          | pecanex 1                                                     |
| hsa-miR-200c-3p | <a href="#">ZNF292</a>         | zinc finger protein 292                                       |
| hsa-miR-200c-3p | <a href="#">TBX5</a>           | T-box 5                                                       |
| hsa-miR-200c-3p | <a href="#">BPY2</a>           | basic charge Y-linked 2                                       |
| hsa-miR-200c-3p | <a href="#">MMD2</a>           | monocyte to macrophage differentiation associated 2           |
| hsa-miR-200c-3p | <a href="#">RAC1</a>           | Rac family small GTPase 1                                     |
| hsa-miR-200c-3p | <a href="#">TMEM189-UBE2V1</a> | TMEM189-UBE2V1 readthrough                                    |
| hsa-miR-200c-3p | <a href="#">STAM2</a>          | signal transducing adaptor molecule 2                         |
| hsa-miR-200c-3p | <a href="#">CHST2</a>          | carbohydrate sulfotransferase 2                               |
| hsa-miR-200c-3p | <a href="#">GLRX3</a>          | glutaredoxin 3                                                |
| hsa-miR-200c-3p | <a href="#">NLGN4X</a>         | neuroligin 4 X-linked                                         |
| hsa-miR-200c-3p | <a href="#">BTF3L4</a>         | basic transcription factor 3 like 4                           |
| hsa-miR-200c-3p | <a href="#">SOWAHC</a>         | sosondowah ankyrin repeat domain family member C              |
| hsa-miR-200c-3p | <a href="#">SGPP1</a>          | sphingosine-1-phosphate phosphatase 1                         |
| hsa-miR-200c-3p | <a href="#">PRRG4</a>          | proline rich and Gla domain 4                                 |
| hsa-miR-200c-3p | <a href="#">ZC3H12B</a>        | zinc finger CCCH-type containing 12B                          |
| hsa-miR-200c-3p | <a href="#">NPTX1</a>          | neuronal pentraxin 1                                          |
| hsa-miR-200c-3p | <a href="#">TMEM167A</a>       | transmembrane protein 167A                                    |
| hsa-miR-200c-3p | <a href="#">HNRNPH3</a>        | heterogeneous nuclear ribonucleoprotein H3                    |
| hsa-miR-200c-3p | <a href="#">MTFR1</a>          | mitochondrial fission regulator 1                             |
| hsa-miR-200c-3p | <a href="#">RBL1</a>           | RB transcriptional corepressor like 1                         |
| hsa-miR-200c-3p | <a href="#">ELL</a>            | elongation factor for RNA polymerase II                       |
| hsa-miR-200c-3p | <a href="#">TBX22</a>          | T-box 22                                                      |
| hsa-miR-200c-3p | <a href="#">RLF</a>            | rearranged L-myc fusion                                       |
| hsa-miR-200c-3p | <a href="#">CNTN4</a>          | contactin 4                                                   |
| hsa-miR-200c-3p | <a href="#">C6orf62</a>        | chromosome 6 open reading frame 62                            |
| hsa-miR-200c-3p | <a href="#">CADM2</a>          | cell adhesion molecule 2                                      |
| hsa-miR-200c-3p | <a href="#">CNOT6L</a>         | CCR4-NOT transcription complex subunit 6 like                 |

|                 |                         |                                                         |
|-----------------|-------------------------|---------------------------------------------------------|
| hsa-miR-200c-3p | <a href="#">PMM1</a>    | phosphomannomutase 1                                    |
| hsa-miR-200c-3p | <a href="#">DIRAS2</a>  | DIRAS family GTPase 2                                   |
| hsa-miR-200c-3p | <a href="#">SHC4</a>    | SHC adaptor protein 4                                   |
| hsa-miR-200c-3p | <a href="#">TJAP1</a>   | tight junction associated protein 1                     |
| hsa-miR-200c-3p | <a href="#">RBM12B</a>  | RNA binding motif protein 12B                           |
| hsa-miR-200c-3p | <a href="#">LATS1</a>   | large tumor suppressor kinase 1                         |
| hsa-miR-200c-3p | <a href="#">EIF5A2</a>  | eukaryotic translation initiation factor 5A2            |
| hsa-miR-200c-3p | <a href="#">UGCG</a>    | UDP-glucose ceramide glucosyltransferase                |
| hsa-miR-200c-3p | <a href="#">RAB33B</a>  | RAB33B, member RAS oncogene family                      |
| hsa-miR-200c-3p | <a href="#">ZNF605</a>  | zinc finger protein 605                                 |
| hsa-miR-200c-3p | <a href="#">PLOD2</a>   | procollagen-lysine,2-oxoglutarate 5-dioxygenase 2       |
| hsa-miR-200c-3p | <a href="#">NSD2</a>    | nuclear receptor binding SET domain protein 2           |
| hsa-miR-200c-3p | <a href="#">PHLDB1</a>  | pleckstrin homology like domain family B member 1       |
| hsa-miR-200c-3p | <a href="#">SRSF1</a>   | serine and arginine rich splicing factor 1              |
| hsa-miR-200c-3p | <a href="#">RPL22L1</a> | ribosomal protein L22 like 1                            |
| hsa-miR-200c-3p | <a href="#">ARFGEF3</a> | ARFGEF family member 3                                  |
| hsa-miR-200c-3p | <a href="#">CYP1B1</a>  | cytochrome P450 family 1 subfamily B member 1           |
| hsa-miR-200c-3p | <a href="#">NGEF</a>    | neuronal guanine nucleotide exchange factor             |
| hsa-miR-200c-3p | <a href="#">TSTD3</a>   | thiosulfate sulfurtransferase like domain containing 3  |
| hsa-miR-200c-3p | <a href="#">EFHC2</a>   | EF-hand domain containing 2                             |
| hsa-miR-200c-3p | <a href="#">PAK3</a>    | p21 (RAC1) activated kinase 3                           |
| hsa-miR-200c-3p | <a href="#">SLC23A2</a> | solute carrier family 23 member 2                       |
| hsa-miR-200c-3p | <a href="#">KLRF1</a>   | killer cell lectin like receptor F1                     |
| hsa-miR-200c-3p | <a href="#">ESM1</a>    | endothelial cell specific molecule 1                    |
| hsa-miR-200c-3p | <a href="#">MED6</a>    | mediator complex subunit 6                              |
| hsa-miR-200c-3p | <a href="#">SLC6A17</a> | solute carrier family 6 member 17                       |
| hsa-miR-200c-3p | <a href="#">PPP2R2C</a> | protein phosphatase 2 regulatory subunit Bgamma         |
| hsa-miR-200c-3p | <a href="#">FAR2</a>    | fatty acyl-CoA reductase 2                              |
| hsa-miR-200c-3p | <a href="#">ZNF652</a>  | zinc finger protein 652                                 |
| hsa-miR-200c-3p | <a href="#">LIN28B</a>  | lin-28 homolog B                                        |
| hsa-miR-200c-3p | <a href="#">LCOR</a>    | ligand dependent nuclear receptor corepressor           |
| hsa-miR-200c-3p | <a href="#">CALCR</a>   | calcitonin receptor                                     |
| hsa-miR-200c-3p | <a href="#">ALDH1A3</a> | aldehyde dehydrogenase 1 family member A3               |
| hsa-miR-200c-3p | <a href="#">UBN2</a>    | ubinuclein 2                                            |
| hsa-miR-200c-3p | <a href="#">BTBD18</a>  | BTB domain containing 18                                |
| hsa-miR-200c-3p | <a href="#">PDLIM5</a>  | PDZ and LIM domain 5                                    |
| hsa-miR-200c-3p | <a href="#">PAK5</a>    | p21 (RAC1) activated kinase 5                           |
| hsa-miR-200c-3p | <a href="#">MSR1</a>    | macrophage scavenger receptor 1                         |
| hsa-miR-200c-3p | <a href="#">GPX6</a>    | glutathione peroxidase 6                                |
| hsa-miR-200c-3p | <a href="#">HIPK2</a>   | homeodomain interacting protein kinase 2                |
| hsa-miR-200c-3p | <a href="#">SIRPA</a>   | signal regulatory protein alpha                         |
| hsa-miR-200c-3p | <a href="#">SLC35F4</a> | solute carrier family 35 member F4                      |
| hsa-miR-200c-3p | <a href="#">IMY</a>     | junction mediating and regulatory protein, p53 cofactor |
| hsa-miR-200c-3p | <a href="#">ASF1A</a>   | anti-silencing function 1A histone chaperone            |
| hsa-miR-200c-3p | <a href="#">INPP4A</a>  | inositol polyphosphate-4-phosphatase type I A           |



|                 |                           |                                                               |
|-----------------|---------------------------|---------------------------------------------------------------|
| hsa-miR-200c-3p | <a href="#">SNAI2</a>     | snail family transcriptional repressor 2                      |
| hsa-miR-200c-3p | <a href="#">LPIN1</a>     | lipin 1                                                       |
| hsa-miR-200c-3p | <a href="#">TERF1</a>     | telomeric repeat binding factor 1                             |
| hsa-miR-200c-3p | <a href="#">RUNX1T1</a>   | RUNX1 translocation partner 1                                 |
| hsa-miR-200c-3p | <a href="#">TAOK1</a>     | TAO kinase 1                                                  |
| hsa-miR-200c-3p | <a href="#">TXLNG</a>     | taxilin gamma                                                 |
| hsa-miR-200c-3p | <a href="#">NPNT</a>      | nephronectin                                                  |
| hsa-miR-200c-3p | <a href="#">MAPK1IP1L</a> | mitogen-activated protein kinase 1 interacting protein 1 like |
| hsa-miR-200c-3p | <a href="#">SH3PXD2A</a>  | SH3 and PX domains 2A                                         |
| hsa-miR-200c-3p | <a href="#">ZNF555</a>    | zinc finger protein 555                                       |
| hsa-miR-200c-3p | <a href="#">ASXL3</a>     | ASXL transcriptional regulator 3                              |
| hsa-miR-200c-3p | <a href="#">PCNP</a>      | PEST proteolytic signal containing nuclear protein            |
| hsa-miR-200c-3p | <a href="#">SHOC1</a>     | shortage in chiasmata 1                                       |
| hsa-miR-200c-3p | <a href="#">ZNF181</a>    | zinc finger protein 181                                       |
| hsa-miR-200c-3p | <a href="#">PIP4K2B</a>   | phosphatidylinositol-5-phosphate 4-kinase type 2 beta         |
| hsa-miR-200c-3p | <a href="#">PLEKHM3</a>   | pleckstrin homology domain containing M3                      |
| hsa-miR-200c-3p | <a href="#">NCOA3</a>     | nuclear receptor coactivator 3                                |
| hsa-miR-200c-3p | <a href="#">ARHGAP19</a>  | Rho GTPase activating protein 19                              |
| hsa-miR-200c-3p | <a href="#">FXR2</a>      | FMR1 autosomal homolog 2                                      |
| hsa-miR-200c-3p | <a href="#">SNX13</a>     | sorting nexin 13                                              |
| hsa-miR-200c-3p | <a href="#">PLCG1</a>     | phospholipase C gamma 1                                       |
| hsa-miR-200c-3p | <a href="#">PHF21A</a>    | PHD finger protein 21A                                        |
| hsa-miR-200c-3p | <a href="#">GIN1</a>      | gypsy retrotransposon integrase 1                             |
| hsa-miR-200c-3p | <a href="#">TRAM1L1</a>   | translocation associated membrane protein 1 like 1            |
| hsa-miR-200c-3p | <a href="#">THAP5</a>     | THAP domain containing 5                                      |
| hsa-miR-200c-3p | <a href="#">SNAPC1</a>    | small nuclear RNA activating complex polypeptide 1            |
| hsa-miR-200c-3p | <a href="#">C2orf49</a>   | chromosome 2 open reading frame 49                            |
| hsa-miR-200c-3p | <a href="#">TPCN1</a>     | two pore segment channel 1                                    |
| hsa-miR-200c-3p | <a href="#">PTS</a>       | 6-pyruvoyltetrahydropterin synthase                           |
| hsa-miR-200c-3p | <a href="#">PARD6B</a>    | par-6 family cell polarity regulator beta                     |
| hsa-miR-200c-3p | <a href="#">CDK15</a>     | cyclin dependent kinase 15                                    |
| hsa-miR-200c-3p | <a href="#">THRB</a>      | thyroid hormone receptor beta                                 |
| hsa-miR-200c-3p | <a href="#">MPP4</a>      | membrane palmitoylated protein 4                              |
| hsa-miR-200c-3p | <a href="#">RELN</a>      | reelin                                                        |
| hsa-miR-200c-3p | <a href="#">ZNF516</a>    | zinc finger protein 516                                       |
| hsa-miR-200c-3p | <a href="#">KLK7</a>      | kallikrein related peptidase 7                                |
| hsa-miR-200c-3p | <a href="#">PAX6</a>      | paired box 6                                                  |
| hsa-miR-200c-3p | <a href="#">KLHL31</a>    | kelch like family member 31                                   |
| hsa-miR-200c-3p | <a href="#">NCOR2</a>     | nuclear receptor corepressor 2                                |
| hsa-miR-200c-3p | <a href="#">KCTD15</a>    | potassium channel tetramerization domain containing 15        |
| hsa-miR-200c-3p | <a href="#">PSPH</a>      | phosphoserine phosphatase                                     |
| hsa-miR-200c-3p | <a href="#">PIN1</a>      | peptidylprolyl cis/trans isomerase, NIMA-interacting 1        |
| hsa-miR-200c-3p | <a href="#">CHD2</a>      | chromodomain helicase DNA binding protein 2                   |
| hsa-miR-200c-3p | <a href="#">MAP1LC3B</a>  | microtubule associated protein 1 light chain 3 beta           |

|                 |                         |                                                                  |
|-----------------|-------------------------|------------------------------------------------------------------|
| hsa-miR-200c-3p | <a href="#">HPS5</a>    | HPS5, biogenesis of lysosomal organelles complex 2 subunit 2     |
| hsa-miR-200c-3p | <a href="#">TMCC1</a>   | transmembrane and coiled-coil domain family 1                    |
| hsa-miR-200c-3p | <a href="#">PLPPR1</a>  | phospholipid phosphatase related 1                               |
| hsa-miR-200c-3p | <a href="#">LYRM2</a>   | LYR motif containing 2                                           |
| hsa-miR-200c-3p | <a href="#">FAM169A</a> | family with sequence similarity 169 member A                     |
| hsa-miR-200c-3p | <a href="#">ITPR1</a>   | inositol 1,4,5-trisphosphate receptor type 1                     |
| hsa-miR-200c-3p | <a href="#">HEG1</a>    | heart development protein with EGF like domains 1                |
| hsa-miR-200c-3p | <a href="#">CHST9</a>   | carbohydrate sulfotransferase 9                                  |
| hsa-miR-200c-3p | <a href="#">DMRT2</a>   | doublesex and mab-3 related transcription factor 2               |
| hsa-miR-200c-3p | <a href="#">PRKAR2B</a> | protein kinase cAMP-dependent type II regulatory subunit beta    |
| hsa-miR-200c-3p | <a href="#">TJP1</a>    | tight junction protein 1                                         |
| hsa-miR-200c-3p | <a href="#">FAM218A</a> | family with sequence similarity 218 member A                     |
| hsa-miR-200c-3p | <a href="#">IQSEC1</a>  | IQ motif and Sec7 domain 1                                       |
| hsa-miR-200c-3p | <a href="#">HS6ST2</a>  | heparan sulfate 6-O-sulfotransferase 2                           |
| hsa-miR-200c-3p | <a href="#">MYCN</a>    | MYCN proto-oncogene, bHLH transcription factor                   |
| hsa-miR-200c-3p | <a href="#">LY75</a>    | lymphocyte antigen 75                                            |
| hsa-miR-200c-3p | <a href="#">REV3L</a>   | REV3 like, DNA directed polymerase zeta catalytic subunit        |
| hsa-miR-200c-3p | <a href="#">ARIH2</a>   | ariadne RBR E3 ubiquitin protein ligase 2                        |
| hsa-miR-200c-3p | <a href="#">CHM</a>     | CHM, Rab escort protein 1                                        |
| hsa-miR-200c-3p | <a href="#">CSRNP3</a>  | cysteine and serine rich nuclear protein 3                       |
| hsa-miR-200c-3p | <a href="#">KCNK2</a>   | potassium two pore domain channel subfamily K member 2           |
| hsa-miR-200c-3p | <a href="#">MARCH1</a>  | membrane associated ring-CH-type finger 1                        |
| hsa-miR-200c-3p | <a href="#">ZNF274</a>  | zinc finger protein 274                                          |
| hsa-miR-200c-3p | <a href="#">NEGR1</a>   | neuronal growth regulator 1                                      |
| hsa-miR-200c-3p | <a href="#">STON2</a>   | stonin 2                                                         |
| hsa-miR-200c-3p | <a href="#">FCAR</a>    | Fc fragment of IgA receptor                                      |
| hsa-miR-200c-3p | <a href="#">FAM3B</a>   | family with sequence similarity 3 member B                       |
| hsa-miR-200c-3p | <a href="#">CFLAR</a>   | CASP8 and FADD like apoptosis regulator                          |
| hsa-miR-200c-3p | <a href="#">PTBP1</a>   | polypyrimidine tract binding protein 1                           |
| hsa-miR-200c-3p | <a href="#">FAM107B</a> | family with sequence similarity 107 member B                     |
| hsa-miR-200c-3p | <a href="#">LRP4</a>    | LDL receptor related protein 4                                   |
| hsa-miR-200c-3p | <a href="#">F2RL2</a>   | coagulation factor II thrombin receptor like 2                   |
| hsa-miR-200c-3p | <a href="#">MTCP1</a>   | mature T cell proliferation 1                                    |
| hsa-miR-200c-3p | <a href="#">OTUD6B</a>  | OTU domain containing 6B                                         |
| hsa-miR-200c-3p | <a href="#">ZNF566</a>  | zinc finger protein 566                                          |
| hsa-miR-200c-3p | <a href="#">CA5B</a>    | carbonic anhydrase 5B                                            |
| hsa-miR-200c-3p | <a href="#">TRPV3</a>   | transient receptor potential cation channel subfamily V member 3 |
| hsa-miR-200c-3p | <a href="#">DCAF5</a>   | DDB1 and CUL4 associated factor 5                                |
| hsa-miR-200c-3p | <a href="#">BASP1</a>   | brain abundant membrane attached signal protein 1                |
| hsa-miR-200c-3p | <a href="#">GSKIP</a>   | GSK3B interacting protein                                        |
| hsa-miR-200c-3p | <a href="#">TRPC3</a>   | transient receptor potential cation channel subfamily C member 3 |

|                 |                          |                                                       |
|-----------------|--------------------------|-------------------------------------------------------|
| hsa-miR-200c-3p | <a href="#">PRRC2C</a>   | proline rich coiled-coil 2C                           |
| hsa-miR-200c-3p | <a href="#">VPS13A</a>   | vacuolar protein sorting 13 homolog A                 |
| hsa-miR-200c-3p | <a href="#">AP1M1</a>    | adaptor related protein complex 1 subunit mu 1        |
| hsa-miR-200c-3p | <a href="#">CNTD1</a>    | cyclin N-terminal domain containing 1                 |
| hsa-miR-200c-3p | <a href="#">SCOC</a>     | short coiled-coil protein                             |
| hsa-miR-200c-3p | <a href="#">BCLAF3</a>   | BCLAF1 and THRAP3 family member 3                     |
| hsa-miR-200c-3p | <a href="#">TM4SF18</a>  | transmembrane 4 L six family member 18                |
| hsa-miR-200c-3p | <a href="#">SMAD5</a>    | SMAD family member 5                                  |
| hsa-miR-200c-3p | <a href="#">GFI1</a>     | growth factor independent 1 transcriptional repressor |
| hsa-miR-200c-3p | <a href="#">ZNF365</a>   | zinc finger protein 365                               |
| hsa-miR-200c-3p | <a href="#">ATP11A</a>   | ATPase phospholipid transporting 11A                  |
| hsa-miR-200c-3p | <a href="#">NLRP11</a>   | NLR family pyrin domain containing 11                 |
| hsa-miR-200c-3p | <a href="#">CDK12</a>    | cyclin dependent kinase 12                            |
| hsa-miR-200c-3p | <a href="#">WSB1</a>     | WD repeat and SOCS box containing 1                   |
| hsa-miR-200c-3p | <a href="#">PSMF1</a>    | proteasome inhibitor subunit 1                        |
| hsa-miR-200c-3p | <a href="#">CDHR1</a>    | cadherin related family member 1                      |
| hsa-miR-200c-3p | <a href="#">RIF1</a>     | replication timing regulatory factor 1                |
| hsa-miR-200c-3p | <a href="#">HNRNPH2</a>  | heterogeneous nuclear ribonucleoprotein H2            |
| hsa-miR-200c-3p | <a href="#">ZNF366</a>   | zinc finger protein 366                               |
| hsa-miR-200c-3p | <a href="#">NAA50</a>    | N(alpha)-acetyltransferase 50, NatE catalytic subunit |
| hsa-miR-200c-3p | <a href="#">SUB1</a>     | SUB1 homolog, transcriptional regulator               |
| hsa-miR-200c-3p | <a href="#">C22orf39</a> | chromosome 22 open reading frame 39                   |
| hsa-miR-200c-3p | <a href="#">SPIDR</a>    | scaffold protein involved in DNA repair               |
| hsa-miR-200c-3p | <a href="#">NIP7</a>     | NIP7, nucleolar pre-rRNA processing protein           |
| hsa-miR-200c-3p | <a href="#">TGFB3</a>    | transforming growth factor beta receptor 3            |
| hsa-miR-200c-3p | <a href="#">TMEM229B</a> | transmembrane protein 229B                            |
| hsa-miR-200c-3p | <a href="#">UTP25</a>    | UTP25, small subunit processor component              |
| hsa-miR-200c-3p | <a href="#">PI15</a>     | peptidase inhibitor 15                                |
| hsa-miR-200c-3p | <a href="#">IRS2</a>     | insulin receptor substrate 2                          |
| hsa-miR-200c-3p | <a href="#">ANKRD28</a>  | ankyrin repeat domain 28                              |
| hsa-miR-200c-3p | <a href="#">WDR45B</a>   | WD repeat domain 45B                                  |
| hsa-miR-200c-3p | <a href="#">C21orf91</a> | chromosome 21 open reading frame 91                   |
| hsa-miR-200c-3p | <a href="#">FGD1</a>     | FYVE, RhoGEF and PH domain containing 1               |
| hsa-miR-200c-3p | <a href="#">FMR1</a>     | fragile X mental retardation 1                        |
| hsa-miR-200c-3p | <a href="#">NFASC</a>    | neurofascin                                           |
| hsa-miR-200c-3p | <a href="#">RFC3</a>     | replication factor C subunit 3                        |
| hsa-miR-200c-3p | <a href="#">RNASEL</a>   | ribonuclease L                                        |
| hsa-miR-200c-3p | <a href="#">OSR1</a>     | odd-skipped related transcription factor 1            |
| hsa-miR-200c-3p | <a href="#">FRS2</a>     | fibroblast growth factor receptor substrate 2         |
| hsa-miR-200c-3p | <a href="#">C2orf15</a>  | chromosome 2 open reading frame 15                    |
| hsa-miR-200c-3p | <a href="#">NR2C1</a>    | nuclear receptor subfamily 2 group C member 1         |
| hsa-miR-200c-3p | <a href="#">ING5</a>     | inhibitor of growth family member 5                   |
| hsa-miR-200c-3p | <a href="#">PENK</a>     | proenkephalin                                         |
| hsa-miR-200c-3p | <a href="#">SOCS6</a>    | suppressor of cytokine signaling 6                    |
| hsa-miR-200c-3p | <a href="#">SEPHS1</a>   | selenophosphate synthetase 1                          |

|                 |                          |                                                              |
|-----------------|--------------------------|--------------------------------------------------------------|
| hsa-miR-200c-3p | <a href="#">NEO1</a>     | neogenin 1                                                   |
| hsa-miR-200c-3p | <a href="#">TP53INP1</a> | tumor protein p53 inducible nuclear protein 1                |
| hsa-miR-200c-3p | <a href="#">TMEM43</a>   | transmembrane protein 43                                     |
| hsa-miR-200c-3p | <a href="#">RBM8A</a>    | RNA binding motif protein 8A                                 |
| hsa-miR-200c-3p | <a href="#">PLXNA4</a>   | plexin A4                                                    |
| hsa-miR-200c-3p | <a href="#">GRIP1</a>    | glutamate receptor interacting protein 1                     |
| hsa-miR-200c-3p | <a href="#">MTAP</a>     | methylthioadenosine phosphorylase                            |
| hsa-miR-200c-3p | <a href="#">NOC3L</a>    | NOC3 like DNA replication regulator                          |
| hsa-miR-200c-3p | <a href="#">GATA2</a>    | GATA binding protein 2                                       |
| hsa-miR-200c-3p | <a href="#">EGLN3</a>    | egl-9 family hypoxia inducible factor 3                      |
| hsa-miR-200c-3p | <a href="#">RASGEF1B</a> | RasGEF domain family member 1B                               |
| hsa-miR-200c-3p | <a href="#">HBS1L</a>    | HBS1 like translational GTPase                               |
| hsa-miR-200c-3p | <a href="#">RAB30</a>    | RAB30, member RAS oncogene family                            |
| hsa-miR-200c-3p | <a href="#">NR2C2</a>    | nuclear receptor subfamily 2 group C member 2                |
| hsa-miR-200c-3p | <a href="#">SOD2</a>     | superoxide dismutase 2                                       |
| hsa-miR-200c-3p | <a href="#">ZNF330</a>   | zinc finger protein 330                                      |
| hsa-miR-200c-3p | <a href="#">ZNF260</a>   | zinc finger protein 260                                      |
| hsa-miR-200c-3p | <a href="#">MLLT10</a>   | MLLT10, histone lysine methyltransferase DOT1L cofactor      |
| hsa-miR-200c-3p | <a href="#">ITPRID2</a>  | ITPR interacting domain containing 2                         |
| hsa-miR-200c-3p | <a href="#">NPR3</a>     | natriuretic peptide receptor 3                               |
| hsa-miR-200c-3p | <a href="#">CRYZ</a>     | crystallin zeta                                              |
| hsa-miR-200c-3p | <a href="#">ONECUT2</a>  | one cut homeobox 2                                           |
| hsa-miR-200c-3p | <a href="#">YOD1</a>     | YOD1 deubiquitinase                                          |
| hsa-miR-200c-3p | <a href="#">LRRTM3</a>   | leucine rich repeat transmembrane neuronal 3                 |
| hsa-miR-200c-3p | <a href="#">ARPP21</a>   | cAMP regulated phosphoprotein 21                             |
| hsa-miR-200c-3p | <a href="#">CDK1</a>     | cyclin dependent kinase 1                                    |
| hsa-miR-200c-3p | <a href="#">NAA16</a>    | N(alpha)-acetyltransferase 16, NatA auxiliary subunit        |
| hsa-miR-200c-3p | <a href="#">TMEM123</a>  | transmembrane protein 123                                    |
| hsa-miR-200c-3p | <a href="#">DYRK2</a>    | dual specificity tyrosine phosphorylation regulated kinase 2 |
| hsa-miR-200c-3p | <a href="#">ACTC1</a>    | actin, alpha, cardiac muscle 1                               |
| hsa-miR-200c-3p | <a href="#">FAM160B1</a> | family with sequence similarity 160 member B1                |
| hsa-miR-200c-3p | <a href="#">UFSP2</a>    | UFM1 specific peptidase 2                                    |
| hsa-miR-200c-3p | <a href="#">ASPH</a>     | aspartate beta-hydroxylase                                   |
| hsa-miR-200c-3p | <a href="#">FUBP1</a>    | far upstream element binding protein 1                       |
| hsa-miR-200c-3p | <a href="#">HIF1AN</a>   | hypoxia inducible factor 1 subunit alpha inhibitor           |
| hsa-miR-200c-3p | <a href="#">IL24</a>     | interleukin 24                                               |
| hsa-miR-200c-3p | <a href="#">DCX</a>      | doublecortin                                                 |
| hsa-miR-200c-3p | <a href="#">CGGBP1</a>   | CGG triplet repeat binding protein 1                         |
| hsa-miR-200c-3p | <a href="#">ST3GAL5</a>  | ST3 beta-galactoside alpha-2,3-sialyltransferase 5           |
| hsa-miR-200c-3p | <a href="#">CLIP2</a>    | CAP-Gly domain containing linker protein 2                   |
| hsa-miR-200c-3p | <a href="#">CD58</a>     | CD58 molecule                                                |
| hsa-miR-200c-3p | <a href="#">ZNF550</a>   | zinc finger protein 550                                      |
| hsa-miR-200c-3p | <a href="#">CDK2</a>     | cyclin dependent kinase 2                                    |

|                 |                                |                                                        |
|-----------------|--------------------------------|--------------------------------------------------------|
| hsa-miR-200c-3p | <a href="#">TADA2B</a>         | transcriptional adaptor 2B                             |
| hsa-miR-200c-3p | <a href="#">FBXL16</a>         | F-box and leucine rich repeat protein 16               |
| hsa-miR-200c-3p | <a href="#">TPD52L1</a>        | TPD52 like 1                                           |
| hsa-miR-200c-3p | <a href="#">GLS</a>            | glutaminase                                            |
| hsa-miR-200c-3p | <a href="#">SIRT1</a>          | sirtuin 1                                              |
| hsa-miR-200c-3p | <a href="#">SPART</a>          | spartin                                                |
| hsa-miR-200c-3p | <a href="#">ATMIN</a>          | ATM interactor                                         |
| hsa-miR-200c-3p | <a href="#">C2orf72</a>        | chromosome 2 open reading frame 72                     |
| hsa-miR-200c-3p | <a href="#">C2orf68</a>        | chromosome 2 open reading frame 68                     |
| hsa-miR-200c-3p | <a href="#">BUB1B-PAK6</a>     | BUB1B-PAK6 readthrough                                 |
| hsa-miR-200c-3p | <a href="#">CLCF1</a>          | cardiotrophin like cytokine factor 1                   |
| hsa-miR-200c-3p | <a href="#">CSTF3</a>          | cleavage stimulation factor subunit 3                  |
| hsa-miR-200c-3p | <a href="#">ADIPOQ</a>         | adiponectin, C1Q and collagen domain containing        |
| hsa-miR-200c-3p | <a href="#">CLCC1</a>          | chloride channel CLIC like 1                           |
| hsa-miR-200c-3p | <a href="#">BORCS7</a>         | BLOC-1 related complex subunit 7                       |
| hsa-miR-200c-3p | <a href="#">SERF2</a>          | small EDRK-rich factor 2                               |
| hsa-miR-200c-3p | <a href="#">TREM1</a>          | triggering receptor expressed on myeloid cells 1       |
| hsa-miR-200c-3p | <a href="#">ASXL1</a>          | ASXL transcriptional regulator 1                       |
| hsa-miR-200c-3p | <a href="#">TRIM2</a>          | tripartite motif containing 2                          |
| hsa-miR-200c-3p | <a href="#">RPL36A-HNRNPH2</a> | RPL36A-HNRNPH2 readthrough                             |
| hsa-miR-200c-3p | <a href="#">PRPF38A</a>        | pre-mRNA processing factor 38A                         |
| hsa-miR-200c-3p | <a href="#">KLHL14</a>         | kelch like family member 14                            |
| hsa-miR-200c-3p | <a href="#">RALGPS2</a>        | Ral GEF with PH domain and SH3 binding motif 2         |
| hsa-miR-200c-3p | <a href="#">LGSN</a>           | lengsin, lens protein with glutamine synthetase domain |
| hsa-miR-200c-3p | <a href="#">PAN3</a>           | poly(A) specific ribonuclease subunit PAN3             |
| hsa-miR-200c-3p | <a href="#">SGCB</a>           | sarcoglycan beta                                       |
| hsa-miR-200c-3p | <a href="#">MEGF10</a>         | multiple EGF like domains 10                           |
| hsa-miR-200c-3p | <a href="#">SLC16A7</a>        | solute carrier family 16 member 7                      |
| hsa-miR-200c-3p | <a href="#">CCSER1</a>         | coiled-coil serine rich protein 1                      |
| hsa-miR-200c-3p | <a href="#">BBS12</a>          | Bardet-Biedl syndrome 12                               |
| hsa-miR-200c-3p | <a href="#">LRRC34</a>         | leucine rich repeat containing 34                      |
| hsa-miR-200c-3p | <a href="#">USF3</a>           | upstream transcription factor family member 3          |
| hsa-miR-200c-3p | <a href="#">CASC4</a>          | cancer susceptibility 4                                |
| hsa-miR-200c-3p | <a href="#">ITSN1</a>          | intersectin 1                                          |
| hsa-miR-200c-3p | <a href="#">ERBIN</a>          | erbB2 interacting protein                              |
| hsa-miR-200c-3p | <a href="#">XRN2</a>           | 5'-3' exoribonuclease 2                                |
| hsa-miR-200c-3p | <a href="#">CTNNA3</a>         | catenin alpha 3                                        |
| hsa-miR-200c-3p | <a href="#">CREB5</a>          | cAMP responsive element binding protein 5              |
| hsa-miR-200c-3p | <a href="#">PPP1R12B</a>       | protein phosphatase 1 regulatory subunit 12B           |
| hsa-miR-200c-3p | <a href="#">MDM4</a>           | MDM4, p53 regulator                                    |
| hsa-miR-200c-3p | <a href="#">XKRY2</a>          | XK related, Y-linked 2                                 |
| hsa-miR-200c-3p | <a href="#">RBMXL2</a>         | RBMX like 2                                            |
| hsa-miR-200c-3p | <a href="#">TENM1</a>          | teneurin transmembrane protein 1                       |
| hsa-miR-200c-3p | <a href="#">BHLHE41</a>        | basic helix-loop-helix family member e41               |

|                 |                          |                                                                                                                 |
|-----------------|--------------------------|-----------------------------------------------------------------------------------------------------------------|
| hsa-miR-200c-3p | <a href="#">SNTB2</a>    | syntrophin beta 2                                                                                               |
| hsa-miR-200c-3p | <a href="#">ATAT1</a>    | alpha tubulin acetyltransferase 1                                                                               |
| hsa-miR-200c-3p | <a href="#">SSH2</a>     | slingshot protein phosphatase 2                                                                                 |
| hsa-miR-200c-3p | <a href="#">XKRY</a>     | XK related, Y-linked                                                                                            |
| hsa-miR-200c-3p | <a href="#">STAM</a>     | signal transducing adaptor molecule                                                                             |
| hsa-miR-200c-3p | <a href="#">KIF13A</a>   | kinesin family member 13A                                                                                       |
| hsa-miR-200c-3p | <a href="#">PIGM</a>     | phosphatidylinositol glycan anchor biosynthesis class M                                                         |
| hsa-miR-200c-3p | <a href="#">LSM8</a>     | LSM8 homolog, U6 small nuclear RNA associated                                                                   |
| hsa-miR-200c-3p | <a href="#">CFAP97</a>   | cilia and flagella associated protein 97                                                                        |
| hsa-miR-200c-3p | <a href="#">CKLF</a>     | chemokine like factor                                                                                           |
| hsa-miR-200c-3p | <a href="#">RBBP4</a>    | RB binding protein 4, chromatin remodeling factor                                                               |
| hsa-miR-200c-3p | <a href="#">ALPI</a>     | alkaline phosphatase, intestinal                                                                                |
| hsa-miR-200c-3p | <a href="#">TMEM26</a>   | transmembrane protein 26                                                                                        |
| hsa-miR-200c-3p | <a href="#">DARS</a>     | aspartyl-tRNA synthetase                                                                                        |
| hsa-miR-200c-3p | <a href="#">GLIS2</a>    | GLIS family zinc finger 2                                                                                       |
| hsa-miR-200c-3p | <a href="#">COL4A3</a>   | collagen type IV alpha 3 chain                                                                                  |
| hsa-miR-200c-3p | <a href="#">MOSPD2</a>   | motile sperm domain containing 2                                                                                |
| hsa-miR-200c-3p | <a href="#">CA3</a>      | carbonic anhydrase 3                                                                                            |
| hsa-miR-200c-3p | <a href="#">TOR1AIP2</a> | torsin 1A interacting protein 2                                                                                 |
| hsa-miR-200c-3p | <a href="#">TARDBP</a>   | TAR DNA binding protein                                                                                         |
| hsa-miR-200c-3p | <a href="#">LRIG1</a>    | leucine rich repeats and immunoglobulin like domains 1                                                          |
| hsa-miR-200c-3p | <a href="#">FAM217B</a>  | family with sequence similarity 217 member B                                                                    |
| hsa-miR-200c-3p | <a href="#">WWP2</a>     | WW domain containing E3 ubiquitin protein ligase 2                                                              |
| hsa-miR-200c-3p | <a href="#">PM20D2</a>   | peptidase M20 domain containing 2                                                                               |
| hsa-miR-200c-3p | <a href="#">CEBPD</a>    | CCAAT enhancer binding protein delta                                                                            |
| hsa-miR-200c-3p | <a href="#">LRAT</a>     | lecithin retinol acyltransferase                                                                                |
| hsa-miR-200c-3p | <a href="#">NALCN</a>    | sodium leak channel, non-selective                                                                              |
| hsa-miR-200c-3p | <a href="#">NEK9</a>     | NIMA related kinase 9                                                                                           |
| hsa-miR-200c-3p | <a href="#">FLT4</a>     | fms related tyrosine kinase 4                                                                                   |
| hsa-miR-200c-3p | <a href="#">IGSF3</a>    | immunoglobulin superfamily member 3                                                                             |
| hsa-miR-200c-3p | <a href="#">LDB3</a>     | LIM domain binding 3                                                                                            |
| hsa-miR-200c-3p | <a href="#">SNX1</a>     | sorting nexin 1                                                                                                 |
| hsa-miR-200c-3p | <a href="#">KAT2B</a>    | lysine acetyltransferase 2B                                                                                     |
| hsa-miR-200c-3p | <a href="#">SCN9A</a>    | sodium voltage-gated channel alpha subunit 9                                                                    |
| hsa-miR-200c-3p | <a href="#">SMARCAD1</a> | SWI/SNF-related, matrix-associated actin-dependent regulator of chromatin, subfamily a, containing DEAD/H box 1 |
| hsa-miR-200c-3p | <a href="#">GABPB1</a>   | GA binding protein transcription factor subunit beta 1                                                          |
| hsa-miR-200c-3p | <a href="#">NUP153</a>   | nucleoporin 153                                                                                                 |
| hsa-miR-200c-3p | <a href="#">ABRA</a>     | actin binding Rho activating protein                                                                            |
| hsa-miR-200c-3p | <a href="#">ERI1</a>     | exoribonuclease 1                                                                                               |
| hsa-miR-200c-3p | <a href="#">GABRA6</a>   | gamma-aminobutyric acid type A receptor alpha6 subunit                                                          |
| hsa-miR-200c-3p | <a href="#">TUBB3</a>    | tubulin beta 3 class III                                                                                        |
| hsa-miR-200c-3p | <a href="#">CPXCR1</a>   | CPX chromosome region, candidate 1                                                                              |



|                 |                           |                                                                       |
|-----------------|---------------------------|-----------------------------------------------------------------------|
| hsa-miR-200c-3p | <a href="#">EDNRA</a>     | endothelin receptor type A                                            |
| hsa-miR-200c-3p | <a href="#">BDKRB2</a>    | bradykinin receptor B2                                                |
| hsa-miR-200c-3p | <a href="#">SHISA2</a>    | shisa family member 2                                                 |
| hsa-miR-200c-3p | <a href="#">GPR85</a>     | G protein-coupled receptor 85                                         |
| hsa-miR-200c-3p | <a href="#">TNFRSF11B</a> | TNF receptor superfamily member 11b                                   |
| hsa-miR-200c-3p | <a href="#">ZNF674</a>    | zinc finger protein 674                                               |
| hsa-miR-200c-3p | <a href="#">PDPK1</a>     | 3-phosphoinositide dependent protein kinase 1                         |
| hsa-miR-200c-3p | <a href="#">CFHR5</a>     | complement factor H related 5                                         |
| hsa-miR-200c-3p | <a href="#">VTI1A</a>     | vesicle transport through interaction with t-SNAREs 1A                |
| hsa-miR-200c-3p | <a href="#">SLC25A30</a>  | solute carrier family 25 member 30                                    |
| hsa-miR-200c-3p | <a href="#">PARG</a>      | poly(ADP-ribose) glycohydrolase                                       |
| hsa-miR-200c-3p | <a href="#">TMEM38B</a>   | transmembrane protein 38B                                             |
| hsa-miR-200c-3p | <a href="#">TMEM14A</a>   | transmembrane protein 14A                                             |
| hsa-miR-200c-3p | <a href="#">PIK3CB</a>    | phosphatidylinositol-4,5-bisphosphate 3-kinase catalytic subunit beta |
| hsa-miR-200c-3p | <a href="#">TMED4</a>     | transmembrane p24 trafficking protein 4                               |
| hsa-miR-200c-3p | <a href="#">HLF</a>       | HLF, PAR bZIP transcription factor                                    |
| hsa-miR-200c-3p | <a href="#">SLC15A2</a>   | solute carrier family 15 member 2                                     |
| hsa-miR-200c-3p | <a href="#">COL9A2</a>    | collagen type IX alpha 2 chain                                        |
| hsa-miR-200c-3p | <a href="#">CREG1</a>     | cellular repressor of E1A stimulated genes 1                          |
| hsa-miR-200c-3p | <a href="#">TENT5D</a>    | terminal nucleotidyltransferase 5D                                    |
| hsa-miR-200c-3p | <a href="#">AMACR</a>     | alpha-methylacyl-CoA racemase                                         |
| hsa-miR-200c-3p | <a href="#">MMS22L</a>    | MMS22 like, DNA repair protein                                        |
| hsa-miR-200c-3p | <a href="#">RWDD2A</a>    | RWD domain containing 2A                                              |
| hsa-miR-200c-3p | <a href="#">REFX7</a>     | regulatory factor X7                                                  |
| hsa-miR-200c-3p | <a href="#">AMOTL2</a>    | angiomotin like 2                                                     |
| hsa-miR-200c-3p | <a href="#">DDX3Y</a>     | DEAD-box helicase 3 Y-linked                                          |
| hsa-miR-200c-3p | <a href="#">KBTBD6</a>    | kelch repeat and BTB domain containing 6                              |
| hsa-miR-200c-3p | <a href="#">ZNF692</a>    | zinc finger protein 692                                               |
| hsa-miR-200c-3p | <a href="#">ZNF831</a>    | zinc finger protein 831                                               |
| hsa-miR-200c-3p | <a href="#">PIA2</a>      | praja ring finger ubiquitin ligase 2                                  |
| hsa-miR-200c-3p | <a href="#">GPR63</a>     | G protein-coupled receptor 63                                         |
| hsa-miR-200c-3p | <a href="#">PLEKHA8</a>   | pleckstrin homology domain containing A8                              |
| hsa-miR-200c-3p | <a href="#">TRAT1</a>     | T cell receptor associated transmembrane adaptor 1                    |
| hsa-miR-200c-3p | <a href="#">ARL6IP6</a>   | ADP ribosylation factor like GTPase 6 interacting protein 6           |
| hsa-miR-200c-3p | <a href="#">STX16</a>     | syntaxin 16                                                           |
| hsa-miR-200c-3p | <a href="#">RELCH</a>     | RAB11 binding and LisH domain, coiled-coil and HEAT repeat containing |
| hsa-miR-200c-3p | <a href="#">DDX1</a>      | DEAD-box helicase 1                                                   |
| hsa-miR-200c-3p | <a href="#">SELENOK</a>   | selenoprotein K                                                       |
| hsa-miR-200c-3p | <a href="#">SNX30</a>     | sorting nexin family member 30                                        |
| hsa-miR-200c-3p | <a href="#">DNAJC18</a>   | DnaJ heat shock protein family (Hsp40) member C18                     |
| hsa-miR-200c-3p | <a href="#">SHROOM4</a>   | shroom family member 4                                                |
| hsa-miR-200c-3p | <a href="#">CDH6</a>      | cadherin 6                                                            |
| hsa-miR-200c-3p | <a href="#">ZNF568</a>    | zinc finger protein 568                                               |

|                 |                          |                                                             |
|-----------------|--------------------------|-------------------------------------------------------------|
| hsa-miR-200c-3p | <a href="#">ARHGEF3</a>  | Rho guanine nucleotide exchange factor 3                    |
| hsa-miR-200c-3p | <a href="#">NAPB</a>     | NSF attachment protein beta                                 |
| hsa-miR-200c-3p | <a href="#">RET</a>      | ret proto-oncogene                                          |
| hsa-miR-200c-3p | <a href="#">RAD18</a>    | RAD18, E3 ubiquitin protein ligase                          |
| hsa-miR-200c-3p | <a href="#">HLA-DPA1</a> | major histocompatibility complex, class II, DP alpha 1      |
| hsa-miR-200c-3p | <a href="#">ADGRL2</a>   | adhesion G protein-coupled receptor L2                      |
| hsa-miR-200c-3p | <a href="#">SLC17A4</a>  | solute carrier family 17 member 4                           |
| hsa-miR-200c-3p | <a href="#">ELAVL4</a>   | ELAV like RNA binding protein 4                             |
| hsa-miR-200c-3p | <a href="#">ZBTB5</a>    | zinc finger and BTB domain containing 5                     |
| hsa-miR-200c-3p | <a href="#">ENAH</a>     | ENAH, actin regulator                                       |
| hsa-miR-200c-3p | <a href="#">SLC25A24</a> | solute carrier family 25 member 24                          |
| hsa-miR-200c-3p | <a href="#">ZMYM4</a>    | zinc finger MYM-type containing 4                           |
| hsa-miR-200c-3p | <a href="#">HNRNPU</a>   | heterogeneous nuclear ribonucleoprotein U                   |
| hsa-miR-200c-3p | <a href="#">CALHM5</a>   | calcium homeostasis modulator family member 5               |
| hsa-miR-200c-3p | <a href="#">GDPD1</a>    | glycerophosphodiester phosphodiesterase domain containing 1 |
| hsa-miR-200c-3p | <a href="#">RBFA</a>     | ribosome binding factor A                                   |
| hsa-miR-200c-3p | <a href="#">EPM2AIP1</a> | EPM2A interacting protein 1                                 |
| hsa-miR-200c-3p | <a href="#">MPPED1</a>   | metallophosphoesterase domain containing 1                  |
| hsa-miR-200c-3p | <a href="#">RCN1</a>     | reticulocalbin 1                                            |
| hsa-miR-200c-3p | <a href="#">AK9</a>      | adenylate kinase 9                                          |
| hsa-miR-200c-3p | <a href="#">UXS1</a>     | UDP-glucuronate decarboxylase 1                             |
| hsa-miR-200c-3p | <a href="#">LMAN1</a>    | lectin, mannose binding 1                                   |
| hsa-miR-200c-3p | <a href="#">CCSAP</a>    | centriole, cilia and spindle associated protein             |
| hsa-miR-200c-3p | <a href="#">KLF10</a>    | Kruppel like factor 10                                      |
| hsa-miR-200c-3p | <a href="#">COPS2</a>    | COP9 signalosome subunit 2                                  |
| hsa-miR-200c-3p | <a href="#">SLAIN1</a>   | SLAIN motif family member 1                                 |
| hsa-miR-200c-3p | <a href="#">ZDHHC15</a>  | zinc finger DHHC-type containing 15                         |
| hsa-miR-200c-3p | <a href="#">SCHIP1</a>   | schwannomin interacting protein 1                           |
| hsa-miR-200c-3p | <a href="#">MRPS35</a>   | mitochondrial ribosomal protein S35                         |
| hsa-miR-200c-3p | <a href="#">CDC27</a>    | cell division cycle 27                                      |
| hsa-miR-200c-3p | <a href="#">GOSR2</a>    | golgi SNAP receptor complex member 2                        |
| hsa-miR-200c-3p | <a href="#">IPMK</a>     | inositol polyphosphate multikinase                          |
| hsa-miR-200c-3p | <a href="#">STAC</a>     | SH3 and cysteine rich domain                                |
| hsa-miR-200c-3p | <a href="#">KLHL3</a>    | kelch like family member 3                                  |
| hsa-miR-200c-3p | <a href="#">USP47</a>    | ubiquitin specific peptidase 47                             |
| hsa-miR-200c-3p | <a href="#">TP53TG3C</a> | TP53 target 3C                                              |
| hsa-miR-200c-3p | <a href="#">TTC5</a>     | tetratricopeptide repeat domain 5                           |
| hsa-miR-200c-3p | <a href="#">EIF2S1</a>   | eukaryotic translation initiation factor 2 subunit alpha    |
| hsa-miR-200c-3p | <a href="#">NOL12</a>    | nucleolar protein 12                                        |
| hsa-miR-200c-3p | <a href="#">GPC6</a>     | glypican 6                                                  |
| hsa-miR-200c-3p | <a href="#">GPX8</a>     | glutathione peroxidase 8 (putative)                         |
| hsa-miR-200c-3p | <a href="#">EXOSC3</a>   | exosome component 3                                         |
| hsa-miR-200c-3p | <a href="#">GREM2</a>    | gremlin 2, DAN family BMP antagonist                        |
| hsa-miR-200c-3p | <a href="#">NSMCE3</a>   | NSE3 homolog, SMC5-SMC6 complex component                   |

|                 |                          |                                                        |
|-----------------|--------------------------|--------------------------------------------------------|
| hsa-miR-200c-3p | <a href="#">HMOX1</a>    | heme oxygenase 1                                       |
| hsa-miR-200c-3p | <a href="#">APLP2</a>    | amyloid beta precursor like protein 2                  |
| hsa-miR-200c-3p | <a href="#">ATF7IP</a>   | activating transcription factor 7 interacting protein  |
| hsa-miR-200c-3p | <a href="#">CALHM1</a>   | calcium homeostasis modulator 1                        |
| hsa-miR-200c-3p | <a href="#">CLDND1</a>   | claudin domain containing 1                            |
| hsa-miR-200c-3p | <a href="#">TTC33</a>    | tetratricopeptide repeat domain 33                     |
| hsa-miR-200c-3p | <a href="#">AVPR1A</a>   | arginine vasopressin receptor 1A                       |
| hsa-miR-200c-3p | <a href="#">ASB13</a>    | ankyrin repeat and SOCS box containing 13              |
| hsa-miR-200c-3p | <a href="#">SAMD12</a>   | sterile alpha motif domain containing 12               |
| hsa-miR-200c-3p | <a href="#">ADD3</a>     | adducin 3                                              |
| hsa-miR-200c-3p | <a href="#">ENTPD5</a>   | ectonucleoside triphosphate diphosphohydrolase 5       |
| hsa-miR-200c-3p | <a href="#">CCDC144A</a> | coiled-coil domain containing 144A                     |
| hsa-miR-200c-3p | <a href="#">TTC21B</a>   | tetratricopeptide repeat domain 21B                    |
| hsa-miR-200c-3p | <a href="#">DGKE</a>     | diacylglycerol kinase epsilon                          |
| hsa-miR-200c-3p | <a href="#">JADE3</a>    | jade family PHD finger 3                               |
| hsa-miR-200c-3p | <a href="#">PTPN13</a>   | protein tyrosine phosphatase, non-receptor type 13     |
| hsa-miR-200c-3p | <a href="#">NCBP3</a>    | nuclear cap binding subunit 3                          |
| hsa-miR-200c-3p | <a href="#">MYEOV</a>    | myeloma overexpressed                                  |
| hsa-miR-200c-3p | <a href="#">RBM48</a>    | RNA binding motif protein 48                           |
| hsa-miR-200c-3p | <a href="#">UCHL5</a>    | ubiquitin C-terminal hydrolase L5                      |
| hsa-miR-200c-3p | <a href="#">ABI2</a>     | abl interactor 2                                       |
| hsa-miR-200c-3p | <a href="#">DR1</a>      | down-regulator of transcription 1                      |
| hsa-miR-200c-3p | <a href="#">TAF5L</a>    | TATA-box binding protein associated factor 5 like      |
| hsa-miR-200c-3p | <a href="#">NECTIN1</a>  | nectin cell adhesion molecule 1                        |
| hsa-miR-200c-3p | <a href="#">MAP2K5</a>   | mitogen-activated protein kinase kinase 5              |
| hsa-miR-200c-3p | <a href="#">FGF9</a>     | fibroblast growth factor 9                             |
| hsa-miR-200c-3p | <a href="#">DNMT3A</a>   | DNA methyltransferase 3 alpha                          |
| hsa-miR-200c-3p | <a href="#">ZDBF2</a>    | zinc finger DBF-type containing 2                      |
| hsa-miR-200c-3p | <a href="#">CNDP2</a>    | carnosine dipeptidase 2                                |
| hsa-miR-200c-3p | <a href="#">RALB</a>     | RAS like proto-oncogene B                              |
| hsa-miR-200c-3p | <a href="#">RUFY2</a>    | RUN and FYVE domain containing 2                       |
| hsa-miR-200c-3p | <a href="#">REL</a>      | REL proto-oncogene, NF-kB subunit                      |
| hsa-miR-200c-3p | <a href="#">RHOA</a>     | ras homolog family member A                            |
| hsa-miR-200c-3p | <a href="#">RBM46</a>    | RNA binding motif protein 46                           |
| hsa-miR-200c-3p | <a href="#">SH3TC2</a>   | SH3 domain and tetratricopeptide repeats 2             |
| hsa-miR-200c-3p | <a href="#">MPP5</a>     | membrane palmitoylated protein 5                       |
| hsa-miR-200c-3p | <a href="#">CCDC62</a>   | coiled-coil domain containing 62                       |
| hsa-miR-200c-3p | <a href="#">SLC5A3</a>   | solute carrier family 5 member 3                       |
| hsa-miR-200c-3p | <a href="#">PRKAA2</a>   | protein kinase AMP-activated catalytic subunit alpha 2 |
| hsa-miR-200c-3p | <a href="#">HPF1</a>     | histone PARylation factor 1                            |
| hsa-miR-200c-3p | <a href="#">TC2N</a>     | tandem C2 domains, nuclear                             |
| hsa-miR-200c-3p | <a href="#">SMPX</a>     | small muscle protein X-linked                          |
| hsa-miR-200c-3p | <a href="#">NRK</a>      | Nik related kinase                                     |
| hsa-miR-200c-3p | <a href="#">SLC16A1</a>  | solute carrier family 16 member 1                      |
| hsa-miR-200c-3p | <a href="#">MGA</a>      | MGA, MAX dimerization prote                            |

|                |                          |                                                      |
|----------------|--------------------------|------------------------------------------------------|
| hsa-miR-210-3p | <a href="#">IGF2</a>     | insulin like growth factor 2                         |
| hsa-miR-210-3p | <a href="#">ISCU</a>     | iron-sulfur cluster assembly enzyme                  |
| hsa-miR-210-3p | <a href="#">GALR2</a>    | galanin receptor 2                                   |
| hsa-miR-210-3p | <a href="#">KMT2D</a>    | lysine methyltransferase 2D                          |
| hsa-miR-210-3p | <a href="#">AIFM3</a>    | apoptosis inducing factor, mitochondria associated 3 |
| hsa-miR-210-3p | <a href="#">FGFRL1</a>   | fibroblast growth factor receptor like 1             |
| hsa-miR-210-3p | <a href="#">NDUFA4</a>   | NDUFA4, mitochondrial complex associated             |
| hsa-miR-210-3p | <a href="#">MID1IP1</a>  | MID1 interacting protein 1                           |
| hsa-miR-210-3p | <a href="#">BDNF</a>     | brain derived neurotrophic factor                    |
| hsa-miR-210-3p | <a href="#">RUNX3</a>    | runt related transcription factor 3                  |
| hsa-miR-210-3p | <a href="#">SHISAL2B</a> | shisa like 2B                                        |
| hsa-miR-210-3p | <a href="#">DENND6A</a>  | DENN domain containing 6A                            |
| hsa-miR-210-3p | <a href="#">GIT2</a>     | GIT ArfGAP 2                                         |
| hsa-miR-210-3p | <a href="#">TTC13</a>    | tetratricopeptide repeat domain 13                   |
| hsa-miR-210-3p | <a href="#">SDF2</a>     | stromal cell derived factor 2                        |
| hsa-miR-210-3p | <a href="#">ACVR1B</a>   | activin A receptor type 1B                           |
| hsa-miR-210-3p | <a href="#">PCYT1B</a>   | phosphate cytidylyltransferase 1, choline, beta      |
| hsa-miR-210-3p | <a href="#">THSD7A</a>   | thrombospondin type 1 domain containing 7A           |
| hsa-miR-210-3p | <a href="#">B4GALT5</a>  | beta-1,4-galactosyltransferase 5                     |
| hsa-miR-210-3p | <a href="#">ARMC1</a>    | armadillo repeat containing 1                        |
| hsa-miR-210-3p | <a href="#">BARD1</a>    | BRCA1 associated RING domain 1                       |
| hsa-miR-210-3p | <a href="#">FAM222A</a>  | family with sequence similarity 222 member A         |
| hsa-miR-210-3p | <a href="#">SIN3A</a>    | SIN3 transcription regulator family member A         |
| hsa-miR-210-3p | <a href="#">VAMP7</a>    | vesicle associated membrane protein 7                |
| hsa-miR-210-3p | <a href="#">DLX1</a>     | distal-less homeobox 1                               |
| hsa-miR-210-3p | <a href="#">GPD1L</a>    | glycerol-3-phosphate dehydrogenase 1 like            |
| hsa-miR-210-3p | <a href="#">RRP1B</a>    | ribosomal RNA processing 1B                          |
| hsa-miR-210-3p | <a href="#">ZNF37A</a>   | zinc finger protein 37A                              |
| hsa-miR-210-3p | <a href="#">CYP4A22</a>  | cytochrome P450 family 4 subfamily A member 22       |
| hsa-miR-210-3p | <a href="#">DIMP1</a>    | DIMP1 dimethyladenosine transferase 1 homolog        |
| hsa-miR-210-3p | <a href="#">ST6GAL2</a>  | ST6 beta-galactoside alpha-2,6-sialyltransferase 2   |
| hsa-miR-210-3p | <a href="#">DCAF5</a>    | DDB1 and CUL4 associated factor 5                    |
| hsa-miR-210-3p | <a href="#">SLC16A14</a> | solute carrier family 16 member 14                   |
| hsa-miR-210-3p | <a href="#">ATP11A</a>   | ATPase phospholipid transporting 11A                 |
| hsa-miR-210-3p | <a href="#">ALDH5A1</a>  | aldehyde dehydrogenase 5 family member A1            |
| hsa-miR-210-3p | <a href="#">SH3BGR1</a>  | SH3 domain binding glutamate rich protein like       |
| hsa-miR-210-3p | <a href="#">SLC24A2</a>  | solute carrier family 24 member 2                    |
| hsa-miR-210-3p | <a href="#">NPTX1</a>    | neuronal pentraxin 1                                 |
| hsa-miR-210-3p | <a href="#">DELE1</a>    | DAP3 binding cell death enhancer 1                   |
| hsa-miR-210-3p | <a href="#">NCOR1</a>    | nuclear receptor corepressor 1                       |
| hsa-miR-210-3p | <a href="#">CORO2B</a>   | coronin 2B                                           |
| hsa-miR-210-3p | <a href="#">ST3GAL3</a>  | ST3 beta-galactoside alpha-2,3-sialyltransferase 3   |
| hsa-miR-210-3p | <a href="#">CAMTA1</a>   | calmodulin binding transcription activator 1         |
| hsa-miR-210-3p | <a href="#">DHX58</a>    | DExH-box helicase 58                                 |
| hsa-miR-210-3p | <a href="#">SCARA3</a>   | scavenger receptor class A member 3                  |

|                |                          |                                                                                |
|----------------|--------------------------|--------------------------------------------------------------------------------|
| hsa-miR-210-3p | <a href="#">TM4SF18</a>  | transmembrane 4 L six family member 18                                         |
| hsa-miR-210-3p | <a href="#">WLS</a>      | Wnt ligand secretion mediator                                                  |
| hsa-miR-210-3p | <a href="#">SLC25A26</a> | solute carrier family 25 member 26                                             |
| hsa-miR-210-3p | <a href="#">KPNA1</a>    | karyopherin subunit alpha 1                                                    |
| hsa-miR-210-3p | <a href="#">NR1D2</a>    | nuclear receptor subfamily 1 group D member 2                                  |
| hsa-miR-210-3p | <a href="#">PANX3</a>    | pannexin 3                                                                     |
| hsa-miR-210-3p | <a href="#">FKBP1B</a>   | FKBP prolyl isomerase 1B                                                       |
| hsa-miR-210-3p | <a href="#">ELFN2</a>    | extracellular leucine rich repeat and fibronectin type III domain containing 2 |
| hsa-miR-210-3p | <a href="#">MGRN1</a>    | mahogunin ring finger 1                                                        |
| hsa-miR-210-3p | <a href="#">KIAA1143</a> | KIAA1143                                                                       |
| hsa-miR-210-3p | <a href="#">PPM1K</a>    | protein phosphatase, Mg <sup>2+</sup> /Mn <sup>2+</sup> dependent 1K           |
| hsa-miR-210-3p | <a href="#">KCMF1</a>    | potassium channel modulatory factor 1                                          |
| hsa-miR-210-3p | <a href="#">DSG1</a>     | desmoglein 1                                                                   |
| hsa-miR-210-3p | <a href="#">E2F3</a>     | E2F transcription factor 3                                                     |
| hsa-miR-210-3p | <a href="#">TNPO3</a>    | transportin 3                                                                  |
| hsa-miR-210-3p | <a href="#">INHBB</a>    | inhibin subunit beta B                                                         |
| hsa-miR-210-3p | <a href="#">NMNAT2</a>   | nicotinamide nucleotide adenylyltransferase 2                                  |
| hsa-miR-210-3p | <a href="#">MIGA2</a>    | mitoguardin 2                                                                  |
| hsa-miR-210-3p | <a href="#">CCDC32</a>   | coiled-coil domain containing 32                                               |
| hsa-miR-210-3p | <a href="#">ATP2B3</a>   | ATPase plasma membrane Ca <sup>2+</sup> transporting 3                         |
| hsa-miR-210-3p | <a href="#">MLC1</a>     | megalencephalic leukoencephalopathy with subcortical cysts 1                   |
| hsa-miR-210-3p | <a href="#">GGNBP2</a>   | gametogenetin binding protein 2                                                |
| hsa-miR-210-3p | <a href="#">CNTNAP5</a>  | contactin associated protein like 5                                            |
| hsa-miR-210-3p | <a href="#">SSX1</a>     | SSX family member 1                                                            |
| hsa-miR-210-3p | <a href="#">USH2A</a>    | usherin                                                                        |
| hsa-miR-210-3p | <a href="#">HOXA9</a>    | homeobox A9                                                                    |
| hsa-miR-210-3p | <a href="#">MYORG</a>    | myogenesis regulating glycosidase (putative)                                   |
| hsa-miR-210-3p | <a href="#">SAMD12</a>   | sterile alpha motif domain containing 12                                       |
| hsa-miR-210-3p | <a href="#">ESCO2</a>    | establishment of sister chromatid cohesion N-acetyltransferase 2               |
| hsa-miR-210-3p | <a href="#">KLF12</a>    | Kruppel like factor 12                                                         |
| hsa-miR-210-3p | <a href="#">RAB7A</a>    | RAB7A, member RAS oncogene family                                              |
| hsa-miR-210-3p | <a href="#">MZF1</a>     | myeloid zinc finger 1                                                          |
| hsa-miR-210-3p | <a href="#">C5orf38</a>  | chromosome 5 open reading frame 38                                             |
| hsa-miR-210-3p | <a href="#">PIK3R5</a>   | phosphoinositide-3-kinase regulatory subunit 5                                 |
| hsa-miR-210-3p | <a href="#">CD22</a>     | CD22 molecule                                                                  |
| hsa-miR-210-3p | <a href="#">SDHD</a>     | succinate dehydrogenase complex subunit D                                      |
| hsa-miR-210-3p | <a href="#">MPEG1</a>    | macrophage expressed 1                                                         |
| hsa-miR-210-3p | <a href="#">ADGRA1</a>   | adhesion G protein-coupled recepto                                             |
| hsa-miR-221-3p | <a href="#">RIMS3</a>    | regulating synaptic membrane exocytosis 3                                      |
| hsa-miR-221-3p | <a href="#">GABRA1</a>   | gamma-aminobutyric acid type A receptor alpha1 subunit                         |
| hsa-miR-221-3p | <a href="#">CDKN1B</a>   | cyclin dependent kinase inhibitor 1B                                           |
| hsa-miR-221-3p | <a href="#">PAIP1</a>    | poly(A) binding protein interacting protein 1                                  |

|                |                              |                                                                              |
|----------------|------------------------------|------------------------------------------------------------------------------|
| hsa-miR-221-3p | <a href="#">PANK3</a>        | pantothenate kinase 3                                                        |
| hsa-miR-221-3p | <a href="#">TCF12</a>        | transcription factor 12                                                      |
| hsa-miR-221-3p | <a href="#">HECTD2</a>       | HECT domain E3 ubiquitin protein ligase 2                                    |
| hsa-miR-221-3p | <a href="#">REFX7</a>        | regulatory factor X7                                                         |
| hsa-miR-221-3p | <a href="#">RGS6</a>         | regulator of G protein signaling 6                                           |
| hsa-miR-221-3p | <a href="#">HMBOX1</a>       | homeobox containing 1                                                        |
| hsa-miR-221-3p | <a href="#">EIF5A2</a>       | eukaryotic translation initiation factor 5A2                                 |
| hsa-miR-221-3p | <a href="#">KIT</a>          | KIT proto-oncogene receptor tyrosine kinase                                  |
| hsa-miR-221-3p | <a href="#">MIDN</a>         | midnolin                                                                     |
| hsa-miR-221-3p | <a href="#">EML6</a>         | EMAP like 6                                                                  |
| hsa-miR-221-3p | <a href="#">CLVS2</a>        | clavesin 2                                                                   |
| hsa-miR-221-3p | <a href="#">GNAI3</a>        | G protein subunit alpha i3                                                   |
| hsa-miR-221-3p | <a href="#">GRB10</a>        | growth factor receptor bound protein 10                                      |
| hsa-miR-221-3p | <a href="#">ARHGEF38</a>     | Rho guanine nucleotide exchange factor 38                                    |
| hsa-miR-221-3p | <a href="#">GRIK1</a>        | glutamate ionotropic receptor kainate type subunit 1                         |
| hsa-miR-221-3p | <a href="#">TGS1</a>         | trimethylguanosine synthase 1                                                |
| hsa-miR-221-3p | <a href="#">RAB18</a>        | RAB18, member RAS oncogene family                                            |
| hsa-miR-221-3p | <a href="#">ADAM22</a>       | ADAM metallopeptidase domain 22                                              |
| hsa-miR-221-3p | <a href="#">DENND1B</a>      | DENN domain containing 1B                                                    |
| hsa-miR-221-3p | <a href="#">FNIP2</a>        | folliculin interacting protein 2                                             |
| hsa-miR-221-3p | <a href="#">MYLIP</a>        | myosin regulatory light chain interacting protein                            |
| hsa-miR-221-3p | <a href="#">VAPB</a>         | VAMP associated protein B and C                                              |
| hsa-miR-221-3p | <a href="#">FNDCA3</a>       | fibronectin type III domain containing 3A                                    |
| hsa-miR-221-3p | <a href="#">LOC100506388</a> | uncharacterized LOC100506388                                                 |
| hsa-miR-221-3p | <a href="#">ZNF91</a>        | zinc finger protein 91                                                       |
| hsa-miR-221-3p | <a href="#">WDR35</a>        | WD repeat domain 35                                                          |
| hsa-miR-221-3p | <a href="#">C3orf70</a>      | chromosome 3 open reading frame 70                                           |
| hsa-miR-221-3p | <a href="#">MIER3</a>        | MIER family member 3                                                         |
| hsa-miR-221-3p | <a href="#">GALNT3</a>       | polypeptide N-acetylgalactosaminyltransferase 3                              |
| hsa-miR-221-3p | <a href="#">NRK</a>          | Nik related kinase                                                           |
| hsa-miR-221-3p | <a href="#">TFG</a>          | TRK-fused gene                                                               |
| hsa-miR-221-3p | <a href="#">PCMTD1</a>       | protein-L-isoaspartate (D-aspartate) O-methyltransferase domain containing 1 |
| hsa-miR-221-3p | <a href="#">POGZ</a>         | pogo transposable element derived with ZNF domain                            |
| hsa-miR-221-3p | <a href="#">RSBN1L</a>       | round spermatid basic protein 1 like                                         |
| hsa-miR-221-3p | <a href="#">DCUN1D1</a>      | defective in cullin neddylation 1 domain containing 1                        |
| hsa-miR-221-3p | <a href="#">CHSY1</a>        | chondroitin sulfate synthase 1                                               |
| hsa-miR-221-3p | <a href="#">AGTPBP1</a>      | ATP/GTP binding protein 1                                                    |
| hsa-miR-221-3p | <a href="#">SEC62</a>        | SEC62 homolog, preprotein translocation factor                               |
| hsa-miR-221-3p | <a href="#">RIT2</a>         | Ras like without CAAX 2                                                      |
| hsa-miR-221-3p | <a href="#">ERBB4</a>        | erb-b2 receptor tyrosine kinase 4                                            |
| hsa-miR-221-3p | <a href="#">DMRT3</a>        | doublesex and mab-3 related transcription factor 3                           |
| hsa-miR-221-3p | <a href="#">PPP3R1</a>       | protein phosphatase 3 regulatory subunit B, alpha                            |
| hsa-miR-221-3p | <a href="#">CCN1</a>         | cellular communication network factor 1                                      |
| hsa-miR-221-3p | <a href="#">NAA25</a>        | N(alpha)-acetyltransferase 25, NatB auxiliary subunit                        |



|                |                          |                                                     |
|----------------|--------------------------|-----------------------------------------------------|
| hsa-miR-221-3p | <a href="#">ARF4</a>     | ADP ribosylation factor 4                           |
| hsa-miR-221-3p | <a href="#">CDH2</a>     | cadherin 2                                          |
| hsa-miR-221-3p | <a href="#">ZFPM2</a>    | zinc finger protein, FOG family member 2            |
| hsa-miR-221-3p | <a href="#">HNRNPH3</a>  | heterogeneous nuclear ribonucleoprotein H3          |
| hsa-miR-221-3p | <a href="#">KIF16B</a>   | kinesin family member 16B                           |
| hsa-miR-221-3p | <a href="#">KIF20A</a>   | kinesin family member 20A                           |
| hsa-miR-221-3p | <a href="#">FMR1</a>     | fragile X mental retardation 1                      |
| hsa-miR-221-3p | <a href="#">ATXN1</a>    | ataxin 1                                            |
| hsa-miR-221-3p | <a href="#">FOXN2</a>    | forkhead box N2                                     |
| hsa-miR-221-3p | <a href="#">MRAP2</a>    | melanocortin 2 receptor accessory protein 2         |
| hsa-miR-221-3p | <a href="#">CBWD5</a>    | COBW domain containing 5                            |
| hsa-miR-221-3p | <a href="#">CASZ1</a>    | castor zinc finger 1                                |
| hsa-miR-221-3p | <a href="#">CBWD1</a>    | COBW domain containing 1                            |
| hsa-miR-221-3p | <a href="#">SUN2</a>     | Sad1 and UNC84 domain containing 2                  |
| hsa-miR-221-3p | <a href="#">CBWD6</a>    | COBW domain containing 6                            |
| hsa-miR-221-3p | <a href="#">DCAF12</a>   | DDB1 and CUL4 associated factor 12                  |
| hsa-miR-221-3p | <a href="#">VASH1</a>    | vasohibin 1                                         |
| hsa-miR-221-3p | <a href="#">TMCC1</a>    | transmembrane and coiled-coil domain family 1       |
| hsa-miR-221-3p | <a href="#">TP53BP2</a>  | tumor protein p53 binding protein 2                 |
| hsa-miR-221-3p | <a href="#">CBWD3</a>    | COBW domain containing 3                            |
| hsa-miR-221-3p | <a href="#">ETV3</a>     | ETS variant 3                                       |
| hsa-miR-221-3p | <a href="#">MARK1</a>    | microtubule affinity regulating kinase 1            |
| hsa-miR-221-3p | <a href="#">PHACTR4</a>  | phosphatase and actin regulator 4                   |
| hsa-miR-221-3p | <a href="#">SYT10</a>    | synaptotagmin 10                                    |
| hsa-miR-221-3p | <a href="#">PIK3R1</a>   | phosphoinositide-3-kinase regulatory subunit 1      |
| hsa-miR-221-3p | <a href="#">CBWD2</a>    | COBW domain containing 2                            |
| hsa-miR-221-3p | <a href="#">APOLD1</a>   | apolipoprotein L domain containing 1                |
| hsa-miR-221-3p | <a href="#">LHFPL2</a>   | LHFPL tetraspan subfamily member 2                  |
| hsa-miR-221-3p | <a href="#">FERMT2</a>   | fermitin family member 2                            |
| hsa-miR-221-3p | <a href="#">KLF7</a>     | Kruppel like factor 7                               |
| hsa-miR-221-3p | <a href="#">CXCL12</a>   | C-X-C motif chemokine ligand 12                     |
| hsa-miR-221-3p | <a href="#">CCDC18</a>   | coiled-coil domain containing 18                    |
| hsa-miR-221-3p | <a href="#">NXPH1</a>    | neurexophilin 1                                     |
| hsa-miR-221-3p | <a href="#">BICDL1</a>   | BICD family like cargo adaptor 1                    |
| hsa-miR-221-3p | <a href="#">BCL2L11</a>  | BCL2 like 11                                        |
| hsa-miR-221-3p | <a href="#">BRWD1</a>    | bromodomain and WD repeat domain containing 1       |
| hsa-miR-221-3p | <a href="#">C6</a>       | complement C6                                       |
| hsa-miR-221-3p | <a href="#">RFX8</a>     | RFX family member 8, lacking RFX DNA binding domain |
| hsa-miR-221-3p | <a href="#">C6orf118</a> | chromosome 6 open reading frame 118                 |
| hsa-miR-221-3p | <a href="#">PPP2R2A</a>  | protein phosphatase 2 regulatory subunit Balpha     |
| hsa-miR-221-3p | <a href="#">MARF1</a>    | meiosis regulator and mRNA stability factor 1       |
| hsa-miR-221-3p | <a href="#">FAM214A</a>  | family with sequence similarity 214 member A        |
| hsa-miR-221-3p | <a href="#">PIEZO2</a>   | piezo type mechanosensitive ion channel component 2 |
| hsa-miR-221-3p | <a href="#">DPH6</a>     | diphthamine biosynthesis 6                          |
| hsa-miR-221-3p | <a href="#">PLCL2</a>    | phospholipase C like 2                              |

|                |                          |                                                                  |
|----------------|--------------------------|------------------------------------------------------------------|
| hsa-miR-221-3p | <a href="#">ZNF615</a>   | zinc finger protein 615                                          |
| hsa-miR-221-3p | <a href="#">GABRG1</a>   | gamma-aminobutyric acid type A receptor gamma1 subunit           |
| hsa-miR-221-3p | <a href="#">CDK19</a>    | cyclin dependent kinase 19                                       |
| hsa-miR-221-3p | <a href="#">HIPK1</a>    | homeodomain interacting protein kinase 1                         |
| hsa-miR-221-3p | <a href="#">GUCY1A2</a>  | guanylate cyclase 1 soluble subunit alpha 2                      |
| hsa-miR-221-3p | <a href="#">WDR47</a>    | WD repeat domain 47                                              |
| hsa-miR-221-3p | <a href="#">SESN3</a>    | sestrin 3                                                        |
| hsa-miR-221-3p | <a href="#">USP27X</a>   | ubiquitin specific peptidase 27 X-linked                         |
| hsa-miR-221-3p | <a href="#">AP3B2</a>    | adaptor related protein complex 3 subunit beta 2                 |
| hsa-miR-221-3p | <a href="#">ESR1</a>     | estrogen receptor 1                                              |
| hsa-miR-221-3p | <a href="#">TUB</a>      | tubby bipartite transcription factor                             |
| hsa-miR-221-3p | <a href="#">ASPA</a>     | aspartoacylase                                                   |
| hsa-miR-221-3p | <a href="#">SYBU</a>     | syntabulin                                                       |
| hsa-miR-221-3p | <a href="#">CTDSPL2</a>  | CTD small phosphatase like 2                                     |
| hsa-miR-221-3p | <a href="#">SBK1</a>     | SH3 domain binding kinase 1                                      |
| hsa-miR-221-3p | <a href="#">DDIT4</a>    | DNA damage inducible transcript 4                                |
| hsa-miR-221-3p | <a href="#">CLRN1</a>    | clarin 1                                                         |
| hsa-miR-221-3p | <a href="#">SLC4A7</a>   | solute carrier family 4 member 7                                 |
| hsa-miR-221-3p | <a href="#">TLE3</a>     | TLE family member 3, transcriptional corepressor                 |
| hsa-miR-221-3p | <a href="#">RFX3</a>     | regulatory factor X3                                             |
| hsa-miR-221-3p | <a href="#">EIF3I</a>    | eukaryotic translation initiation factor 3 subunit J             |
| hsa-miR-221-3p | <a href="#">ANKRD12</a>  | ankyrin repeat domain 12                                         |
| hsa-miR-221-3p | <a href="#">CREBL2</a>   | cAMP responsive element binding protein like 2                   |
| hsa-miR-221-3p | <a href="#">TSPAN13</a>  | tetraspanin 13                                                   |
| hsa-miR-221-3p | <a href="#">ZMYM2</a>    | zinc finger MYM-type containing 2                                |
| hsa-miR-221-3p | <a href="#">DPP8</a>     | dipeptidyl peptidase 8                                           |
| hsa-miR-221-3p | <a href="#">AQP3</a>     | aquaporin 3 (Gill blood group)                                   |
| hsa-miR-221-3p | <a href="#">SHLD2</a>    | shieldin complex subunit 2                                       |
| hsa-miR-221-3p | <a href="#">MIA3</a>     | MIA SH3 domain ER export factor 3                                |
| hsa-miR-221-3p | <a href="#">IRX5</a>     | iroquois homeobox 5                                              |
| hsa-miR-221-3p | <a href="#">CLGN</a>     | calmegin                                                         |
| hsa-miR-221-3p | <a href="#">PGPEP1L</a>  | pyroglutamyl-peptidase I like                                    |
| hsa-miR-221-3p | <a href="#">KIAA1841</a> | KIAA1841                                                         |
| hsa-miR-221-3p | <a href="#">BEND4</a>    | BEN domain containing 4                                          |
| hsa-miR-221-3p | <a href="#">LYPLA1</a>   | lysophospholipase 1                                              |
| hsa-miR-221-3p | <a href="#">SEMA3C</a>   | semaphorin 3C                                                    |
| hsa-miR-221-3p | <a href="#">PAF1</a>     | PAF1 homolog, Paf1/RNA polymerase II complex component           |
| hsa-miR-221-3p | <a href="#">TRPC3</a>    | transient receptor potential cation channel subfamily C member 3 |
| hsa-miR-221-3p | <a href="#">RNPS1</a>    | RNA binding protein with serine rich domain 1                    |
| hsa-miR-221-3p | <a href="#">NIPAL4</a>   | NIPA like domain containing 4                                    |
| hsa-miR-221-3p | <a href="#">UBE2I1</a>   | ubiquitin conjugating enzyme E2 J1                               |
| hsa-miR-221-3p | <a href="#">ZNF385A</a>  | zinc finger protein 385A                                         |
| hsa-miR-221-3p | <a href="#">TSC22D3</a>  | TSC22 domain family member 3                                     |

|                |                         |                                                                                                   |
|----------------|-------------------------|---------------------------------------------------------------------------------------------------|
| hsa-miR-221-3p | <a href="#">ZNF181</a>  | zinc finger protein 181                                                                           |
| hsa-miR-221-3p | <a href="#">BEAN1</a>   | brain expressed associated with NEDD4 1                                                           |
| hsa-miR-221-3p | <a href="#">KDR</a>     | kinase insert domain receptor                                                                     |
| hsa-miR-221-3p | <a href="#">GPBP1</a>   | GC-rich promoter binding protein 1                                                                |
| hsa-miR-221-3p | <a href="#">SNX4</a>    | sorting nexin 4                                                                                   |
| hsa-miR-221-3p | <a href="#">L3MBTL1</a> | L3MBTL1, histone methyl-lysine binding protein                                                    |
| hsa-miR-221-3p | <a href="#">AIDA</a>    | axin interactor, dorsalization associated                                                         |
| hsa-miR-221-3p | <a href="#">GDF9</a>    | growth differentiation factor 9                                                                   |
| hsa-miR-221-3p | <a href="#">FGF14</a>   | fibroblast growth factor 14                                                                       |
| hsa-miR-221-3p | <a href="#">NYAP2</a>   | neuronal tyrosine-phosphorylated phosphoinositide-3-kinase adaptor 2                              |
| hsa-miR-221-3p | <a href="#">MYBL1</a>   | MYB proto-oncogene like 1                                                                         |
| hsa-miR-221-3p | <a href="#">BRWD3</a>   | bromodomain and WD repeat domain containing 3                                                     |
| hsa-miR-221-3p | <a href="#">POLR3E</a>  | RNA polymerase III subunit E                                                                      |
| hsa-miR-221-3p | <a href="#">IRF2</a>    | interferon regulatory factor 2                                                                    |
| hsa-miR-221-3p | <a href="#">ATP1B1</a>  | ATPase Na <sup>+</sup> /K <sup>+</sup> transporting subunit beta 1                                |
| hsa-miR-221-3p | <a href="#">TUBA1A</a>  | tubulin alpha 1a                                                                                  |
| hsa-miR-221-3p | <a href="#">SNRNP48</a> | small nuclear ribonucleoprotein U11/U12 subunit 48                                                |
| hsa-miR-221-3p | <a href="#">RNF4</a>    | ring finger protein 4                                                                             |
| hsa-miR-221-3p | <a href="#">DNAJC6</a>  | DnaJ heat shock protein family (Hsp40) member C6                                                  |
| hsa-miR-221-3p | <a href="#">FXN</a>     | frataxin                                                                                          |
| hsa-miR-221-3p | <a href="#">NAP1L5</a>  | nucleosome assembly protein 1 like 5                                                              |
| hsa-miR-221-3p | <a href="#">BBC3</a>    | BCL2 binding component 3                                                                          |
| hsa-miR-221-3p | <a href="#">WNK3</a>    | WNK lysine deficient protein kinase 3                                                             |
| hsa-miR-221-3p | <a href="#">SLC2A13</a> | solute carrier family 2 member 13                                                                 |
| hsa-miR-221-3p | <a href="#">PLXNC1</a>  | plexin C1                                                                                         |
| hsa-miR-221-3p | <a href="#">LBR</a>     | lamin B receptor                                                                                  |
| hsa-miR-221-3p | <a href="#">RDX</a>     | radixin                                                                                           |
| hsa-miR-221-3p | <a href="#">SYNCRIP</a> | synaptotagmin binding cytoplasmic RNA interacting protein                                         |
| hsa-miR-221-3p | <a href="#">TDRP</a>    | testis development related protein                                                                |
| hsa-miR-221-3p | <a href="#">SNAP29</a>  | synaptosome associated protein 29                                                                 |
| hsa-miR-221-3p | <a href="#">ATAD2B</a>  | ATPase family, AAA domain containing 2B                                                           |
| hsa-miR-221-3p | <a href="#">AKAP5</a>   | A-kinase anchoring protein 5                                                                      |
| hsa-miR-221-3p | <a href="#">RBP2</a>    | retinol binding protein 2                                                                         |
| hsa-miR-221-3p | <a href="#">INA</a>     | internexin neuronal intermediate filament protein alpha                                           |
| hsa-miR-221-3p | <a href="#">LUZP2</a>   | leucine zipper protein 2                                                                          |
| hsa-miR-221-3p | <a href="#">SMARCA5</a> | SWI/SNF related, matrix associated, actin dependent regulator of chromatin, subfamily a, member 5 |
| hsa-miR-221-3p | <a href="#">SVIP</a>    | small VCP interacting protein                                                                     |
| hsa-miR-221-3p | <a href="#">ZFYVE16</a> | zinc finger FYVE-type containing 16                                                               |
| hsa-miR-221-3p | <a href="#">PMEPA1</a>  | prostate transmembrane protein, androgen induced 1                                                |
| hsa-miR-221-3p | <a href="#">ZFP36L2</a> | ZFP36 ring finger protein like 2                                                                  |
| hsa-miR-221-3p | <a href="#">ZNF624</a>  | zinc finger protein 624                                                                           |
| hsa-miR-221-3p | <a href="#">SEC24C</a>  | SEC24 homolog C, COPII coat complex component                                                     |
| hsa-miR-221-3p | <a href="#">RALA</a>    | RAS like proto-oncogene A                                                                         |

|                |                         |                                                                                                      |
|----------------|-------------------------|------------------------------------------------------------------------------------------------------|
| hsa-miR-221-3p | <a href="#">SLC6A4</a>  | solute carrier family 6 member 4                                                                     |
| hsa-miR-221-3p | <a href="#">RAB1A</a>   | RAB1A, member RAS oncogene family                                                                    |
| hsa-miR-221-3p | <a href="#">TNRC6C</a>  | trinucleotide repeat containing 6C                                                                   |
| hsa-miR-221-3p | <a href="#">HSPA8</a>   | heat shock protein family A (Hsp70) member 8                                                         |
| hsa-miR-221-3p | <a href="#">CASR</a>    | calcium sensing receptor                                                                             |
| hsa-miR-221-3p | <a href="#">PRRC2B</a>  | proline rich coiled-coil 2B                                                                          |
| hsa-miR-221-3p | <a href="#">NFIYB</a>   | nuclear transcription factor Y subunit beta                                                          |
| hsa-miR-221-3p | <a href="#">NTF3</a>    | neurotrophin 3                                                                                       |
| hsa-miR-221-3p | <a href="#">CMTM4</a>   | CKLF like MARVEL transmembrane domain containing 4                                                   |
| hsa-miR-221-3p | <a href="#">PARP9</a>   | poly(ADP-ribose) polymerase family member 9                                                          |
| hsa-miR-221-3p | <a href="#">NANOS1</a>  | nanos C2HC-type zinc finger 1                                                                        |
| hsa-miR-221-3p | <a href="#">ANGPTL2</a> | angiopoietin like 2                                                                                  |
| hsa-miR-221-3p | <a href="#">AMMECR1</a> | Alport syndrome, mental retardation, midface hypoplasia and elliptocytosis chromosomal region gene 1 |
| hsa-miR-221-3p | <a href="#">OSTM1</a>   | osteoclastogenesis associated transmembrane protein 1                                                |
| hsa-miR-221-3p | <a href="#">SOX10</a>   | SRY-box 10                                                                                           |
| hsa-miR-221-3p | <a href="#">DIRAS3</a>  | DIRAS family GTPase 3                                                                                |
| hsa-miR-221-3p | <a href="#">ADAM17</a>  | ADAM metallopeptidase domain 17                                                                      |
| hsa-miR-221-3p | <a href="#">LRFN2</a>   | leucine rich repeat and fibronectin type III domain containing 2                                     |
| hsa-miR-221-3p | <a href="#">ZNF275</a>  | zinc finger protein 275                                                                              |
| hsa-miR-221-3p | <a href="#">NFATC3</a>  | nuclear factor of activated T cells 3                                                                |
| hsa-miR-221-3p | <a href="#">PTPN4</a>   | protein tyrosine phosphatase, non-receptor type 4                                                    |
| hsa-miR-221-3p | <a href="#">ANKRD52</a> | ankyrin repeat domain 52                                                                             |
| hsa-miR-221-3p | <a href="#">NFATC2</a>  | nuclear factor of activated T cells 2                                                                |
| hsa-miR-221-3p | <a href="#">MAP4K5</a>  | mitogen-activated protein kinase kinase kinase kinase 5                                              |
| hsa-miR-221-3p | <a href="#">KMT2A</a>   | lysine methyltransferase 2A                                                                          |
| hsa-miR-221-3p | <a href="#">PLCXD3</a>  | phosphatidylinositol specific phospholipase C X domain containing 3                                  |
| hsa-miR-221-3p | <a href="#">ZFAND5</a>  | zinc finger AN1-type containing 5                                                                    |
| hsa-miR-221-3p | <a href="#">KCNH8</a>   | potassium voltage-gated channel subfamily H member 8                                                 |
| hsa-miR-221-3p | <a href="#">NDST3</a>   | N-deacetylase and N-sulfotransferase 3                                                               |
| hsa-miR-221-3p | <a href="#">SLC30A6</a> | solute carrier family 30 member 6                                                                    |
| hsa-miR-221-3p | <a href="#">NCKAP5</a>  | NCK associated protein 5                                                                             |
| hsa-miR-221-3p | <a href="#">ANXA3</a>   | annexin A3                                                                                           |
| hsa-miR-221-3p | <a href="#">EOGT</a>    | EGF domain specific O-linked N-acetylglucosamine transferase                                         |
| hsa-miR-221-3p | <a href="#">ZBTB5</a>   | zinc finger and BTB domain containing 5                                                              |
| hsa-miR-221-3p | <a href="#">BMF</a>     | Bcl2 modifying factor                                                                                |
| hsa-miR-221-3p | <a href="#">CUX2</a>    | cut like homeobox 2                                                                                  |
| hsa-miR-221-3p | <a href="#">PRDM1</a>   | PR/SET domain 1                                                                                      |
| hsa-miR-221-3p | <a href="#">FRY</a>     | FRY microtubule binding protein                                                                      |
| hsa-miR-221-3p | <a href="#">CLDN11</a>  | claudin 11                                                                                           |
| hsa-miR-221-3p | <a href="#">PLPPR1</a>  | phospholipid phosphatase related 1                                                                   |
| hsa-miR-221-3p | <a href="#">PPDPFL</a>  | pancreatic progenitor cell differentiation and proliferation factor like                             |

|                |                          |                                                                      |
|----------------|--------------------------|----------------------------------------------------------------------|
| hsa-miR-221-3p | <a href="#">CNR1</a>     | cannabinoid receptor 1                                               |
| hsa-miR-221-3p | <a href="#">TRAF3IP2</a> | TRAF3 interacting protein 2                                          |
| hsa-miR-221-3p | <a href="#">ITGB3</a>    | integrin subunit beta 3                                              |
| hsa-miR-221-3p | <a href="#">ZNF629</a>   | zinc finger protein 629                                              |
| hsa-miR-221-3p | <a href="#">ZFP30</a>    | ZFP30 zinc finger protein                                            |
| hsa-miR-221-3p | <a href="#">SNCB</a>     | synuclein beta                                                       |
| hsa-miR-221-3p | <a href="#">CPEB3</a>    | cytoplasmic polyadenylation element binding protein 3                |
| hsa-miR-221-3p | <a href="#">GALNT18</a>  | polypeptide N-acetylgalactosaminyltransferase 18                     |
| hsa-miR-221-3p | <a href="#">PRICKLE2</a> | prickle planar cell polarity protein 2                               |
| hsa-miR-221-3p | <a href="#">MEGF9</a>    | multiple EGF like domains 9                                          |
| hsa-miR-221-3p | <a href="#">PAIP2</a>    | poly(A) binding protein interacting protein 2                        |
| hsa-miR-221-3p | <a href="#">PCDHA1</a>   | protocadherin alpha 1                                                |
| hsa-miR-221-3p | <a href="#">CBFB</a>     | core-binding factor subunit beta                                     |
| hsa-miR-221-3p | <a href="#">C11orf87</a> | chromosome 11 open reading frame 87                                  |
| hsa-miR-221-3p | <a href="#">PCDHA4</a>   | protocadherin alpha 4                                                |
| hsa-miR-221-3p | <a href="#">PCDHA7</a>   | protocadherin alpha 7                                                |
| hsa-miR-221-3p | <a href="#">PCDHA3</a>   | protocadherin alpha 3                                                |
| hsa-miR-221-3p | <a href="#">PCDHA12</a>  | protocadherin alpha 12                                               |
| hsa-miR-221-3p | <a href="#">GBX2</a>     | gastrulation brain homeobox 2                                        |
| hsa-miR-221-3p | <a href="#">ZNF704</a>   | zinc finger protein 704                                              |
| hsa-miR-221-3p | <a href="#">C6orf120</a> | chromosome 6 open reading frame 120                                  |
| hsa-miR-221-3p | <a href="#">PCDHA11</a>  | protocadherin alpha 11                                               |
| hsa-miR-221-3p | <a href="#">PCDHA2</a>   | protocadherin alpha 2                                                |
| hsa-miR-221-3p | <a href="#">DCUN1D4</a>  | defective in cullin neddylation 1 domain containing 4                |
| hsa-miR-221-3p | <a href="#">FBXO47</a>   | F-box protein 47                                                     |
| hsa-miR-221-3p | <a href="#">XIRP2</a>    | xin actin binding repeat containing 2                                |
| hsa-miR-221-3p | <a href="#">PCDHA6</a>   | protocadherin alpha 6                                                |
| hsa-miR-221-3p | <a href="#">MAGI1</a>    | membrane associated guanylate kinase, WW and PDZ domain containing 1 |
| hsa-miR-221-3p | <a href="#">PCDHA5</a>   | protocadherin alpha 5                                                |
| hsa-miR-221-3p | <a href="#">ZKSCAN8</a>  | zinc finger with KRAB and SCAN domains 8                             |
| hsa-miR-221-3p | <a href="#">PCDHA10</a>  | protocadherin alpha 10                                               |
| hsa-miR-221-3p | <a href="#">PCDHAC1</a>  | protocadherin alpha subfamily C, 1                                   |
| hsa-miR-221-3p | <a href="#">PCDHA8</a>   | protocadherin alpha 8                                                |
| hsa-miR-221-3p | <a href="#">PCDHA13</a>  | protocadherin alpha 13                                               |
| hsa-miR-221-3p | <a href="#">PCDHAC2</a>  | protocadherin alpha subfamily C, 2                                   |
| hsa-miR-221-3p | <a href="#">CPNE8</a>    | copine 8                                                             |
| hsa-miR-221-3p | <a href="#">PPARGC1A</a> | PPARG coactivator 1 alpha                                            |
| hsa-miR-221-3p | <a href="#">TMEM132C</a> | transmembrane protein 132C                                           |
| hsa-miR-221-3p | <a href="#">ABHD3</a>    | abhydrolase domain containing 3                                      |
| hsa-miR-221-3p | <a href="#">MPZL1</a>    | myelin protein zero like 1                                           |
| hsa-miR-221-3p | <a href="#">VGLL4</a>    | vestigial like family member 4                                       |
| hsa-miR-221-3p | <a href="#">SRD5A3</a>   | steroid 5 alpha-reductase 3                                          |
| hsa-miR-221-3p | <a href="#">RORB</a>     | RAR related orphan receptor B                                        |
| hsa-miR-221-3p | <a href="#">SCD5</a>     | stearoyl-CoA desaturase 5                                            |

|                |                          |                                                                              |
|----------------|--------------------------|------------------------------------------------------------------------------|
| hsa-miR-221-3p | <a href="#">RALGAPA1</a> | Ral GTPase activating protein catalytic alpha subunit 1                      |
| hsa-miR-221-3p | <a href="#">MRPS7</a>    | mitochondrial ribosomal protein S7                                           |
| hsa-miR-221-3p | <a href="#">FANCD2</a>   | FA complementation group D2                                                  |
| hsa-miR-221-3p | <a href="#">CLDND1</a>   | claudin domain containing 1                                                  |
| hsa-miR-221-3p | <a href="#">SYCE2</a>    | synaptonemal complex central element protein 2                               |
| hsa-miR-221-3p | <a href="#">YWHAG</a>    | tyrosine 3-monooxygenase/tryptophan 5-monooxygenase activation protein gamma |
| hsa-miR-221-3p | <a href="#">TGOLN2</a>   | trans-golgi network protein 2                                                |
| hsa-miR-221-3p | <a href="#">KLC1</a>     | kinesin light chain 1                                                        |
| hsa-miR-221-3p | <a href="#">ABCA8</a>    | ATP binding cassette subfamily A member 8                                    |
| hsa-miR-221-3p | <a href="#">ZNF93</a>    | zinc finger protein 93                                                       |
| hsa-miR-221-3p | <a href="#">SGIP1</a>    | SH3 domain GRB2 like endophilin interacting protein 1                        |
| hsa-miR-221-3p | <a href="#">PDIK1L</a>   | PDLIM1 interacting kinase 1 like                                             |
| hsa-miR-221-3p | <a href="#">ARAP2</a>    | ArfGAP with RhoGAP domain, ankyrin repeat and PH domain 2                    |
| hsa-miR-221-3p | <a href="#">WSB2</a>     | WD repeat and SOCS box containing 2                                          |
| hsa-miR-221-3p | <a href="#">SPART</a>    | spartin                                                                      |
| hsa-miR-221-3p | <a href="#">PTBP3</a>    | polypyrimidine tract binding protein 3                                       |
| hsa-miR-221-3p | <a href="#">NIPBL</a>    | NIPBL, cohesin loading factor                                                |
| hsa-miR-221-3p | <a href="#">NOVA1</a>    | NOVA alternative splicing regulator 1                                        |
| hsa-miR-221-3p | <a href="#">ZNF74</a>    | zinc finger protein 74                                                       |
| hsa-miR-221-3p | <a href="#">GAB1</a>     | GRB2 associated binding protein 1                                            |
| hsa-miR-221-3p | <a href="#">GTF2E1</a>   | general transcription factor IIE subunit 1                                   |
| hsa-miR-221-3p | <a href="#">CAMTA1</a>   | calmodulin binding transcription activator 1                                 |
| hsa-miR-221-3p | <a href="#">ONECUT2</a>  | one cut homeobox 2                                                           |
| hsa-miR-221-3p | <a href="#">PLSCR4</a>   | phospholipid scramblase 4                                                    |
| hsa-miR-221-3p | <a href="#">SERPINB2</a> | serpin family B member 2                                                     |
| hsa-miR-221-3p | <a href="#">EVI2A</a>    | ecotropic viral integration site 2A                                          |
| hsa-miR-221-3p | <a href="#">PDS5A</a>    | PDS5 cohesin associated factor A                                             |
| hsa-miR-221-3p | <a href="#">TLNRD1</a>   | talin rod domain containing 1                                                |
| hsa-miR-221-3p | <a href="#">DYNC1LI2</a> | dynein cytoplasmic 1 light intermediate chain 2                              |
| hsa-miR-221-3p | <a href="#">MAN2A1</a>   | mannosidase alpha class 2A member 1                                          |
| hsa-miR-221-3p | <a href="#">AGPS</a>     | alkylglycerone phosphate synthase                                            |
| hsa-miR-221-3p | <a href="#">TBXT</a>     | T-box transcription factor T                                                 |
| hsa-miR-221-3p | <a href="#">DBT</a>      | dihydrolipoamide branched chain transacylase E2                              |
| hsa-miR-221-3p | <a href="#">ENAH</a>     | ENAH, actin regulator                                                        |
| hsa-miR-221-3p | <a href="#">LRRCC1</a>   | leucine rich repeat and coiled-coil centrosomal protein 1                    |
| hsa-miR-221-3p | <a href="#">CREBZF</a>   | CREB/ATF bZIP transcription factor                                           |
| hsa-miR-221-3p | <a href="#">CDKN2AIP</a> | CDKN2A interacting protein                                                   |
| hsa-miR-221-3p | <a href="#">CYLD</a>     | CYLD lysine 63 deubiquitinase                                                |
| hsa-miR-221-3p | <a href="#">RBM24</a>    | RNA binding motif protein 24                                                 |
| hsa-miR-221-3p | <a href="#">KIAA0586</a> | KIAA0586                                                                     |
| hsa-miR-221-3p | <a href="#">ARHGEF7</a>  | Rho guanine nucleotide exchange factor 7                                     |
| hsa-miR-221-3p | <a href="#">ITPR2</a>    | inositol 1,4,5-trisphosphate receptor type 2                                 |
| hsa-miR-221-3p | <a href="#">KPNA2</a>    | karyopherin subunit alpha 2                                                  |



|                |                          |                                                             |
|----------------|--------------------------|-------------------------------------------------------------|
| hsa-miR-221-3p | <a href="#">ZNF25</a>    | zinc finger protein 25                                      |
| hsa-miR-221-3p | <a href="#">PDLIM2</a>   | PDZ and LIM domain 2                                        |
| hsa-miR-221-3p | <a href="#">TOX</a>      | thymocyte selection associated high mobility group box      |
| hsa-miR-221-3p | <a href="#">PRKAB2</a>   | protein kinase AMP-activated non-catalytic subunit beta 2   |
| hsa-miR-221-3p | <a href="#">NSMCE4A</a>  | NSE4 homolog A, SMC5-SMC6 complex component                 |
| hsa-miR-221-3p | <a href="#">SEC24B</a>   | SEC24 homolog B, COPII coat complex component               |
| hsa-miR-221-3p | <a href="#">TRPS1</a>    | transcriptional repressor GATA binding 1                    |
| hsa-miR-221-3p | <a href="#">CLIC2</a>    | chloride intracellular channel 2                            |
| hsa-miR-221-3p | <a href="#">NAP1L1</a>   | nucleosome assembly protein 1 like 1                        |
| hsa-miR-221-3p | <a href="#">LRRTM2</a>   | leucine rich repeat transmembrane neuronal 2                |
| hsa-miR-221-3p | <a href="#">IL17RB</a>   | interleukin 17 receptor B                                   |
| hsa-miR-221-3p | <a href="#">SEMA6D</a>   | semaphorin 6D                                               |
| hsa-miR-221-3p | <a href="#">HNRNPA0</a>  | heterogeneous nuclear ribonucleoprotein A0                  |
| hsa-miR-221-3p | <a href="#">GJC3</a>     | gap junction protein gamma 3                                |
| hsa-miR-221-3p | <a href="#">CYREN</a>    | cell cycle regulator of NHEJ                                |
| hsa-miR-221-3p | <a href="#">SOCS3</a>    | suppressor of cytokine signaling 3                          |
| hsa-miR-221-3p | <a href="#">CYP4X1</a>   | cytochrome P450 family 4 subfamily X member 1               |
| hsa-miR-221-3p | <a href="#">KPNA1</a>    | karyopherin subunit alpha 1                                 |
| hsa-miR-221-3p | <a href="#">ANKRD10</a>  | ankyrin repeat domain 10                                    |
| hsa-miR-221-3p | <a href="#">NLK</a>      | nemo like kinase                                            |
| hsa-miR-221-3p | <a href="#">MEX3A</a>    | mex-3 RNA binding family member A                           |
| hsa-miR-221-3p | <a href="#">HLTF</a>     | helicase like transcription factor                          |
| hsa-miR-221-3p | <a href="#">IFIT2</a>    | interferon induced protein with tetratricopeptide repeats 2 |
| hsa-miR-221-3p | <a href="#">ANKS1B</a>   | ankyrin repeat and sterile alpha motif domain containing 1B |
| hsa-miR-221-3p | <a href="#">UGT2B15</a>  | UDP glucuronosyltransferase family 2 member B15             |
| hsa-miR-221-3p | <a href="#">CHD7</a>     | chromodomain helicase DNA binding protein 7                 |
| hsa-miR-221-3p | <a href="#">IGF2BP2</a>  | insulin like growth factor 2 mRNA binding protein 2         |
| hsa-miR-221-3p | <a href="#">YTHDF3</a>   | YTH N6-methyladenosine RNA binding protein 3                |
| hsa-miR-221-3p | <a href="#">NGRN</a>     | neugrin, neurite outgrowth associated                       |
| hsa-miR-221-3p | <a href="#">COBL1</a>    | cordon-bleu WH2 repeat protein like 1                       |
| hsa-miR-221-3p | <a href="#">CEP41</a>    | centrosomal protein 41                                      |
| hsa-miR-221-3p | <a href="#">ASB4</a>     | ankyrin repeat and SOCS box containing 4                    |
| hsa-miR-221-3p | <a href="#">PDCD10</a>   | programmed cell death 10                                    |
| hsa-miR-221-3p | <a href="#">MASTL</a>    | microtubule associated serine/threonine kinase like         |
| hsa-miR-221-3p | <a href="#">RUNX2</a>    | runt related transcription factor 2                         |
| hsa-miR-221-3p | <a href="#">TRABD2B</a>  | TraB domain containing 2B                                   |
| hsa-miR-221-3p | <a href="#">PTPRZ1</a>   | protein tyrosine phosphatase, receptor type Z1              |
| hsa-miR-221-3p | <a href="#">FAT2</a>     | FAT atypical cadherin 2                                     |
| hsa-miR-221-3p | <a href="#">FAM160B1</a> | family with sequence similarity 160 member B1               |
| hsa-miR-221-3p | <a href="#">KANK4</a>    | KN motif and ankyrin repeat domains 4                       |
| hsa-miR-221-3p | <a href="#">ZNF652</a>   | zinc finger protein 652                                     |
| hsa-miR-221-3p | <a href="#">CD164</a>    | CD164 molecule                                              |
| hsa-miR-221-3p | <a href="#">NRG1</a>     | neuregulin 1                                                |

|                |                          |                                                                    |
|----------------|--------------------------|--------------------------------------------------------------------|
| hsa-miR-221-3p | <a href="#">GNB1</a>     | G protein subunit beta 1                                           |
| hsa-miR-221-3p | <a href="#">CEP70</a>    | centrosomal protein 70                                             |
| hsa-miR-221-3p | <a href="#">CCSAP</a>    | centriole, cilia and spindle associated protein                    |
| hsa-miR-221-3p | <a href="#">KHDRBS2</a>  | KH RNA binding domain containing, signal transduction associated 2 |
| hsa-miR-221-3p | <a href="#">ERCC4</a>    | ERCC excision repair 4, endonuclease catalytic subunit             |
| hsa-miR-221-3p | <a href="#">ACVR2B</a>   | activin A receptor type 2B                                         |
| hsa-miR-221-3p | <a href="#">RASSF8</a>   | Ras association domain family member 8                             |
| hsa-miR-221-3p | <a href="#">RNF20</a>    | ring finger protein 20                                             |
| hsa-miR-221-3p | <a href="#">ALDH16A1</a> | aldehyde dehydrogenase 16 family member A1                         |
| hsa-miR-221-3p | <a href="#">SPTBN1</a>   | spectrin beta, non-erythrocytic 1                                  |
| hsa-miR-221-3p | <a href="#">ANTXR2</a>   | ANTXR cell adhesion molecule 2                                     |
| hsa-miR-221-3p | <a href="#">ANKHD1</a>   | ankyrin repeat and KH domain containing 1                          |
| hsa-miR-221-3p | <a href="#">SLC4A4</a>   | solute carrier family 4 member 4                                   |
| hsa-miR-221-3p | <a href="#">ZNF3</a>     | zinc finger protein 3                                              |
| hsa-miR-221-3p | <a href="#">CALM1</a>    | calmodulin 1                                                       |
| hsa-miR-221-3p | <a href="#">BCL2L14</a>  | BCL2 like 14                                                       |
| hsa-miR-221-3p | <a href="#">TYMSOS</a>   | TYMS opposite strand                                               |
| hsa-miR-221-3p | <a href="#">CARE</a>     | calcium responsive transcription factor                            |
| hsa-miR-221-3p | <a href="#">USP6NL</a>   | USP6 N-terminal like                                               |
| hsa-miR-221-3p | <a href="#">ZC3H13</a>   | zinc finger CCCH-type containing 13                                |
| hsa-miR-221-3p | <a href="#">DLD</a>      | dihydrolipoamide dehydrogenase                                     |
| hsa-miR-221-3p | <a href="#">FBXO28</a>   | F-box protein 28                                                   |
| hsa-miR-221-3p | <a href="#">MON2</a>     | MON2 homolog, regulator of endosome-to-Golgi trafficking           |
| hsa-miR-221-3p | <a href="#">STN1</a>     | STN1, CST complex subunit                                          |
| hsa-miR-221-3p | <a href="#">ETS1</a>     | ETS proto-oncogene 1, transcription factor                         |
| hsa-miR-221-3p | <a href="#">CACNB4</a>   | calcium voltage-gated channel auxiliary subunit beta 4             |
| hsa-miR-221-3p | <a href="#">PDCD6IP</a>  | programmed cell death 6 interacting protein                        |
| hsa-miR-221-3p | <a href="#">GOLGA1</a>   | golgin A1                                                          |
| hsa-miR-221-3p | <a href="#">ZFH3</a>     | zinc finger homeobox 3                                             |
| hsa-miR-221-3p | <a href="#">TMEM132B</a> | transmembrane protein 132B                                         |
| hsa-miR-221-3p | <a href="#">C22orf39</a> | chromosome 22 open reading frame 39                                |
| hsa-miR-221-3p | <a href="#">CCT5</a>     | chaperonin containing TCP1 subunit 5                               |
| hsa-miR-221-3p | <a href="#">KSR1</a>     | kinase suppressor of ras 1                                         |
| hsa-miR-221-3p | <a href="#">NUFIP2</a>   | nuclear FMR1 interacting protein 2                                 |
| hsa-miR-221-3p | <a href="#">AGFG1</a>    | ArfGAP with FG repeats 1                                           |
| hsa-miR-221-3p | <a href="#">TCF7L2</a>   | transcription factor 7 like 2                                      |
| hsa-miR-221-3p | <a href="#">PPP4R2</a>   | protein phosphatase 4 regulatory subunit 2                         |
| hsa-miR-221-3p | <a href="#">STK24</a>    | serine/threonine kinase 24                                         |
| hsa-miR-221-3p | <a href="#">CDON</a>     | cell adhesion associated, oncogene regulated                       |
| hsa-miR-221-3p | <a href="#">FAM222B</a>  | family with sequence similarity 222 member B                       |
| hsa-miR-221-3p | <a href="#">DGKH</a>     | diacylglycerol kinase eta                                          |
| hsa-miR-221-3p | <a href="#">HDLBP</a>    | high density lipoprotein binding protein                           |
| hsa-miR-221-3p | <a href="#">SHANK2</a>   | SH3 and multiple ankyrin repeat domains 2                          |

|                |                          |                                                                          |
|----------------|--------------------------|--------------------------------------------------------------------------|
| hsa-miR-221-3p | <a href="#">CFAP161</a>  | cilia and flagella associated protein 161                                |
| hsa-miR-221-3p | <a href="#">CRHBP</a>    | corticotropin releasing hormone binding protein                          |
| hsa-miR-221-3p | <a href="#">CDV3</a>     | CDV3 homolog                                                             |
| hsa-miR-221-3p | <a href="#">URI1</a>     | URI1, prefoldin like chaperone                                           |
| hsa-miR-221-3p | <a href="#">CD47</a>     | CD47 molecule                                                            |
| hsa-miR-221-3p | <a href="#">SPPL3</a>    | signal peptide peptidase like 3                                          |
| hsa-miR-221-3p | <a href="#">CD4</a>      | CD4 molecule                                                             |
| hsa-miR-221-3p | <a href="#">LRRC19</a>   | leucine rich repeat containing 19                                        |
| hsa-miR-221-3p | <a href="#">EMX2</a>     | empty spiracles homeobox 2                                               |
| hsa-miR-221-3p | <a href="#">PRDM11</a>   | PR/SET domain 11                                                         |
| hsa-miR-221-3p | <a href="#">PTPRR</a>    | protein tyrosine phosphatase, receptor type R                            |
| hsa-miR-221-3p | <a href="#">IGDCC4</a>   | immunoglobulin superfamily DCC subclass member 4                         |
| hsa-miR-221-3p | <a href="#">CDKN2B</a>   | cyclin dependent kinase inhibitor 2B                                     |
| hsa-miR-221-3p | <a href="#">TMEM25</a>   | transmembrane protein 25                                                 |
| hsa-miR-221-3p | <a href="#">CAMK1D</a>   | calcium/calmodulin dependent protein kinase ID                           |
| hsa-miR-221-3p | <a href="#">MGAT4A</a>   | alpha-1,3-mannosyl-glycoprotein 4-beta-N-acetylglucosaminyltransferase A |
| hsa-miR-221-3p | <a href="#">ZFP90</a>    | ZFP90 zinc finger protein                                                |
| hsa-miR-221-3p | <a href="#">ERMN</a>     | ermin                                                                    |
| hsa-miR-221-3p | <a href="#">RPS3</a>     | ribosomal protein S3                                                     |
| hsa-miR-221-3p | <a href="#">CCP110</a>   | centriolar coiled-coil protein 110                                       |
| hsa-miR-221-3p | <a href="#">NBPF3</a>    | NBPF member 3                                                            |
| hsa-miR-221-3p | <a href="#">CRKL</a>     | CRK like proto-oncogene, adaptor protein                                 |
| hsa-miR-221-3p | <a href="#">REV3L</a>    | REV3 like, DNA directed polymerase zeta catalytic subunit                |
| hsa-miR-221-3p | <a href="#">STYX</a>     | serine/threonine/tyrosine interacting protein                            |
| hsa-miR-221-3p | <a href="#">ZNF83</a>    | zinc finger protein 83                                                   |
| hsa-miR-221-3p | <a href="#">ST8SIA1</a>  | ST8 alpha-N-acetyl-neuraminide alpha-2,8-sialyltransferase 1             |
| hsa-miR-221-3p | <a href="#">SOD2</a>     | superoxide dismutase 2                                                   |
| hsa-miR-221-3p | <a href="#">sept-14</a>  | septin 14                                                                |
| hsa-miR-221-3p | <a href="#">GPD2</a>     | glycerol-3-phosphate dehydrogenase 2                                     |
| hsa-miR-221-3p | <a href="#">HIPK2</a>    | homeodomain interacting protein kinase 2                                 |
| hsa-miR-221-3p | <a href="#">HOXC10</a>   | homeobox C10                                                             |
| hsa-miR-221-3p | <a href="#">STOX2</a>    | storkhead box 2                                                          |
| hsa-miR-221-3p | <a href="#">PSAP</a>     | prosaposin                                                               |
| hsa-miR-221-3p | <a href="#">DIRAS2</a>   | DIRAS family GTPase 2                                                    |
| hsa-miR-221-3p | <a href="#">C2CD4A</a>   | C2 calcium dependent domain containing 4A                                |
| hsa-miR-221-3p | <a href="#">SLC26A3</a>  | solute carrier family 26 member 3                                        |
| hsa-miR-221-3p | <a href="#">DLG2</a>     | discs large MAGUK scaffold protein 2                                     |
| hsa-miR-221-3p | <a href="#">PRDM2</a>    | PR/SET domain 2                                                          |
| hsa-miR-221-3p | <a href="#">C18orf54</a> | chromosome 18 open reading frame 54                                      |
| hsa-miR-221-3p | <a href="#">CRX</a>      | cone-rod homeobox                                                        |
| hsa-miR-221-3p | <a href="#">CAVIN3</a>   | caveolae associated protein 3                                            |
| hsa-miR-221-3p | <a href="#">STK38L</a>   | serine/threonine kinase 38 like                                          |
| hsa-miR-221-3p | <a href="#">CCDC126</a>  | coiled-coil domain containing 126                                        |

|                |                          |                                                            |
|----------------|--------------------------|------------------------------------------------------------|
| hsa-miR-221-3p | <a href="#">GLMN</a>     | glomulin, FKBP associated protein                          |
| hsa-miR-221-3p | <a href="#">LGI2</a>     | leucine rich repeat LGI family member 2                    |
| hsa-miR-221-3p | <a href="#">KBTBD11</a>  | kelch repeat and BTB domain containing 11                  |
| hsa-miR-221-3p | <a href="#">PLEKHA2</a>  | pleckstrin homology domain containing A2                   |
| hsa-miR-221-3p | <a href="#">SLITRK5</a>  | SLIT and NTRK like family member 5                         |
| hsa-miR-221-3p | <a href="#">THBS1</a>    | thrombospondin 1                                           |
| hsa-miR-221-3p | <a href="#">PCDHA9</a>   | protocadherin alpha 9                                      |
| hsa-miR-221-3p | <a href="#">GLS</a>      | glutaminase                                                |
| hsa-miR-221-3p | <a href="#">CCDC148</a>  | coiled-coil domain containing 148                          |
| hsa-miR-221-3p | <a href="#">SLC10A7</a>  | solute carrier family 10 member 7                          |
| hsa-miR-221-3p | <a href="#">MSL2</a>     | MSL complex subunit 2                                      |
| hsa-miR-221-3p | <a href="#">MBD2</a>     | methyl-CpG binding domain protein 2                        |
| hsa-miR-221-3p | <a href="#">PLPP3</a>    | phospholipid phosphatase 3                                 |
| hsa-miR-221-3p | <a href="#">TMEM237</a>  | transmembrane protein 237                                  |
| hsa-miR-221-3p | <a href="#">PROM2</a>    | prominin 2                                                 |
| hsa-miR-221-3p | <a href="#">UBE2V1</a>   | ubiquitin conjugating enzyme E2 V1                         |
| hsa-miR-221-3p | <a href="#">MAPK10</a>   | mitogen-activated protein kinase 10                        |
| hsa-miR-221-3p | <a href="#">ADIPOR1</a>  | adiponectin receptor 1                                     |
| hsa-miR-221-3p | <a href="#">TMEM167A</a> | transmembrane protein 167A                                 |
| hsa-miR-221-3p | <a href="#">KCNQ3</a>    | potassium voltage-gated channel subfamily Q member 3       |
| hsa-miR-221-3p | <a href="#">LDHAL6B</a>  | lactate dehydrogenase A like 6B                            |
| hsa-miR-221-3p | <a href="#">ANKIB1</a>   | ankyrin repeat and IBR domain containing 1                 |
| hsa-miR-221-3p | <a href="#">ECPAS</a>    | Ecm29 proteasome adaptor and scaffold                      |
| hsa-miR-221-3p | <a href="#">MRE11</a>    | MRE11 homolog, double strand break repair nuclease         |
| hsa-miR-221-3p | <a href="#">DCAF7</a>    | DDB1 and CUL4 associated factor 7                          |
| hsa-miR-221-3p | <a href="#">ZNF547</a>   | zinc finger protein 547                                    |
| hsa-miR-221-3p | <a href="#">GRM1</a>     | glutamate metabotropic receptor 1                          |
| hsa-miR-221-3p | <a href="#">GPM6A</a>    | glycoprotein M6A                                           |
| hsa-miR-221-3p | <a href="#">BRD1</a>     | bromodomain containing 1                                   |
| hsa-miR-221-3p | <a href="#">FBN2</a>     | fibrillin 2                                                |
| hsa-miR-221-3p | <a href="#">SLC25A37</a> | solute carrier family 25 member 37                         |
| hsa-miR-221-3p | <a href="#">TMSB15B</a>  | thymosin beta 15B                                          |
| hsa-miR-221-3p | <a href="#">CSTF2T</a>   | cleavage stimulation factor subunit 2 tau variant          |
| hsa-miR-221-3p | <a href="#">RECK</a>     | reversion inducing cysteine rich protein with kazal motifs |
| hsa-miR-221-3p | <a href="#">TBC1D22B</a> | TBC1 domain family member 22B                              |
| hsa-miR-221-3p | <a href="#">SH3PXD2B</a> | SH3 and PX domains 2B                                      |
| hsa-miR-221-3p | <a href="#">MYO10</a>    | myosin X                                                   |
| hsa-miR-221-3p | <a href="#">ACADM</a>    | acyl-CoA dehydrogenase medium chain                        |
| hsa-miR-221-3p | <a href="#">PRUNE1</a>   | prune exopolyphosphatase 1                                 |
| hsa-miR-221-3p | <a href="#">MRAP</a>     | melanocortin 2 receptor accessory protein                  |
| hsa-miR-221-3p | <a href="#">PALM2</a>    | paralemmin 2                                               |
| hsa-miR-221-3p | <a href="#">IFRD1</a>    | interferon related developmental regulator 1               |
| hsa-miR-221-3p | <a href="#">CDK8</a>     | cyclin dependent kinase 8                                  |
| hsa-miR-221-3p | <a href="#">ACTC1</a>    | actin, alpha, cardiac muscle 1                             |
| hsa-miR-221-3p | <a href="#">CNPY2</a>    | canopy FGF signaling regulator 2                           |

|                |                          |                                                        |
|----------------|--------------------------|--------------------------------------------------------|
| hsa-miR-221-3p | <a href="#">MAGEL2</a>   | MAGE family member L2                                  |
| hsa-miR-221-3p | <a href="#">TMEM165</a>  | transmembrane protein 165                              |
| hsa-miR-221-3p | <a href="#">AADAC</a>    | arylacetamide deacetylase                              |
| hsa-miR-221-3p | <a href="#">PLXDC2</a>   | plexin domain containing 2                             |
| hsa-miR-221-3p | <a href="#">SKP1</a>     | S-phase kinase associated protein 1                    |
| hsa-miR-221-3p | <a href="#">NDFIP1</a>   | Nedd4 family interacting protein 1                     |
| hsa-miR-221-3p | <a href="#">CTTN</a>     | cortactin                                              |
| hsa-miR-221-3p | <a href="#">RETREG1</a>  | reticulophagy regulator 1                              |
| hsa-miR-221-3p | <a href="#">CFHR5</a>    | complement factor H related 5                          |
| hsa-miR-221-3p | <a href="#">HLA-F</a>    | major histocompatibility complex, class I, F           |
| hsa-miR-221-3p | <a href="#">C16orf45</a> | chromosome 16 open reading frame 45                    |
| hsa-miR-221-3p | <a href="#">NDUFA1</a>   | NADH:ubiquinone oxidoreductase subunit A1              |
| hsa-miR-221-3p | <a href="#">ENTPD7</a>   | ectonucleoside triphosphate diphosphohydrolase 7       |
| hsa-miR-221-3p | <a href="#">PTPRM</a>    | protein tyrosine phosphatase, receptor type M          |
| hsa-miR-221-3p | <a href="#">DEPDC4</a>   | DEP domain containing 4                                |
| hsa-miR-221-3p | <a href="#">LRRN1</a>    | leucine rich repeat neuronal 1                         |
| hsa-miR-221-3p | <a href="#">KCNK2</a>    | potassium two pore domain channel subfamily K member 2 |
| hsa-miR-221-3p | <a href="#">CTCF</a>     | CCCTC-binding factor                                   |
| hsa-miR-221-3p | <a href="#">KLF3</a>     | Kruppel like factor 3                                  |
| hsa-miR-221-3p | <a href="#">HTT</a>      | huntingtin                                             |
| hsa-miR-221-3p | <a href="#">HEXIM1</a>   | HEXIM P-TEFb complex subunit 1                         |
| hsa-miR-221-3p | <a href="#">SATB1</a>    | SATB homeobox 1                                        |
| hsa-miR-221-3p | <a href="#">OLA1</a>     | Obg like ATPase 1                                      |
| hsa-miR-221-3p | <a href="#">SLC25A46</a> | solute carrier family 25 member 46                     |
| hsa-miR-221-3p | <a href="#">OSBPL3</a>   | oxysterol binding protein like 3                       |
| hsa-miR-221-3p | <a href="#">IPO5</a>     | importin 5                                             |
| hsa-miR-221-3p | <a href="#">FKTN</a>     | fukutin                                                |
| hsa-miR-221-3p | <a href="#">SOX11</a>    | SRY-box 11                                             |
| hsa-miR-221-3p | <a href="#">SLC40A1</a>  | solute carrier family 40 member 1                      |
| hsa-miR-221-3p | <a href="#">SPATS2L</a>  | spermatogenesis associated serine rich 2 like          |
| hsa-miR-221-3p | <a href="#">MAPK8</a>    | mitogen-activated protein kinase 8                     |
| hsa-miR-221-3p | <a href="#">GALC</a>     | galactosylceramidase                                   |
| hsa-miR-221-3p | <a href="#">FIGNL2</a>   | fidgetin like 2                                        |
| hsa-miR-221-3p | <a href="#">RREB1</a>    | ras responsive element binding protein 1               |
| hsa-miR-221-3p | <a href="#">MCMDC2</a>   | minichromosome maintenance domain containing 2         |
| hsa-miR-221-3p | <a href="#">BBS4</a>     | Bardet-Biedl syndrome 4                                |
| hsa-miR-221-3p | <a href="#">PGGT1B</a>   | protein geranylgeranyltransferase type I subunit beta  |
| hsa-miR-221-3p | <a href="#">FOS</a>      | Fos proto-oncogene, AP-1 transcription factor subunit  |
| hsa-miR-221-3p | <a href="#">TDRKH</a>    | tudor and KH domain containing                         |
| hsa-miR-221-3p | <a href="#">PRKAA2</a>   | protein kinase AMP-activated catalytic subunit alpha 2 |
| hsa-miR-221-3p | <a href="#">SLITRK6</a>  | SLIT and NTRK like family member 6                     |
| hsa-miR-221-3p | <a href="#">RBM18</a>    | RNA binding motif protein 18                           |
| hsa-miR-221-3p | <a href="#">TAOK1</a>    | TAO kinase 1                                           |
| hsa-miR-221-3p | <a href="#">CXCL11</a>   | C-X-C motif chemokine ligand 11                        |

|                |                           |                                                                   |
|----------------|---------------------------|-------------------------------------------------------------------|
| hsa-miR-221-3p | <a href="#">ETS2</a>      | ETS proto-oncogene 2, transcription factor                        |
| hsa-miR-221-3p | <a href="#">COX15</a>     | cytochrome c oxidase assembly homolog COX15                       |
| hsa-miR-221-3p | <a href="#">ATP2B3</a>    | ATPase plasma membrane Ca <sup>2+</sup> transporting 3            |
| hsa-miR-221-3p | <a href="#">ARID1A</a>    | AT-rich interaction domain 1A                                     |
| hsa-miR-221-3p | <a href="#">RAB14</a>     | RAB14, member RAS oncogene family                                 |
| hsa-miR-221-3p | <a href="#">NAV3</a>      | neuron navigator 3                                                |
| hsa-miR-221-3p | <a href="#">ZNF595</a>    | zinc finger protein 595                                           |
| hsa-miR-221-3p | <a href="#">ASB7</a>      | ankyrin repeat and SOCS box containing 7                          |
| hsa-miR-221-3p | <a href="#">ADHFE1</a>    | alcohol dehydrogenase, iron containing 1                          |
| hsa-miR-221-3p | <a href="#">KBTBD8</a>    | kelch repeat and BTB domain containing 8                          |
| hsa-miR-221-3p | <a href="#">PDZRN4</a>    | PDZ domain containing ring finger 4                               |
| hsa-miR-221-3p | <a href="#">STMN1</a>     | stathmin 1                                                        |
| hsa-miR-221-3p | <a href="#">PAFAH1B2</a>  | platelet activating factor acetylhydrolase 1b catalytic subunit 2 |
| hsa-miR-221-3p | <a href="#">CASP3</a>     | caspase 3                                                         |
| hsa-miR-221-3p | <a href="#">MAT2A</a>     | methionine adenosyltransferase 2A                                 |
| hsa-miR-221-3p | <a href="#">BCHE</a>      | butyrylcholinesterase                                             |
| hsa-miR-221-3p | <a href="#">DDX42</a>     | DEAD-box helicase 42                                              |
| hsa-miR-221-3p | <a href="#">GTF2B</a>     | general transcription factor IIB                                  |
| hsa-miR-221-3p | <a href="#">PITPNM2</a>   | phosphatidylinositol transfer protein membrane associated 2       |
| hsa-miR-221-3p | <a href="#">KLHL18</a>    | kelch like family member 18                                       |
| hsa-miR-221-3p | <a href="#">RNF44</a>     | ring finger protein 44                                            |
| hsa-miR-221-3p | <a href="#">SLC45A3</a>   | solute carrier family 45 member 3                                 |
| hsa-miR-221-3p | <a href="#">SLC6A9</a>    | solute carrier family 6 member 9                                  |
| hsa-miR-221-3p | <a href="#">LIFR</a>      | LIF receptor alpha                                                |
| hsa-miR-221-3p | <a href="#">ARHGAP42</a>  | Rho GTPase activating protein 42                                  |
| hsa-miR-221-3p | <a href="#">VEZF1</a>     | vascular endothelial zinc finger 1                                |
| hsa-miR-221-3p | <a href="#">RAB3GAP2</a>  | RAB3 GTPase activating non-catalytic protein subunit 2            |
| hsa-miR-221-3p | <a href="#">MTMR6</a>     | myotubularin related protein 6                                    |
| hsa-miR-221-3p | <a href="#">MED1</a>      | mediator complex subunit 1                                        |
| hsa-miR-221-3p | <a href="#">COL6A5</a>    | collagen type VI alpha 5 chain                                    |
| hsa-miR-221-3p | <a href="#">USP49</a>     | ubiquitin specific peptidase 49                                   |
| hsa-miR-221-3p | <a href="#">RGS8</a>      | regulator of G protein signaling 8                                |
| hsa-miR-221-3p | <a href="#">CD8A</a>      | CD8a molecule                                                     |
| hsa-miR-221-3p | <a href="#">MPRIIP</a>    | myosin phosphatase Rho interacting protein                        |
| hsa-miR-221-3p | <a href="#">KIAA1549L</a> | KIAA1549 like                                                     |
| hsa-miR-221-3p | <a href="#">C12orf77</a>  | chromosome 12 open reading frame 77                               |
| hsa-miR-221-3p | <a href="#">PRAMEF13</a>  | PRAME family member 13                                            |
| hsa-miR-221-3p | <a href="#">NIPA1</a>     | NIPA magnesium transporter 1                                      |
| hsa-miR-221-3p | <a href="#">RANBP2</a>    | RAN binding protein 2                                             |
| hsa-miR-221-3p | <a href="#">PRAMEF14</a>  | PRAME family member 14                                            |
| hsa-miR-221-3p | <a href="#">KCNH1</a>     | potassium voltage-gated channel subfamily H member 1              |
| hsa-miR-221-3p | <a href="#">SLC16A6</a>   | solute carrier family 16 member 6                                 |
| hsa-miR-221-3p | <a href="#">PCDH11X</a>   | protocadherin 11 X-linked                                         |



|                |                          |                                                               |
|----------------|--------------------------|---------------------------------------------------------------|
| hsa-miR-221-3p | <a href="#">CHORDC1</a>  | cysteine and histidine rich domain containing 1               |
| hsa-miR-221-3p | <a href="#">PCDH11Y</a>  | protocadherin 11 Y-linked                                     |
| hsa-miR-221-3p | <a href="#">BCL11B</a>   | BCL11B, BAF complex component                                 |
| hsa-miR-221-3p | <a href="#">C4orf33</a>  | chromosome 4 open reading frame 33                            |
| hsa-miR-221-3p | <a href="#">PRSS37</a>   | serine protease 37                                            |
| hsa-miR-221-3p | <a href="#">KCNA1</a>    | potassium voltage-gated channel subfamily A member 1          |
| hsa-miR-221-3p | <a href="#">LRP10</a>    | LDL receptor related protein 10                               |
| hsa-miR-221-3p | <a href="#">DYRK1A</a>   | dual specificity tyrosine phosphorylation regulated kinase 1A |
| hsa-miR-221-3p | <a href="#">SLAIN2</a>   | SLAIN motif family member 2                                   |
| hsa-miR-221-3p | <a href="#">DDX58</a>    | DExD/H-box helicase 58                                        |
| hsa-miR-221-3p | <a href="#">TAF9B</a>    | TATA-box binding protein associated factor 9b                 |
| hsa-miR-221-3p | <a href="#">CYP1B1</a>   | cytochrome P450 family 1 subfamily B member 1                 |
| hsa-miR-221-3p | <a href="#">UBN2</a>     | ubiquitin 2                                                   |
| hsa-miR-221-3p | <a href="#">GPATCH2L</a> | G-patch domain containing 2 like                              |
| hsa-miR-221-3p | <a href="#">SNCA</a>     | synuclein alpha                                               |
| hsa-miR-221-3p | <a href="#">WDR77</a>    | WD repeat domain 77                                           |
| hsa-miR-221-3p | <a href="#">IL1RAP</a>   | interleukin 1 receptor accessory protein                      |
| hsa-miR-221-3p | <a href="#">CHFR</a>     | checkpoint with forkhead and ring finger domains              |
| hsa-miR-221-3p | <a href="#">C16orf82</a> | chromosome 16 open reading frame 82                           |
| hsa-miR-221-3p | <a href="#">ZBTB20</a>   | zinc finger and BTB domain containing 20                      |
| hsa-miR-221-3p | <a href="#">ESYT1</a>    | extended synaptotagmin 1                                      |
| hsa-miR-221-3p | <a href="#">KRT81</a>    | keratin 81                                                    |
| hsa-miR-221-3p | <a href="#">DICER1</a>   | dicer 1, ribonuclease III                                     |
| hsa-miR-221-3p | <a href="#">MDM2</a>     | MDM2 proto-oncogene                                           |
| hsa-miR-221-3p | <a href="#">ZBTB41</a>   | zinc finger and BTB domain containing 41                      |
| hsa-miR-221-3p | <a href="#">NCAM1</a>    | neural cell adhesion molecule 1                               |
| hsa-miR-221-3p | <a href="#">MAP4K4</a>   | mitogen-activated protein kinase kinase kinase kinase 4       |
| hsa-miR-221-3p | <a href="#">MYOD1</a>    | myogenic differentiation 1                                    |
| hsa-miR-221-3p | <a href="#">GNB3</a>     | G protein subunit beta 3                                      |
| hsa-miR-221-3p | <a href="#">MMD2</a>     | monocyte to macrophage differentiation associated 2           |
| hsa-miR-221-3p | <a href="#">SLC25A21</a> | solute carrier family 25 member 21                            |
| hsa-miR-221-3p | <a href="#">ITPRID1</a>  | ITPR interacting domain containing 1                          |
| hsa-miR-221-3p | <a href="#">CAVIN4</a>   | caveolae associated protein 4                                 |
| hsa-miR-221-3p | <a href="#">AGO4</a>     | argonaute RISC catalytic component 4                          |
| hsa-miR-221-3p | <a href="#">AJAP1</a>    | adherens junctions associated protein 1                       |
| hsa-miR-221-3p | <a href="#">ITIH5</a>    | inter-alpha-trypsin inhibitor heavy chain family member 5     |
| hsa-miR-221-3p | <a href="#">CNKSR3</a>   | CNKSR family member 3                                         |
| hsa-miR-221-3p | <a href="#">CT45A5</a>   | cancer/testis antigen family 45 member A5                     |
| hsa-miR-221-3p | <a href="#">PKDCC</a>    | protein kinase domain containing, cytoplasmic                 |
| hsa-miR-221-3p | <a href="#">STAT2</a>    | signal transducer and activator of transcription 2            |
| hsa-miR-221-3p | <a href="#">A4GNT</a>    | alpha-1,4-N-acetylglucosaminyltransferase                     |
| hsa-miR-221-3p | <a href="#">CT45A10</a>  | cancer/testis antigen family 45 member A10                    |
| hsa-miR-221-3p | <a href="#">GCNT1</a>    | glucosaminyl (N-acetyl) transferase 1                         |

|                |                         |                                                               |
|----------------|-------------------------|---------------------------------------------------------------|
| hsa-miR-221-3p | <a href="#">ERI2</a>    | ERI1 exoribonuclease family member 2                          |
| hsa-miR-221-3p | <a href="#">APAF1</a>   | apoptotic peptidase activating factor 1                       |
| hsa-miR-221-3p | <a href="#">CLDN12</a>  | claudin 12                                                    |
| hsa-miR-221-3p | <a href="#">SAR1A</a>   | secretion associated Ras related GTPase 1A                    |
| hsa-miR-424-5p | <a href="#">PAPPA</a>   | pappalysin 1                                                  |
| hsa-miR-424-5p | <a href="#">FASN</a>    | fatty acid synthase                                           |
| hsa-miR-424-5p | <a href="#">UNC80</a>   | unc-80 homolog, NALCN channel complex subunit                 |
| hsa-miR-424-5p | <a href="#">FGF2</a>    | fibroblast growth factor 2                                    |
| hsa-miR-424-5p | <a href="#">TNRC6B</a>  | trinucleotide repeat containing 6B                            |
| hsa-miR-424-5p | <a href="#">PTPN4</a>   | protein tyrosine phosphatase, non-receptor type 4             |
| hsa-miR-424-5p | <a href="#">PHF19</a>   | PHD finger protein 19                                         |
| hsa-miR-424-5p | <a href="#">UBE2Q1</a>  | ubiquitin conjugating enzyme E2 Q1                            |
| hsa-miR-424-5p | <a href="#">LSM11</a>   | LSM11, U7 small nuclear RNA associated                        |
| hsa-miR-424-5p | <a href="#">ANKUB1</a>  | ankyrin repeat and ubiquitin domain containing 1              |
| hsa-miR-424-5p | <a href="#">CCNE1</a>   | cyclin E1                                                     |
| hsa-miR-424-5p | <a href="#">ATG14</a>   | autophagy related 14                                          |
| hsa-miR-424-5p | <a href="#">SLC13A3</a> | solute carrier family 13 member 3                             |
| hsa-miR-424-5p | <a href="#">ARIH1</a>   | ariadne RBR E3 ubiquitin protein ligase 1                     |
| hsa-miR-424-5p | <a href="#">BTRC</a>    | beta-transducin repeat containing E3 ubiquitin protein ligase |
| hsa-miR-424-5p | <a href="#">SPRYD3</a>  | SPRY domain containing 3                                      |
| hsa-miR-424-5p | <a href="#">ARL2</a>    | ADP ribosylation factor like GTPase 2                         |
| hsa-miR-424-5p | <a href="#">CASK</a>    | calcium/calmodulin dependent serine protein kinase            |
| hsa-miR-424-5p | <a href="#">NUP50</a>   | nucleoporin 50                                                |
| hsa-miR-424-5p | <a href="#">DCLK1</a>   | doublecortin like kinase 1                                    |
| hsa-miR-424-5p | <a href="#">DESI1</a>   | desumoylating isopeptidase 1                                  |
| hsa-miR-424-5p | <a href="#">ZBTB46</a>  | zinc finger and BTB domain containing 46                      |
| hsa-miR-424-5p | <a href="#">FGF7</a>    | fibroblast growth factor 7                                    |
| hsa-miR-424-5p | <a href="#">RECK</a>    | reversion inducing cysteine rich protein with kazal motifs    |
| hsa-miR-424-5p | <a href="#">AXIN2</a>   | axin 2                                                        |
| hsa-miR-424-5p | <a href="#">GPR63</a>   | G protein-coupled receptor 63                                 |
| hsa-miR-424-5p | <a href="#">SYNJ1</a>   | synaptojanin 1                                                |
| hsa-miR-424-5p | <a href="#">NECTIN1</a> | nectin cell adhesion molecule 1                               |
| hsa-miR-424-5p | <a href="#">GAREM1</a>  | GRB2 associated regulator of MAPK1 subtype 1                  |
| hsa-miR-424-5p | <a href="#">ABL2</a>    | ABL proto-oncogene 2, non-receptor tyrosine kinase            |
| hsa-miR-424-5p | <a href="#">FBXO21</a>  | F-box protein 21                                              |
| hsa-miR-424-5p | <a href="#">C2orf42</a> | chromosome 2 open reading frame 42                            |
| hsa-miR-424-5p | <a href="#">KIF1B</a>   | kinesin family member 1B                                      |
| hsa-miR-424-5p | <a href="#">LUZP1</a>   | leucine zipper protein 1                                      |
| hsa-miR-424-5p | <a href="#">TBL1XR1</a> | transducin beta like 1 X-linked receptor 1                    |
| hsa-miR-424-5p | <a href="#">SLC11A2</a> | solute carrier family 11 member 2                             |
| hsa-miR-424-5p | <a href="#">MOB3B</a>   | MOB kinase activator 3B                                       |
| hsa-miR-424-5p | <a href="#">ZBTB44</a>  | zinc finger and BTB domain containing 44                      |
| hsa-miR-424-5p | <a href="#">DMPK</a>    | DM1 protein kinase                                            |

|                |                          |                                                                          |
|----------------|--------------------------|--------------------------------------------------------------------------|
| hsa-miR-424-5p | <a href="#">MGAT4A</a>   | alpha-1,3-mannosyl-glycoprotein 4-beta-N-acetylglucosaminyltransferase A |
| hsa-miR-424-5p | <a href="#">EPHB2</a>    | EPH receptor B2                                                          |
| hsa-miR-424-5p | <a href="#">ANO3</a>     | anoctamin 3                                                              |
| hsa-miR-424-5p | <a href="#">SLC9A6</a>   | solute carrier family 9 member A6                                        |
| hsa-miR-424-5p | <a href="#">APLN</a>     | apelin                                                                   |
| hsa-miR-424-5p | <a href="#">IPO7</a>     | importin 7                                                               |
| hsa-miR-424-5p | <a href="#">RASGEF1B</a> | RasGEF domain family member 1B                                           |
| hsa-miR-424-5p | <a href="#">ATG9A</a>    | autophagy related 9A                                                     |
| hsa-miR-424-5p | <a href="#">CPEB2</a>    | cytoplasmic polyadenylation element binding protein 2                    |
| hsa-miR-424-5p | <a href="#">AHCYL2</a>   | adenosylhomocysteinase like 2                                            |
| hsa-miR-424-5p | <a href="#">UBE4B</a>    | ubiquitination factor E4B                                                |
| hsa-miR-424-5p | <a href="#">CYB561A3</a> | cytochrome b561 family member A3                                         |
| hsa-miR-424-5p | <a href="#">ARL3</a>     | ADP ribosylation factor like GTPase 3                                    |
| hsa-miR-424-5p | <a href="#">PLAG1</a>    | PLAG1 zinc finger                                                        |
| hsa-miR-424-5p | <a href="#">CDCA4</a>    | cell division cycle associated 4                                         |
| hsa-miR-424-5p | <a href="#">CACNA1E</a>  | calcium voltage-gated channel subunit alpha1 E                           |
| hsa-miR-424-5p | <a href="#">PISD</a>     | phosphatidylserine decarboxylase                                         |
| hsa-miR-424-5p | <a href="#">KCNJ2</a>    | potassium voltage-gated channel subfamily J member 2                     |
| hsa-miR-424-5p | <a href="#">UBE2V1</a>   | ubiquitin conjugating enzyme E2 V1                                       |
| hsa-miR-424-5p | <a href="#">SPRED1</a>   | sprouty related EVH1 domain containing 1                                 |
| hsa-miR-424-5p | <a href="#">PPM1E</a>    | protein phosphatase, Mg <sup>2+</sup> /Mn <sup>2+</sup> dependent 1E     |
| hsa-miR-424-5p | <a href="#">MTMR3</a>    | myotubularin related protein 3                                           |
| hsa-miR-424-5p | <a href="#">SHOC2</a>    | SHOC2, leucine rich repeat scaffold protein                              |
| hsa-miR-424-5p | <a href="#">TLK1</a>     | tousled like kinase 1                                                    |
| hsa-miR-424-5p | <a href="#">LURAP1L</a>  | leucine rich adaptor protein 1 like                                      |
| hsa-miR-424-5p | <a href="#">PTPN3</a>    | protein tyrosine phosphatase, non-receptor type 3                        |
| hsa-miR-424-5p | <a href="#">TMEM100</a>  | transmembrane protein 100                                                |
| hsa-miR-424-5p | <a href="#">RASSF8</a>   | Ras association domain family member 8                                   |
| hsa-miR-424-5p | <a href="#">FBXW7</a>    | F-box and WD repeat domain containing 7                                  |
| hsa-miR-424-5p | <a href="#">AKT3</a>     | AKT serine/threonine kinase 3                                            |
| hsa-miR-424-5p | <a href="#">MYB</a>      | MYB proto-oncogene, transcription factor                                 |
| hsa-miR-424-5p | <a href="#">GRM7</a>     | glutamate metabotropic receptor 7                                        |
| hsa-miR-424-5p | <a href="#">CCND2</a>    | cyclin D2                                                                |
| hsa-miR-424-5p | <a href="#">WEE1</a>     | WEE1 G2 checkpoint kinase                                                |
| hsa-miR-424-5p | <a href="#">STOX2</a>    | storkhead box 2                                                          |
| hsa-miR-424-5p | <a href="#">UBN2</a>     | ubiquitin 2                                                              |
| hsa-miR-424-5p | <a href="#">CYP26B1</a>  | cytochrome P450 family 26 subfamily B member 1                           |
| hsa-miR-424-5p | <a href="#">ZCCHC3</a>   | zinc finger CCHC-type containing 3                                       |
| hsa-miR-424-5p | <a href="#">RNF144B</a>  | ring finger protein 144B                                                 |
| hsa-miR-424-5p | <a href="#">SALL4</a>    | spalt like transcription factor 4                                        |
| hsa-miR-424-5p | <a href="#">TBPL1</a>    | TATA-box binding protein like 1                                          |
| hsa-miR-424-5p | <a href="#">KDSR</a>     | 3-ketodihydrosphingosine reductase                                       |
| hsa-miR-424-5p | <a href="#">SCN8A</a>    | sodium voltage-gated channel alpha subunit 8                             |
| hsa-miR-424-5p | <a href="#">SEMA6D</a>   | semaphorin 6D                                                            |

|                |                           |                                                                           |
|----------------|---------------------------|---------------------------------------------------------------------------|
| hsa-miR-424-5p | <a href="#">SREK1</a>     | splicing regulatory glutamic acid and lysine rich protein 1               |
| hsa-miR-424-5p | <a href="#">HTR2A</a>     | 5-hydroxytryptamine receptor 2A                                           |
| hsa-miR-424-5p | <a href="#">RAB11FIP2</a> | RAB11 family interacting protein 2                                        |
| hsa-miR-424-5p | <a href="#">DNAJB4</a>    | DnaJ heat shock protein family (Hsp40) member B4                          |
| hsa-miR-424-5p | <a href="#">KIF5C</a>     | kinesin family member 5C                                                  |
| hsa-miR-424-5p | <a href="#">GPATCH8</a>   | G-patch domain containing 8                                               |
| hsa-miR-424-5p | <a href="#">N4BP1</a>     | NEDD4 binding protein 1                                                   |
| hsa-miR-424-5p | <a href="#">ZNF691</a>    | zinc finger protein 691                                                   |
| hsa-miR-424-5p | <a href="#">MAMSTR</a>    | MEF2 activating motif and SAP domain containing transcriptional regulator |
| hsa-miR-424-5p | <a href="#">ZMAT3</a>     | zinc finger matrin-type 3                                                 |
| hsa-miR-424-5p | <a href="#">UBFD1</a>     | ubiquitin family domain containing 1                                      |
| hsa-miR-424-5p | <a href="#">ARMH4</a>     | armadillo-like helical domain containing 4                                |
| hsa-miR-424-5p | <a href="#">HIPK2</a>     | homeodomain interacting protein kinase 2                                  |
| hsa-miR-424-5p | <a href="#">CEP55</a>     | centrosomal protein 55                                                    |
| hsa-miR-424-5p | <a href="#">MKX</a>       | mohawk homeobox                                                           |
| hsa-miR-424-5p | <a href="#">KIF23</a>     | kinesin family member 23                                                  |
| hsa-miR-424-5p | <a href="#">CFAP45</a>    | cilia and flagella associated protein 45                                  |
| hsa-miR-424-5p | <a href="#">CNOT6L</a>    | CCR4-NOT transcription complex subunit 6 like                             |
| hsa-miR-424-5p | <a href="#">RFX3</a>      | regulatory factor X3                                                      |
| hsa-miR-424-5p | <a href="#">TFAP2A</a>    | transcription factor AP-2 alpha                                           |
| hsa-miR-424-5p | <a href="#">PCMT1</a>     | protein-L-isoaspartate (D-aspartate) O-methyltransferase                  |
| hsa-miR-424-5p | <a href="#">EDA</a>       | ectodysplasin A                                                           |
| hsa-miR-424-5p | <a href="#">SEC24A</a>    | SEC24 homolog A, COPII coat complex component                             |
| hsa-miR-424-5p | <a href="#">PAFAH1B1</a>  | platelet activating factor acetylhydrolase 1b regulatory subunit 1        |
| hsa-miR-424-5p | <a href="#">SLC25A37</a>  | solute carrier family 25 member 37                                        |
| hsa-miR-424-5p | <a href="#">DDX3X</a>     | DEAD-box helicase 3 X-linked                                              |
| hsa-miR-424-5p | <a href="#">MYLK</a>      | myosin light chain kinase                                                 |
| hsa-miR-424-5p | <a href="#">SETD3</a>     | SET domain containing 3, actin histidine methyltransferase                |
| hsa-miR-424-5p | <a href="#">CCDC6</a>     | coiled-coil domain containing 6                                           |
| hsa-miR-424-5p | <a href="#">ARHGDIA</a>   | Rho GDP dissociation inhibitor alpha                                      |
| hsa-miR-424-5p | <a href="#">NAPG</a>      | NSF attachment protein gamma                                              |
| hsa-miR-424-5p | <a href="#">GABARAPL1</a> | GABA type A receptor associated protein like 1                            |
| hsa-miR-424-5p | <a href="#">FGFR1</a>     | fibroblast growth factor receptor 1                                       |
| hsa-miR-424-5p | <a href="#">JPH3</a>      | junctophilin 3                                                            |
| hsa-miR-424-5p | <a href="#">USP42</a>     | ubiquitin specific peptidase 42                                           |
| hsa-miR-424-5p | <a href="#">STRADE</a>    | STE20 related adaptor beta                                                |
| hsa-miR-424-5p | <a href="#">LRRN3</a>     | leucine rich repeat neuronal 3                                            |
| hsa-miR-424-5p | <a href="#">STXBP5</a>    | syntaxin binding protein 5                                                |
| hsa-miR-424-5p | <a href="#">ZFHx4</a>     | zinc finger homeobox 4                                                    |
| hsa-miR-424-5p | <a href="#">ZNF622</a>    | zinc finger protein 622                                                   |
| hsa-miR-424-5p | <a href="#">OOEP</a>      | oocyte expressed protein                                                  |
| hsa-miR-424-5p | <a href="#">CBX2</a>      | chromobox 2                                                               |

|                |                          |                                                                        |
|----------------|--------------------------|------------------------------------------------------------------------|
| hsa-miR-424-5p | <a href="#">SRPRA</a>    | SRP receptor subunit alpha                                             |
| hsa-miR-424-5p | <a href="#">KLHL2</a>    | kelch like family member 2                                             |
| hsa-miR-424-5p | <a href="#">VEGFA</a>    | vascular endothelial growth factor A                                   |
| hsa-miR-424-5p | <a href="#">ZBTB34</a>   | zinc finger and BTB domain containing 34                               |
| hsa-miR-424-5p | <a href="#">KIF5B</a>    | kinesin family member 5B                                               |
| hsa-miR-424-5p | <a href="#">MYO5A</a>    | myosin VA                                                              |
| hsa-miR-424-5p | <a href="#">CASR</a>     | calcium sensing receptor                                               |
| hsa-miR-424-5p | <a href="#">LRIG2</a>    | leucine rich repeats and immunoglobulin like domains 2                 |
| hsa-miR-424-5p | <a href="#">SMURF1</a>   | SMAD specific E3 ubiquitin protein ligase 1                            |
| hsa-miR-424-5p | <a href="#">ZNF367</a>   | zinc finger protein 367                                                |
| hsa-miR-424-5p | <a href="#">USP25</a>    | ubiquitin specific peptidase 25                                        |
| hsa-miR-424-5p | <a href="#">ACTR2</a>    | ARP2 actin related protein 2 homolog                                   |
| hsa-miR-424-5p | <a href="#">PLPP1</a>    | phospholipid phosphatase 1                                             |
| hsa-miR-424-5p | <a href="#">RNF217</a>   | ring finger protein 217                                                |
| hsa-miR-424-5p | <a href="#">BTAF1</a>    | B-TFIID TATA-box binding protein associated factor 1                   |
| hsa-miR-424-5p | <a href="#">TRANK1</a>   | tetratricopeptide repeat and ankyrin repeat containing 1               |
| hsa-miR-424-5p | <a href="#">CHAC1</a>    | ChaC glutathione specific gamma-glutamylcyclotransferase 1             |
| hsa-miR-424-5p | <a href="#">PTPRR</a>    | protein tyrosine phosphatase, receptor type R                          |
| hsa-miR-424-5p | <a href="#">TNFSF13B</a> | TNF superfamily member 13b                                             |
| hsa-miR-424-5p | <a href="#">IPPK</a>     | inositol-pentakisphosphate 2-kinase                                    |
| hsa-miR-424-5p | <a href="#">ZBTB39</a>   | zinc finger and BTB domain containing 39                               |
| hsa-miR-424-5p | <a href="#">WNK3</a>     | WNK lysine deficient protein kinase 3                                  |
| hsa-miR-424-5p | <a href="#">SUO</a>      | SUN domain containing ossification factor                              |
| hsa-miR-424-5p | <a href="#">LATS1</a>    | large tumor suppressor kinase 1                                        |
| hsa-miR-424-5p | <a href="#">MAP2K1</a>   | mitogen-activated protein kinase kinase 1                              |
| hsa-miR-424-5p | <a href="#">AMOTL1</a>   | angiomin like 1                                                        |
| hsa-miR-424-5p | <a href="#">RBPJ</a>     | recombination signal binding protein for immunoglobulin kappa J region |
| hsa-miR-424-5p | <a href="#">TMEM183A</a> | transmembrane protein 183A                                             |
| hsa-miR-424-5p | <a href="#">STXBP3</a>   | syntaxin binding protein 3                                             |
| hsa-miR-424-5p | <a href="#">DCP1A</a>    | decapping mRNA 1A                                                      |
| hsa-miR-424-5p | <a href="#">MYBL1</a>    | MYB proto-oncogene like 1                                              |
| hsa-miR-424-5p | <a href="#">KIF21A</a>   | kinesin family member 21A                                              |
| hsa-miR-424-5p | <a href="#">GHR</a>      | growth hormone receptor                                                |
| hsa-miR-424-5p | <a href="#">SUMO3</a>    | small ubiquitin-like modifier 3                                        |
| hsa-miR-424-5p | <a href="#">AVL9</a>     | AVL9 cell migration associated                                         |
| hsa-miR-424-5p | <a href="#">PIAS2</a>    | protein inhibitor of activated STAT 2                                  |
| hsa-miR-424-5p | <a href="#">FBXL20</a>   | F-box and leucine rich repeat protein 20                               |
| hsa-miR-424-5p | <a href="#">UBE4A</a>    | ubiquitination factor E4A                                              |
| hsa-miR-424-5p | <a href="#">SLIT2</a>    | slit guidance ligand 2                                                 |
| hsa-miR-424-5p | <a href="#">XPO7</a>     | exportin 7                                                             |
| hsa-miR-424-5p | <a href="#">MFN2</a>     | mitofusin 2                                                            |
| hsa-miR-424-5p | <a href="#">CHD2</a>     | chromodomain helicase DNA binding protein 2                            |
| hsa-miR-424-5p | <a href="#">POU2F1</a>   | POU class 2 homeobox 1                                                 |

|                |                          |                                                                      |
|----------------|--------------------------|----------------------------------------------------------------------|
| hsa-miR-424-5p | <a href="#">HSPA4L</a>   | heat shock protein family A (Hsp70) member 4 like                    |
| hsa-miR-424-5p | <a href="#">COP1</a>     | COP1, E3 ubiquitin ligase                                            |
| hsa-miR-424-5p | <a href="#">ADAMTS3</a>  | ADAM metalloproteinase with thrombospondin type 1 motif 3            |
| hsa-miR-424-5p | <a href="#">P3H2</a>     | prolyl 3-hydroxylase 2                                               |
| hsa-miR-424-5p | <a href="#">RAD23B</a>   | RAD23 homolog B, nucleotide excision repair protein                  |
| hsa-miR-424-5p | <a href="#">FOXK1</a>    | forkhead box K1                                                      |
| hsa-miR-424-5p | <a href="#">RNF10</a>    | ring finger protein 10                                               |
| hsa-miR-424-5p | <a href="#">PLXNA4</a>   | plexin A4                                                            |
| hsa-miR-424-5p | <a href="#">PPM1A</a>    | protein phosphatase, Mg <sup>2+</sup> /Mn <sup>2+</sup> dependent 1A |
| hsa-miR-424-5p | <a href="#">LITAF</a>    | lipopolysaccharide induced TNF factor                                |
| hsa-miR-424-5p | <a href="#">RETREG2</a>  | reticulophagy regulator family member 2                              |
| hsa-miR-424-5p | <a href="#">KANK1</a>    | KN motif and ankyrin repeat domains 1                                |
| hsa-miR-424-5p | <a href="#">PPP2R1B</a>  | protein phosphatase 2 scaffold subunit Abeta                         |
| hsa-miR-424-5p | <a href="#">SYDE2</a>    | synapse defective Rho GTPase homolog 2                               |
| hsa-miR-424-5p | <a href="#">RPS6KA3</a>  | ribosomal protein S6 kinase A3                                       |
| hsa-miR-424-5p | <a href="#">CHEK1</a>    | checkpoint kinase 1                                                  |
| hsa-miR-424-5p | <a href="#">OMG</a>      | oligodendrocyte myelin glycoprotein                                  |
| hsa-miR-424-5p | <a href="#">PCDH17</a>   | protocadherin 17                                                     |
| hsa-miR-424-5p | <a href="#">PLXNC1</a>   | plexin C1                                                            |
| hsa-miR-424-5p | <a href="#">GALNT13</a>  | polypeptide N-acetylgalactosaminyltransferase 13                     |
| hsa-miR-424-5p | <a href="#">CBX4</a>     | chromobox 4                                                          |
| hsa-miR-424-5p | <a href="#">ACVR2A</a>   | activin A receptor type 2A                                           |
| hsa-miR-424-5p | <a href="#">ATXN2</a>    | ataxin 2                                                             |
| hsa-miR-424-5p | <a href="#">SIK1</a>     | salt inducible kinase 1                                              |
| hsa-miR-424-5p | <a href="#">SMAD7</a>    | SMAD family member 7                                                 |
| hsa-miR-424-5p | <a href="#">SALL1</a>    | spalt like transcription factor 1                                    |
| hsa-miR-424-5p | <a href="#">YTHDC1</a>   | YTH domain containing 1                                              |
| hsa-miR-424-5p | <a href="#">ZNRF3</a>    | zinc and ring finger 3                                               |
| hsa-miR-424-5p | <a href="#">CLOCK</a>    | clock circadian regulator                                            |
| hsa-miR-424-5p | <a href="#">KRTAP4-6</a> | keratin associated protein 4-6                                       |
| hsa-miR-424-5p | <a href="#">ADGRL1</a>   | adhesion G protein-coupled receptor L1                               |
| hsa-miR-424-5p | <a href="#">AGO4</a>     | argonaute RISC catalytic component 4                                 |
| hsa-miR-424-5p | <a href="#">ASH1L</a>    | ASH1 like histone lysine methyltransferase                           |
| hsa-miR-424-5p | <a href="#">ZFX3</a>     | zinc finger homeobox 3                                               |
| hsa-miR-424-5p | <a href="#">USP31</a>    | ubiquitin specific peptidase 31                                      |
| hsa-miR-424-5p | <a href="#">HSPG2</a>    | heparan sulfate proteoglycan 2                                       |
| hsa-miR-424-5p | <a href="#">CD2AP</a>    | CD2 associated protein                                               |
| hsa-miR-424-5p | <a href="#">CCNT1</a>    | cyclin T1                                                            |
| hsa-miR-424-5p | <a href="#">PPP1R11</a>  | protein phosphatase 1 regulatory inhibitor subunit 11                |
| hsa-miR-424-5p | <a href="#">COL12A1</a>  | collagen type XII alpha 1 chain                                      |
| hsa-miR-424-5p | <a href="#">GATAD2A</a>  | GATA zinc finger domain containing 2A                                |
| hsa-miR-424-5p | <a href="#">RARβ</a>     | retinoic acid receptor beta                                          |
| hsa-miR-424-5p | <a href="#">LAMP3</a>    | lysosomal associated membrane protein 3                              |
| hsa-miR-424-5p | <a href="#">TMEM245</a>  | transmembrane protein 245                                            |



|                |                           |                                                                   |
|----------------|---------------------------|-------------------------------------------------------------------|
| hsa-miR-424-5p | <a href="#">MEOX2</a>     | mesenchyme homeobox 2                                             |
| hsa-miR-424-5p | <a href="#">DIXDC1</a>    | DIX domain containing 1                                           |
| hsa-miR-424-5p | <a href="#">TGFB3</a>     | transforming growth factor beta receptor 3                        |
| hsa-miR-424-5p | <a href="#">CCND1</a>     | cyclin D1                                                         |
| hsa-miR-424-5p | <a href="#">FAM133B</a>   | family with sequence similarity 133 member B                      |
| hsa-miR-424-5p | <a href="#">ELMSAN1</a>   | ELM2 and Myb/SANT domain containing 1                             |
| hsa-miR-424-5p | <a href="#">STK33</a>     | serine/threonine kinase 33                                        |
| hsa-miR-424-5p | <a href="#">AK4</a>       | adenylate kinase 4                                                |
| hsa-miR-424-5p | <a href="#">C1orf21</a>   | chromosome 1 open reading frame 21                                |
| hsa-miR-424-5p | <a href="#">SOCS6</a>     | suppressor of cytokine signaling 6                                |
| hsa-miR-424-5p | <a href="#">SLC12A2</a>   | solute carrier family 12 member 2                                 |
| hsa-miR-424-5p | <a href="#">INSR</a>      | insulin receptor                                                  |
| hsa-miR-424-5p | <a href="#">TMCC1</a>     | transmembrane and coiled-coil domain family 1                     |
| hsa-miR-424-5p | <a href="#">SEL1L3</a>    | SEL1L family member 3                                             |
| hsa-miR-424-5p | <a href="#">UNC5D</a>     | unc-5 netrin receptor D                                           |
| hsa-miR-424-5p | <a href="#">JARID2</a>    | jumonji and AT-rich interaction domain containing 2               |
| hsa-miR-424-5p | <a href="#">SIRT4</a>     | sirtuin 4                                                         |
| hsa-miR-424-5p | <a href="#">TMEM178B</a>  | transmembrane protein 178B                                        |
| hsa-miR-424-5p | <a href="#">SEMA3A</a>    | semaphorin 3A                                                     |
| hsa-miR-424-5p | <a href="#">LRIG1</a>     | leucine rich repeats and immunoglobulin like domains 1            |
| hsa-miR-424-5p | <a href="#">TMC7</a>      | transmembrane channel like 7                                      |
| hsa-miR-424-5p | <a href="#">RPS6KA6</a>   | ribosomal protein S6 kinase A6                                    |
| hsa-miR-424-5p | <a href="#">EZH1</a>      | enhancer of zeste 1 polycomb repressive complex 2 subunit         |
| hsa-miR-424-5p | <a href="#">PTH</a>       | parathyroid hormone                                               |
| hsa-miR-424-5p | <a href="#">PAFAH1B2</a>  | platelet activating factor acetylhydrolase 1b catalytic subunit 2 |
| hsa-miR-424-5p | <a href="#">SPTLC1</a>    | serine palmitoyltransferase long chain base subunit 1             |
| hsa-miR-424-5p | <a href="#">KRTAP11-1</a> | keratin associated protein 11-1                                   |
| hsa-miR-424-5p | <a href="#">DENND1B</a>   | DENN domain containing 1B                                         |
| hsa-miR-424-5p | <a href="#">ZNF449</a>    | zinc finger protein 449                                           |
| hsa-miR-424-5p | <a href="#">AMOT</a>      | angiomotin                                                        |
| hsa-miR-424-5p | <a href="#">DLL1</a>      | delta like canonical Notch ligand 1                               |
| hsa-miR-424-5p | <a href="#">SLC20A2</a>   | solute carrier family 20 member 2                                 |
| hsa-miR-424-5p | <a href="#">FERMT2</a>    | fermitin family member 2                                          |
| hsa-miR-424-5p | <a href="#">ILDR2</a>     | immunoglobulin like domain containing receptor 2                  |
| hsa-miR-424-5p | <a href="#">CSRNP1</a>    | cysteine and serine rich nuclear protein 1                        |
| hsa-miR-424-5p | <a href="#">NAA25</a>     | N(alpha)-acetyltransferase 25, NatB auxiliary subunit             |
| hsa-miR-424-5p | <a href="#">ELL</a>       | elongation factor for RNA polymerase II                           |
| hsa-miR-424-5p | <a href="#">ZC3H13</a>    | zinc finger CCCH-type containing 13                               |
| hsa-miR-424-5p | <a href="#">CSDE1</a>     | cold shock domain containing E1                                   |
| hsa-miR-424-5p | <a href="#">CPEB3</a>     | cytoplasmic polyadenylation element binding protein 3             |
| hsa-miR-424-5p | <a href="#">MEX3C</a>     | mex-3 RNA binding family member C                                 |
| hsa-miR-424-5p | <a href="#">BAG4</a>      | BCL2 associated athanogene 4                                      |
| hsa-miR-424-5p | <a href="#">VPS33B</a>    | VPS33B, late endosome and lysosome associated                     |

|                |                         |                                                         |
|----------------|-------------------------|---------------------------------------------------------|
| hsa-miR-424-5p | <a href="#">CACUL1</a>  | CDK2 associated cullin domain 1                         |
| hsa-miR-424-5p | <a href="#">TBP</a>     | TATA-box binding protein                                |
| hsa-miR-424-5p | <a href="#">ARFGAP2</a> | ADP ribosylation factor GTPase activating protein 2     |
| hsa-miR-424-5p | <a href="#">TRIM66</a>  | tripartite motif containing 66                          |
| hsa-miR-424-5p | <a href="#">E2F3</a>    | E2F transcription factor 3                              |
| hsa-miR-424-5p | <a href="#">WNT3A</a>   | Wnt family member 3A                                    |
| hsa-miR-424-5p | <a href="#">ABHD2</a>   | abhydrolase domain containing 2                         |
| hsa-miR-424-5p | <a href="#">ZNRF2</a>   | zinc and ring finger 2                                  |
| hsa-miR-424-5p | <a href="#">ATXN1L</a>  | ataxin 1 like                                           |
| hsa-miR-424-5p | <a href="#">CC2D1B</a>  | coiled-coil and C2 domain containing 1B                 |
| hsa-miR-424-5p | <a href="#">KCNK10</a>  | potassium two pore domain channel subfamily K member 10 |
| hsa-miR-424-5p | <a href="#">SIK1B</a>   | salt inducible kinase 1B (putative)                     |
| hsa-miR-424-5p | <a href="#">SYNRG</a>   | synergin gamma                                          |
| hsa-miR-424-5p | <a href="#">CBX6</a>    | chromobox 6                                             |
| hsa-miR-424-5p | <a href="#">CD47</a>    | CD47 molecule                                           |
| hsa-miR-424-5p | <a href="#">TAB3</a>    | TGF-beta activated kinase 1 (MAP3K7) binding protein 3  |
| hsa-miR-424-5p | <a href="#">NOS1</a>    | nitric oxide synthase 1                                 |
| hsa-miR-424-5p | <a href="#">IFT74</a>   | intraflagellar transport 74                             |
| hsa-miR-424-5p | <a href="#">SERBP1</a>  | SERPINE1 mRNA binding protein 1                         |
| hsa-miR-424-5p | <a href="#">ETNK1</a>   | ethanolamine kinase 1                                   |
| hsa-miR-424-5p | <a href="#">G2E3</a>    | G2/M-phase specific E3 ubiquitin protein ligase         |
| hsa-miR-424-5p | <a href="#">ATXN7L2</a> | ataxin 7 like 2                                         |
| hsa-miR-424-5p | <a href="#">AMER1</a>   | APC membrane recruitment protein 1                      |
| hsa-miR-424-5p | <a href="#">TRABD2B</a> | TraB domain containing 2B                               |
| hsa-miR-424-5p | <a href="#">SEMA5B</a>  | semaphorin 5B                                           |
| hsa-miR-424-5p | <a href="#">NHLRC2</a>  | NHL repeat containing 2                                 |
| hsa-miR-424-5p | <a href="#">NR2C2</a>   | nuclear receptor subfamily 2 group C member 2           |
| hsa-miR-424-5p | <a href="#">SMIM13</a>  | small integral membrane protein 13                      |
| hsa-miR-424-5p | <a href="#">CDC25A</a>  | cell division cycle 25A                                 |
| hsa-miR-424-5p | <a href="#">DDX3Y</a>   | DEAD-box helicase 3 Y-linked                            |
| hsa-miR-424-5p | <a href="#">TCAIM</a>   | T cell activation inhibitor, mitochondrial              |
| hsa-miR-424-5p | <a href="#">WIPI2</a>   | WD repeat domain, phosphoinositide interacting 2        |
| hsa-miR-424-5p | <a href="#">TMEM268</a> | transmembrane protein 268                               |
| hsa-miR-424-5p | <a href="#">ZMYM2</a>   | zinc finger MYM-type containing 2                       |
| hsa-miR-424-5p | <a href="#">RASEF</a>   | RAS and EF-hand domain containing                       |
| hsa-miR-424-5p | <a href="#">ATXN7L1</a> | ataxin 7 like 1                                         |
| hsa-miR-424-5p | <a href="#">PDZD8</a>   | PDZ domain containing 8                                 |
| hsa-miR-424-5p | <a href="#">EGLN1</a>   | egl-9 family hypoxia inducible factor 1                 |
| hsa-miR-424-5p | <a href="#">sept-02</a> | septin 2                                                |
| hsa-miR-424-5p | <a href="#">MAP3K13</a> | mitogen-activated protein kinase kinase kinase 13       |
| hsa-miR-424-5p | <a href="#">RBM6</a>    | RNA binding motif protein 6                             |
| hsa-miR-424-5p | <a href="#">CDC37L1</a> | cell division cycle 37 like 1                           |
| hsa-miR-424-5p | <a href="#">MED26</a>   | mediator complex subunit 26                             |

|                |                                |                                                                            |
|----------------|--------------------------------|----------------------------------------------------------------------------|
| hsa-miR-424-5p | <a href="#">HERC6</a>          | HECT and RLD domain containing E3 ubiquitin protein ligase family member 6 |
| hsa-miR-424-5p | <a href="#">DRD1</a>           | dopamine receptor D1                                                       |
| hsa-miR-424-5p | <a href="#">CXCR5</a>          | C-X-C motif chemokine receptor 5                                           |
| hsa-miR-424-5p | <a href="#">PDIA6</a>          | protein disulfide isomerase family A member 6                              |
| hsa-miR-424-5p | <a href="#">RBBP6</a>          | RB binding protein 6, ubiquitin ligase                                     |
| hsa-miR-424-5p | <a href="#">GSTCD</a>          | glutathione S-transferase C-terminal domain containing                     |
| hsa-miR-424-5p | <a href="#">USP15</a>          | ubiquitin specific peptidase 15                                            |
| hsa-miR-424-5p | <a href="#">SYT3</a>           | synaptotagmin 3                                                            |
| hsa-miR-424-5p | <a href="#">PAG1</a>           | phosphoprotein membrane anchor with glycosphingolipid microdomains 1       |
| hsa-miR-424-5p | <a href="#">MKNK1</a>          | MAP kinase interacting serine/threonine kinase 1                           |
| hsa-miR-424-5p | <a href="#">TLL1</a>           | tolloid like 1                                                             |
| hsa-miR-424-5p | <a href="#">WNT7A</a>          | Wnt family member 7A                                                       |
| hsa-miR-424-5p | <a href="#">QKI</a>            | QKI, KH domain containing RNA binding                                      |
| hsa-miR-424-5p | <a href="#">RAB9B</a>          | RAB9B, member RAS oncogene family                                          |
| hsa-miR-424-5p | <a href="#">BCL11B</a>         | BCL11B, BAF complex component                                              |
| hsa-miR-424-5p | <a href="#">TMEM189-UBE2V1</a> | TMEM189-UBE2V1 readthrough                                                 |
| hsa-miR-424-5p | <a href="#">LRP6</a>           | LDL receptor related protein 6                                             |
| hsa-miR-424-5p | <a href="#">RS1</a>            | retinoschisin 1                                                            |
| hsa-miR-424-5p | <a href="#">SON</a>            | SON DNA binding protein                                                    |
| hsa-miR-424-5p | <a href="#">BZW1</a>           | basic leucine zipper and W2 domains 1                                      |
| hsa-miR-424-5p | <a href="#">PIP4P2</a>         | phosphatidylinositol-4,5-bisphosphate 4-phosphatase 2                      |
| hsa-miR-424-5p | <a href="#">KCNG4</a>          | potassium voltage-gated channel modifier subfamily G member 4              |
| hsa-miR-424-5p | <a href="#">TFCP2L1</a>        | transcription factor CP2 like 1                                            |
| hsa-miR-424-5p | <a href="#">DYRK1B</a>         | dual specificity tyrosine phosphorylation regulated kinase 1B              |
| hsa-miR-424-5p | <a href="#">CLUH</a>           | clustered mitochondria homolog                                             |
| hsa-miR-424-5p | <a href="#">CACNA2D1</a>       | calcium voltage-gated channel auxiliary subunit alpha2delta 1              |
| hsa-miR-424-5p | <a href="#">RREB1</a>          | ras responsive element binding protein 1                                   |
| hsa-miR-424-5p | <a href="#">SLC36A1</a>        | solute carrier family 36 member 1                                          |
| hsa-miR-424-5p | <a href="#">ZSCAN31</a>        | zinc finger and SCAN domain containing 31                                  |
| hsa-miR-424-5p | <a href="#">TENM2</a>          | teneurin transmembrane protein 2                                           |
| hsa-miR-424-5p | <a href="#">PDE3B</a>          | phosphodiesterase 3B                                                       |
| hsa-miR-424-5p | <a href="#">ATXN7L3</a>        | ataxin 7 like 3                                                            |
| hsa-miR-424-5p | <a href="#">UBQLNL</a>         | ubiquilin like                                                             |
| hsa-miR-424-5p | <a href="#">CHUK</a>           | conserved helix-loop-helix ubiquitous kinase                               |
| hsa-miR-424-5p | <a href="#">WWC1</a>           | WW and C2 domain containing 1                                              |
| hsa-miR-424-5p | <a href="#">CDC42SE2</a>       | CDC42 small effector 2                                                     |
| hsa-miR-424-5p | <a href="#">CUX1</a>           | cut like homeobox 1                                                        |
| hsa-miR-424-5p | <a href="#">SNX16</a>          | sorting nexin 16                                                           |
| hsa-miR-424-5p | <a href="#">PARVA</a>          | parvin alpha                                                               |
| hsa-miR-424-5p | <a href="#">VPS4A</a>          | vacuolar protein sorting 4 homolog A                                       |

|                |                          |                                                                            |
|----------------|--------------------------|----------------------------------------------------------------------------|
| hsa-miR-424-5p | <a href="#">IVNS1ABP</a> | influenza virus NS1A binding protein                                       |
| hsa-miR-424-5p | <a href="#">SNRPB2</a>   | small nuclear ribonucleoprotein polypeptide B2                             |
| hsa-miR-424-5p | <a href="#">MASP1</a>    | mannan binding lectin serine peptidase 1                                   |
| hsa-miR-424-5p | <a href="#">NAV1</a>     | neuron navigator 1                                                         |
| hsa-miR-424-5p | <a href="#">LARGE2</a>   | LARGE xylosyl- and glucuronyltransferase 2                                 |
| hsa-miR-424-5p | <a href="#">RET</a>      | ret proto-oncogene                                                         |
| hsa-miR-424-5p | <a href="#">MTFR1L</a>   | mitochondrial fission regulator 1 like                                     |
| hsa-miR-424-5p | <a href="#">C12orf76</a> | chromosome 12 open reading frame 76                                        |
| hsa-miR-424-5p | <a href="#">CLCN4</a>    | chloride voltage-gated channel 4                                           |
| hsa-miR-424-5p | <a href="#">DEPDC4</a>   | DEP domain containing 4                                                    |
| hsa-miR-424-5p | <a href="#">CDK5R1</a>   | cyclin dependent kinase 5 regulatory subunit 1                             |
| hsa-miR-424-5p | <a href="#">TARBP2</a>   | TARBP2, RISC loading complex RNA binding subunit                           |
| hsa-miR-424-5p | <a href="#">IKBKB</a>    | inhibitor of nuclear factor kappa B kinase subunit beta                    |
| hsa-miR-424-5p | <a href="#">USP3</a>     | ubiquitin specific peptidase 3                                             |
| hsa-miR-424-5p | <a href="#">GALNT7</a>   | polypeptide N-acetylgalactosaminyltransferase 7                            |
| hsa-miR-424-5p | <a href="#">CDK17</a>    | cyclin dependent kinase 17                                                 |
| hsa-miR-424-5p | <a href="#">ROCK2</a>    | Rho associated coiled-coil containing protein kinase 2                     |
| hsa-miR-424-5p | <a href="#">LGR5</a>     | leucine rich repeat containing G protein-coupled receptor 5                |
| hsa-miR-424-5p | <a href="#">SCOC</a>     | short coiled-coil protein                                                  |
| hsa-miR-424-5p | <a href="#">ISLR</a>     | immunoglobulin superfamily containing leucine rich repeat                  |
| hsa-miR-424-5p | <a href="#">NRN1</a>     | neuritin 1                                                                 |
| hsa-miR-424-5p | <a href="#">ARHGAP12</a> | Rho GTPase activating protein 12                                           |
| hsa-miR-424-5p | <a href="#">KIF3B</a>    | kinesin family member 3B                                                   |
| hsa-miR-424-5p | <a href="#">SYPL1</a>    | synaptophysin like 1                                                       |
| hsa-miR-424-5p | <a href="#">OGT</a>      | O-linked N-acetylglucosamine (GlcNAc) transferase                          |
| hsa-miR-424-5p | <a href="#">MNT</a>      | MAX network transcriptional repressor                                      |
| hsa-miR-424-5p | <a href="#">YWHAH</a>    | tyrosine 3-monooxygenase/tryptophan 5-monooxygenase activation protein eta |
| hsa-miR-424-5p | <a href="#">LRRK1</a>    | leucine rich repeat kinase 1                                               |
| hsa-miR-424-5p | <a href="#">IARS</a>     | isoleucyl-tRNA synthetase                                                  |
| hsa-miR-424-5p | <a href="#">TUBA4A</a>   | tubulin alpha 4a                                                           |
| hsa-miR-424-5p | <a href="#">ANKS1A</a>   | ankyrin repeat and sterile alpha motif domain containing 1A                |
| hsa-miR-424-5p | <a href="#">DPY19L4</a>  | dpy-19 like 4                                                              |
| hsa-miR-424-5p | <a href="#">COPS7B</a>   | COP9 signalosome subunit 7B                                                |
| hsa-miR-424-5p | <a href="#">ARHGAP32</a> | Rho GTPase activating protein 32                                           |
| hsa-miR-424-5p | <a href="#">FAM91A1</a>  | family with sequence similarity 91 member A1                               |
| hsa-miR-424-5p | <a href="#">SGK1</a>     | serum/glucocorticoid regulated kinase 1                                    |
| hsa-miR-424-5p | <a href="#">NOB1</a>     | NIN1 (RPN12) binding protein 1 homolog                                     |
| hsa-miR-424-5p | <a href="#">MOB4</a>     | MOB family member 4, phocein                                               |
| hsa-miR-424-5p | <a href="#">MYO5B</a>    | myosin VB                                                                  |
| hsa-miR-424-5p | <a href="#">PCDH9</a>    | protocadherin 9                                                            |
| hsa-miR-424-5p | <a href="#">NFATC3</a>   | nuclear factor of activated T cells 3                                      |
| hsa-miR-424-5p | <a href="#">RAB9A</a>    | RAB9A, member RAS oncogene family                                          |

|                |                         |                                                       |
|----------------|-------------------------|-------------------------------------------------------|
| hsa-miR-424-5p | <a href="#">RBM12</a>   | RNA binding motif protein 12                          |
| hsa-miR-424-5p | <a href="#">CEP85L</a>  | centrosomal protein 85 like                           |
| hsa-miR-424-5p | <a href="#">ZNHIT6</a>  | zinc finger HIT-type containing 6                     |
| hsa-miR-424-5p | <a href="#">SYT4</a>    | synaptotagmin 4                                       |
| hsa-miR-424-5p | <a href="#">PDK4</a>    | pyruvate dehydrogenase kinase 4                       |
| hsa-miR-424-5p | <a href="#">PRDM4</a>   | PR/SET domain 4                                       |
| hsa-miR-424-5p | <a href="#">CPD</a>     | carboxypeptidase D                                    |
| hsa-miR-424-5p | <a href="#">RUNDC3B</a> | RUN domain containing 3B                              |
| hsa-miR-424-5p | <a href="#">SKI</a>     | SKI proto-oncogene                                    |
| hsa-miR-424-5p | <a href="#">ADRB2</a>   | adrenoceptor beta 2                                   |
| hsa-miR-424-5p | <a href="#">SSTR3</a>   | somatostatin receptor 3                               |
| hsa-miR-424-5p | <a href="#">SEH1L</a>   | SEH1 like nucleoporin                                 |
| hsa-miR-424-5p | <a href="#">FAM81A</a>  | family with sequence similarity 81 member A           |
| hsa-miR-424-5p | <a href="#">MAP3K9</a>  | mitogen-activated protein kinase kinase kinase 9      |
| hsa-miR-424-5p | <a href="#">CAPRIN1</a> | cell cycle associated protein 1                       |
| hsa-miR-424-5p | <a href="#">RBM24</a>   | RNA binding motif protein 24                          |
| hsa-miR-424-5p | <a href="#">BTG2</a>    | BTG anti-proliferation factor 2                       |
| hsa-miR-424-5p | <a href="#">PTPRD</a>   | protein tyrosine phosphatase, receptor type D         |
| hsa-miR-424-5p | <a href="#">PRRC2C</a>  | proline rich coiled-coil 2C                           |
| hsa-miR-424-5p | <a href="#">EXOC3L2</a> | exocyst complex component 3 like 2                    |
| hsa-miR-424-5p | <a href="#">CD80</a>    | CD80 molecule                                         |
| hsa-miR-424-5p | <a href="#">NSG1</a>    | neuronal vesicle trafficking associated 1             |
| hsa-miR-424-5p | <a href="#">FLT3</a>    | fms related tyrosine kinase 3                         |
| hsa-miR-424-5p | <a href="#">GNAT1</a>   | G protein subunit alpha transducin 1                  |
| hsa-miR-424-5p | <a href="#">SSR1</a>    | signal sequence receptor subunit 1                    |
| hsa-miR-424-5p | <a href="#">SAV1</a>    | salvador family WW domain containing protein 1        |
| hsa-miR-424-5p | <a href="#">PEX13</a>   | peroxisomal biogenesis factor 13                      |
| hsa-miR-424-5p | <a href="#">UNC13A</a>  | unc-13 homolog A                                      |
| hsa-miR-424-5p | <a href="#">SOBP</a>    | sine oculis binding protein homolog                   |
| hsa-miR-424-5p | <a href="#">HECTD1</a>  | HECT domain E3 ubiquitin protein ligase 1             |
| hsa-miR-424-5p | <a href="#">GFAP</a>    | glial fibrillary acidic protein                       |
| hsa-miR-424-5p | <a href="#">CMPK1</a>   | cytidine/uridine monophosphate kinase 1               |
| hsa-miR-424-5p | <a href="#">ZDHHC15</a> | zinc finger DHHC-type containing 15                   |
| hsa-miR-424-5p | <a href="#">BCL2L2</a>  | BCL2 like 2                                           |
| hsa-miR-424-5p | <a href="#">CCDC88C</a> | coiled-coil domain containing 88C                     |
| hsa-miR-424-5p | <a href="#">PELI2</a>   | pellino E3 ubiquitin protein ligase family member 2   |
| hsa-miR-424-5p | <a href="#">CHPT1</a>   | choline phosphotransferase 1                          |
| hsa-miR-424-5p | <a href="#">TMEM154</a> | transmembrane protein 154                             |
| hsa-miR-424-5p | <a href="#">ARMCX2</a>  | armadillo repeat containing X-linked 2                |
| hsa-miR-424-5p | <a href="#">HMBOX1</a>  | homeobox containing 1                                 |
| hsa-miR-424-5p | <a href="#">EPHA7</a>   | EPH receptor A7                                       |
| hsa-miR-424-5p | <a href="#">KCTD8</a>   | potassium channel tetramerization domain containing 8 |
| hsa-miR-424-5p | <a href="#">PPT2</a>    | palmitoyl-protein thioesterase 2                      |
| hsa-miR-424-5p | <a href="#">CARM1</a>   | coactivator associated arginine methyltransferase 1   |
| hsa-miR-424-5p | <a href="#">RFK</a>     | riboflavin kinase                                     |

|                |                          |                                                                                                      |
|----------------|--------------------------|------------------------------------------------------------------------------------------------------|
| hsa-miR-424-5p | <a href="#">ST8SIA3</a>  | ST8 alpha-N-acetyl-neuraminide alpha-2,8-sialyltransferase 3                                         |
| hsa-miR-424-5p | <a href="#">AGO1</a>     | argonaute RISC catalytic component 1                                                                 |
| hsa-miR-424-5p | <a href="#">RICTOR</a>   | RPTOR independent companion of MTOR complex 2                                                        |
| hsa-miR-424-5p | <a href="#">PNPLA6</a>   | patatin like phospholipase domain containing 6                                                       |
| hsa-miR-424-5p | <a href="#">ATXN7L3B</a> | ataxin 7 like 3B                                                                                     |
| hsa-miR-424-5p | <a href="#">EPC1</a>     | enhancer of polycomb homolog 1                                                                       |
| hsa-miR-424-5p | <a href="#">SIPA1L2</a>  | signal induced proliferation associated 1 like 2                                                     |
| hsa-miR-424-5p | <a href="#">CHIC1</a>    | cysteine rich hydrophobic domain 1                                                                   |
| hsa-miR-424-5p | <a href="#">AMMECR1</a>  | Alport syndrome, mental retardation, midface hypoplasia and elliptocytosis chromosomal region gene 1 |
| hsa-miR-424-5p | <a href="#">SLC39A10</a> | solute carrier family 39 member 10                                                                   |
| hsa-miR-424-5p | <a href="#">HEPHL1</a>   | hephaestin like 1                                                                                    |
| hsa-miR-424-5p | <a href="#">PIK3R1</a>   | phosphoinositide-3-kinase regulatory subunit 1                                                       |
| hsa-miR-424-5p | <a href="#">RUNX1T1</a>  | RUNX1 translocation partner 1                                                                        |
| hsa-miR-424-5p | <a href="#">HIGD1A</a>   | HIG1 hypoxia inducible domain family member 1A                                                       |
| hsa-miR-424-5p | <a href="#">KCNN4</a>    | potassium calcium-activated channel subfamily N member 4                                             |
| hsa-miR-424-5p | <a href="#">SESN1</a>    | sestrin 1                                                                                            |
| hsa-miR-424-5p | <a href="#">DENND4A</a>  | DENN domain containing 4A                                                                            |
| hsa-miR-424-5p | <a href="#">DYNC1L1</a>  | dynein cytoplasmic 1 light intermediate chain 2                                                      |
| hsa-miR-424-5p | <a href="#">WBP11</a>    | WW domain binding protein 11                                                                         |
| hsa-miR-424-5p | <a href="#">DENND2C</a>  | DENN domain containing 2C                                                                            |
| hsa-miR-424-5p | <a href="#">GLS2</a>     | glutaminase 2                                                                                        |
| hsa-miR-424-5p | <a href="#">SOX6</a>     | SRY-box 6                                                                                            |
| hsa-miR-424-5p | <a href="#">HMGA1</a>    | high mobility group AT-hook 1                                                                        |
| hsa-miR-424-5p | <a href="#">NUFIP2</a>   | nuclear FMR1 interacting protein 2                                                                   |
| hsa-miR-424-5p | <a href="#">LDLRAD2</a>  | low density lipoprotein receptor class A domain containing 2                                         |
| hsa-miR-424-5p | <a href="#">FAM122B</a>  | family with sequence similarity 122B                                                                 |
| hsa-miR-424-5p | <a href="#">ANKRD46</a>  | ankyrin repeat domain 46                                                                             |
| hsa-miR-424-5p | <a href="#">ATF6</a>     | activating transcription factor 6                                                                    |
| hsa-miR-424-5p | <a href="#">COBL1</a>    | cordon-bleu WH2 repeat protein like 1                                                                |
| hsa-miR-424-5p | <a href="#">ELMOD1</a>   | ELMO domain containing 1                                                                             |
| hsa-miR-424-5p | <a href="#">HTR4</a>     | 5-hydroxytryptamine receptor 4                                                                       |
| hsa-miR-424-5p | <a href="#">TSC22D2</a>  | TSC22 domain family member 2                                                                         |
| hsa-miR-424-5p | <a href="#">UTP25</a>    | UTP25, small subunit processor component                                                             |
| hsa-miR-424-5p | <a href="#">USP44</a>    | ubiquitin specific peptidase 44                                                                      |
| hsa-miR-424-5p | <a href="#">EYA1</a>     | EYA transcriptional coactivator and phosphatase 1                                                    |
| hsa-miR-424-5p | <a href="#">MYEF2</a>    | myelin expression factor 2                                                                           |
| hsa-miR-424-5p | <a href="#">UBR3</a>     | ubiquitin protein ligase E3 component n-recogin 3                                                    |
| hsa-miR-424-5p | <a href="#">MCU</a>      | mitochondrial calcium uniporter                                                                      |
| hsa-miR-424-5p | <a href="#">ATG13</a>    | autophagy related 13                                                                                 |
| hsa-miR-424-5p | <a href="#">PLRG1</a>    | pleiotropic regulator 1                                                                              |
| hsa-miR-424-5p | <a href="#">FAM110C</a>  | family with sequence similarity 110 member C                                                         |
| hsa-miR-424-5p | <a href="#">IGF2R</a>    | insulin like growth factor 2 receptor                                                                |



|                |                          |                                                                      |
|----------------|--------------------------|----------------------------------------------------------------------|
| hsa-miR-424-5p | <a href="#">SLC4A4</a>   | solute carrier family 4 member 4                                     |
| hsa-miR-424-5p | <a href="#">PIP4P1</a>   | phosphatidylinositol-4,5-bisphosphate 4-phosphatase 1                |
| hsa-miR-424-5p | <a href="#">MAN2A2</a>   | mannosidase alpha class 2A member 2                                  |
| hsa-miR-424-5p | <a href="#">CDK8</a>     | cyclin dependent kinase 8                                            |
| hsa-miR-424-5p | <a href="#">CYP2S1</a>   | cytochrome P450 family 2 subfamily S member 1                        |
| hsa-miR-424-5p | <a href="#">ZCCHC2</a>   | zinc finger CCHC-type containing 2                                   |
| hsa-miR-424-5p | <a href="#">OTX1</a>     | orthodenticle homeobox 1                                             |
| hsa-miR-424-5p | <a href="#">NF1</a>      | neurofibromin 1                                                      |
| hsa-miR-424-5p | <a href="#">DMTF1</a>    | cyclin D binding myb like transcription factor 1                     |
| hsa-miR-424-5p | <a href="#">TMEM199</a>  | transmembrane protein 199                                            |
| hsa-miR-424-5p | <a href="#">RELN</a>     | reelin                                                               |
| hsa-miR-424-5p | <a href="#">ZBTB20</a>   | zinc finger and BTB domain containing 20                             |
| hsa-miR-424-5p | <a href="#">FAM89A</a>   | family with sequence similarity 89 member A                          |
| hsa-miR-424-5p | <a href="#">NSMF</a>     | NMDA receptor synaptonuclear signaling and neuronal migration factor |
| hsa-miR-424-5p | <a href="#">ST7L</a>     | suppression of tumorigenicity 7 like                                 |
| hsa-miR-424-5p | <a href="#">SPTBN2</a>   | spectrin beta, non-erythrocytic 2                                    |
| hsa-miR-424-5p | <a href="#">TGIF2</a>    | TGFB induced factor homeobox 2                                       |
| hsa-miR-424-5p | <a href="#">RAD50</a>    | RAD50 double strand break repair protein                             |
| hsa-miR-424-5p | <a href="#">CAPZA2</a>   | capping actin protein of muscle Z-line subunit alpha 2               |
| hsa-miR-424-5p | <a href="#">CREBRF</a>   | CREB3 regulatory factor                                              |
| hsa-miR-424-5p | <a href="#">CD3E</a>     | CD3e molecule                                                        |
| hsa-miR-424-5p | <a href="#">FAM135A</a>  | family with sequence similarity 135 member A                         |
| hsa-miR-424-5p | <a href="#">C1QL3</a>    | complement C1q like 3                                                |
| hsa-miR-424-5p | <a href="#">TMEM135</a>  | transmembrane protein 135                                            |
| hsa-miR-424-5p | <a href="#">NRP2</a>     | neuropilin 2                                                         |
| hsa-miR-424-5p | <a href="#">SLC2A14</a>  | solute carrier family 2 member 14                                    |
| hsa-miR-424-5p | <a href="#">LRP2</a>     | LDL receptor related protein 2                                       |
| hsa-miR-424-5p | <a href="#">ACOX1</a>    | acyl-CoA oxidase 1                                                   |
| hsa-miR-424-5p | <a href="#">SLC35G1</a>  | solute carrier family 35 member G1                                   |
| hsa-miR-424-5p | <a href="#">GCC2</a>     | GRIP and coiled-coil domain containing 2                             |
| hsa-miR-424-5p | <a href="#">RSPO3</a>    | R-spondin 3                                                          |
| hsa-miR-424-5p | <a href="#">SH3GL2</a>   | SH3 domain containing GRB2 like 2, endophilin A1                     |
| hsa-miR-424-5p | <a href="#">TRAM1</a>    | translocation associated membrane protein 1                          |
| hsa-miR-424-5p | <a href="#">UROS</a>     | uroporphyrinogen III synthase                                        |
| hsa-miR-424-5p | <a href="#">SNTB2</a>    | syntrophin beta 2                                                    |
| hsa-miR-424-5p | <a href="#">CMC4</a>     | C-X9-C motif containing 4                                            |
| hsa-miR-424-5p | <a href="#">SLC6A11</a>  | solute carrier family 6 member 11                                    |
| hsa-miR-424-5p | <a href="#">ENAH</a>     | ENAH, actin regulator                                                |
| hsa-miR-424-5p | <a href="#">PPP6R3</a>   | protein phosphatase 6 regulatory subunit 3                           |
| hsa-miR-424-5p | <a href="#">HELZ</a>     | helicase with zinc finger                                            |
| hsa-miR-424-5p | <a href="#">ELAC1</a>    | elaC ribonuclease Z 1                                                |
| hsa-miR-424-5p | <a href="#">ARHGAP20</a> | Rho GTPase activating protein 20                                     |
| hsa-miR-424-5p | <a href="#">PLEKHA1</a>  | pleckstrin homology domain containing A1                             |
| hsa-miR-424-5p | <a href="#">ZC2HC1A</a>  | zinc finger C2HC-type containing 1A                                  |

|                |                              |                                                                       |
|----------------|------------------------------|-----------------------------------------------------------------------|
| hsa-miR-424-5p | <a href="#">SAMD10</a>       | sterile alpha motif domain containing 10                              |
| hsa-miR-424-5p | <a href="#">NCS1</a>         | neuronal calcium sensor 1                                             |
| hsa-miR-424-5p | <a href="#">ACVR2B</a>       | activin A receptor type 2B                                            |
| hsa-miR-424-5p | <a href="#">SVIP</a>         | small VCP interacting protein                                         |
| hsa-miR-424-5p | <a href="#">GGA3</a>         | golgi associated, gamma adaptin ear containing, ARF binding protein 3 |
| hsa-miR-424-5p | <a href="#">CPSF7</a>        | cleavage and polyadenylation specific factor 7                        |
| hsa-miR-424-5p | <a href="#">MYRIP</a>        | myosin VIIA and Rab interacting protein                               |
| hsa-miR-424-5p | <a href="#">NRBP1</a>        | nuclear receptor binding protein 1                                    |
| hsa-miR-424-5p | <a href="#">SLC2A3</a>       | solute carrier family 2 member 3                                      |
| hsa-miR-424-5p | <a href="#">RAB30</a>        | RAB30, member RAS oncogene family                                     |
| hsa-miR-424-5p | <a href="#">RSBN1</a>        | round spermatid basic protein 1                                       |
| hsa-miR-424-5p | <a href="#">AREL1</a>        | apoptosis resistant E3 ubiquitin protein ligase 1                     |
| hsa-miR-424-5p | <a href="#">LCOR</a>         | ligand dependent nuclear receptor corepressor                         |
| hsa-miR-424-5p | <a href="#">ABCF3</a>        | ATP binding cassette subfamily F member 3                             |
| hsa-miR-424-5p | <a href="#">WDTC1</a>        | WD and tetratricopeptide repeats 1                                    |
| hsa-miR-424-5p | <a href="#">LAMC1</a>        | laminin subunit gamma 1                                               |
| hsa-miR-424-5p | <a href="#">VTI1B</a>        | vesicle transport through interaction with t-SNAREs 1B                |
| hsa-miR-424-5p | <a href="#">ANXA11</a>       | annexin A11                                                           |
| hsa-miR-424-5p | <a href="#">SLC35B2</a>      | solute carrier family 35 member B2                                    |
| hsa-miR-424-5p | <a href="#">MOV10</a>        | Mov10 RISC complex RNA helicase                                       |
| hsa-miR-424-5p | <a href="#">PLXNA2</a>       | plexin A2                                                             |
| hsa-miR-424-5p | <a href="#">KPNA3</a>        | karyopherin subunit alpha 3                                           |
| hsa-miR-424-5p | <a href="#">IHH</a>          | Indian hedgehog signaling molecule                                    |
| hsa-miR-424-5p | <a href="#">LOC100130451</a> | uncharacterized LOC100130451                                          |
| hsa-miR-424-5p | <a href="#">ADAMTS6</a>      | ADAM metallopeptidase with thrombospondin type 1 motif 6              |
| hsa-miR-424-5p | <a href="#">MDN1</a>         | midasin AAA ATPase 1                                                  |
| hsa-miR-424-5p | <a href="#">SLC15A4</a>      | solute carrier family 15 member 4                                     |
| hsa-miR-424-5p | <a href="#">YRDC</a>         | yrnC N6-threonylcarbamoyltransferase domain containing                |
| hsa-miR-424-5p | <a href="#">IGF1R</a>        | insulin like growth factor 1 receptor                                 |
| hsa-miR-424-5p | <a href="#">RIMKB</a>        | ribosomal modification protein rimK like family member B              |
| hsa-miR-424-5p | <a href="#">GPN1</a>         | GPN-loop GTPase 1                                                     |
| hsa-miR-424-5p | <a href="#">LYPLA2</a>       | lysophospholipase 2                                                   |
| hsa-miR-424-5p | <a href="#">CDC27</a>        | cell division cycle 27                                                |
| hsa-miR-424-5p | <a href="#">PTCH1</a>        | patched 1                                                             |
| hsa-miR-424-5p | <a href="#">SUZ12</a>        | SUZ12, polycomb repressive complex 2 subunit                          |
| hsa-miR-424-5p | <a href="#">CUL2</a>         | cullin 2                                                              |
| hsa-miR-424-5p | <a href="#">EXT2</a>         | exostosin glycosyltransferase 2                                       |
| hsa-miR-424-5p | <a href="#">NCBP3</a>        | nuclear cap binding subunit 3                                         |
| hsa-miR-424-5p | <a href="#">HOXA10</a>       | homeobox A10                                                          |
| hsa-miR-424-5p | <a href="#">CCNJL</a>        | cyclin J like                                                         |
| hsa-miR-424-5p | <a href="#">SEMA3D</a>       | semaphorin 3D                                                         |
| hsa-miR-424-5p | <a href="#">MAP7</a>         | microtubule associated protein 7                                      |
| hsa-miR-424-5p | <a href="#">ATP13A3</a>      | ATPase 13A3                                                           |

|                |                           |                                                                   |
|----------------|---------------------------|-------------------------------------------------------------------|
| hsa-miR-424-5p | <a href="#">LOC390877</a> | adenylate kinase isoenzyme 1-like                                 |
| hsa-miR-424-5p | <a href="#">ZNF548</a>    | zinc finger protein 548                                           |
| hsa-miR-424-5p | <a href="#">BCAP29</a>    | B cell receptor associated protein 29                             |
| hsa-miR-424-5p | <a href="#">SLC1A2</a>    | solute carrier family 1 member 2                                  |
| hsa-miR-424-5p | <a href="#">MAPRE1</a>    | microtubule associated protein RP/EB family member 1              |
| hsa-miR-424-5p | <a href="#">FKBP1A</a>    | FKBP prolyl isomerase 1A                                          |
| hsa-miR-424-5p | <a href="#">PDCD1</a>     | programmed cell death 1                                           |
| hsa-miR-424-5p | <a href="#">TMEM121B</a>  | transmembrane protein 121B                                        |
| hsa-miR-424-5p | <a href="#">RTF1</a>      | RTF1 homolog, Paf1/RNA polymerase II complex component            |
| hsa-miR-424-5p | <a href="#">PRDM11</a>    | PR/SET domain 11                                                  |
| hsa-miR-424-5p | <a href="#">CNTNAP1</a>   | contactin associated protein 1                                    |
| hsa-miR-424-5p | <a href="#">CAMSAP1</a>   | calmodulin regulated spectrin associated protein 1                |
| hsa-miR-424-5p | <a href="#">RGMA</a>      | repulsive guidance molecule BMP co-receptor a                     |
| hsa-miR-424-5p | <a href="#">NEDD9</a>     | neural precursor cell expressed, developmentally down-regulated 9 |
| hsa-miR-424-5p | <a href="#">SPAG7</a>     | sperm associated antigen 7                                        |
| hsa-miR-424-5p | <a href="#">RAB40AL</a>   | RAB40A like                                                       |
| hsa-miR-424-5p | <a href="#">PTAR1</a>     | protein prenyltransferase alpha subunit repeat containing 1       |
| hsa-miR-424-5p | <a href="#">SUSD6</a>     | sushi domain containing 6                                         |
| hsa-miR-424-5p | <a href="#">PID1</a>      | phosphotyrosine interaction domain containing 1                   |
| hsa-miR-424-5p | <a href="#">MMD</a>       | monocyte to macrophage differentiation associated                 |
| hsa-miR-424-5p | <a href="#">CCDC85C</a>   | coiled-coil domain containing 85C                                 |
| hsa-miR-424-5p | <a href="#">DNAJA2</a>    | DnaJ heat shock protein family (Hsp40) member A2                  |
| hsa-miR-424-5p | <a href="#">ZSWIM3</a>    | zinc finger SWIM-type containing 3                                |
| hsa-miR-424-5p | <a href="#">PDIK1L</a>    | PDLIM1 interacting kinase 1 like                                  |
| hsa-miR-424-5p | <a href="#">SESTD1</a>    | SEC14 and spectrin domain containing 1                            |
| hsa-miR-424-5p | <a href="#">IL7R</a>      | interleukin 7 receptor                                            |
| hsa-miR-424-5p | <a href="#">SMURF2</a>    | SMAD specific E3 ubiquitin protein ligase 2                       |
| hsa-miR-424-5p | <a href="#">CCDC83</a>    | coiled-coil domain containing 83                                  |
| hsa-miR-424-5p | <a href="#">SLC39A9</a>   | solute carrier family 39 member 9                                 |
| hsa-miR-424-5p | <a href="#">DLEU7</a>     | deleted in lymphocytic leukemia 7                                 |
| hsa-miR-424-5p | <a href="#">GNAQ</a>      | G protein subunit alpha q                                         |
| hsa-miR-424-5p | <a href="#">TMEM74B</a>   | transmembrane protein 74B                                         |
| hsa-miR-424-5p | <a href="#">CLDN2</a>     | claudin 2                                                         |
| hsa-miR-424-5p | <a href="#">TTC14</a>     | tetratricopeptide repeat domain 14                                |
| hsa-miR-424-5p | <a href="#">MIGA1</a>     | mitoguardin 1                                                     |
| hsa-miR-424-5p | <a href="#">ACSL4</a>     | acyl-CoA synthetase long chain family member 4                    |
| hsa-miR-424-5p | <a href="#">BCL2</a>      | BCL2, apoptosis regulator                                         |
| hsa-miR-424-5p | <a href="#">CARD10</a>    | caspase recruitment domain family member 10                       |
| hsa-miR-424-5p | <a href="#">FNTA</a>      | farnesyltransferase, CAAX box, alpha                              |
| hsa-miR-424-5p | <a href="#">SIAH1</a>     | siah E3 ubiquitin protein ligase 1                                |
| hsa-miR-424-5p | <a href="#">BMPRI1A</a>   | bone morphogenetic protein receptor type 1A                       |
| hsa-miR-424-5p | <a href="#">HECTD4</a>    | HECT domain E3 ubiquitin protein ligase 4                         |
| hsa-miR-424-5p | <a href="#">MLYCD</a>     | malonyl-CoA decarboxylase                                         |

|                |                            |                                                                |
|----------------|----------------------------|----------------------------------------------------------------|
| hsa-miR-424-5p | <a href="#">GNAI3</a>      | G protein subunit alpha i3                                     |
| hsa-miR-424-5p | <a href="#">PHACTR2</a>    | phosphatase and actin regulator 2                              |
| hsa-miR-424-5p | <a href="#">GLRX</a>       | glutaredoxin                                                   |
| hsa-miR-424-5p | <a href="#">KBTBD2</a>     | kelch repeat and BTB domain containing 2                       |
| hsa-miR-424-5p | <a href="#">PTPRI</a>      | protein tyrosine phosphatase, receptor type J                  |
| hsa-miR-424-5p | <a href="#">EIF3A</a>      | eukaryotic translation initiation factor 3 subunit A           |
| hsa-miR-424-5p | <a href="#">GOLGA1</a>     | golgin A1                                                      |
| hsa-miR-424-5p | <a href="#">HSPE1-MOB4</a> | HSPE1-MOB4 readthrough                                         |
| hsa-miR-424-5p | <a href="#">C16orf72</a>   | chromosome 16 open reading frame 72                            |
| hsa-miR-424-5p | <a href="#">MBNL2</a>      | muscleblind like splicing regulator 2                          |
| hsa-miR-424-5p | <a href="#">FGF9</a>       | fibroblast growth factor 9                                     |
| hsa-miR-424-5p | <a href="#">MIB1</a>       | mindbomb E3 ubiquitin protein ligase 1                         |
| hsa-miR-424-5p | <a href="#">PRKAR2A</a>    | protein kinase cAMP-dependent type II regulatory subunit alpha |
| hsa-miR-424-5p | <a href="#">MYT1L</a>      | myelin transcription factor 1 like                             |
| hsa-miR-424-5p | <a href="#">KCNU1</a>      | potassium calcium-activated channel subfamily U member 1       |
| hsa-miR-424-5p | <a href="#">IST1</a>       | IST1, ESCRT-III associated factor                              |
| hsa-miR-424-5p | <a href="#">PSKH1</a>      | protein serine kinase H1                                       |
| hsa-miR-424-5p | <a href="#">SLC13A1</a>    | solute carrier family 13 member 1                              |
| hsa-miR-424-5p | <a href="#">ZNF117</a>     | zinc finger protein 117                                        |
| hsa-miR-424-5p | <a href="#">ESRRA</a>      | estrogen related receptor alpha                                |
| hsa-miR-424-5p | <a href="#">KL</a>         | klotho                                                         |
| hsa-miR-424-5p | <a href="#">PPFIA2</a>     | PTPRF interacting protein alpha 2                              |
| hsa-miR-424-5p | <a href="#">BCL7A</a>      | BCL7A, BAF complex component                                   |
| hsa-miR-424-5p | <a href="#">USP12</a>      | ubiquitin specific peptidase 12                                |
| hsa-miR-424-5p | <a href="#">SCAI</a>       | suppressor of cancer cell invasion                             |
| hsa-miR-424-5p | <a href="#">ARPP19</a>     | cAMP regulated phosphoprotein 19                               |
| hsa-miR-424-5p | <a href="#">KPNA1</a>      | karyopherin subunit alpha 1                                    |
| hsa-miR-424-5p | <a href="#">ZNF704</a>     | zinc finger protein 704                                        |
| hsa-miR-424-5p | <a href="#">E2F7</a>       | E2F transcription factor 7                                     |
| hsa-miR-424-5p | <a href="#">GOLT1B</a>     | golgi transport 1B                                             |
| hsa-miR-424-5p | <a href="#">EPB41L4B</a>   | erythrocyte membrane protein band 4.1 like 4B                  |
| hsa-miR-424-5p | <a href="#">NF2</a>        | neurofibromin 2                                                |
| hsa-miR-424-5p | <a href="#">NUAK2</a>      | NUAK family kinase 2                                           |
| hsa-miR-424-5p | <a href="#">CCNT2</a>      | cyclin T2                                                      |
| hsa-miR-424-5p | <a href="#">SCUBE3</a>     | signal peptide, CUB domain and EGF like domain containing 3    |
| hsa-miR-424-5p | <a href="#">TRIP11</a>     | thyroid hormone receptor interactor 11                         |
| hsa-miR-424-5p | <a href="#">WNT4</a>       | Wnt family member 4                                            |
| hsa-miR-424-5p | <a href="#">G0S2</a>       | G0/G1 switch 2                                                 |
| hsa-miR-424-5p | <a href="#">DLL4</a>       | delta like canonical Notch ligand 4                            |
| hsa-miR-424-5p | <a href="#">CDHR1</a>      | cadherin related family member 1                               |
| hsa-miR-424-5p | <a href="#">HPSE2</a>      | heparanase 2 (inactive)                                        |
| hsa-miR-424-5p | <a href="#">ASNSD1</a>     | asparagine synthetase domain containing 1                      |
| hsa-miR-424-5p | <a href="#">OTUD4</a>      | OTU deubiquitinase 4                                           |

|                |                          |                                                               |
|----------------|--------------------------|---------------------------------------------------------------|
| hsa-miR-424-5p | <a href="#">ENTPD7</a>   | ectonucleoside triphosphate diphosphohydrolase 7              |
| hsa-miR-424-5p | <a href="#">RORA</a>     | RAR related orphan receptor A                                 |
| hsa-miR-424-5p | <a href="#">ELL2</a>     | elongation factor for RNA polymerase II 2                     |
| hsa-miR-424-5p | <a href="#">SALL3</a>    | spalt like transcription factor 3                             |
| hsa-miR-424-5p | <a href="#">RNF43</a>    | ring finger protein 43                                        |
| hsa-miR-424-5p | <a href="#">CLDN12</a>   | claudin 12                                                    |
| hsa-miR-424-5p | <a href="#">RAB10</a>    | RAB10, member RAS oncogene family                             |
| hsa-miR-424-5p | <a href="#">FAM122A</a>  | family with sequence similarity 122A                          |
| hsa-miR-424-5p | <a href="#">TLR1</a>     | toll like receptor 1                                          |
| hsa-miR-424-5p | <a href="#">ISM2</a>     | isthmin 2                                                     |
| hsa-miR-424-5p | <a href="#">USP9X</a>    | ubiquitin specific peptidase 9 X-linked                       |
| hsa-miR-424-5p | <a href="#">CARNMT1</a>  | carosine N-methyltransferase 1                                |
| hsa-miR-424-5p | <a href="#">ERC2</a>     | ELKS/RAB6-interacting/CAST family member 2                    |
| hsa-miR-424-5p | <a href="#">PPIF</a>     | peptidylprolyl isomerase F                                    |
| hsa-miR-424-5p | <a href="#">NUCKS1</a>   | nuclear casein kinase and cyclin dependent kinase substrate 1 |
| hsa-miR-424-5p | <a href="#">CRIM1</a>    | cysteine rich transmembrane BMP regulator 1                   |
| hsa-miR-424-5p | <a href="#">ANLN</a>     | anillin actin binding protein                                 |
| hsa-miR-424-5p | <a href="#">BOLA3</a>    | bolA family member 3                                          |
| hsa-miR-424-5p | <a href="#">KCNQ5</a>    | potassium voltage-gated channel subfamily Q member 5          |
| hsa-miR-424-5p | <a href="#">ATG4B</a>    | autophagy related 4B cysteine peptidase                       |
| hsa-miR-424-5p | <a href="#">TRIM35</a>   | tripartite motif containing 35                                |
| hsa-miR-424-5p | <a href="#">MXD3</a>     | MAX dimerization protein 3                                    |
| hsa-miR-424-5p | <a href="#">CLCN3</a>    | chloride voltage-gated channel 3                              |
| hsa-miR-424-5p | <a href="#">LY9</a>      | lymphocyte antigen 9                                          |
| hsa-miR-424-5p | <a href="#">IP6K1</a>    | inositol hexakisphosphate kinase 1                            |
| hsa-miR-424-5p | <a href="#">LRRFIP2</a>  | LRR binding FLII interacting protein 2                        |
| hsa-miR-424-5p | <a href="#">DNAJC16</a>  | DnaJ heat shock protein family (Hsp40) member C16             |
| hsa-miR-424-5p | <a href="#">ACSS2</a>    | acyl-CoA synthetase short chain family member 2               |
| hsa-miR-424-5p | <a href="#">CASZ1</a>    | castor zinc finger 1                                          |
| hsa-miR-424-5p | <a href="#">LHX3</a>     | LIM homeobox 3                                                |
| hsa-miR-424-5p | <a href="#">STXBP1</a>   | syntaxin binding protein 1                                    |
| hsa-miR-424-5p | <a href="#">CBFA2T3</a>  | CBFA2/RUNX1 translocation partner 3                           |
| hsa-miR-424-5p | <a href="#">FAM160B1</a> | family with sequence similarity 160 member B1                 |
| hsa-miR-424-5p | <a href="#">TTC1</a>     | tetratricopeptide repeat domain 1                             |
| hsa-miR-424-5p | <a href="#">PNISR</a>    | PNN interacting serine and arginine rich protein              |
| hsa-miR-424-5p | <a href="#">KIF1C</a>    | kinesin family member 1C                                      |
| hsa-miR-424-5p | <a href="#">SNRK</a>     | SNF related kinase                                            |
| hsa-miR-424-5p | <a href="#">FAT3</a>     | FAT atypical cadherin 3                                       |
| hsa-miR-424-5p | <a href="#">IRAK2</a>    | interleukin 1 receptor associated kinase 2                    |
| hsa-miR-424-5p | <a href="#">EML6</a>     | EMAP like 6                                                   |
| hsa-miR-424-5p | <a href="#">NOTCH2</a>   | notch 2                                                       |
| hsa-miR-424-5p | <a href="#">SRSF11</a>   | serine and arginine rich splicing factor 11                   |
| hsa-miR-424-5p | <a href="#">CREBL2</a>   | cAMP responsive element binding protein like 2                |
| hsa-miR-424-5p | <a href="#">ADSS</a>     | adenylosuccinate synthase                                     |

|                |                          |                                                                              |
|----------------|--------------------------|------------------------------------------------------------------------------|
| hsa-miR-424-5p | <a href="#">ATP7A</a>    | ATPase copper transporting alpha                                             |
| hsa-miR-424-5p | <a href="#">KLHL18</a>   | kelch like family member 18                                                  |
| hsa-miR-424-5p | <a href="#">INSYN2</a>   | inhibitory synaptic factor 2A                                                |
| hsa-miR-424-5p | <a href="#">RAPH1</a>    | Ras association (RalGDS/AF-6) and pleckstrin homology domains 1              |
| hsa-miR-424-5p | <a href="#">TRMT9B</a>   | tRNA methyltransferase 9B (putative)                                         |
| hsa-miR-424-5p | <a href="#">SLC6A4</a>   | solute carrier family 6 member 4                                             |
| hsa-miR-424-5p | <a href="#">ADAMTSL3</a> | ADAMTS like 3                                                                |
| hsa-miR-424-5p | <a href="#">NAA15</a>    | N(alpha)-acetyltransferase 15, NatA auxiliary subunit                        |
| hsa-miR-424-5p | <a href="#">ENTPD1</a>   | ectonucleoside triphosphate diphosphohydrolase 1                             |
| hsa-miR-424-5p | <a href="#">POLR3F</a>   | RNA polymerase III subunit F                                                 |
| hsa-miR-424-5p | <a href="#">TFAP2D</a>   | transcription factor AP-2 delta                                              |
| hsa-miR-424-5p | <a href="#">ZNF264</a>   | zinc finger protein 264                                                      |
| hsa-miR-424-5p | <a href="#">DOLPP1</a>   | dolichyldiphosphatase 1                                                      |
| hsa-miR-424-5p | <a href="#">ARHGAP5</a>  | Rho GTPase activating protein 5                                              |
| hsa-miR-424-5p | <a href="#">OSCP1</a>    | organic solute carrier partner 1                                             |
| hsa-miR-424-5p | <a href="#">ZNF423</a>   | zinc finger protein 423                                                      |
| hsa-miR-424-5p | <a href="#">RAF1</a>     | Raf-1 proto-oncogene, serine/threonine kinase                                |
| hsa-miR-424-5p | <a href="#">PRTG</a>     | protogenin                                                                   |
| hsa-miR-424-5p | <a href="#">RIC1</a>     | RIC1 homolog, RAB6A GEF complex partner 1                                    |
| hsa-miR-424-5p | <a href="#">HPCAL4</a>   | hippocalcin like 4                                                           |
| hsa-miR-424-5p | <a href="#">ESPN</a>     | espin                                                                        |
| hsa-miR-424-5p | <a href="#">IL10RA</a>   | interleukin 10 receptor subunit alpha                                        |
| hsa-miR-424-5p | <a href="#">SATB2</a>    | SATB homeobox 2                                                              |
| hsa-miR-424-5p | <a href="#">YAP1</a>     | Yes associated protein 1                                                     |
| hsa-miR-424-5p | <a href="#">RIF1</a>     | replication timing regulatory factor 1                                       |
| hsa-miR-424-5p | <a href="#">EN2</a>      | engrailed homeobox 2                                                         |
| hsa-miR-424-5p | <a href="#">MAPK9</a>    | mitogen-activated protein kinase 9                                           |
| hsa-miR-424-5p | <a href="#">RTN4</a>     | reticulon 4                                                                  |
| hsa-miR-424-5p | <a href="#">MARCH4</a>   | membrane associated ring-CH-type finger 4                                    |
| hsa-miR-424-5p | <a href="#">HMGA2</a>    | high mobility group AT-hook 2                                                |
| hsa-miR-424-5p | <a href="#">ZDHHC23</a>  | zinc finger DHHC-type containing 23                                          |
| hsa-miR-424-5p | <a href="#">RNF41</a>    | ring finger protein 41                                                       |
| hsa-miR-424-5p | <a href="#">SLC35A4</a>  | solute carrier family 35 member A4                                           |
| hsa-miR-424-5p | <a href="#">YWHAQ</a>    | tyrosine 3-monooxygenase/tryptophan 5-monooxygenase activation protein theta |
| hsa-miR-424-5p | <a href="#">AFF4</a>     | AF4/FMR2 family member 4                                                     |
| hsa-miR-424-5p | <a href="#">C2orf72</a>  | chromosome 2 open reading frame 72                                           |
| hsa-miR-424-5p | <a href="#">ABCB5</a>    | ATP binding cassette subfamily B member 5                                    |
| hsa-miR-424-5p | <a href="#">TMEM43</a>   | transmembrane protein 43                                                     |
| hsa-miR-424-5p | <a href="#">SLC25A22</a> | solute carrier family 25 member 22                                           |
| hsa-miR-424-5p | <a href="#">DEPDC5</a>   | DEP domain containing 5                                                      |
| hsa-miR-424-5p | <a href="#">UHMK1</a>    | U2AF homology motif kinase 1                                                 |
| hsa-miR-424-5p | <a href="#">TACC1</a>    | transforming acidic coiled-coil containing protein 1                         |
| hsa-miR-424-5p | <a href="#">TMEM255A</a> | transmembrane protein 255A                                                   |



|                |                          |                                                                          |
|----------------|--------------------------|--------------------------------------------------------------------------|
| hsa-miR-424-5p | <a href="#">SOS2</a>     | SOS Ras/Rho guanine nucleotide exchange factor 2                         |
| hsa-miR-424-5p | <a href="#">PANK2</a>    | pantothenate kinase 2                                                    |
| hsa-miR-424-5p | <a href="#">ZNF275</a>   | zinc finger protein 275                                                  |
| hsa-miR-424-5p | <a href="#">FZD6</a>     | frizzled class receptor 6                                                |
| hsa-miR-424-5p | <a href="#">MTHFR</a>    | methylenetetrahydrofolate reductase                                      |
| hsa-miR-424-5p | <a href="#">NPAS3</a>    | neuronal PAS domain protein 3                                            |
| hsa-miR-424-5p | <a href="#">ALDH1A3</a>  | aldehyde dehydrogenase 1 family member A3                                |
| hsa-miR-424-5p | <a href="#">ABCC5</a>    | ATP binding cassette subfamily C member 5                                |
| hsa-miR-424-5p | <a href="#">GLYATL3</a>  | glycine-N-acyltransferase like 3                                         |
| hsa-miR-424-5p | <a href="#">ZDHHC16</a>  | zinc finger DHHC-type containing 16                                      |
| hsa-miR-424-5p | <a href="#">PDK3</a>     | pyruvate dehydrogenase kinase 3                                          |
| hsa-miR-424-5p | <a href="#">PRKG1</a>    | protein kinase cGMP-dependent 1                                          |
| hsa-miR-424-5p | <a href="#">MFAP5</a>    | microfibril associated protein 5                                         |
| hsa-miR-424-5p | <a href="#">MTMR4</a>    | myotubularin related protein 4                                           |
| hsa-miR-424-5p | <a href="#">ATP1B4</a>   | ATPase Na <sup>+</sup> /K <sup>+</sup> transporting family member beta 4 |
| hsa-miR-424-5p | <a href="#">CALU</a>     | calumenin                                                                |
| hsa-miR-424-5p | <a href="#">ABTB2</a>    | ankyrin repeat and BTB domain containing 2                               |
| hsa-miR-424-5p | <a href="#">FURIN</a>    | furin, paired basic amino acid cleaving enzyme                           |
| hsa-miR-424-5p | <a href="#">KIF5A</a>    | kinesin family member 5A                                                 |
| hsa-miR-424-5p | <a href="#">YOD1</a>     | YOD1 deubiquitinase                                                      |
| hsa-miR-424-5p | <a href="#">TSPAN5</a>   | tetraspanin 5                                                            |
| hsa-miR-424-5p | <a href="#">PSAT1</a>    | phosphoserine aminotransferase 1                                         |
| hsa-miR-424-5p | <a href="#">SPRTN</a>    | SprT-like N-terminal domain                                              |
| hsa-miR-424-5p | <a href="#">LATS2</a>    | large tumor suppressor kinase 2                                          |
| hsa-miR-424-5p | <a href="#">KLHDC8B</a>  | kelch domain containing 8B                                               |
| hsa-miR-424-5p | <a href="#">TSPYL2</a>   | TSPY like 2                                                              |
| hsa-miR-424-5p | <a href="#">NISCH</a>    | nischarin                                                                |
| hsa-miR-424-5p | <a href="#">CAAP1</a>    | caspase activity and apoptosis inhibitor 1                               |
| hsa-miR-424-5p | <a href="#">ANKRD33B</a> | ankyrin repeat domain 33B                                                |
| hsa-miR-424-5p | <a href="#">ZBTB33</a>   | zinc finger and BTB domain containing 33                                 |
| hsa-miR-424-5p | <a href="#">NTRK2</a>    | neurotrophic receptor tyrosine kinase 2                                  |
| hsa-miR-424-5p | <a href="#">TMEM221</a>  | transmembrane protein 221                                                |
| hsa-miR-424-5p | <a href="#">CREG1</a>    | cellular repressor of E1A stimulated genes 1                             |
| hsa-miR-424-5p | <a href="#">DEF8</a>     | differentially expressed in FDCP 8 homolog                               |
| hsa-miR-424-5p | <a href="#">WWP1</a>     | WW domain containing E3 ubiquitin protein ligase 1                       |
| hsa-miR-424-5p | <a href="#">RTN3</a>     | reticulon 3                                                              |
| hsa-miR-424-5p | <a href="#">PAQR3</a>    | progesterin and adipoQ receptor family member 3                          |
| hsa-miR-424-5p | <a href="#">LRRC27</a>   | leucine rich repeat containing 27                                        |
| hsa-miR-424-5p | <a href="#">PARP12</a>   | poly(ADP-ribose) polymerase family member 12                             |
| hsa-miR-424-5p | <a href="#">SPRY4</a>    | sprouty RTK signaling antagonist 4                                       |
| hsa-miR-424-5p | <a href="#">DENND6A</a>  | DENN domain containing 6A                                                |
| hsa-miR-424-5p | <a href="#">EXTL3</a>    | exostosin like glycosyltransferase 3                                     |
| hsa-miR-424-5p | <a href="#">TOX3</a>     | TOX high mobility group box family member 3                              |
| hsa-miR-424-5p | <a href="#">TXNDC17</a>  | thioredoxin domain containing 17                                         |
| hsa-miR-424-5p | <a href="#">ZFYVE1</a>   | zinc finger FYVE-type containing 1                                       |

|                |                           |                                                                      |
|----------------|---------------------------|----------------------------------------------------------------------|
| hsa-miR-424-5p | <a href="#">ELK4</a>      | ELK4, ETS transcription factor                                       |
| hsa-miR-424-5p | <a href="#">LDLRAD4</a>   | low density lipoprotein receptor class A domain containing 4         |
| hsa-miR-424-5p | <a href="#">FAM189B</a>   | family with sequence similarity 189 member B                         |
| hsa-miR-424-5p | <a href="#">ANK2</a>      | ankyrin 2                                                            |
| hsa-miR-424-5p | <a href="#">DCAF8</a>     | DDB1 and CUL4 associated factor 8                                    |
| hsa-miR-424-5p | <a href="#">CDC42EP2</a>  | CDC42 effector protein 2                                             |
| hsa-miR-424-5p | <a href="#">TPD52L3</a>   | TPD52 like 3                                                         |
| hsa-miR-424-5p | <a href="#">ADAMTSL1</a>  | ADAMTS like 1                                                        |
| hsa-miR-424-5p | <a href="#">SCAF11</a>    | SR-related CTD associated factor 11                                  |
| hsa-miR-424-5p | <a href="#">PPM1D</a>     | protein phosphatase, Mg <sup>2+</sup> /Mn <sup>2+</sup> dependent 1D |
| hsa-miR-424-5p | <a href="#">RAPGEFL1</a>  | Rap guanine nucleotide exchange factor like 1                        |
| hsa-miR-424-5p | <a href="#">METTL8</a>    | methyltransferase like 8                                             |
| hsa-miR-424-5p | <a href="#">PPP2R5C</a>   | protein phosphatase 2 regulatory subunit B'gamma                     |
| hsa-miR-424-5p | <a href="#">ZNF705E</a>   | zinc finger protein 705E                                             |
| hsa-miR-424-5p | <a href="#">SPSB4</a>     | splA/ryanodine receptor domain and SOCS box containing 4             |
| hsa-miR-424-5p | <a href="#">APP</a>       | amyloid beta precursor protein                                       |
| hsa-miR-424-5p | <a href="#">NOL4L</a>     | nucleolar protein 4 like                                             |
| hsa-miR-424-5p | <a href="#">PHKA1</a>     | phosphorylase kinase regulatory subunit alpha 1                      |
| hsa-miR-424-5p | <a href="#">MMS19</a>     | MMS19 homolog, cytosolic iron-sulfur assembly component              |
| hsa-miR-424-5p | <a href="#">CCND3</a>     | cyclin D3                                                            |
| hsa-miR-424-5p | <a href="#">RAB40B</a>    | RAB40B, member RAS oncogene family                                   |
| hsa-miR-424-5p | <a href="#">PLBD2</a>     | phospholipase B domain containing 2                                  |
| hsa-miR-424-5p | <a href="#">ADAMTS5</a>   | ADAM metallopeptidase with thrombospondin type 1 motif 5             |
| hsa-miR-424-5p | <a href="#">FRMPD1</a>    | FERM and PDZ domain containing 1                                     |
| hsa-miR-424-5p | <a href="#">PIEZO1</a>    | piezo type mechanosensitive ion channel component 1                  |
| hsa-miR-424-5p | <a href="#">FAT4</a>      | FAT atypical cadherin 4                                              |
| hsa-miR-424-5p | <a href="#">OTUD5</a>     | OTU deubiquitinase 5                                                 |
| hsa-miR-424-5p | <a href="#">CLSPN</a>     | claspin                                                              |
| hsa-miR-424-5p | <a href="#">RIMS3</a>     | regulating synaptic membrane exocytosis 3                            |
| hsa-miR-424-5p | <a href="#">COPS7A</a>    | COP9 signalosome subunit 7A                                          |
| hsa-miR-424-5p | <a href="#">KMT2A</a>     | lysine methyltransferase 2A                                          |
| hsa-miR-424-5p | <a href="#">TCIM</a>      | transcriptional and immune response regulator                        |
| hsa-miR-424-5p | <a href="#">RBM20</a>     | RNA binding motif protein 20                                         |
| hsa-miR-424-5p | <a href="#">BTLA</a>      | B and T lymphocyte associated                                        |
| hsa-miR-424-5p | <a href="#">TPM2</a>      | tropomyosin 2                                                        |
| hsa-miR-424-5p | <a href="#">TNFAIP8L3</a> | TNF alpha induced protein 8 like 3                                   |
| hsa-miR-424-5p | <a href="#">DLGAP1</a>    | DLG associated protein 1                                             |
| hsa-miR-424-5p | <a href="#">DEPTOR</a>    | DEP domain containing MTOR interacting protein                       |
| hsa-miR-424-5p | <a href="#">LIPE</a>      | lipase E, hormone sensitive type                                     |
| hsa-miR-424-5p | <a href="#">YIF1B</a>     | Yip1 interacting factor homolog B, membrane trafficking protein      |
| hsa-miR-424-5p | <a href="#">ZBTB10</a>    | zinc finger and BTB domain containing 10                             |

|                |                               |                                                                              |
|----------------|-------------------------------|------------------------------------------------------------------------------|
| hsa-miR-424-5p | <a href="#">NEBL</a>          | nebullette                                                                   |
| hsa-miR-424-5p | <a href="#">ETFRF1</a>        | electron transfer flavoprotein regulatory factor 1                           |
| hsa-miR-424-5p | <a href="#">PWWP2B</a>        | PWWP domain containing 2B                                                    |
| hsa-miR-424-5p | <a href="#">LRRC7</a>         | leucine rich repeat containing 7                                             |
| hsa-miR-424-5p | <a href="#">KCNAB1</a>        | potassium voltage-gated channel subfamily A member regulatory beta subunit 1 |
| hsa-miR-424-5p | <a href="#">SINHCAF</a>       | SIN3-HDAC complex associated factor                                          |
| hsa-miR-424-5p | <a href="#">C5orf63</a>       | chromosome 5 open reading frame 63                                           |
| hsa-miR-424-5p | <a href="#">DYNC1I1</a>       | dynein cytoplasmic 1 intermediate chain 1                                    |
| hsa-miR-424-5p | <a href="#">SRPRB</a>         | SRP receptor subunit beta                                                    |
| hsa-miR-424-5p | <a href="#">PLPP3</a>         | phospholipid phosphatase 3                                                   |
| hsa-miR-424-5p | <a href="#">CCNI</a>          | cyclin J                                                                     |
| hsa-miR-424-5p | <a href="#">RNF125</a>        | ring finger protein 125                                                      |
| hsa-miR-424-5p | <a href="#">PHF20</a>         | PHD finger protein 20                                                        |
| hsa-miR-424-5p | <a href="#">PLSCR4</a>        | phospholipid scramblase 4                                                    |
| hsa-miR-424-5p | <a href="#">MINDY2</a>        | MINDY lysine 48 deubiquitinase 2                                             |
| hsa-miR-424-5p | <a href="#">BDNF</a>          | brain derived neurotrophic factor                                            |
| hsa-miR-424-5p | <a href="#">PPM1K</a>         | protein phosphatase, Mg <sup>2+</sup> /Mn <sup>2+</sup> dependent 1K         |
| hsa-miR-424-5p | <a href="#">PCBP4</a>         | poly(rC) binding protein 4                                                   |
| hsa-miR-424-5p | <a href="#">SLITRK1</a>       | SLIT and NTRK like family member 1                                           |
| hsa-miR-424-5p | <a href="#">DCUN1D1</a>       | defective in cullin neddylation 1 domain containing 1                        |
| hsa-miR-424-5p | <a href="#">ADCY5</a>         | adenylate cyclase 5                                                          |
| hsa-miR-424-5p | <a href="#">ZNF267</a>        | zinc finger protein 267                                                      |
| hsa-miR-424-5p | <a href="#">PACRG</a>         | parkin coregulated                                                           |
| hsa-miR-424-5p | <a href="#">TSC1</a>          | TSC complex subunit 1                                                        |
| hsa-miR-424-5p | <a href="#">RGS8</a>          | regulator of G protein signaling 8                                           |
| hsa-miR-424-5p | <a href="#">USP49</a>         | ubiquitin specific peptidase 49                                              |
| hsa-miR-424-5p | <a href="#">ASB1</a>          | ankyrin repeat and SOCS box containing 1                                     |
| hsa-miR-424-5p | <a href="#">ZNF559-ZNF177</a> | ZNF559-ZNF177 readthrough                                                    |
| hsa-miR-424-5p | <a href="#">ZNF177</a>        | zinc finger protein 177                                                      |
| hsa-miR-424-5p | <a href="#">CRKL</a>          | CRK like proto-oncogene, adaptor protein                                     |
| hsa-miR-424-5p | <a href="#">POM121C</a>       | POM121 transmembrane nucleoporin C                                           |
| hsa-miR-424-5p | <a href="#">RAB4B</a>         | RAB4B, member RAS oncogene family                                            |
| hsa-miR-424-5p | <a href="#">TTC25</a>         | tetratricopeptide repeat domain 25                                           |
| hsa-miR-424-5p | <a href="#">ELAC2</a>         | elaC ribonuclease Z 2                                                        |
| hsa-miR-424-5p | <a href="#">RAB11FIP1</a>     | RAB11 family interacting protein 1                                           |
| hsa-miR-424-5p | <a href="#">WSB1</a>          | WD repeat and SOCS box containing 1                                          |
| hsa-miR-424-5p | <a href="#">ZBTB43</a>        | zinc finger and BTB domain containing 43                                     |
| hsa-miR-424-5p | <a href="#">PPM1H</a>         | protein phosphatase, Mg <sup>2+</sup> /Mn <sup>2+</sup> dependent 1H         |
| hsa-miR-424-5p | <a href="#">CD40</a>          | CD40 molecule                                                                |
| hsa-miR-424-5p | <a href="#">OSCAR</a>         | osteoclast associated, immunoglobulin-like receptor                          |
| hsa-miR-424-5p | <a href="#">HSPA1B</a>        | heat shock protein family A (Hsp70) member 1B                                |
| hsa-miR-424-5p | <a href="#">SLC38A4</a>       | solute carrier family 38 member 4                                            |
| hsa-miR-424-5p | <a href="#">PCDHA8</a>        | protocadherin alpha 8                                                        |
| hsa-miR-424-5p | <a href="#">PCDHAC1</a>       | protocadherin alpha subfamily C, 1                                           |

|                |                          |                                                       |
|----------------|--------------------------|-------------------------------------------------------|
| hsa-miR-424-5p | <a href="#">C8orf58</a>  | chromosome 8 open reading frame 58                    |
| hsa-miR-424-5p | <a href="#">PANK1</a>    | pantothenate kinase 1                                 |
| hsa-miR-424-5p | <a href="#">PAM</a>      | peptidylglycine alpha-amidating monooxygenase         |
| hsa-miR-424-5p | <a href="#">SIDT2</a>    | SID1 transmembrane family member 2                    |
| hsa-miR-424-5p | <a href="#">PCDHAC2</a>  | protocadherin alpha subfamily C, 2                    |
| hsa-miR-424-5p | <a href="#">PCDHA13</a>  | protocadherin alpha 13                                |
| hsa-miR-424-5p | <a href="#">ESRRG</a>    | estrogen related receptor gamma                       |
| hsa-miR-424-5p | <a href="#">FGF18</a>    | fibroblast growth factor 18                           |
| hsa-miR-424-5p | <a href="#">PCDHA10</a>  | protocadherin alpha 10                                |
| hsa-miR-424-5p | <a href="#">PCDHA5</a>   | protocadherin alpha 5                                 |
| hsa-miR-424-5p | <a href="#">BORCS6</a>   | BLOC-1 related complex subunit 6                      |
| hsa-miR-424-5p | <a href="#">PRR13</a>    | proline rich 13                                       |
| hsa-miR-424-5p | <a href="#">FNDC3B</a>   | fibronectin type III domain containing 3B             |
| hsa-miR-424-5p | <a href="#">UNC5B</a>    | unc-5 netrin receptor B                               |
| hsa-miR-424-5p | <a href="#">PCDHA6</a>   | protocadherin alpha 6                                 |
| hsa-miR-424-5p | <a href="#">PCDHA11</a>  | protocadherin alpha 11                                |
| hsa-miR-424-5p | <a href="#">RAB23</a>    | RAB23, member RAS oncogene family                     |
| hsa-miR-424-5p | <a href="#">PCDHA3</a>   | protocadherin alpha 3                                 |
| hsa-miR-424-5p | <a href="#">RNF183</a>   | ring finger protein 183                               |
| hsa-miR-424-5p | <a href="#">UBE2I1</a>   | ubiquitin conjugating enzyme E2 J1                    |
| hsa-miR-424-5p | <a href="#">KY</a>       | kyphoscoliosis peptidase                              |
| hsa-miR-424-5p | <a href="#">PDPR</a>     | pyruvate dehydrogenase phosphatase regulatory subunit |
| hsa-miR-424-5p | <a href="#">MAPK8</a>    | mitogen-activated protein kinase 8                    |
| hsa-miR-424-5p | <a href="#">COL4A3BP</a> | collagen type IV alpha 3 binding protein              |
| hsa-miR-424-5p | <a href="#">MAP3K21</a>  | mitogen-activated protein kinase kinase kinase 21     |
| hsa-miR-424-5p | <a href="#">PCDHA4</a>   | protocadherin alpha 4                                 |
| hsa-miR-424-5p | <a href="#">ABCG4</a>    | ATP binding cassette subfamily G member 4             |
| hsa-miR-424-5p | <a href="#">LYPLAL1</a>  | lysophospholipase like 1                              |
| hsa-miR-424-5p | <a href="#">CDS2</a>     | CDP-diacylglycerol synthase 2                         |
| hsa-miR-424-5p | <a href="#">HOXC8</a>    | homeobox C8                                           |
| hsa-miR-424-5p | <a href="#">PCDHA1</a>   | protocadherin alpha 1                                 |
| hsa-miR-424-5p | <a href="#">NFS1</a>     | NFS1, cysteine desulfurase                            |
| hsa-miR-424-5p | <a href="#">PCDHA7</a>   | protocadherin alpha 7                                 |
| hsa-miR-424-5p | <a href="#">PCDHA2</a>   | protocadherin alpha 2                                 |
| hsa-miR-424-5p | <a href="#">PSMA5</a>    | proteasome subunit alpha 5                            |
| hsa-miR-424-5p | <a href="#">PCDHA12</a>  | protocadherin alpha 12                                |
| hsa-miR-424-5p | <a href="#">UBE3C</a>    | ubiquitin protein ligase E3C                          |
| hsa-miR-424-5p | <a href="#">ZNF705A</a>  | zinc finger protein 705A                              |
| hsa-miR-424-5p | <a href="#">FCHSD2</a>   | FCH and double SH3 domains 2                          |
| hsa-miR-424-5p | <a href="#">CHORDC1</a>  | cysteine and histidine rich domain containing 1       |
| hsa-miR-424-5p | <a href="#">UBAC1</a>    | UBA domain containing 1                               |
| hsa-miR-424-5p | <a href="#">SNIP1</a>    | Smad nuclear interacting protein 1                    |
| hsa-miR-424-5p | <a href="#">GRK3</a>     | G protein-coupled receptor kinase 3                   |
| hsa-miR-424-5p | <a href="#">DHRS7</a>    | dehydrogenase/reductase 7                             |

|                |                         |                                                       |
|----------------|-------------------------|-------------------------------------------------------|
| hsa-miR-424-5p | <a href="#">XDH</a>     | xanthine dehydrogenase                                |
| hsa-miR-424-5p | <a href="#">GEN1</a>    | GEN1, Holliday junction 5' flap endonuclease          |
| hsa-miR-424-5p | <a href="#">NLRX1</a>   | NLR family member X1                                  |
| hsa-miR-424-5p | <a href="#">DACH1</a>   | dachshund family transcription factor 1               |
| hsa-miR-424-5p | <a href="#">ATP5MC3</a> | ATP synthase membrane subunit c locus 3               |
| hsa-miR-424-5p | <a href="#">TVP23C</a>  | trans-golgi network vesicle protein 23 homolog C      |
| hsa-miR-424-5p | <a href="#">RUBCNL</a>  | rubicon like autophagy enhancer                       |
| hsa-miR-424-5p | <a href="#">WAPL</a>    | WAPL cohesin release factor                           |
| hsa-miR-424-5p | <a href="#">BACE1</a>   | beta-secretase 1                                      |
| hsa-miR-424-5p | <a href="#">BMX</a>     | BMX non-receptor tyrosine kinase                      |
| hsa-miR-424-5p | <a href="#">RHPN2</a>   | rhophilin Rho GTPase binding protein 2                |
| hsa-miR-424-5p | <a href="#">VSIR</a>    | V-set immunoregulatory receptor                       |
| hsa-miR-424-5p | <a href="#">IRS1</a>    | insulin receptor substrate 1                          |
| hsa-miR-424-5p | <a href="#">SGCA</a>    | sarcoglycan alpha                                     |
| hsa-miR-424-5p | <a href="#">CCDC18</a>  | coiled-coil domain containing 18                      |
| hsa-miR-424-5p | <a href="#">PFKFB4</a>  | 6-phosphofructo-2-kinase/fructose-2,6-biphosphatase 4 |
| hsa-miR-424-5p | <a href="#">NAT8L</a>   | N-acetyltransferase 8 like                            |
| hsa-miR-424-5p | <a href="#">NAPEPLD</a> | N-acyl phosphatidylethanolamine phospholipase D       |
| hsa-miR-424-5p | <a href="#">DCAF7</a>   | DDB1 and CUL4 associated factor 7                     |
| hsa-miR-424-5p | <a href="#">KCNIP1</a>  | potassium voltage-gated channel interacting protein 1 |
| hsa-miR-424-5p | <a href="#">RYBP</a>    | RING1 and YY1 binding protein                         |
| hsa-miR-424-5p | <a href="#">PEX12</a>   | peroxisomal biogenesis factor 12                      |
| hsa-miR-424-5p | <a href="#">GRB10</a>   | growth factor receptor bound protein 10               |
| hsa-miR-424-5p | <a href="#">MAP2K3</a>  | mitogen-activated protein kinase kinase 3             |
| hsa-miR-424-5p | <a href="#">EMC4</a>    | ER membrane protein complex subunit 4                 |
| hsa-miR-424-5p | <a href="#">AP1S2</a>   | adaptor related protein complex 1 subunit sigma 2     |
| hsa-miR-424-5p | <a href="#">HARS2</a>   | histidyl-tRNA synthetase 2, mitochondrial             |
| hsa-miR-424-5p | <a href="#">TREM1</a>   | triggering receptor expressed on myeloid cells 1      |
| hsa-miR-424-5p | <a href="#">RAP2C</a>   | RAP2C, member of RAS oncogene family                  |
| hsa-miR-424-5p | <a href="#">CRACR2B</a> | calcium release activated channel regulator 2B        |
| hsa-miR-424-5p | <a href="#">SLC30A8</a> | solute carrier family 30 member 8                     |
| hsa-miR-424-5p | <a href="#">HAS2</a>    | hyaluronan synthase 2                                 |
| hsa-miR-424-5p | <a href="#">LRP1B</a>   | LDL receptor related protein 1B                       |
| hsa-miR-424-5p | <a href="#">SEC61A1</a> | Sec61 translocon alpha 1 subunit                      |
| hsa-miR-424-5p | <a href="#">MIEF2</a>   | mitochondrial elongation factor 2                     |
| hsa-miR-424-5p | <a href="#">GRB2</a>    | growth factor receptor bound protein 2                |
| hsa-miR-424-5p | <a href="#">PDLIM5</a>  | PDZ and LIM domain 5                                  |
| hsa-miR-424-5p | <a href="#">ANOS1</a>   | anosmin 1                                             |
| hsa-miR-424-5p | <a href="#">CDV3</a>    | CDV3 homolog                                          |
| hsa-miR-424-5p | <a href="#">SMPD1</a>   | sphingomyelin phosphodiesterase 1                     |
| hsa-miR-424-5p | <a href="#">CPSF6</a>   | cleavage and polyadenylation specific factor 6        |
| hsa-miR-424-5p | <a href="#">FRYL</a>    | FRY like transcription coactivator                    |
| hsa-miR-424-5p | <a href="#">EIF4E</a>   | eukaryotic translation initiation factor 4E           |
| hsa-miR-424-5p | <a href="#">SLC24A3</a> | solute carrier family 24 member 3                     |

|                |                          |                                                               |
|----------------|--------------------------|---------------------------------------------------------------|
| hsa-miR-424-5p | <a href="#">CLU</a>      | clusterin                                                     |
| hsa-miR-424-5p | <a href="#">IPO9</a>     | importin 9                                                    |
| hsa-miR-424-5p | <a href="#">COL24A1</a>  | collagen type XXIV alpha 1 chain                              |
| hsa-miR-424-5p | <a href="#">TEX19</a>    | testis expressed 19                                           |
| hsa-miR-424-5p | <a href="#">OCRL</a>     | OCRL, inositol polyphosphate-5-phosphatase                    |
| hsa-miR-424-5p | <a href="#">MTAP</a>     | methylthioadenosine phosphorylase                             |
| hsa-miR-424-5p | <a href="#">ZNF705D</a>  | zinc finger protein 705D                                      |
| hsa-miR-424-5p | <a href="#">UMOD</a>     | uromodulin                                                    |
| hsa-miR-424-5p | <a href="#">PARD6B</a>   | par-6 family cell polarity regulator beta                     |
| hsa-miR-424-5p | <a href="#">VSX1</a>     | visual system homeobox 1                                      |
| hsa-miR-424-5p | <a href="#">EFCAB5</a>   | EF-hand calcium binding domain 5                              |
| hsa-miR-424-5p | <a href="#">TATDN3</a>   | TatD DNase domain containing 3                                |
| hsa-miR-424-5p | <a href="#">PLS1</a>     | plastin 1                                                     |
| hsa-miR-424-5p | <a href="#">CCDC179</a>  | coiled-coil domain containing 179                             |
| hsa-miR-424-5p | <a href="#">AJUBA</a>    | ajuba LIM protein                                             |
| hsa-miR-424-5p | <a href="#">TUBA1A</a>   | tubulin alpha 1a                                              |
| hsa-miR-424-5p | <a href="#">ELMO2</a>    | engulfment and cell motility 2                                |
| hsa-miR-424-5p | <a href="#">CACNA2D4</a> | calcium voltage-gated channel auxiliary subunit alpha2delta 4 |
| hsa-miR-424-5p | <a href="#">CDC23</a>    | cell division cycle 23                                        |
| hsa-miR-424-5p | <a href="#">AP5B1</a>    | adaptor related protein complex 5 subunit beta 1              |
| hsa-miR-424-5p | <a href="#">FRY</a>      | FRY microtubule binding protein                               |
| hsa-miR-424-5p | <a href="#">MED14OS</a>  | MED14 opposite strand                                         |
| hsa-miR-424-5p | <a href="#">TARBP1</a>   | TAR (HIV-1) RNA binding protein 1                             |
| hsa-miR-424-5p | <a href="#">KCNC2</a>    | potassium voltage-gated channel subfamily C member 2          |
| hsa-miR-424-5p | <a href="#">NFRKB</a>    | nuclear factor related to kappaB binding protein              |
| hsa-miR-424-5p | <a href="#">RBSN</a>     | rabenosyn, RAB effector                                       |
| hsa-miR-424-5p | <a href="#">ITGA10</a>   | integrin subunit alpha 10                                     |
| hsa-miR-424-5p | <a href="#">DRAM1</a>    | DNA damage regulated autophagy modulator 1                    |
| hsa-miR-424-5p | <a href="#">AQP11</a>    | aquaporin 11                                                  |
| hsa-miR-424-5p | <a href="#">TBCK</a>     | TBC1 domain containing kinase                                 |
| hsa-miR-424-5p | <a href="#">SSRP1</a>    | structure specific recognition protein 1                      |
| hsa-miR-424-5p | <a href="#">TASP1</a>    | taspase 1                                                     |
| hsa-miR-424-5p | <a href="#">SARM1</a>    | sterile alpha and TIR motif containing 1                      |
| hsa-miR-424-5p | <a href="#">RNF138</a>   | ring finger protein 138                                       |
| hsa-miR-424-5p | <a href="#">B4GALT1</a>  | beta-1,4-galactosyltransferase 1                              |
| hsa-miR-424-5p | <a href="#">ZC3H11A</a>  | zinc finger CCCH-type containing 11A                          |
| hsa-miR-424-5p | <a href="#">CYB561D1</a> | cytochrome b561 family member D1                              |
| hsa-miR-424-5p | <a href="#">ITPR1</a>    | inositol 1,4,5-trisphosphate receptor type 1                  |
| hsa-miR-424-5p | <a href="#">UBE2B</a>    | ubiquitin conjugating enzyme E2 B                             |
| hsa-miR-424-5p | <a href="#">TFPI2</a>    | tissue factor pathway inhibitor 2                             |
| hsa-miR-424-5p | <a href="#">RBMS1</a>    | RNA binding motif single stranded interacting protein 1       |
| hsa-miR-424-5p | <a href="#">CYB5B</a>    | cytochrome b5 type B                                          |
| hsa-miR-424-5p | <a href="#">SEN5</a>     | SUMO specific peptidase 5                                     |
| hsa-miR-424-5p | <a href="#">GRM1</a>     | glutamate metabotropic receptor 1                             |



|                |                          |                                                                  |
|----------------|--------------------------|------------------------------------------------------------------|
| hsa-miR-424-5p | <a href="#">FCHSD1</a>   | FCH and double SH3 domains 1                                     |
| hsa-miR-424-5p | <a href="#">SIDT1</a>    | SID1 transmembrane family member 1                               |
| hsa-miR-424-5p | <a href="#">SYNDIG1</a>  | synapse differentiation inducing 1                               |
| hsa-miR-424-5p | <a href="#">SLITRK6</a>  | SLIT and NTRK like family member 6                               |
| hsa-miR-424-5p | <a href="#">ARRDC4</a>   | arrestin domain containing 4                                     |
| hsa-miR-424-5p | <a href="#">SAMD4A</a>   | sterile alpha motif domain containing 4A                         |
| hsa-miR-424-5p | <a href="#">MYLK4</a>    | myosin light chain kinase family member 4                        |
| hsa-miR-424-5p | <a href="#">CYB561</a>   | cytochrome b561                                                  |
| hsa-miR-424-5p | <a href="#">CCDC28A</a>  | coiled-coil domain containing 28A                                |
| hsa-miR-424-5p | <a href="#">KLF7</a>     | Kruppel like factor 7                                            |
| hsa-miR-424-5p | <a href="#">TMEM143</a>  | transmembrane protein 143                                        |
| hsa-miR-424-5p | <a href="#">EPHA1</a>    | EPH receptor A1                                                  |
| hsa-miR-424-5p | <a href="#">CCDC149</a>  | coiled-coil domain containing 149                                |
| hsa-miR-424-5p | <a href="#">ACACB</a>    | acetyl-CoA carboxylase beta                                      |
| hsa-miR-424-5p | <a href="#">LYNX1</a>    | Ly6/neurotoxin 1                                                 |
| hsa-miR-424-5p | <a href="#">HSPA8</a>    | heat shock protein family A (Hsp70) member 8                     |
| hsa-miR-424-5p | <a href="#">BACE2</a>    | beta-secretase 2                                                 |
| hsa-miR-424-5p | <a href="#">C15orf40</a> | chromosome 15 open reading frame 40                              |
| hsa-miR-424-5p | <a href="#">SRPK1</a>    | SRSF protein kinase 1                                            |
| hsa-miR-424-5p | <a href="#">RPS6KB1</a>  | ribosomal protein S6 kinase B1                                   |
| hsa-miR-424-5p | <a href="#">NHSL1</a>    | NHS like 1                                                       |
| hsa-miR-424-5p | <a href="#">MAP3K4</a>   | mitogen-activated protein kinase kinase kinase 4                 |
| hsa-miR-424-5p | <a href="#">VEGFD</a>    | vascular endothelial growth factor D                             |
| hsa-miR-424-5p | <a href="#">LGI2</a>     | leucine rich repeat LGI family member 2                          |
| hsa-miR-424-5p | <a href="#">FAM189A1</a> | family with sequence similarity 189 member A1                    |
| hsa-miR-424-5p | <a href="#">BRK1</a>     | BRICK1, SCAR/WAVE actin nucleating complex subunit               |
| hsa-miR-424-5p | <a href="#">TXNRD2</a>   | thioredoxin reductase 2                                          |
| hsa-miR-424-5p | <a href="#">ERLIN2</a>   | ER lipid raft associated 2                                       |
| hsa-miR-424-5p | <a href="#">PLEKHB2</a>  | pleckstrin homology domain containing B2                         |
| hsa-miR-424-5p | <a href="#">GATAD2B</a>  | GATA zinc finger domain containing 2B                            |
| hsa-miR-424-5p | <a href="#">SNX29</a>    | sorting nexin 29                                                 |
| hsa-miR-424-5p | <a href="#">CSMD1</a>    | CUB and Sushi multiple domains 1                                 |
| hsa-miR-424-5p | <a href="#">ESYT3</a>    | extended synaptotagmin 3                                         |
| hsa-miR-424-5p | <a href="#">SKIL</a>     | SKI like proto-oncogene                                          |
| hsa-miR-424-5p | <a href="#">SLC4A8</a>   | solute carrier family 4 member 8                                 |
| hsa-miR-424-5p | <a href="#">OTUB2</a>    | OTU deubiquitinase, ubiquitin aldehyde binding 2                 |
| hsa-miR-424-5p | <a href="#">PHIP</a>     | pleckstrin homology domain interacting protein                   |
| hsa-miR-424-5p | <a href="#">ISOC1</a>    | isochorismatase domain containing 1                              |
| hsa-miR-424-5p | <a href="#">TTPAL</a>    | alpha tocopherol transfer protein like                           |
| hsa-miR-424-5p | <a href="#">HS3ST5</a>   | heparan sulfate-glucosamine 3-sulfotransferase 5                 |
| hsa-miR-424-5p | <a href="#">CNNM2</a>    | cyclin and CBS domain divalent metal cation transport mediator 2 |
| hsa-miR-424-5p | <a href="#">C11orf24</a> | chromosome 11 open reading frame 24                              |
| hsa-miR-424-5p | <a href="#">ASTN1</a>    | astrotactin 1                                                    |
| hsa-miR-424-5p | <a href="#">SF3B3</a>    | splicing factor 3b subunit 3                                     |

|                |                          |                                                             |
|----------------|--------------------------|-------------------------------------------------------------|
| hsa-miR-424-5p | <a href="#">SLC16A6</a>  | solute carrier family 16 member 6                           |
| hsa-miR-424-5p | <a href="#">KCNMA1</a>   | potassium calcium-activated channel subfamily M alpha 1     |
| hsa-miR-424-5p | <a href="#">CXorf40B</a> | chromosome X open reading frame 40B                         |
| hsa-miR-424-5p | <a href="#">DSEL</a>     | dermatan sulfate epimerase like                             |
| hsa-miR-424-5p | <a href="#">CACNB4</a>   | calcium voltage-gated channel auxiliary subunit beta 4      |
| hsa-miR-424-5p | <a href="#">ELAVL4</a>   | ELAV like RNA binding protein 4                             |
| hsa-miR-424-5p | <a href="#">GLUD1</a>    | glutamate dehydrogenase 1                                   |
| hsa-miR-424-5p | <a href="#">PTPN14</a>   | protein tyrosine phosphatase, non-receptor type 14          |
| hsa-miR-424-5p | <a href="#">DNAJC24</a>  | DnaJ heat shock protein family (Hsp40) member C24           |
| hsa-miR-424-5p | <a href="#">PSMD7</a>    | proteasome 26S subunit, non-ATPase 7                        |
| hsa-miR-424-5p | <a href="#">PKDCC</a>    | protein kinase domain containing, cytoplasmic               |
| hsa-miR-424-5p | <a href="#">ZBTB7A</a>   | zinc finger and BTB domain containing 7A                    |
| hsa-miR-424-5p | <a href="#">PLEKHH1</a>  | pleckstrin homology, MyTH4 and FERM domain containing H1    |
| hsa-miR-424-5p | <a href="#">RNF111</a>   | ring finger protein 111                                     |
| hsa-miR-424-5p | <a href="#">GABRA1</a>   | gamma-aminobutyric acid type A receptor alpha1 subunit      |
| hsa-miR-424-5p | <a href="#">LAMTOR4</a>  | late endosomal/lysosomal adaptor, MAPK and MTOR activator 4 |
| hsa-miR-424-5p | <a href="#">MAMLD1</a>   | mastermind like domain containing 1                         |
| hsa-miR-424-5p | <a href="#">IL17RE</a>   | interleukin 17 receptor E                                   |
| hsa-miR-424-5p | <a href="#">NACC2</a>    | NACC family member 2                                        |
| hsa-miR-424-5p | <a href="#">DPP8</a>     | dipeptidyl peptidase 8                                      |
| hsa-miR-424-5p | <a href="#">FCRL2</a>    | Fc receptor like 2                                          |
| hsa-miR-424-5p | <a href="#">NRARP</a>    | NOTCH regulated ankyrin repeat protein                      |
| hsa-miR-424-5p | <a href="#">RAB3IP</a>   | RAB3A interacting protein                                   |
| hsa-miR-424-5p | <a href="#">ZBTB2</a>    | zinc finger and BTB domain containing 2                     |
| hsa-miR-424-5p | <a href="#">PCDHA9</a>   | protocadherin alpha 9                                       |
| hsa-miR-424-5p | <a href="#">BTN1A1</a>   | butyrophilin subfamily 1 member A1                          |
| hsa-miR-424-5p | <a href="#">XPR1</a>     | xenotropic and polytropic retrovirus receptor 1             |
| hsa-miR-424-5p | <a href="#">NDP</a>      | NDP, norrin cystine knot growth factor                      |
| hsa-miR-424-5p | <a href="#">LHFPL4</a>   | LHFPL tetraspan subfamily member 4                          |
| hsa-miR-424-5p | <a href="#">GABRP</a>    | gamma-aminobutyric acid type A receptor pi subunit          |
| hsa-miR-424-5p | <a href="#">RAB40A</a>   | RAB40A, member RAS oncogene family                          |
| hsa-miR-424-5p | <a href="#">MAFK</a>     | MAF bZIP transcription factor K                             |
| hsa-miR-424-5p | <a href="#">BACH2</a>    | BTB domain and CNC homolog 2                                |
| hsa-miR-424-5p | <a href="#">SGPL1</a>    | sphingosine-1-phosphate lyase 1                             |
| hsa-miR-424-5p | <a href="#">VSTM2A</a>   | V-set and transmembrane domain containing 2A                |
| hsa-miR-424-5p | <a href="#">FDFT1</a>    | farnesyl-diphosphate farnesyltransferase 1                  |
| hsa-miR-424-5p | <a href="#">RANBP3</a>   | RAN binding protein 3                                       |
| hsa-miR-424-5p | <a href="#">TBC1D9</a>   | TBC1 domain family member 9                                 |
| hsa-miR-424-5p | <a href="#">KLHL15</a>   | kelch like family member 15                                 |
| hsa-miR-424-5p | <a href="#">COMT</a>     | catechol-O-methyltransferase                                |
| hsa-miR-424-5p | <a href="#">IRF2BP2</a>  | interferon regulatory factor 2 binding protein 2            |
| hsa-miR-424-5p | <a href="#">ANKIB1</a>   | ankyrin repeat and IBR domain containing 1                  |

|                |                          |                                                                            |
|----------------|--------------------------|----------------------------------------------------------------------------|
| hsa-miR-424-5p | <a href="#">ODAPH</a>    | odontogenesis associated phosphoprotein                                    |
| hsa-miR-424-5p | <a href="#">STX1A</a>    | syntaxin 1A                                                                |
| hsa-miR-424-5p | <a href="#">TTC39A</a>   | tetratricopeptide repeat domain 39A                                        |
| hsa-miR-424-5p | <a href="#">MICAL2</a>   | microtubule associated monooxygenase, calponin and LIM domain containing 2 |
| hsa-miR-424-5p | <a href="#">MAP3K7</a>   | mitogen-activated protein kinase kinase kinase 7                           |
| hsa-miR-424-5p | <a href="#">LHPP</a>     | phospholysine phosphohistidine inorganic pyrophosphate phosphatase         |
| hsa-miR-424-5p | <a href="#">SYDE1</a>    | synapse defective Rho GTPase homolog 1                                     |
| hsa-miR-424-5p | <a href="#">ARHGEF12</a> | Rho guanine nucleotide exchange factor 12                                  |
| hsa-miR-424-5p | <a href="#">RELT</a>     | RELT, TNF receptor                                                         |
| hsa-miR-424-5p | <a href="#">USP14</a>    | ubiquitin specific peptidase 14                                            |
| hsa-miR-424-5p | <a href="#">CD28</a>     | CD28 molecule                                                              |
| hsa-miR-424-5p | <a href="#">PIP4K2C</a>  | phosphatidylinositol-5-phosphate 4-kinase type 2 gamma                     |
| hsa-miR-424-5p | <a href="#">ELP1</a>     | elongator complex protein 1                                                |
| hsa-miR-424-5p | <a href="#">GNA12</a>    | G protein subunit alpha 12                                                 |
| hsa-miR-424-5p | <a href="#">NMD3</a>     | NMD3 ribosome export adaptor                                               |
| hsa-miR-424-5p | <a href="#">CAB39</a>    | calcium binding protein 39                                                 |
| hsa-miR-424-5p | <a href="#">PTPRM</a>    | protein tyrosine phosphatase, receptor type M                              |
| hsa-miR-424-5p | <a href="#">MYO1C</a>    | myosin IC                                                                  |
| hsa-miR-424-5p | <a href="#">CXCR3</a>    | C-X-C motif chemokine receptor 3                                           |
| hsa-miR-424-5p | <a href="#">CNIH2</a>    | cornichon family AMPA receptor auxiliary protein 2                         |
| hsa-miR-424-5p | <a href="#">PAFAH2</a>   | platelet activating factor acetylhydrolase 2                               |
| hsa-miR-424-5p | <a href="#">BPIFA1</a>   | BPI fold containing family A member 1                                      |
| hsa-miR-424-5p | <a href="#">TAOK1</a>    | TAO kinase 1                                                               |
| hsa-miR-424-5p | <a href="#">LHFPL5</a>   | LHFPL tetraspan subfamily member 5                                         |
| hsa-miR-424-5p | <a href="#">GLCE</a>     | glucuronic acid epimerase                                                  |
| hsa-miR-424-5p | <a href="#">TNIK</a>     | TRAF2 and NCK interacting kinase                                           |
| hsa-miR-424-5p | <a href="#">SSU72</a>    | SSU72 homolog, RNA polymerase II CTD phosphatase                           |
| hsa-miR-424-5p | <a href="#">M6PR</a>     | mannose-6-phosphate receptor, cation dependent                             |
| hsa-miR-424-5p | <a href="#">SVEP1</a>    | sushi, von Willebrand factor type A, EGF and pentraxin domain containing 1 |
| hsa-miR-424-5p | <a href="#">DCN</a>      | decorin                                                                    |
| hsa-miR-424-5p | <a href="#">SEC14L4</a>  | SEC14 like lipid binding 4                                                 |
| hsa-miR-424-5p | <a href="#">C6orf222</a> | chromosome 6 open reading frame 222                                        |
| hsa-miR-424-5p | <a href="#">RBMS2</a>    | RNA binding motif single stranded interacting protein 2                    |
| hsa-miR-424-5p | <a href="#">VAMP1</a>    | vesicle associated membrane protein 1                                      |
| hsa-miR-424-5p | <a href="#">NIM1K</a>    | NIM1 serine/threonine protein kinase                                       |
| hsa-miR-424-5p | <a href="#">CMTM4</a>    | CKLF like MARVEL transmembrane domain containing 4                         |
| hsa-miR-424-5p | <a href="#">GHSR</a>     | growth hormone secretagogue receptor                                       |
| hsa-miR-424-5p | <a href="#">IGSF23</a>   | immunoglobulin superfamily member 23                                       |
| hsa-miR-424-5p | <a href="#">KCTD1</a>    | potassium channel tetramerization domain containing 1                      |
| hsa-miR-424-5p | <a href="#">TAF5</a>     | TATA-box binding protein associated factor 5                               |
| hsa-miR-424-5p | <a href="#">MYADM</a>    | myeloid associated differentiation marker                                  |
| hsa-miR-424-5p | <a href="#">LCP1</a>     | lymphocyte cytosolic protein 1                                             |

|                |                              |                                                      |
|----------------|------------------------------|------------------------------------------------------|
| hsa-miR-424-5p | <a href="#">TRIM37</a>       | tripartite motif containing 37                       |
| hsa-miR-424-5p | <a href="#">FSTL4</a>        | follistatin like 4                                   |
| hsa-miR-424-5p | <a href="#">TRAF6</a>        | TNF receptor associated factor 6                     |
| hsa-miR-424-5p | <a href="#">VWA8</a>         | von Willebrand factor A domain containing 8          |
| hsa-miR-424-5p | <a href="#">RAB3D</a>        | RAB3D, member RAS oncogene family                    |
| hsa-miR-424-5p | <a href="#">CDC42</a>        | cell division cycle 42                               |
| hsa-miR-424-5p | <a href="#">TTL</a>          | tubulin tyrosine ligase                              |
| hsa-miR-424-5p | <a href="#">PIAS1</a>        | protein inhibitor of activated STAT 1                |
| hsa-miR-424-5p | <a href="#">GRAMD2B</a>      | GRAM domain containing 2B                            |
| hsa-miR-424-5p | <a href="#">TBC1D16</a>      | TBC1 domain family member 16                         |
| hsa-miR-424-5p | <a href="#">ZNF662</a>       | zinc finger protein 662                              |
| hsa-miR-424-5p | <a href="#">MLLT6</a>        | MLLT6, PHD finger containing                         |
| hsa-miR-424-5p | <a href="#">DEDD</a>         | death effector domain containing                     |
| hsa-miR-424-5p | <a href="#">KLHL26</a>       | kelch like family member 26                          |
| hsa-miR-424-5p | <a href="#">AP2B1</a>        | adaptor related protein complex 2 subunit beta 1     |
| hsa-miR-424-5p | <a href="#">ASB7</a>         | ankyrin repeat and SOCS box containing 7             |
| hsa-miR-424-5p | <a href="#">SLC22A17</a>     | solute carrier family 22 member 17                   |
| hsa-miR-424-5p | <a href="#">ZER1</a>         | zyg-11 related cell cycle regulator                  |
| hsa-miR-424-5p | <a href="#">NFE2L1</a>       | nuclear factor, erythroid 2 like 1                   |
| hsa-miR-424-5p | <a href="#">PPP1R2</a>       | protein phosphatase 1 regulatory inhibitor subunit 2 |
| hsa-miR-424-5p | <a href="#">SOGA1</a>        | suppressor of glucose, autophagy associated 1        |
| hsa-miR-424-5p | <a href="#">CWC15</a>        | CWC15 spliceosome associated protein homolog         |
| hsa-miR-424-5p | <a href="#">PPIL4</a>        | peptidylprolyl isomerase like 4                      |
| hsa-miR-424-5p | <a href="#">CHD6</a>         | chromodomain helicase DNA binding protein 6          |
| hsa-miR-424-5p | <a href="#">ARMC8</a>        | armadillo repeat containing 8                        |
| hsa-miR-424-5p | <a href="#">CABLES2</a>      | Cdk5 and Abl enzyme substrate 2                      |
| hsa-miR-424-5p | <a href="#">GRPR</a>         | gastrin releasing peptide receptor                   |
| hsa-miR-424-5p | <a href="#">RAB35</a>        | RAB35, member RAS oncogene family                    |
| hsa-miR-424-5p | <a href="#">FAM174B</a>      | family with sequence similarity 174 member B         |
| hsa-miR-424-5p | <a href="#">ACTR1A</a>       | ARP1 actin related protein 1 homolog A               |
| hsa-miR-424-5p | <a href="#">C5orf64</a>      | chromosome 5 open reading frame 64                   |
| hsa-miR-424-5p | <a href="#">TMPRSS15</a>     | transmembrane serine protease 15                     |
| hsa-miR-424-5p | <a href="#">TMEM138</a>      | transmembrane protein 138                            |
| hsa-miR-424-5p | <a href="#">PITPNA</a>       | phosphatidylinositol transfer protein alpha          |
| hsa-miR-424-5p | <a href="#">ESRP1</a>        | epithelial splicing regulatory protein 1             |
| hsa-miR-424-5p | <a href="#">LOC100996842</a> | uncharacterized LOC100996842                         |
| hsa-miR-424-5p | <a href="#">VAPB</a>         | VAMP associated protein B and C                      |
| hsa-miR-424-5p | <a href="#">PTCD3</a>        | pentatricopeptide repeat domain 3                    |
| hsa-miR-424-5p | <a href="#">PAGR1</a>        | PAXIP1 associated glutamate rich protein 1           |
| hsa-miR-424-5p | <a href="#">ZDHHC21</a>      | zinc finger DHHC-type containing 21                  |
| hsa-miR-424-5p | <a href="#">HIPK3</a>        | homeodomain interacting protein kinase 3             |
| hsa-miR-424-5p | <a href="#">FBXO33</a>       | F-box protein 33                                     |
| hsa-miR-424-5p | <a href="#">ARMC1</a>        | armadillo repeat containing 1                        |
| hsa-miR-424-5p | <a href="#">PDCD4</a>        | programmed cell death 4                              |
| hsa-miR-424-5p | <a href="#">AK9</a>          | adenylate kinase 9                                   |

|                |                          |                                                   |
|----------------|--------------------------|---------------------------------------------------|
| hsa-miR-424-5p | <a href="#">ANKRD13B</a> | ankyrin repeat domain 13B                         |
| hsa-miR-424-5p | <a href="#">ADAM10</a>   | ADAM metalloproteinase domain 10                  |
| hsa-miR-424-5p | <a href="#">VAMP8</a>    | vesicle associated membrane protein 8             |
| hsa-miR-424-5p | <a href="#">TMEM33</a>   | transmembrane protein 33                          |
| hsa-miR-424-5p | <a href="#">SCN4B</a>    | sodium voltage-gated channel beta subunit 4       |
| hsa-miR-424-5p | <a href="#">GOLGA4</a>   | golgin A4                                         |
| hsa-miR-424-5p | <a href="#">RAD9A</a>    | RAD9 checkpoint clamp component A                 |
| hsa-miR-424-5p | <a href="#">DTNA</a>     | dystrobrevin alpha                                |
| hsa-miR-424-5p | <a href="#">BHLHE41</a>  | basic helix-loop-helix family member e41          |
| hsa-miR-424-5p | <a href="#">PRR15L</a>   | proline rich 15 like                              |
| hsa-miR-424-5p | <a href="#">CADM1</a>    | cell adhesion molecule 1                          |
| hsa-miR-424-5p | <a href="#">PLPP6</a>    | phospholipid phosphatase 6                        |
| hsa-miR-424-5p | <a href="#">PEX5</a>     | peroxisomal biogenesis factor 5                   |
| hsa-miR-424-5p | <a href="#">SH2D2A</a>   | SH2 domain containing 2A                          |
| hsa-miR-424-5p | <a href="#">TPM3</a>     | tropomyosin 3                                     |
| hsa-miR-424-5p | <a href="#">C8orf86</a>  | chromosome 8 open reading frame 86                |
| hsa-miR-424-5p | <a href="#">EYA4</a>     | EYA transcriptional coactivator and phosphatase 4 |
| hsa-miR-424-5p | <a href="#">POM121</a>   | POM121 transmembrane nucleoporin                  |
| hsa-miR-424-5p | <a href="#">HOXA3</a>    | homeobox A3                                       |
| hsa-miR-424-5p | <a href="#">NXPH1</a>    | neurexophilin 1                                   |
| hsa-miR-424-5p | <a href="#">CHRNA2</a>   | cholinergic receptor nicotinic beta 2 subunit     |
| hsa-miR-424-5p | <a href="#">GDI2</a>     | GDP dissociation inhibitor 2                      |
| hsa-miR-424-5p | <a href="#">WASL</a>     | Wiskott-Aldrich syndrome like                     |
| hsa-miR-424-5p | <a href="#">PGM2L1</a>   | phosphoglucomutase 2 like 1                       |
| hsa-miR-424-5p | <a href="#">CPNE1</a>    | copine 1                                          |
| hsa-miR-424-5p | <a href="#">CDK6</a>     | cyclin dependent kinase 6                         |
| hsa-miR-424-5p | <a href="#">NECAP1</a>   | NECAP endocytosis associated 1                    |
| hsa-miR-424-5p | <a href="#">ESS2</a>     | ess-2 splicing factor homolog                     |
| hsa-miR-424-5p | <a href="#">SCN2A</a>    | sodium voltage-gated channel alpha subunit 2      |
| hsa-miR-424-5p | <a href="#">ORC4</a>     | origin recognition complex subunit 4              |
| hsa-miR-424-5p | <a href="#">FBXO22</a>   | F-box protein 22                                  |
| hsa-miR-424-5p | <a href="#">sept-11</a>  | septin 11                                         |
| hsa-miR-424-5p | <a href="#">AEBP2</a>    | AE binding protein 2                              |
| hsa-miR-424-5p | <a href="#">ZNF436</a>   | zinc finger protein 436                           |
| hsa-miR-424-5p | <a href="#">CAST</a>     | calpastatin                                       |
| hsa-miR-424-5p | <a href="#">RASGEF5</a>  | Ras association domain family member 5            |
| hsa-miR-424-5p | <a href="#">THSD4</a>    | thrombospondin type 1 domain containing 4         |
| hsa-miR-424-5p | <a href="#">CCDC81</a>   | coiled-coil domain containing 81                  |
| hsa-miR-424-5p | <a href="#">SLC4A7</a>   | solute carrier family 4 member 7                  |
| hsa-miR-424-5p | <a href="#">MRAS</a>     | muscle RAS oncogene homolog                       |
| hsa-miR-424-5p | <a href="#">SBNB1</a>    | strawberry notch homolog 1                        |
| hsa-miR-424-5p | <a href="#">CXorf40A</a> | chromosome X open reading frame 40A               |
| hsa-miR-424-5p | <a href="#">TFEC</a>     | transcription factor EC                           |
| hsa-miR-424-5p | <a href="#">AATK</a>     | apoptosis associated tyrosine kinase              |
| hsa-miR-424-5p | <a href="#">SLC9B2</a>   | solute carrier family 9 member B2                 |

|                |                          |                                                                  |
|----------------|--------------------------|------------------------------------------------------------------|
| hsa-miR-424-5p | <a href="#">DAZAP2</a>   | DAZ associated protein 2                                         |
| hsa-miR-424-5p | <a href="#">PRKAA1</a>   | protein kinase AMP-activated catalytic subunit alpha 1           |
| hsa-miR-424-5p | <a href="#">B3GNT2</a>   | UDP-GlcNAc:betaGal beta-1,3-N-acetylglucosaminyltransferase 2    |
| hsa-miR-424-5p | <a href="#">ZNF609</a>   | zinc finger protein 609                                          |
| hsa-miR-424-5p | <a href="#">GORASP1</a>  | golgi reassembly stacking protein 1                              |
| hsa-miR-424-5p | <a href="#">RDH13</a>    | retinol dehydrogenase 13                                         |
| hsa-miR-424-5p | <a href="#">FSD1</a>     | fibronectin type III and SPRY domain containing 1                |
| hsa-miR-424-5p | <a href="#">ADAP1</a>    | ArfGAP with dual PH domains 1                                    |
| hsa-miR-424-5p | <a href="#">SWAP70</a>   | switching B cell complex subunit SWAP70                          |
| hsa-miR-424-5p | <a href="#">MIPOL1</a>   | mirror-image polydactyly 1                                       |
| hsa-miR-424-5p | <a href="#">MBTPS2</a>   | membrane bound transcription factor peptidase, site 2            |
| hsa-miR-424-5p | <a href="#">MYLK3</a>    | myosin light chain kinase 3                                      |
| hsa-miR-424-5p | <a href="#">THUMPD1</a>  | THUMP domain containing 1                                        |
| hsa-miR-424-5p | <a href="#">NEXMIF</a>   | neurite extension and migration factor                           |
| hsa-miR-424-5p | <a href="#">ZDHC14</a>   | zinc finger DHHC-type containing 14                              |
| hsa-miR-424-5p | <a href="#">FLCN</a>     | folliculin                                                       |
| hsa-miR-424-5p | <a href="#">KLC4</a>     | kinesin light chain 4                                            |
| hsa-miR-424-5p | <a href="#">PSME3</a>    | proteasome activator subunit 3                                   |
| hsa-miR-424-5p | <a href="#">ZNF699</a>   | zinc finger protein 699                                          |
| hsa-miR-424-5p | <a href="#">SLC9A8</a>   | solute carrier family 9 member A8                                |
| hsa-miR-424-5p | <a href="#">EFNB2</a>    | ephrin B2                                                        |
| hsa-miR-424-5p | <a href="#">PPP2R1A</a>  | protein phosphatase 2 scaffold subunit Aalpha                    |
| hsa-miR-424-5p | <a href="#">CDC14A</a>   | cell division cycle 14A                                          |
| hsa-miR-424-5p | <a href="#">RPRD1B</a>   | regulation of nuclear pre-mRNA domain containing 1B              |
| hsa-miR-424-5p | <a href="#">TLE4</a>     | TLE family member 4, transcriptional corepressor                 |
| hsa-miR-424-5p | <a href="#">CLCN5</a>    | chloride voltage-gated channel 5                                 |
| hsa-miR-424-5p | <a href="#">SH3BP2</a>   | SH3 domain binding protein 2                                     |
| hsa-miR-424-5p | <a href="#">VCL</a>      | vinculin                                                         |
| hsa-miR-424-5p | <a href="#">GNPDA2</a>   | glucosamine-6-phosphate deaminase 2                              |
| hsa-miR-424-5p | <a href="#">ABI2</a>     | abl interactor 2                                                 |
| hsa-miR-424-5p | <a href="#">TTC38</a>    | tetratricopeptide repeat domain 38                               |
| hsa-miR-424-5p | <a href="#">CNNM3</a>    | cyclin and CBS domain divalent metal cation transport mediator 3 |
| hsa-miR-424-5p | <a href="#">BVES</a>     | blood vessel epicardial substance                                |
| hsa-miR-424-5p | <a href="#">PEAK1</a>    | pseudopodium enriched atypical kinase 1                          |
| hsa-miR-424-5p | <a href="#">TMEM68</a>   | transmembrane protein 68                                         |
| hsa-miR-424-5p | <a href="#">AMMECR1L</a> | AMMECR1 like                                                     |
| hsa-miR-424-5p | <a href="#">AHNAK2</a>   | AHNAK nucleoprotein 2                                            |
| hsa-miR-424-5p | <a href="#">SRP72</a>    | signal recognition particle 72                                   |
| hsa-miR-424-5p | <a href="#">DNAJC5</a>   | DnaJ heat shock protein family (Hsp40) member C5                 |
| hsa-miR-424-5p | <a href="#">PLAGL1</a>   | PLAG1 like zinc finger 1                                         |
| hsa-miR-424-5p | <a href="#">C11orf53</a> | chromosome 11 open reading frame 53                              |
| hsa-miR-424-5p | <a href="#">DNAJA1</a>   | DnaJ heat shock protein family (Hsp40) member A1                 |
| hsa-miR-424-5p | <a href="#">FGFR4</a>    | fibroblast growth factor receptor 4                              |



|                |                          |                                                             |
|----------------|--------------------------|-------------------------------------------------------------|
| hsa-miR-424-5p | <a href="#">PIM1</a>     | Pim-1 proto-oncogene, serine/threonine kinase               |
| hsa-miR-424-5p | <a href="#">ZNF362</a>   | zinc finger protein 362                                     |
| hsa-miR-424-5p | <a href="#">PURA</a>     | purine rich element binding protein A                       |
| hsa-miR-424-5p | <a href="#">MCRIP1</a>   | MAPK regulated corepressor interacting protein 1            |
| hsa-miR-424-5p | <a href="#">RNMT</a>     | RNA guanine-7 methyltransferase                             |
| hsa-miR-424-5p | <a href="#">PSMF1</a>    | proteasome inhibitor subunit 1                              |
| hsa-miR-424-5p | <a href="#">MRPS2</a>    | mitochondrial ribosomal protein S2                          |
| hsa-miR-424-5p | <a href="#">TXN2</a>     | thioredoxin 2                                               |
| hsa-miR-424-5p | <a href="#">SNRNP48</a>  | small nuclear ribonucleoprotein U11/U12 subunit 48          |
| hsa-miR-424-5p | <a href="#">CNN1</a>     | calponin 1                                                  |
| hsa-miR-424-5p | <a href="#">A4GNT</a>    | alpha-1,4-N-acetylglucosaminyltransferase                   |
| hsa-miR-424-5p | <a href="#">IDH3A</a>    | isocitrate dehydrogenase 3 (NAD(+)) alpha                   |
| hsa-miR-424-5p | <a href="#">UBL3</a>     | ubiquitin like 3                                            |
| hsa-miR-424-5p | <a href="#">GDPD1</a>    | glycerophosphodiester phosphodiesterase domain containing 1 |
| hsa-miR-424-5p | <a href="#">EPB41L1</a>  | erythrocyte membrane protein band 4.1 like 1                |
| hsa-miR-424-5p | <a href="#">FOSL1</a>    | FOS like 1, AP-1 transcription factor subunit               |
| hsa-miR-424-5p | <a href="#">USP38</a>    | ubiquitin specific peptidase 38                             |
| hsa-miR-424-5p | <a href="#">GABRE</a>    | gamma-aminobutyric acid type A receptor epsilon subunit     |
| hsa-miR-424-5p | <a href="#">PHF21A</a>   | PHD finger protein 21A                                      |
| hsa-miR-424-5p | <a href="#">CA8</a>      | carbonic anhydrase 8                                        |
| hsa-miR-424-5p | <a href="#">ZNF697</a>   | zinc finger protein 697                                     |
| hsa-miR-424-5p | <a href="#">ATP4B</a>    | ATPase H+/K+ transporting subunit beta                      |
| hsa-miR-424-5p | <a href="#">LMAN2L</a>   | lectin, mannose binding 2 like                              |
| hsa-miR-424-5p | <a href="#">TECPR2</a>   | tectonin beta-propeller repeat containing 2                 |
| hsa-miR-424-5p | <a href="#">RNF213</a>   | ring finger protein 213                                     |
| hsa-miR-424-5p | <a href="#">MCFD2</a>    | multiple coagulation factor deficiency 2                    |
| hsa-miR-424-5p | <a href="#">KCNJ11</a>   | potassium voltage-gated channel subfamily J member 11       |
| hsa-miR-424-5p | <a href="#">FBXO10</a>   | F-box protein 10                                            |
| hsa-miR-424-5p | <a href="#">SNCG</a>     | synuclein gamma                                             |
| hsa-miR-424-5p | <a href="#">TRAF3</a>    | TNF receptor associated factor 3                            |
| hsa-miR-424-5p | <a href="#">TRIM36</a>   | tripartite motif containing 36                              |
| hsa-miR-424-5p | <a href="#">PDCD11</a>   | programmed cell death 11                                    |
| hsa-miR-424-5p | <a href="#">RLIM</a>     | ring finger protein, LIM domain interacting                 |
| hsa-miR-424-5p | <a href="#">HIRA</a>     | histone cell cycle regulator                                |
| hsa-miR-424-5p | <a href="#">KIAA1549</a> | KIAA1549                                                    |
| hsa-miR-424-5p | <a href="#">PARM1</a>    | prostate androgen-regulated mucin-like protein 1            |
| hsa-miR-424-5p | <a href="#">BTF3</a>     | basic transcription factor 3                                |
| hsa-miR-424-5p | <a href="#">KRTAP4-4</a> | keratin associated protein 4-4                              |
| hsa-miR-424-5p | <a href="#">TPRG1L</a>   | tumor protein p63 regulated 1 like                          |
| hsa-miR-424-5p | <a href="#">MTMR11</a>   | myotubularin related protein 11                             |
| hsa-miR-424-5p | <a href="#">WNT2B</a>    | Wnt family member 2B                                        |
| hsa-miR-424-5p | <a href="#">DCAF17</a>   | DDB1 and CUL4 associated factor 17                          |
| hsa-miR-424-5p | <a href="#">ABHD13</a>   | abhydrolase domain containing 13                            |

|                |                          |                                                                          |
|----------------|--------------------------|--------------------------------------------------------------------------|
| hsa-miR-424-5p | <a href="#">TUBGCP2</a>  | tubulin gamma complex associated protein 2                               |
| hsa-miR-424-5p | <a href="#">LRRTM2</a>   | leucine rich repeat transmembrane neuronal 2                             |
| hsa-miR-424-5p | <a href="#">ADNP2</a>    | ADNP homeobox 2                                                          |
| hsa-miR-424-5p | <a href="#">ODF2L</a>    | outer dense fiber of sperm tails 2 like                                  |
| hsa-miR-424-5p | <a href="#">LYZL4</a>    | lysozyme like 4                                                          |
| hsa-miR-424-5p | <a href="#">SELENOI</a>  | selenoprotein I                                                          |
| hsa-miR-424-5p | <a href="#">PIK3C2A</a>  | phosphatidylinositol-4-phosphate 3-kinase catalytic subunit type 2 alpha |
| hsa-miR-424-5p | <a href="#">PLEKHA5</a>  | pleckstrin homology domain containing A5                                 |
| hsa-miR-424-5p | <a href="#">FAM161A</a>  | FAM161A, centrosomal protein                                             |
| hsa-miR-424-5p | <a href="#">PIGB</a>     | phosphatidylinositol glycan anchor biosynthesis class B                  |
| hsa-miR-424-5p | <a href="#">REEP1</a>    | receptor accessory protein 1                                             |
| hsa-miR-424-5p | <a href="#">BCL9L</a>    | BCL9 like                                                                |
| hsa-miR-424-5p | <a href="#">SLC7A2</a>   | solute carrier family 7 member 2                                         |
| hsa-miR-424-5p | <a href="#">DENR</a>     | density regulated re-initiation and release factor                       |
| hsa-miR-424-5p | <a href="#">TP53INP1</a> | tumor protein p53 inducible nuclear protein 1                            |
| hsa-miR-424-5p | <a href="#">UBAP1</a>    | ubiquitin associated protein 1                                           |
| hsa-miR-424-5p | <a href="#">MOCS3</a>    | molybdenum cofactor synthesis 3                                          |
| hsa-miR-424-5p | <a href="#">XIRP2</a>    | xin actin binding repeat containing 2                                    |
| hsa-miR-424-5p | <a href="#">CHFR</a>     | checkpoint with forkhead and ring finger domains                         |
| hsa-miR-424-5p | <a href="#">C11orf68</a> | chromosome 11 open reading frame 68                                      |
| hsa-miR-424-5p | <a href="#">GCNT3</a>    | glucosaminyl (N-acetyl) transferase 3, mucin type                        |
| hsa-miR-424-5p | <a href="#">MAP3K3</a>   | mitogen-activated protein kinase kinase kinase 3                         |
| hsa-miR-424-5p | <a href="#">FAM84B</a>   | family with sequence similarity 84 member B                              |
| hsa-miR-424-5p | <a href="#">KARS</a>     | lysyl-tRNA synthetase                                                    |
| hsa-miR-424-5p | <a href="#">FRS2</a>     | fibroblast growth factor receptor substrate 2                            |
| hsa-miR-424-5p | <a href="#">USP32</a>    | ubiquitin specific peptidase 32                                          |
| hsa-miR-424-5p | <a href="#">PPP6C</a>    | protein phosphatase 6 catalytic subunit                                  |
| hsa-miR-424-5p | <a href="#">TIMM10B</a>  | translocase of inner mitochondrial membrane 10B                          |
| hsa-miR-424-5p | <a href="#">ADGRD1</a>   | adhesion G protein-coupled receptor D1                                   |
| hsa-miR-424-5p | <a href="#">C17orf51</a> | chromosome 17 open reading frame 51                                      |
| hsa-miR-424-5p | <a href="#">CNTN3</a>    | contactin 3                                                              |
| hsa-miR-424-5p | <a href="#">NSMCE3</a>   | NSE3 homolog, SMC5-SMC6 complex component                                |
| hsa-miR-424-5p | <a href="#">PRR11</a>    | proline rich 11                                                          |
| hsa-miR-424-5p | <a href="#">ALDH6A1</a>  | aldehyde dehydrogenase 6 family member A1                                |
| hsa-miR-424-5p | <a href="#">ONECUT2</a>  | one cut homeobox 2                                                       |
| hsa-miR-424-5p | <a href="#">C1orf226</a> | chromosome 1 open reading frame 226                                      |
| hsa-miR-424-5p | <a href="#">DICER1</a>   | dicer 1, ribonuclease III                                                |
| hsa-miR-424-5p | <a href="#">RRAGA</a>    | Ras related GTP binding A                                                |
| hsa-miR-424-5p | <a href="#">SELENOO</a>  | selenoprotein O                                                          |
| hsa-miR-424-5p | <a href="#">PMM1</a>     | phosphomannomutase 1                                                     |
| hsa-miR-424-5p | <a href="#">SENP2</a>    | SUMO specific peptidase 2                                                |
| hsa-miR-424-5p | <a href="#">TIGAR</a>    | TP53 induced glycolysis regulatory phosphatase                           |
| hsa-miR-424-5p | <a href="#">PCNX1</a>    | pecanex 1                                                                |

|                |                          |                                                                      |
|----------------|--------------------------|----------------------------------------------------------------------|
| hsa-miR-424-5p | <a href="#">TRPC1</a>    | transient receptor potential cation channel subfamily C member 1     |
| hsa-miR-424-5p | <a href="#">ADORA2A</a>  | adenosine A2a receptor                                               |
| hsa-miR-424-5p | <a href="#">TM7SF3</a>   | transmembrane 7 superfamily member 3                                 |
| hsa-miR-424-5p | <a href="#">CASC1</a>    | cancer susceptibility 1                                              |
| hsa-miR-424-5p | <a href="#">RGS5</a>     | regulator of G protein signaling 5                                   |
| hsa-miR-424-5p | <a href="#">OTUD6A</a>   | OTU deubiquitinase 6A                                                |
| hsa-miR-424-5p | <a href="#">ANKRD11</a>  | ankyrin repeat domain 11                                             |
| hsa-miR-424-5p | <a href="#">KLC1</a>     | kinesin light chain 1                                                |
| hsa-miR-424-5p | <a href="#">NSD2</a>     | nuclear receptor binding SET domain protein 2                        |
| hsa-miR-424-5p | <a href="#">ZHX1</a>     | zinc fingers and homeoboxes 1                                        |
| hsa-miR-424-5p | <a href="#">PPM1L</a>    | protein phosphatase, Mg <sup>2+</sup> /Mn <sup>2+</sup> dependent 1L |
| hsa-miR-424-5p | <a href="#">AKAP12</a>   | A-kinase anchoring protein 12                                        |
| hsa-miR-424-5p | <a href="#">PXMP4</a>    | peroxisomal membrane protein 4                                       |
| hsa-miR-451-5p | <a href="#">OSR1</a>     | odd-skipped related transcription factor 1                           |
| hsa-miR-451-5p | <a href="#">CUX2</a>     | cut like homeobox 2                                                  |
| hsa-miR-451-5p | <a href="#">PSMB8</a>    | proteasome subunit beta 8                                            |
| hsa-miR-451-5p | <a href="#">CXCL16</a>   | C-X-C motif chemokine ligand 16                                      |
| hsa-miR-451-5p | <a href="#">TARP</a>     | TCR gamma alternate reading frame protein                            |
| hsa-miR-451-5p | <a href="#">ST8SIA4</a>  | ST8 alpha-N-acetyl-neuraminide alpha-2,8-sialyltransferase 4         |
| hsa-miR-451-5p | <a href="#">CDKN2D</a>   | cyclin dependent kinase inhibitor 2D                                 |
| hsa-miR-451-5p | <a href="#">MIF</a>      | macrophage migration inhibitory factor                               |
| hsa-miR-451-5p | <a href="#">FBLN5</a>    | fibulin 5                                                            |
| hsa-miR-451-5p | <a href="#">SAMD4B</a>   | sterile alpha motif domain containing 4B                             |
| hsa-miR-451-5p | <a href="#">CERK</a>     | ceramide kinase                                                      |
| hsa-miR-451-5p | <a href="#">CAB39</a>    | calcium binding protein 39                                           |
| hsa-miR-451-5p | <a href="#">VAPA</a>     | VAMP associated protein A                                            |
| hsa-miR-451-5p | <a href="#">LETM2</a>    | leucine zipper and EF-hand containing transmembrane protein 2        |
| hsa-miR-451-5p | <a href="#">CMTM6</a>    | CKLF like MARVEL transmembrane domain containing 6                   |
| hsa-miR-451-5p | <a href="#">USP46</a>    | ubiquitin specific peptidase 46                                      |
| hsa-miR-451-5p | <a href="#">MEX3C</a>    | mex-3 RNA binding family member C                                    |
| hsa-miR-451-5p | <a href="#">PMM2</a>     | phosphomannomutase 2                                                 |
| hsa-miR-451-5p | <a href="#">TBC1D9B</a>  | TBC1 domain family member 9B                                         |
| hsa-miR-451-5p | <a href="#">KIAA1217</a> | KIAA1217                                                             |
| hsa-miR-451-5p | <a href="#">MAU2</a>     | MAU2 sister chromatid cohesion factor                                |
| hsa-miR-451-5p | <a href="#">RNF217</a>   | ring finger protein 217                                              |
| hsa-miR-451-5p | <a href="#">S1PR2</a>    | sphingosine-1-phosphate receptor 2                                   |
| hsa-miR-451-5p | <a href="#">MEGF6</a>    | multiple EGF like domains 6                                          |
| hsa-miR-451-5p | <a href="#">EVL</a>      | Enah/Vasp-like                                                       |
| hsa-miR-451-5p | <a href="#">FBXO33</a>   | F-box protein 33                                                     |
| hsa-miR-451-5p | <a href="#">CDKN2B</a>   | cyclin dependent kinase inhibitor 2B                                 |
| hsa-miR-451-5p | <a href="#">UCK1</a>     | uridine-cytidine kinase 1                                            |
| hsa-miR-451-5p | <a href="#">ATF2</a>     | activating transcription factor 2                                    |
| hsa-miR-451-5p | <a href="#">CAV1</a>     | caveolin 1                                                           |

|                |                          |                                                                   |
|----------------|--------------------------|-------------------------------------------------------------------|
| hsa-miR-451-5p | <a href="#">C16orf72</a> | chromosome 16 open reading frame 72                               |
| hsa-miR-451-5p | <a href="#">DCAF5</a>    | DDB1 and CUL4 associated factor 5                                 |
| hsa-miR-451-5p | <a href="#">RAB5A</a>    | RAB5A, member RAS oncogene family                                 |
| hsa-miR-451-5p | <a href="#">CACHD1</a>   | cache domain containing 1                                         |
| hsa-miR-451-5p | <a href="#">LUZP2</a>    | leucine zipper protein 2                                          |
| hsa-miR-451-5p | <a href="#">EIF2AK3</a>  | eukaryotic translation initiation factor 2 alpha kinase 3         |
| hsa-miR-451-5p | <a href="#">AKTIP</a>    | AKT interacting protein                                           |
| hsa-miR-451-5p | <a href="#">FAM171A1</a> | family with sequence similarity 171 member A1                     |
| hsa-miR-451-5p | <a href="#">TTN</a>      | titin                                                             |
| hsa-miR-451-5p | <a href="#">NEDD9</a>    | neural precursor cell expressed, developmentally down-regulated 9 |

**Table S3:** delta-CT detail for each of pro-angiogenic and/or pro-hypoxic microRNA of 8 non tumoral brain tissues from patients without glioma who underwent surgery to for epilepsy

|                         | deltaCT (CT <sup>mirX</sup> - CT <sup>RNU48</sup> ) |                 |                  |                  |                 |                 |                 |                  |                 |                  |
|-------------------------|-----------------------------------------------------|-----------------|------------------|------------------|-----------------|-----------------|-----------------|------------------|-----------------|------------------|
| Normal brain tissue     | mir-100-5p                                          | mir-126-5p      | mir-128-3p       | mir-132-3p       | mir-200b-3p     | mir-200c-3p     | mir-210-3p      | mir-221-3p       | mir-424-5p      | mir-451-5p       |
| 1                       | -1.36                                               | 6.71            | -4.16            | 0.05             | 8.07            | 7.14            | 5.17            | -1.83            | 7.98            | -1.89            |
| 2                       | -1.02                                               | 6.23            | -3.86            | -0.25            | 7.88            | 8.07            | 4.92            | -1.69            | 6.66            | -0.40            |
| 3                       | -1.32                                               | 5.01            | -5.09            | -0.43            | 8.47            | 7.96            | 6.04            | -2.19            | 6.74            | -0.26            |
| 4                       | -0.78                                               | 6.23            | -3.88            | 0.13             | 8.11            | 8.45            | 4.41            | -1.45            | 7.73            | 0.05             |
| 5                       | -0.69                                               | 6.52            | -3.87            | -0.53            | 8.09            | 8.25            | 3.81            | -1.64            | 7.87            | 0.80             |
| 6                       | -1.04                                               | 6.63            | -3.41            | 0.26             | 8.37            | 8.40            | 4.32            | -1.31            | 8.54            | 0.25             |
| 7                       | -2.29                                               | 4.73            | -5.13            | -0.71            | 7.79            | 6.96            | 4.05            | -2.87            | 6.45            | -1.86            |
| 8                       | -0.60                                               | 6.42            | -3.61            | -0.23            | 8.59            | 8.58            | 4.99            | -1.56            | 7.00            | -1.14            |
| deltaCT (mean $\pm$ SD) | -1.14 $\pm$ 0.54                                    | 6.06 $\pm$ 0.76 | -4.12 $\pm$ 0.64 | -0.22 $\pm$ 0.34 | 8.17 $\pm$ 0.28 | 7.97 $\pm$ 0.61 | 4.71 $\pm$ 0.72 | -1.82 $\pm$ 0.50 | 7.37 $\pm$ 0.76 | -0.66 $\pm$ 0.98 |

CT: cycle threshold. SD: standard deviation

RNU48: internal control

**Table S4.** Comparison of pro-angiogenic and/or pro-hypoxic miRNA effects between WHO 2016 classes.

|             | OS              | PFS             |
|-------------|-----------------|-----------------|
|             | p interaction*  | p interaction*  |
| mir-200b-3p | 0.19            | 0.15            |
| mir-200c-3p | NC <sup>†</sup> | 0.21            |
| mir-210-3p  | 0.26            | NC <sup>†</sup> |
| mir-100-5p  | 0.17            | <b>0.013</b>    |
| mir-126-5p  | 0.49            | 0.46            |
| mir-132-3p  | 0.72            | 0.72            |
| mir-221-3p  | 0.71            | 0.87            |
| mir-424-5p  | 0.30            | 0.061           |
| mir-128-3p  | 0.72            | <b>0.033</b>    |
| mir-451-5p  | NC <sup>†</sup> | 0.26            |

\* comparison of the Hazard Ratios of the 6 classes, † not calculable (too few people), OS: Overall survival; PFS: Progression Free Survival; WHO: World Health Organization
